# Supplementary material for: Comparative Shotgun Proteomics Reveals the Characteristic Protein Signature of Osteosarcoma Subtypes
Source: Cells. 2023 Aug 30;12(17):2179. doi: 10.3390/cells12172179 (PMC10487120; doi:10.3390/cells12172179)
Supplement: Supplementary file 1 [file cells-12-02179-s001.zip]

Archive with 7 entries (7 files):
- Supplementary Figure S1.pdf
- Table S1-Patient information and follow-up data.xlsx
- Table S2-Proteins identified by shotgun proteomics analysis.csv
- Table S3-Differentially expressed proteins identified upon comparing proteomes of significantly affecting clinical features.xlsx
- Table S4-Differentially expressed proteins between pathological subtypes.xlsx
- Table S5-Pathway analysis of DEPs between pathological subtypes.csv
- Table S6-GO analysis for DEPs between pathological subtypes.xlsx
