# Supplementary material for: Comparative Shotgun Proteomics Reveals the Characteristic Protein Signature of Osteosarcoma Subtypes
Source: Cells. 2023 Aug 30;12(17):2179. doi: 10.3390/cells12172179 (PMC10487120; doi:10.3390/cells12172179)
Supplement: Supplementary file 1 [file cells-12-02179-s001.zip › Table S1-Patient information and follow-up data.xlsx]

## Sheet: Osteosarcoma _2022
Patient_Code	Age	Gender	Registration_Date	Tumor _Site	Skip_Lesions	Relative_Tumor_Volume	Initial_Metastasis	Site_of_Metastasis	Pathology	Excluded_from_Analysis	Histological_Response_to_Chemotherapy	Margins	Event_Occurred	Event_coding	Date_of_First_Event	Type_of_Event	Site_of_Event	Survival_Status	Survival_Coding	Date_of_Death	Last_Date_of_Contact	Event_Free_Duration	OS_Duration
CCHE_152	4.8	Male	2011-12-25	Humerus	No	435.8	Yes	Lung	Osteoblastic	No	<90%	Negative	Yes	1	2012-02-16	Progressive	Local recurrence - Metastasis to lung and bone	Dead	1	2012-04-15	2012-04-15	1.74	3.68
CCHE_284	6.25	Male	2014-11-09	Femur	No	56.6	No	None	Telangectatic	No	<90%	Negative	Yes	1	2015-06-07	Relapse	Metastasis to bone	Dead	1	2016-02-21	2016-02-21	6.91	15.43
CCHE_193	6.62	Male	2012-12-20	Tibia	No	190	Yes	Lung	Osteoblastic	No	â‰¥90%	Negative	Yes	1	2013-12-01	Progressive	Metastasis to lung	Dead	1	2014-04-24	2014-04-24	11.38	16.12
CCHE_002	6.67	Female	2007-07-31	Tibia	No	100	No	None	Chondroblastic	No	<90%	Negative	Yes	1	2009-07-05	Relapse	Metastasis to lung	Dead	1	2009-10-28	2009-10-29	23.19	27.01
CCHE_183	7.19	Female	2012-08-28	Femur	No	240.52	No	None	Osteoblastic	No	â‰¥90%	Negative	No	0		None	None	Alive	0		2019-05-22	107.07	80.86
CCHE_219	7.24	Female	2013-07-24	Femur	No	329.9	No	None	Osteoblastic	No	<90%	Negative	Yes	1	2014-03-10	Relapse	Local recurrance - Metastasis to lung	Dead	1	2015-09-06	2015-09-06	7.53	25.46
CCHE_149	8.57	Male	2011-12-11	Femur	Yes	152.7	No	None	Osteoblastic	No	<90%	Negative	Yes	1	2012-10-10	Relapse	Metastasis to lung	Dead	1	2013-03-22	2013-03-22	10	15.36
CCHE_098	8.85	Female	2010-08-08	Radius	No	50.8	No	None	Osteoblastic	Yes	No_response	Negative	No	0		None	None	Alive	0		2019-02-21	126.51	102.6
CCHE_108	9.54	Male	2010-12-05	Tibia	Yes	278.8	Yes	Lung	Osteoblastic	No	<90%	Negative	Yes	1	2012-02-08	Progressive	Metastasis to lung	Dead	1	2012-07-27	2012-07-27	14.14	19.74
CCHE_306	10.57	Female	2015-05-19	Femur	No	NA	No	None	Telangectatic	No	<90%	Negative	Yes	1	2015-11-15	Relapse	Metastasis to lung	Dead	1	2016-01-28	2016-01-28	5.92	8.36
CCHE_273	11.74	Female	2014-09-09	Tibia	No	177.5	No	None	Chondroblastic	No	<90%	Close	No	0		None	None	Alive	0		2019-04-21	82.89	55.43
CCHE_170	11.96	Male	2012-04-22	Tibia	No	672	Yes	Lung	Osteoblastic	No	<90%	Negative	Yes	1	2012-07-11	Relapse	Metastasis to lung	Dead	1	2013-02-20	2013-02-20	2.63	10
CCHE_164	12.31	Female	2012-03-05	Femur	No	1769.9	No	None	Telangectatic	No	<90%	Negative	Yes	1	2015-05-24	Relapse	Metastasis to lung	Alive	0		2019-03-13	38.65	84.34
CCHE_082	12.48	Female	2010-01-28	Femur	No	316.1	Yes	Lung	Osteoblastic	No	<90%	Negative	No	0		None	None	Alive	0		2019-03-17	142.27	109.7
CCHE_292	12.75	Female	2015-02-24	Tibia	No	143.6	No	None	Telangectatic	No	â‰¥90%	Negative	No	0		None	None	Alive	0		2019-05-19	70.16	50.82
CCHE_261	13.26	Female	2014-05-18	Femur	No	1166.9	No	None	Chondroblastic	No	<90%	Negative	Yes	1	2015-10-11	Relapse	Metastasis to lung	Dead	1	2016-07-12	2016-07-12	16.81	25.86
CCHE_180	13.32	Male	2012-07-29	Femur	No	407.9	No	None	Telangectatic	No	â‰¥90%	Negative	No	0		None	None	Alive	0		2019-04-10	109.93	80.46
CCHE_258	13.32	Female	2014-04-01	Iliac bone	No	2565.24	Yes	Lung	Chondroblastic	No	No_response	Negative	Yes	1	2014-07-08	Progressive	Local recurrance - Metastasis to lung	Dead	1	2014-09-25	2014-09-25	3.22	5.82
CCHE_252	14.31	Male	2014-02-24	Femur	No	268.9	No	None	Chondroblastic	No	<90%	Negative	No	0		None	None	Alive	0		2019-03-31	89.08	61.22
CCHE_122	14.84	Female	2011-03-13	Femur	No	274.5	No	None	Osteoblastic	No	â‰¥90%	Negative	No	0		None	None	Alive	0		2019-09-15	102.83	102.24
CCHE_201	15.64	Male	2013-03-04	Femur	No	605.7	No	None	Chondroblastic	No	<90%	Negative	Yes	1	2013-12-29	Relapse	Metastasis to lung	Dead	1	2014-02-27	2014-02-27	9.87	11.84
CCHE_214	15.64	Male	2013-05-21	Femur	No	4799.4	Yes	Lung_bone	Chondroblastic	No	<90%	Negative	Yes	1	2013-10-25	Progressive	Metastasis to bone	Dead	1	2013-11-21	2013-11-21	5.16	6.05
CCHE_296	15.83	Male	2015-03-31	Femur	No	261.8	No	None	Fibroblastic	No	â‰¥90%	Negative	No	0		None	None	Alive	0		2019-07-30	80.43	52.04
CCHE_120	15.92	Male	2011-02-02	Tibia	No	47.7	No	None	Fibroblastic	Yes	No_response	Negative	No	0		None	None	Alive	0		2019-02-19	107.73	96.68
CCHE_038	16.05	Female	2008-12-03	Femur	No	24.96	No	None	Chondroblastic	No	<90%	Negative	No	0		None	None	Alive	0		2019-04-01	124.05	124.05
CCHE_202	16.14	Female	2013-03-07	Femur	No	273.9	No	None	Fibroblastic	No	<90%	Negative	Yes	1	2013-10-21	Relapse	Local recurrance - Metastasis to lung	Dead	1	2014-02-01	2014-02-01	7.5	10.89
CCHE_246	16.56	Female	2013-12-29	Femur	No	2995	No	None	Chondroblastic	No	<90%	Negative	Yes	1	2014-04-29	Relapse	Metastasis to lung	Dead	1	2014-09-01	2014-09-01	3.98	8.09
CCHE_209	17.09	Male	2013-04-22	Ribs	No	NA	Yes	Lung	Osteoblastic	No	<90%	Negative	Yes	1	2015-02-02	Relapse	Local recurrence	Dead	1	2016-05-24	2016-05-24	21.41	37.11
CCHE_115	17.33	Female	2011-01-02	Femur	No	121.6	No	None	Osteoblastic	No	<90%	Negative	Yes	1	2011-12-20	Relapse	Metastasis to lung	Dead	1	2012-02-25	2012-02-25	11.58	13.78
CCHE_299	17.33	Female	2015-04-12	Femur	No	449.3	Yes	Lung	Fibroblastic	No	<90%	Negative	Yes	1	2016-09-19	Relapse	Metastasis to lung	Dead	1	2018-07-15	2018-07-15	17.3	39.14
CCHE_300	17.59	Male	2015-04-12	Tibia	No	12.3	No	None	Osteoblastic	No	<90%	Negative	Yes	1	2016-08-18	Relapse	Metastasis to lung	Dead	1	2018-02-13	2018-02-13	16.25	34.14
CCHE_071	17.89	Male	2009-11-24	Tibia	No	206	Yes	Lung	Fibroblastic	No	<90%	Negative	Yes	1	2011-07-27	Relapse	Metastasis to lung	Alive	0		2019-06-27	20.07	115.2
CCHE_107	18.3	Male	2010-11-28	Femur	No	108.7	No	None	Osteoblastic	No	â‰¥90%	Negative	No	0		None	None	Alive	0		2019-03-18	114.21	99.74
