# Supplementary material for: Comparative Shotgun Proteomics Reveals the Characteristic Protein Signature of Osteosarcoma Subtypes
Source: Cells. 2023 Aug 30;12(17):2179. doi: 10.3390/cells12172179 (PMC10487120; doi:10.3390/cells12172179)
Supplement: Supplementary file 1 [file cells-12-02179-s001.zip › Table S2-Proteins identified by shotgun proteomics analysis.csv]

	CCHE_002	CCHE_201	CCHE_214	CCHE_038	CCHE_252	CCHE_258	CCHE_261	CCHE_273	CCHE_246	CCHE_296	CCHE_120	CCHE_202	CCHE_299	CCHE_071	CCHE_115	CCHE_107	CCHE_108	CCHE_149	CCHE_152	CCHE_193	CCHE_082	CCHE_122	CCHE_209	CCHE_170	CCHE_300	CCHE_098	CCHE_219	CCHE_183	CCHE_164	CCHE_180	CCHE_284	CCHE_292	CCHE_306
A0A023QZ25	NA	0.0209526391862618	NA	NA	NA	NA	NA	NA	NA	NA	NA	NA	NA	NA	NA	NA	NA	NA	0.0295791838925289	NA	NA	NA	NA	0.0200175400533457	NA	NA	NA	NA	NA	NA	NA	NA	NA
A0A024QZ42	NA	NA	0.00634794112398432	NA	NA	NA	NA	NA	NA	NA	NA	NA	NA	NA	NA	NA	NA	NA	NA	NA	NA	NA	NA	NA	NA	NA	NA	NA	NA	NA	NA	NA	NA
A0A024QZP1	NA	NA	NA	NA	NA	NA	NA	NA	NA	NA	NA	NA	NA	NA	NA	NA	NA	NA	NA	0.00400806832965714	NA	NA	NA	NA	NA	NA	NA	NA	NA	NA	NA	NA	NA
A0A024QZP7	NA	NA	NA	NA	NA	NA	NA	NA	NA	NA	NA	NA	NA	NA	NA	NA	NA	NA	NA	NA	NA	NA	0.00257520296122542	NA	NA	NA	NA	NA	NA	NA	NA	NA	NA
A0A024QZX5	NA	NA	NA	NA	0.00248470143803402	NA	NA	NA	NA	NA	NA	NA	NA	0.001096491	NA	NA	NA	NA	0.00276331855877942	NA	NA	NA	NA	NA	NA	NA	NA	NA	NA	NA	NA	NA	NA
A0A024R0E4	NA	NA	NA	NA	NA	NA	0.012848429648676	NA	NA	NA	NA	NA	NA	NA	NA	NA	NA	NA	NA	NA	NA	NA	NA	NA	NA	NA	NA	NA	NA	NA	NA	NA	NA
A0A024R210	NA	NA	NA	NA	NA	NA	0.152182510095112	NA	NA	NA	NA	NA	NA	NA	NA	NA	NA	NA	NA	NA	NA	NA	NA	NA	NA	NA	NA	NA	NA	NA	NA	NA	NA
A0A024R215	NA	NA	NA	NA	NA	NA	NA	NA	NA	NA	NA	NA	NA	NA	NA	NA	NA	NA	NA	NA	NA	NA	NA	NA	NA	NA	NA	0.00833060032952098	NA	NA	NA	NA	NA
A0A024R280	NA	NA	NA	NA	NA	NA	NA	0.00316360990328149	NA	NA	NA	NA	NA	NA	NA	NA	NA	NA	NA	NA	NA	NA	NA	NA	NA	NA	NA	NA	NA	NA	NA	NA	NA
A0A024R2F9	NA	NA	NA	NA	NA	NA	NA	0.00254502704273994	NA	NA	NA	NA	NA	NA	NA	NA	NA	NA	NA	NA	NA	NA	NA	NA	NA	NA	NA	NA	NA	NA	NA	NA	NA
A0A024R2T6	NA	NA	NA	0.00045204066382341	NA	NA	NA	NA	NA	NA	NA	NA	NA	NA	NA	NA	NA	NA	NA	NA	NA	NA	NA	NA	NA	NA	NA	NA	NA	NA	NA	NA	NA
A0A024R326	NA	0.0221092603671476	0.0195694491483951	0.00485872212006664	0.0190441015772781	0.0177858877940825	NA	0.0314345976198897	0.0112123086638713	NA	0.0199857221961865	0.0299261928436886	0.0230440805825689	0.047770701	0.0206125516916161	0.0189501458647419	0.00161335504023271	NA	0.0200648602038372	0.0105690474662398	NA	0.0167713374591414	0.021651384388269	NA	NA	NA	0.0246970277716893	0.0188632371027959	NA	NA	0.0122308325157786	0.0132598033739238	0.0118211580165341
A0A024R382	NA	NA	NA	NA	NA	NA	NA	NA	NA	NA	NA	NA	NA	NA	NA	NA	NA	NA	NA	NA	NA	NA	NA	NA	NA	NA	NA	NA	NA	NA	NA	NA	0.00127818257933988
A0A024R3B9	NA	0.0130091744189147	0.0294942917109561	NA	NA	0.00800286500690314	0.0243882226906087	NA	NA	NA	NA	NA	NA	NA	NA	NA	NA	NA	NA	NA	NA	NA	NA	NA	NA	NA	NA	NA	NA	NA	NA	NA	NA
A0A024R3G0	NA	NA	NA	NA	NA	NA	NA	NA	NA	NA	NA	NA	NA	NA	NA	NA	NA	NA	NA	NA	NA	NA	NA	NA	NA	NA	NA	0.0036160299598127	NA	NA	NA	NA	NA
A0A024R442	NA	NA	NA	NA	0.00231986818661057	NA	NA	NA	NA	NA	NA	0.002664001954046	0.00380967451762558	0.002457002	NA	NA	NA	NA	NA	NA	NA	NA	NA	NA	NA	NA	NA	NA	NA	NA	NA	NA	NA
A0A024R462	NA	NA	NA	NA	NA	NA	NA	NA	NA	NA	NA	NA	NA	NA	NA	NA	NA	NA	NA	NA	NA	NA	NA	NA	NA	NA	NA	NA	0.00376462722232267	NA	NA	NA	NA
A0A024R4D5	NA	NA	NA	NA	0.0031323727959258	NA	NA	NA	NA	NA	NA	NA	NA	NA	NA	NA	NA	NA	NA	NA	NA	NA	NA	NA	NA	NA	NA	NA	NA	NA	NA	NA	NA
A0A024R4E5	NA	0.00168380018792095	0.00145725329682426	0.000755480043464212	0.00236002066288198	0.00143919887661498	NA	0.00167580061657001	0.00168113239677929	NA	0.000694860137961795	0.00161072669817532	0.00197436852412361	0.001565742	0.00137358724248132	NA	0.000860090193488891	0.00100551935203156	0.00178278626857328	0.000391280227434524	NA	NA	0.000432843658233931	0.000603244731212879	NA	NA	NA	0.00125701573604007	NA	NA	NA	NA	0.00196935660069322
A0A024R4K5	NA	NA	NA	NA	NA	NA	NA	NA	NA	NA	NA	NA	NA	NA	NA	NA	NA	NA	NA	NA	NA	NA	NA	NA	NA	NA	NA	NA	NA	NA	NA	0.0407306561777446	NA
A0A024R4M0	NA	0.0199374080180518	0.0200436080687149	0.0157282351838044	0.0313821117331902	0.0213428875976903	NA	0.0159525253189526	0.00264654796962589	NA	NA	NA	0.0180654983031822	0.016089838	0.0182567478201615	0.0100585745214768	0.000870435843563476	NA	0.0141687423114266	0.023311140668207	NA	NA	0.0210827162077375	0.00854700832458281	0.0101419954555163	NA	0.0121055397416908	0.00551258081436613	NA	NA	0.00247453729036902	0.00845354187264168	0.0222357175889952
A0A024R4X0	NA	NA	NA	NA	NA	NA	NA	NA	NA	NA	NA	NA	NA	NA	NA	NA	NA	NA	NA	NA	NA	NA	NA	0.00280878532245049	NA	NA	NA	NA	NA	NA	NA	NA	NA
A0A024R5X3	NA	NA	NA	NA	NA	NA	NA	NA	NA	NA	NA	NA	NA	0.000938086	NA	NA	NA	NA	NA	NA	NA	NA	NA	NA	NA	NA	NA	NA	NA	NA	NA	NA	NA
A0A024R611	NA	NA	NA	NA	NA	NA	NA	NA	NA	NA	NA	NA	NA	0.003076923	NA	NA	NA	NA	NA	NA	NA	NA	NA	NA	NA	NA	NA	NA	NA	NA	NA	NA	NA
A0A024R694	NA	NA	NA	NA	NA	NA	NA	NA	NA	NA	NA	NA	NA	NA	NA	NA	NA	NA	NA	0.0017625481331462	NA	NA	NA	NA	NA	NA	NA	NA	NA	NA	NA	NA	NA
A0A024R6I7	0.00230883432272045	NA	0.00467420524838076	0.00606469786383052	0.00925426863127534	0.0048875198796354	0.00596924167925143	0.00699041291036791	0.0121267740561423	NA	NA	NA	0.00748344546615171	0.003616619	NA	0.00297467694328859	0.0114808701213797	0.00251664829286091	0.00391665834285134	0.00818266696309047	NA	0.007326007	0.00481482583853315	0.0033924386607526	0.00872297878248291	0.00141528781713682	0.00380223385643018	NA	NA	0.00395355342649088	0.00498646070568553	0.00475725202196305	NA
A0A024R7P5	NA	0.0159225415893721	0.030010354119259	NA	NA	NA	NA	NA	0.00516010370723449	NA	0.00308497090550136	NA	NA	0.036850921	0.0159007832188976	NA	NA	NA	NA	0.0263035045689906	NA	NA	0.0300195027155976	NA	NA	NA	NA	0.017527749752328	NA	NA	NA	NA	NA
A0A024R7T3	NA	NA	NA	NA	NA	NA	NA	0.0141869848776209	NA	NA	NA	NA	NA	NA	NA	NA	NA	NA	NA	NA	NA	NA	NA	NA	NA	NA	0.00619233420850986	NA	NA	NA	NA	NA	NA
A0A024R890	NA	NA	NA	NA	NA	NA	NA	NA	NA	NA	NA	NA	NA	NA	NA	NA	NA	NA	0.0105006103133496	NA	NA	NA	NA	NA	NA	NA	NA	NA	NA	NA	NA	NA	NA
A0A024R8A7	NA	NA	NA	NA	NA	NA	NA	NA	NA	NA	NA	0.00332591753446143	NA	NA	NA	NA	NA	NA	NA	NA	NA	NA	NA	NA	NA	NA	NA	NA	NA	NA	NA	NA	NA
A0A024R8S5	NA	NA	NA	NA	NA	NA	NA	NA	NA	NA	NA	NA	NA	NA	NA	NA	NA	NA	NA	NA	NA	NA	NA	NA	NA	NA	NA	NA	NA	NA	0.00253196304653211	NA	NA
A0A024RA52	NA	NA	0.00544752410307137	NA	0.00502226882393316	NA	NA	0.00726957178957446	NA	NA	NA	0.00576728196796821	0.00824753892447088	0.007978723	NA	NA	NA	NA	0.00558543108476432	NA	NA	NA	NA	NA	NA	NA	NA	NA	NA	NA	NA	0.00442933859333172	NA
A0A024RAB6	NA	0.0022200438652178	0.00436887285526348	0.00292253294498924	0.00319529716286912	0.00257554133276453	NA	0.00336801414360419	0.00127801451877626	NA	NA	NA	NA	0.001789298	NA	0.00150548405129628	NA	NA	0.00146703501657292	0.00284392704553948	NA	NA	NA	NA	NA	NA	NA	0.00127454206031012	NA	NA	NA	0.0011325474044701	NA
A0A024RB53	NA	NA	NA	NA	NA	NA	NA	NA	NA	NA	NA	NA	NA	NA	0.00653771843711306	NA	NA	NA	0.00127280102736276	0.00362037891500905	NA	NA	NA	NA	NA	NA	NA	NA	NA	NA	NA	NA	NA
A0A024RBG6	NA	0.00818668355673174	NA	NA	NA	NA	NA	NA	NA	NA	NA	NA	NA	NA	NA	NA	NA	NA	NA	NA	NA	NA	NA	NA	NA	NA	NA	NA	NA	NA	NA	NA	NA
A0A024RCN6	NA	0.00211237065723414	0.00267212979768861	NA	NA	0.00166390363989352	NA	0.00223710046979543	NA	NA	0.000871720843429828	0.00207430819931855	0.002181372502379	0.003843374	0.00229760026343373	0.00111827614611357	NA	NA	0.00251612054120977	0.00111264088692955	NA	0.00120178028943754	NA	NA	NA	NA	0.00158820089479953	0.00210261102967785	NA	NA	NA	NA	0.00395297503196839
A0A024RCR6	NA	NA	NA	NA	NA	0.00319769174355349	NA	NA	NA	NA	NA	0.00217284366391392	0.00414305246214239	0.001920508	NA	NA	NA	NA	NA	NA	NA	NA	NA	NA	NA	NA	NA	NA	NA	NA	NA	NA	NA
A0A024RCW3	NA	NA	NA	NA	NA	NA	NA	NA	NA	NA	NA	0.00407612351069988	NA	NA	NA	NA	NA	NA	NA	NA	NA	NA	NA	NA	NA	NA	NA	NA	NA	NA	NA	NA	NA
A0A024RDE6	NA	NA	NA	NA	NA	NA	NA	NA	NA	NA	NA	NA	NA	NA	NA	0.030999507994184	NA	NA	0.0158724820856831	0.0160690465159935	NA	NA	NA	0.0297370748148242	0.0385306467219108	NA	NA	NA	NA	NA	NA	NA	NA
A0A024RDQ0	NA	NA	NA	NA	NA	NA	NA	NA	NA	NA	NA	NA	NA	NA	NA	NA	NA	NA	NA	NA	NA	NA	NA	0.00126332885253672	NA	NA	NA	NA	NA	NA	NA	NA	NA
A0A059QFL0	NA	NA	NA	NA	NA	NA	NA	NA	NA	NA	NA	NA	NA	NA	NA	NA	NA	NA	NA	NA	NA	NA	NA	NA	NA	NA	NA	NA	0.00307511415872012	NA	NA	NA	NA
A0A059QPR4	NA	NA	NA	NA	NA	NA	NA	NA	NA	NA	NA	NA	NA	NA	NA	NA	NA	NA	NA	NA	NA	NA	NA	NA	NA	NA	0.00710152642356162	NA	NA	NA	NA	NA	NA
A0A059RMK0	NA	NA	NA	NA	NA	NA	NA	NA	NA	NA	NA	NA	NA	NA	NA	NA	NA	NA	NA	NA	NA	NA	NA	NA	NA	NA	NA	0.00564100650038555	NA	NA	NA	NA	NA
A0A060VD08	NA	NA	NA	NA	NA	NA	NA	NA	NA	NA	NA	0.00118886926693338	NA	NA	NA	NA	NA	NA	NA	NA	NA	NA	NA	NA	NA	NA	NA	NA	NA	NA	NA	NA	NA
A0A068ESS8	NA	NA	NA	NA	NA	NA	NA	0.000364447884182692	NA	NA	NA	NA	NA	NA	NA	NA	NA	NA	NA	NA	NA	NA	NA	NA	NA	NA	NA	NA	NA	NA	NA	NA	NA
A0A068LKR4	NA	NA	NA	NA	NA	NA	NA	NA	NA	NA	NA	0.0139916564853932	NA	NA	NA	NA	NA	NA	NA	NA	NA	NA	NA	NA	NA	NA	NA	NA	NA	NA	NA	NA	NA
A0A068LL60	NA	NA	NA	NA	NA	NA	NA	NA	0.0146694368898456	NA	NA	NA	0.00574273155705214	0.008333333	NA	0.0065628814458435	NA	NA	NA	NA	NA	NA	NA	NA	NA	NA	NA	NA	NA	NA	NA	NA	NA
A0A068LN07	NA	NA	NA	NA	NA	NA	0.00900488275911474	0.0155746958195824	NA	NA	NA	NA	NA	NA	0.00921985991524136	NA	NA	NA	NA	NA	NA	NA	NA	NA	NA	NA	NA	0.0210935057954965	NA	NA	NA	NA	0.00793128989136218
A0A068LN13	NA	NA	NA	NA	NA	NA	NA	NA	NA	NA	NA	NA	NA	NA	NA	NA	NA	NA	0.017797645079434	NA	NA	NA	NA	NA	NA	NA	NA	0.0209147479494437	NA	NA	NA	0.0105853680369518	0.00851941478627306
A0A075B6E2	NA	NA	0.0156264657052978	NA	NA	0.0220057118787378	NA	NA	0.00778237757334675	NA	0.0144110153306705	0.0229066694234123	NA	0.042253521	0.0202577196022923	0.0110921936971831	0.0107026768274284	NA	NA	NA	NA	NA	0.0179538766258474	0.0200175400533457	NA	NA	NA	NA	NA	NA	0.0101421157335287	0.0234567786776234	0.0212385410476965
A0A075B6E5	NA	NA	NA	NA	NA	NA	NA	NA	NA	NA	NA	0.0101807413636005	NA	NA	NA	NA	NA	NA	NA	NA	NA	NA	NA	NA	NA	NA	NA	NA	NA	NA	NA	NA	NA
A0A075B6F3	NA	NA	NA	NA	NA	NA	NA	NA	NA	NA	NA	NA	NA	8.19e-05	NA	NA	NA	NA	NA	NA	NA	NA	NA	NA	NA	NA	NA	NA	NA	NA	NA	NA	NA
A0A075B6H7	NA	0.0183658937056624	0.0252872720509548	0.0251133953006936	0.0349698713564818	0.0295490405778283	NA	0.0149978549974557	0.0217324986396851	0.0131318267248693	0.0202110039702674	0.013385790072627	0.025523249297293	0.024691358	0.00665878789635046	0.0129637164232704	NA	NA	0.0064818587366657	0.0409713696954283	NA	NA	0.0377696362928449	0.0233949845760313	0.0364360589499857	NA	NA	0.0365620773044997	NA	NA	NA	NA	NA
A0A075B6K2	NA	NA	NA	NA	NA	NA	NA	NA	0.0112841821552531	NA	NA	NA	NA	NA	NA	NA	NA	NA	NA	NA	NA	NA	NA	NA	NA	NA	NA	NA	NA	NA	NA	NA	NA
A0A075B6Q0	NA	0.00384402417171927	0.00396951364781423	NA	NA	NA	NA	NA	NA	NA	NA	NA	NA	0.007751938	NA	NA	NA	NA	NA	NA	NA	NA	0.00395263636808587	NA	NA	NA	NA	NA	NA	0.0144248505595025	NA	NA	NA
A0A075B6R9	NA	NA	NA	NA	NA	NA	NA	NA	0.0225683643105061	NA	NA	NA	NA	NA	NA	NA	NA	NA	NA	NA	NA	NA	NA	NA	NA	NA	NA	NA	NA	NA	NA	NA	NA
A0A075B6S9	NA	NA	NA	NA	NA	NA	NA	NA	0.0136225610554127	NA	NA	NA	NA	NA	NA	NA	NA	NA	NA	NA	NA	NA	NA	NA	NA	NA	NA	NA	NA	NA	NA	NA	NA
A0A075B716	NA	NA	NA	NA	NA	NA	NA	NA	NA	NA	NA	NA	NA	NA	NA	NA	NA	NA	NA	NA	NA	NA	0.00675351158444944	NA	NA	NA	NA	NA	NA	NA	NA	NA	NA
A0A075B724	0.00958845048206205	0.0136123677275776	0.0271094429113514	0.0478631774525228	0.0111080769060125	0.0140792489007782	0.0371848672063363	0.0250923343157874	NA	0.00834257200947886	0.0112349402930315	0.0355419987212866	0.016822824241635	0.035294118	0.0317271636381802	0.0164715461043038	0.0268196494678791	0.0627089501980324	0.0308841482892815	NA	NA	0.0199142014067544	0.0219952583443982	NA	0.00868035482403488	NA	0.018422194605864	0.0145172950664183	0.020838422194076	NA	NA	NA	0.0215311178298021
A0A075B730	NA	NA	NA	NA	NA	NA	NA	NA	NA	NA	NA	7.55721550886024e-05	NA	NA	NA	NA	NA	NA	NA	NA	NA	NA	NA	NA	NA	NA	NA	NA	NA	NA	NA	NA	3.10866890815995e-05
A0A075B736	0.00644176758437801	0.00217904656332748	NA	0.0012050461212091	NA	0.00422874934282172	NA	0.00160975172651958	0.00217708932494777	0.00150343221981379	0.00260314873561397	0.00574690242382122	0.00243508073439598	0.005104044	0.0037873099389388	0.00266689565451606	0.00559400778938888	0.00418552097222606	0.00572954671100989	0.00461742240090829	NA	0.000897194573387232	0.00317805417342162	0.00223203070890456	0.00325896743956207	0.00117690536788697	NA	0.00591757474043418	0.00423313235841359	NA	NA	NA	0.00321070098949097
A0A075B780	NA	NA	0.00137652486922265	NA	NA	NA	NA	NA	NA	NA	NA	NA	NA	NA	NA	NA	NA	NA	NA	NA	NA	NA	NA	NA	NA	NA	NA	NA	NA	NA	NA	NA	NA
A0A075B7A0	NA	NA	0.0166978455980202	NA	0.0188153110188501	0.0104064010492527	NA	NA	NA	NA	NA	NA	0.020973452629496	0.037439614	0.0234505115507917	0.0228274132681248	NA	NA	NA	0.0240484121903968	NA	NA	0.0246323711406275	NA	NA	0.00241350951475469	NA	0.0309982827818534	NA	NA	NA	NA	NA
A0A075B7B1	NA	NA	NA	NA	NA	NA	NA	NA	NA	NA	NA	NA	NA	0.001267963	NA	NA	NA	NA	NA	NA	NA	0.000476952951841458	NA	NA	NA	NA	NA	NA	NA	NA	NA	NA	NA
A0A075B7B2	NA	NA	NA	NA	NA	NA	NA	NA	NA	NA	NA	NA	NA	0.003571429	NA	NA	NA	NA	NA	NA	NA	NA	NA	NA	NA	NA	NA	NA	NA	NA	NA	NA	NA
A0A075B7B8	NA	NA	0.00291776231728471	NA	NA	NA	NA	NA	NA	NA	NA	NA	NA	NA	NA	NA	NA	NA	NA	NA	NA	NA	NA	NA	NA	NA	NA	NA	NA	NA	NA	NA	NA
A0A075B7C0	NA	NA	NA	0.00516290601142527	NA	NA	NA	0.0092499460585545	0.00446784859341671	NA	NA	NA	0.00262358266674639	0.003807107	NA	NA	NA	NA	NA	NA	NA	NA	NA	NA	NA	NA	NA	NA	NA	NA	NA	NA	NA
A0A075B7C1	NA	NA	NA	NA	0.0304576303784514	NA	NA	NA	NA	NA	NA	NA	0.00666897814889956	0.006451613	0.00695950689736609	NA	NA	NA	NA	NA	NA	0.0182011513501477	NA	NA	NA	NA	NA	NA	NA	NA	NA	NA	NA
A0A075B7D0	NA	NA	NA	NA	NA	NA	NA	NA	NA	NA	NA	NA	NA	NA	NA	NA	NA	NA	NA	NA	NA	NA	NA	NA	NA	NA	NA	0.00843740291050427	NA	NA	NA	NA	NA
A0A075B7D4	NA	NA	NA	NA	NA	NA	NA	NA	0.0488981223793746	NA	NA	NA	NA	NA	NA	NA	NA	NA	0.0350020340278117	NA	NA	NA	NA	NA	NA	NA	NA	0.0109686230926323	NA	NA	NA	NA	NA
A0A075B7D8	NA	NA	NA	NA	NA	0.0150849093655857	NA	NA	NA	NA	NA	NA	NA	0.012605042	NA	NA	NA	NA	NA	NA	NA	NA	NA	NA	0.00413350281246945	NA	NA	NA	NA	NA	NA	NA	0.00779799016858028
A0A075B7D9	NA	NA	0.00245595855580312	NA	NA	NA	NA	NA	NA	NA	0.00294440860739762	0.00195008796023403	NA	0.001798561	NA	0.00188859881857884	NA	NA	NA	0.00265282301556553	NA	NA	0.00146730969354605	NA	NA	NA	NA	0.00118366460398181	NA	NA	NA	NA	NA
A0A075B7E8	NA	NA	0.0328248242772175	NA	NA	NA	NA	NA	NA	NA	NA	NA	NA	NA	NA	NA	NA	NA	NA	NA	NA	NA	NA	NA	NA	NA	NA	NA	NA	NA	NA	NA	NA
A0A075B7F0	NA	NA	0.00441437310367751	0.00125257688841891	NA	NA	NA	NA	NA	NA	NA	NA	NA	NA	NA	NA	NA	NA	NA	0.00596027465411067	NA	NA	NA	NA	NA	NA	NA	NA	NA	NA	NA	NA	NA
A0A075B7F4	NA	NA	NA	NA	NA	NA	NA	NA	NA	NA	0.00535497155683828	NA	0.0064404465094331	NA	NA	NA	NA	NA	NA	NA	NA	NA	NA	NA	NA	NA	NA	NA	NA	NA	NA	NA	NA
A0A076JS26	NA	NA	NA	NA	NA	NA	NA	NA	NA	NA	NA	NA	0.000208132769479939	NA	NA	NA	NA	NA	NA	NA	NA	NA	NA	NA	NA	NA	NA	NA	NA	NA	NA	NA	NA
A0A076JT77	NA	NA	NA	NA	NA	NA	NA	NA	NA	NA	NA	NA	NA	NA	NA	NA	NA	NA	NA	NA	NA	0.000432585970209677	NA	NA	NA	NA	NA	NA	NA	NA	NA	NA	NA
A0A087WSV8	NA	NA	NA	NA	NA	NA	NA	NA	NA	NA	NA	NA	NA	NA	NA	NA	NA	NA	NA	NA	NA	NA	NA	0.00225594458256491	NA	NA	NA	NA	NA	NA	NA	NA	NA
A0A087WSW9	NA	NA	NA	NA	NA	NA	NA	NA	NA	NA	NA	NA	NA	0.003649635	NA	NA	NA	NA	NA	NA	NA	NA	NA	NA	NA	NA	NA	NA	NA	NA	NA	NA	NA
A0A087WSY5	NA	NA	NA	NA	NA	NA	NA	NA	NA	NA	NA	NA	NA	NA	NA	NA	NA	NA	NA	0.00344619020183036	NA	NA	NA	NA	NA	NA	NA	NA	NA	NA	NA	NA	NA
A0A087WSZ2	NA	0.000273663783661807	NA	NA	NA	NA	NA	NA	NA	NA	NA	NA	0.000380313745196252	NA	NA	NA	NA	NA	0.000193168177263348	0.000305250061202712	0	NA	NA	NA	NA	NA	0.000197526299920274	NA	NA	NA	NA	NA	NA
A0A087WT27	NA	NA	NA	NA	NA	NA	NA	0.00654540017690779	NA	NA	NA	NA	NA	NA	NA	NA	NA	NA	NA	0.00238410941915347	NA	NA	NA	NA	NA	NA	NA	NA	NA	NA	NA	NA	NA
A0A087WT47	NA	NA	NA	NA	NA	NA	NA	NA	NA	NA	NA	NA	NA	NA	NA	NA	NA	NA	NA	NA	0	NA	NA	NA	NA	NA	NA	NA	NA	NA	NA	NA	NA
A0A087WT59	NA	NA	NA	0.0207491276192389	0.0194150913476906	0.0051806755569127	NA	NA	0.00786202909340073	0.00690699925284781	NA	NA	NA	NA	NA	NA	NA	NA	NA	0.0167610147245534	NA	NA	0.0165548728286	NA	0.0149056603453887	NA	NA	0.00961535176493535	NA	NA	NA	NA	NA
A0A087WT94	NA	NA	NA	NA	NA	NA	NA	NA	NA	NA	NA	NA	NA	NA	NA	NA	NA	NA	NA	NA	NA	NA	NA	NA	NA	NA	NA	NA	NA	0.00655213325700354	NA	NA	NA
A0A087WT95	NA	NA	NA	NA	NA	NA	NA	NA	NA	NA	NA	NA	0.00176747101610277	NA	NA	0.00226795016712509	NA	NA	NA	NA	NA	0.00365595506762458	NA	NA	NA	NA	NA	NA	NA	NA	NA	NA	NA
A0A087WTA8	0.0113046801212307	0.0138889512474812	0.00448465945572251	0.00397646556351432	0.00528880701554678	0.00568335739403455	0.00733554761424589	0.00747783826634979	0.00460282912087027	0.017566209751571	0.0096348897980821	0.00383798122950404	NA	0.004356678	NA	0.0121044651321224	0.00896064098870656	0.0108659475112007	0.00272206376098034	0.00872826585463714	0	0.0136704898872303	0.00599300745518289	0.0130095556423836	0.0101135575122741	0.0149327252586288	0.00242886096589319	0.00344332547753277	0.0152528185263621	NA	0.00312742774568172	0.00203432182394094	0.0028211625042377
A0A087WTB6	NA	NA	NA	NA	0.0112403158943177	NA	NA	NA	NA	NA	NA	NA	NA	NA	NA	NA	NA	NA	NA	NA	NA	NA	NA	0.00563986240390915	NA	NA	NA	NA	NA	NA	NA	NA	NA
A0A087WTB8	NA	NA	NA	NA	NA	NA	NA	NA	NA	NA	NA	NA	NA	NA	NA	NA	NA	NA	NA	NA	NA	NA	NA	0.00162800145027812	NA	NA	NA	NA	NA	NA	NA	NA	NA
A0A087WTE4	NA	NA	NA	NA	NA	NA	NA	NA	NA	NA	NA	NA	NA	NA	NA	NA	NA	NA	NA	0.000791293010671924	NA	NA	NA	NA	NA	NA	NA	NA	NA	NA	NA	NA	NA
A0A087WTL4	NA	NA	NA	NA	0.00557042197763262	NA	NA	NA	NA	NA	NA	NA	NA	0.006145526	NA	NA	NA	NA	NA	NA	NA	NA	NA	NA	NA	NA	NA	NA	NA	NA	NA	NA	NA
A0A087WTP2	NA	NA	NA	NA	NA	NA	NA	0.0303706567115178	NA	NA	NA	NA	NA	0.022222222	NA	NA	NA	NA	0.0233346893518745	0.0245828215960116	NA	NA	NA	NA	NA	NA	NA	NA	NA	NA	NA	NA	NA
A0A087WTP3	NA	NA	0.007326007	NA	0.0156906569477872	0.00162489642417237	0.00643729912540585	0.00290717070517489	0.00268889892646859	NA	0.00402882281117831	0.00740989317639734	0.00187135805535056	0.005888959	NA	0.001603962975059	NA	NA	NA	NA	NA	0.0045966251302362	0.00474235821931614	0.00566053773324639	NA	NA	NA	NA	NA	NA	NA	0.00233194272281831	0.00645729736128208
A0A087WTS6	NA	NA	NA	NA	NA	NA	NA	NA	NA	NA	NA	NA	NA	NA	NA	NA	NA	NA	NA	NA	NA	NA	NA	NA	NA	NA	0.0604589410768308	NA	NA	NA	NA	NA	0.0773300720329671
A0A087WTS8	NA	NA	0.00107803676709643	NA	NA	NA	NA	NA	NA	NA	NA	NA	0.00108809685373758	0.004210526	NA	NA	NA	NA	NA	NA	NA	NA	NA	0.00249341288217553	NA	NA	NA	NA	NA	NA	NA	NA	NA
A0A087WTT1	NA	0.000677430379534656	0.00139909064921623	NA	0.00279472319598831	NA	NA	0.000894627532577753	NA	NA	NA	NA	0.00151805777267371	0.00102459	NA	NA	NA	NA	NA	0.00113342910439188	NA	NA	0.00104485657557558	0.000728097342096744	NA	NA	NA	0.00202290149643544	NA	NA	0.00196745934718172	0.000853192123277943	NA
A0A087WTT6	NA	0.0374248389748082	NA	NA	0.0356296802321855	NA	NA	NA	NA	NA	NA	0.0409150564279495	0.0390072300386234	0.037735849	NA	NA	NA	NA	NA	NA	NA	NA	NA	NA	NA	NA	NA	NA	NA	NA	NA	NA	NA
A0A087WTT7	NA	NA	NA	NA	NA	NA	NA	NA	NA	NA	NA	NA	NA	NA	NA	NA	NA	NA	NA	NA	NA	NA	NA	NA	NA	0.0086137323542857	NA	NA	NA	NA	NA	NA	NA
A0A087WTV2	NA	NA	NA	NA	NA	NA	NA	NA	NA	NA	NA	NA	NA	NA	NA	NA	NA	NA	NA	0.00325360825260728	NA	NA	NA	0.0111470221853145	NA	NA	NA	NA	NA	NA	NA	NA	NA
A0A087WTZ5	NA	0.00833410246771401	0.00430308655029536	0.00427349827743025	0.00694254783021117	NA	NA	0.00382823437615155	NA	NA	NA	0.00873169679160387	0.00434324234538657	0.004201681	0.00453245225651818	NA	0.012771261747865	0.00746535127045635	0.00661803170127025	0.0116200316860514	NA	0.00474147684783811	0.00428479101037583	NA	0.00413350281246945	NA	NA	NA	NA	NA	NA	0.00349880550632604	NA
A0A087WU08	NA	0.00836503243176775	0.00473862126136235	0.00720612078012559	0.0086008896658244	NA	0.00853094111765766	NA	0.00588955112382146	NA	NA	0.0082184415069136	0.00209249259774479	0.013630229	0.00898936258134957	NA	NA	NA	0.0072625675627919	0.0125029025912743	NA	0.0110410499586924	0.00765523283361034	0.00274914702656701	0.00464670404744414	NA	NA	0.0166527682008965	NA	NA	0.00892820009476704	NA	0.00637112134730441
A0A087WU26	NA	NA	NA	NA	0.0017308912400186	NA	NA	NA	NA	NA	NA	NA	NA	NA	NA	NA	NA	NA	NA	NA	NA	NA	NA	NA	NA	NA	NA	NA	NA	NA	NA	NA	NA
A0A087WU27	NA	NA	0.00379309111488357	NA	NA	NA	NA	NA	NA	NA	NA	NA	NA	NA	NA	NA	NA	NA	NA	NA	NA	NA	0.00377696393521855	NA	NA	NA	NA	NA	NA	NA	NA	NA	NA
A0A087WUC6	NA	NA	NA	NA	NA	NA	0.00903061096847753	NA	NA	NA	NA	NA	NA	NA	0.00616413489626896	NA	NA	NA	NA	NA	NA	NA	0.0058273156109463	NA	NA	NA	NA	NA	NA	NA	NA	NA	NA
A0A087WUI2	0.00658491739557341	0.024658984504618	0.037694475357221	0.0109871103169169	0.0183524254620824	0.00483658758714537	0.0409323968821271	0.0144319385006574	0.0253122973886987	NA	0.011649282377121	0.0441127799507526	0.0408162678612478	0.018007551	0.0230939880229369	0.0441062962830347	0.0087428737173834	0.0120768110153414	0.0191391694511146	0.048731236705661	0.0204493486115562	0.0481424835742944	0.0127571033381302	0.0419581339792359	0.0100632925843321	0.01586020509719	0.0280063661722222	0.0275842636008512	NA	NA	0.0129116711133419	0.032431602209813	0.0230002896031723
A0A087WUI4	NA	NA	NA	0.00346736092437836	NA	NA	NA	NA	NA	NA	0.00558099329619721	NA	NA	NA	NA	NA	NA	NA	NA	NA	NA	NA	NA	NA	NA	NA	NA	NA	NA	NA	NA	NA	NA
A0A087WUK2	NA	NA	0.00282130728000798	NA	NA	NA	NA	NA	NA	NA	NA	NA	NA	NA	NA	NA	NA	NA	NA	NA	NA	NA	0.000936437625860186	NA	NA	NA	NA	NA	NA	NA	NA	NA	NA
A0A087WUL2	NA	NA	0.008457567085333	NA	NA	NA	NA	NA	NA	NA	NA	NA	NA	NA	NA	NA	NA	NA	NA	NA	NA	NA	NA	NA	NA	NA	NA	NA	NA	NA	NA	NA	NA
A0A087WUM5	NA	NA	NA	NA	0.026227403753408	NA	NA	NA	NA	NA	NA	NA	NA	NA	NA	NA	NA	NA	NA	NA	NA	NA	NA	NA	NA	NA	NA	NA	NA	NA	NA	NA	NA
A0A087WUQ1	NA	NA	NA	0.0282525699675534	NA	NA	NA	NA	NA	NA	NA	NA	0.00717841341262358	NA	NA	NA	NA	NA	NA	NA	NA	NA	NA	NA	NA	NA	NA	NA	NA	NA	NA	NA	NA
A0A087WUQ6	NA	NA	NA	NA	0.00552155843645786	NA	NA	NA	NA	NA	NA	NA	NA	0.00877193	NA	NA	NA	NA	0.00614070755837838	0.00646916340323037	NA	NA	0.0129211910681422	NA	NA	NA	0.00959329039491388	NA	NA	NA	NA	NA	0.00814000777777778
A0A087WUS0	NA	0.0230408476376332	0.0140301257235708	0.00770524672463913	0.0401756135622657	0.01953306671751	NA	0.0521132867454023	0.0100018882684329	0.00805816685866708	0.0113686898355936	0.0384689353940931	0.0210131753302076	0.038131313	0.0272404934879711	0.0145841811074368	0.0148715857569546	NA	0.0108529036892404	0.0149552153288304	NA	0.021372564495754	0.0325763108819194	0.00837434123133452	0.00621069156463521	NA	0.0154780996937495	0.0199429510775133	NA	NA	NA	0.0126169035943427	0.0446405421267899
A0A087WUT0	NA	NA	NA	NA	NA	NA	NA	0.00232428460376933	NA	NA	NA	NA	NA	NA	NA	NA	NA	NA	NA	NA	NA	NA	NA	NA	NA	NA	NA	NA	NA	NA	NA	NA	NA
A0A087WUT6	NA	NA	NA	NA	NA	NA	NA	NA	NA	NA	NA	NA	NA	0.001792115	NA	NA	NA	NA	NA	NA	NA	NA	NA	NA	NA	NA	NA	NA	NA	NA	NA	NA	0.000831505831593757
A0A087WUV8	NA	NA	0.0185138952063962	NA	0.00915877549425005	NA	NA	NA	NA	NA	NA	NA	NA	NA	NA	NA	NA	NA	NA	0.00731631645162995	NA	NA	NA	NA	NA	NA	NA	0.0052231536185925	NA	NA	NA	NA	NA
A0A087WUW5	NA	NA	0.00316090926240298	NA	NA	NA	NA	NA	NA	NA	NA	NA	NA	NA	NA	NA	NA	NA	NA	NA	NA	NA	NA	NA	NA	NA	NA	NA	NA	NA	NA	NA	0.00572815396508839
A0A087WUX6	NA	NA	NA	NA	NA	0.00961233869346802	NA	0.0109773461176868	NA	NA	NA	NA	NA	NA	NA	NA	NA	NA	NA	NA	NA	NA	NA	NA	NA	NA	NA	NA	NA	NA	NA	0.00501635898951792	NA
A0A087WUZ2	NA	NA	NA	NA	NA	NA	NA	NA	NA	NA	NA	NA	NA	NA	NA	NA	NA	NA	NA	NA	NA	NA	NA	NA	0.000647219727725543	NA	NA	NA	NA	NA	NA	NA	NA
A0A087WUZ3	NA	NA	0.000488571565406989	0.000199900379144542	0.00167962096738506	0.000229757383281038	NA	0.000869628229962241	0.00030666134477288	NA	0.000351005476430829	0.000782655380219682	0.000404430803859253	0.000587496	0.000786376525389404	NA	NA	NA	0.000525330833122442	0.00154773765892907	NA	0.0007258610174001	0.000437298058064218	NA	0.000632787769121611	NA	NA	0.000423316901441288	NA	NA	NA	NA	0.000729529427914825
A0A087WV01	NA	0.00110195348349359	0.00301372884239583	0.0025957045059725	NA	0.00270096725895945	NA	0.00332179030733359	NA	NA	0.00255795519254492	0.00228305432170862	0.00334992674161375	0.0034375	0.0025282583271349	NA	0.00281440791037911	NA	NA	0.00156056989193052	NA	0.0048489005544577	0.00361172181404174	0.00138176596207132	0.00307429247697934	NA	NA	NA	NA	NA	NA	NA	0.00203758585148169
A0A087WV22	NA	NA	0.0186990853549448	NA	0.0197147563236239	0.0168080921336658	NA	0.0127356887133059	0.00494475432427738	NA	NA	0.0200504843346539	0.018680007284108	0.012406367	0.00909036670377928	0.00412945321085137	NA	NA	0.00884882860898465	0.0127180593145371	NA	0.00475479506732174	0.0152776052904507	0.00532301660599157	0.00552681840039534	NA	0.0100538462667018	0.0124783489970212	NA	NA	0.00809090125078447	0.0173092579224695	0.00912321108432453
A0A087WV25	NA	NA	NA	NA	NA	NA	NA	NA	NA	NA	NA	0.00343116775309501	NA	NA	NA	NA	NA	NA	NA	NA	NA	NA	NA	NA	NA	NA	NA	NA	NA	NA	NA	NA	NA
A0A087WV29	NA	NA	NA	NA	0.00133359643294803	NA	NA	NA	NA	NA	NA	NA	NA	NA	NA	NA	NA	NA	NA	NA	NA	NA	NA	NA	NA	NA	NA	NA	NA	NA	NA	NA	NA
A0A087WV45	NA	NA	NA	0.0215989745229379	NA	NA	NA	NA	NA	NA	NA	NA	NA	NA	NA	NA	NA	NA	NA	NA	NA	NA	NA	0.0221374743018117	NA	NA	NA	NA	NA	NA	NA	NA	NA
A0A087WV46	NA	NA	NA	NA	0.0242099113022515	NA	NA	NA	NA	NA	NA	0.0278012567217057	0.026504913129378	0.025641026	NA	NA	NA	NA	NA	NA	NA	NA	NA	NA	NA	NA	NA	NA	NA	NA	NA	NA	NA
A0A087WV68	NA	NA	0.0048308230679813	NA	NA	NA	NA	NA	NA	NA	NA	NA	NA	NA	NA	NA	NA	NA	NA	NA	NA	NA	NA	NA	NA	NA	NA	NA	NA	NA	NA	NA	NA
A0A087WV97	NA	NA	NA	NA	NA	NA	NA	NA	NA	NA	NA	NA	0.00399108739299983	NA	NA	NA	NA	NA	NA	NA	NA	NA	NA	NA	NA	NA	NA	NA	NA	NA	NA	NA	NA
A0A087WVC1	NA	NA	NA	NA	NA	NA	NA	NA	NA	NA	NA	NA	NA	NA	NA	NA	NA	NA	NA	0.000529801970231107	NA	NA	NA	NA	NA	NA	NA	NA	NA	NA	NA	NA	NA
A0A087WVP1	NA	NA	NA	NA	0.000560197197045135	NA	NA	NA	NA	NA	NA	NA	NA	NA	NA	NA	NA	NA	NA	NA	NA	NA	NA	NA	NA	NA	NA	NA	NA	NA	NA	NA	NA
A0A087WVQ6	NA	0.00198001060328179	0.00349450776824708	0.00201983384606446	0.00392765072204553	0.000865627975055769	0.000222836635933029	0.00263617454745432	0.000916840080667287	NA	0.00017312731870541	0.0039487426857892	0.00461447888582361	0.002355281	0.000887365545689369	0.00258288552170411	NA	NA	0.0036185481161774	0.00416404301556266	NA	0.00232506975052534	0.00247296693874699	0.00561509862555078	0.000390139028724993	NA	0.00194301289432563	0.0031617542290691	NA	NA	NA	0.0026132307370238	0.00236247423101479
A0A087WVQ9	0.00775153293557268	0.00320030662984385	NA	0.00314770502174703	0.00264318125831345	0.00198733355033279	0.0200407568974691	0.0196418922955546	0.0143306045904505	NA	NA	0.00623664360051427	0.00425633162324573	0.010416667	0.00348093519033526	NA	0.00435927253837092	0.00348698673901626	0.00285728642035153	NA	NA	0.00459974761060488	0.00613884927819774	0.00233155199080117	0.0080198935037525	NA	0.00230452241438347	NA	NA	NA	NA	0.00374483467466748	NA
A0A087WVS2	NA	NA	NA	NA	0.00761440735856622	0.0128681303811936	NA	0.0293909588426944	NA	NA	NA	NA	0.0125043336415523	0.016129032	NA	NA	NA	NA	0.00846823398817729	NA	NA	NA	0.00822403358556541	0.0229233111560519	NA	NA	0.0120267783319052	NA	NA	NA	NA	0.0201463459410563	NA
A0A087WVV2	0.000907592949498062	0.00167167197647345	NA	0.00187072604981152	0.00139995008535948	0.00339651988008942	NA	0.00249344400033244	NA	0.00177674533679844	0.00183316984374016	0.00100878851952512	0.00213120744914873	0.002861562	0.00186019188613455	0.0020405825521322	0.00194313213498606	NA	0.000929833243491233	NA	NA	0.00388663832004472	0.00183481501580783	0.00103564914315492	NA	NA	0.00177936343172424	0.00204352952797464	0.00246557020656141	NA	0.00187105846694973	0.00125456106443486	NA
A0A087WVZ1	NA	NA	0.00406402590190825	NA	0.00847484170858044	NA	NA	0.00542333165324814	NA	NA	NA	NA	0.00729235723742417	0.007275132	NA	0.0111117573842579	NA	NA	NA	NA	NA	NA	0.00944240881826619	0.00238724301469809	NA	NA	0.00157811658532822	0.0052231536185925	NA	NA	NA	NA	NA
A0A087WVZ4	NA	NA	0.00731524641860794	NA	NA	NA	NA	NA	NA	NA	NA	NA	NA	NA	0.00770516808097442	0.00500029087541911	NA	NA	NA	0.0131693689491977	NA	NA	NA	NA	NA	NA	0.0255654953037803	0.0070512576318939	NA	NA	NA	0.00297398480528448	NA
A0A087WW13	NA	NA	NA	NA	NA	NA	NA	NA	NA	NA	NA	NA	NA	NA	NA	NA	NA	NA	NA	0.0160322755310825	NA	NA	NA	NA	NA	NA	NA	NA	NA	NA	NA	NA	NA
A0A087WW40	NA	NA	0.00505329580956275	NA	0.00103529202980087	NA	NA	0.000999034562438411	NA	NA	NA	NA	NA	0.002563048	NA	0.00345414846098954	NA	NA	NA	NA	NA	NA	NA	NA	NA	NA	NA	NA	NA	NA	NA	NA	NA
A0A087WW43	NA	NA	NA	NA	NA	NA	NA	NA	0.00093058739647929	NA	NA	NA	NA	NA	NA	NA	NA	NA	NA	NA	NA	NA	NA	NA	NA	NA	NA	NA	NA	NA	NA	NA	NA
A0A087WW46	NA	0.000970409646568081	NA	NA	0.000461930984188371	NA	NA	0.000891506947569439	NA	NA	NA	NA	0.000758579747337711	NA	0.00105550294971093	NA	NA	NA	NA	0.000541207170424629	NA	NA	NA	NA	NA	NA	NA	NA	NA	NA	NA	NA	0.000453992791230284
A0A087WW66	NA	0.00128134172115917	0.000661585778658125	NA	0.00172816254095392	NA	NA	NA	NA	NA	NA	NA	NA	NA	NA	NA	NA	NA	0.000678334175937228	0.000714617099807369	NA	NA	0.00131754579595535	0.000612078244590407	NA	NA	0.000578031366186324	0.00127542163420472	NA	NA	NA	NA	NA
A0A087WW77	NA	NA	NA	NA	0.00850523224034331	NA	NA	NA	NA	NA	NA	NA	NA	NA	NA	NA	NA	NA	NA	NA	NA	NA	NA	NA	NA	NA	NA	NA	NA	NA	NA	NA	NA
A0A087WWA5	NA	NA	NA	0.00236403829353392	NA	NA	NA	NA	NA	NA	NA	NA	NA	NA	NA	NA	NA	NA	NA	0.00249558944335349	NA	NA	NA	NA	NA	NA	NA	NA	NA	NA	NA	NA	NA
A0A087WWB9	NA	NA	NA	NA	0.00386961724131502	NA	NA	NA	NA	NA	NA	NA	NA	NA	NA	NA	NA	NA	NA	NA	NA	NA	NA	NA	NA	NA	NA	NA	NA	NA	NA	NA	NA
A0A087WWH0	NA	0.0132486790737118	0.0132251467743571	NA	0.0240251028406508	0.018270780547327	NA	0.0139102249766119	NA	NA	NA	0.0082767101322596	0.0236723262911349	NA	0.00460741599238062	NA	NA	NA	0.00591637461976604	NA	NA	0.00287142820746094	0.0389229077390152	NA	0.00375486114572156	NA	0.00752165468343979	NA	NA	NA	NA	NA	0.0141673418945092
A0A087WWI4	NA	0.00307999445492202	0.00141988467649179	NA	0.00217882937986839	0.00341865630746811	NA	0.00287798662972925	NA	NA	NA	0.00533145181990236	0.00294270393674945	0.00617883	0.00083751880903291	0.00163052951915177	0.000917741533699837	NA	0.0043480790677584	0.00568968489673564	NA	0.00672404537168525	0.0042158375536623	NA	0.00187130854979382	NA	0.00142802412120064	NA	NA	NA	0.00298174004919727	0.00484888738246237	0.00133286267349311
A0A087WWM0	NA	NA	NA	NA	0.00694254783021117	NA	NA	NA	NA	NA	NA	NA	NA	0.014705882	NA	NA	NA	NA	NA	0.0162680434754904	NA	NA	0.00749838350332256	NA	NA	NA	NA	NA	NA	NA	NA	NA	NA
A0A087WWP4	NA	NA	NA	NA	0.000505995225243497	NA	NA	0.000976548127984339	NA	NA	NA	NA	NA	0.000535906	NA	NA	NA	NA	NA	NA	NA	NA	NA	NA	NA	NA	NA	NA	NA	NA	NA	NA	NA
A0A087WWR3	NA	NA	NA	NA	NA	NA	NA	NA	NA	NA	NA	NA	NA	NA	0.00323941006556206	NA	NA	NA	NA	NA	NA	NA	NA	NA	NA	NA	NA	NA	NA	NA	NA	NA	NA
A0A087WWS1	NA	NA	NA	NA	NA	NA	0.00531212403712965	NA	NA	NA	NA	0.00136670019767294	NA	NA	NA	NA	NA	NA	NA	NA	NA	NA	NA	NA	NA	NA	NA	NA	NA	NA	NA	NA	NA
A0A087WWT3	0.0360695420367915	0.0131670524122361	0.00904637888919927	NA	0.0549980702258494	0.0337171784262225	0.00961773987399122	0.0211262229272115	0.022212457667079	NA	0.0205833890408339	0.0139903900825648	0.0232594078455679	0.025765775	0.00749113530467072	0.0153537571865088	0.0102342096621179	0.0141614381157031	0.0130473926366744	0.0230491750563905	NA	NA	NA	0.0132122896540068	0.023843238515595	0.0103438438761055	0.0033893650466621	0.0177386026673607	0.00829343167841473	0.0129222620370879	NA	NA	NA
A0A087WWU4	NA	NA	NA	NA	NA	NA	NA	NA	NA	NA	NA	0.0123210109348985	NA	NA	NA	NA	NA	NA	NA	NA	NA	NA	NA	NA	NA	NA	NA	NA	NA	NA	NA	NA	NA
A0A087WWU8	NA	0.00398198567617906	0.00385366355101502	0.00472352408098997	0.00823227452452875	0.0072948767015826	0.00232064128810263	0.0244324677100453	0.0113090371684559	0.00187432289866706	0.00706160897511477	0.0070986811867979	0.0249681300334142	0.014035937	0.00758485696439472	0.0171265458240027	0.00490590098361034	0.004625109950579	0.00613330777829056	0.00980941799049893	0.00219849449299841	0.00577517245045421	0.0102919285397456	0.0125219851198141	NA	NA	0.0104025307284054	0.00578952714285655	0.00534432183106816	0.0160532062884132	0.00123043066830077	0.0133408832309001	0.00664289139082531
A0A087WWY0	NA	NA	NA	NA	NA	NA	NA	NA	NA	NA	NA	NA	NA	NA	NA	NA	NA	NA	NA	NA	NA	NA	NA	NA	9.22779629890118e-05	NA	NA	NA	NA	NA	NA	NA	NA
A0A087WWY3	0.00164274107064286	0.00133537270976492	NA	0.00516652075820828	0.00252349711826531	0.000998367554742377	NA	NA	NA	0.00167621075018496	NA	NA	0.00263667126975487	NA	0.00211826355148585	0.00493648076666694	0.00273472583711344	0.00352242231290915	NA	0.00401403974291074	0.000322790681399421	NA	0.0037492871011082	0.00343723157557858	0.00329740544137344	0.00212319301465202	NA	0.00454231801407675	0.00255435313696833	0.00243043277377884	0.00104077426198888	NA	NA
A0A087WWY6	NA	NA	NA	NA	NA	NA	NA	NA	NA	NA	NA	NA	NA	NA	NA	NA	NA	NA	NA	0.00498300497553045	NA	NA	NA	NA	NA	NA	NA	NA	NA	NA	NA	NA	NA
A0A087WX29	NA	NA	0.00494750988268261	NA	NA	NA	NA	NA	NA	NA	NA	NA	NA	0.002415459	0.00521122502878117	NA	NA	NA	NA	NA	NA	NA	NA	NA	NA	NA	NA	NA	NA	NA	NA	NA	NA
A0A087WX58	NA	NA	NA	NA	0.0138850956604223	NA	NA	NA	NA	NA	NA	NA	NA	NA	NA	NA	NA	NA	NA	NA	NA	NA	NA	NA	NA	NA	NA	NA	NA	NA	NA	0.024491636878851	NA
A0A087WX59	NA	NA	NA	NA	0.00694254783021117	NA	NA	NA	0.00647181010781929	NA	0.015046795298414	0.0239172577962724	0.0152013466583156	0.022058824	NA	NA	0.0111748542826786	NA	NA	NA	NA	NA	0.0149967670066451	NA	NA	NA	NA	0.00725864753320913	NA	NA	NA	NA	NA
A0A087WXC5	NA	NA	NA	NA	NA	NA	NA	0.00282080384558128	NA	NA	NA	NA	NA	NA	NA	NA	NA	NA	NA	NA	NA	NA	NA	NA	NA	NA	NA	NA	NA	NA	NA	NA	NA
A0A087WXM6	NA	NA	NA	NA	0.0216159920318274	NA	NA	NA	NA	NA	NA	0.0181777445293655	0.0183495546868123	0.00443787	NA	0.0113911943756116	NA	NA	NA	0.026182887109912	NA	NA	0.00508597009193882	NA	NA	NA	NA	NA	NA	NA	NA	0.00689823639294297	0.00686361616291334
A0A087WXU3	NA	NA	NA	NA	NA	NA	NA	NA	NA	NA	NA	NA	NA	0.000816993	NA	NA	NA	NA	NA	NA	NA	NA	NA	NA	NA	NA	NA	NA	NA	NA	NA	NA	NA
A0A087WXX9	NA	NA	NA	NA	0.00227514868010531	NA	NA	NA	NA	NA	NA	NA	NA	NA	NA	NA	NA	NA	NA	NA	NA	NA	NA	NA	NA	NA	NA	NA	NA	NA	NA	NA	NA
A0A087WY00	NA	0.000412986972177323	NA	NA	NA	NA	NA	NA	NA	NA	NA	NA	NA	NA	NA	NA	NA	NA	NA	NA	NA	NA	NA	NA	NA	NA	NA	NA	NA	NA	NA	NA	NA
A0A087WY39	NA	NA	0.00124590572852367	NA	NA	NA	NA	NA	NA	NA	NA	NA	NA	NA	NA	NA	NA	NA	NA	NA	NA	NA	NA	NA	NA	NA	NA	NA	NA	NA	NA	NA	NA
A0A087WY55	NA	NA	NA	NA	0.0187897821035177	0.0119078222271458	NA	0.0385299378094729	0.0153262767564435	NA	0.0162894663018655	NA	0.0128568607229142	0.012437811	NA	NA	NA	NA	NA	0.0110072339302025	NA	NA	NA	NA	NA	NA	NA	NA	NA	NA	NA	0.0124285916128259	NA
A0A087WY61	NA	NA	NA	NA	0.000638477813672841	NA	NA	NA	NA	NA	NA	0.000504818743244873	0.000380593875619195	NA	NA	NA	NA	NA	NA	0.000271533368991427	NA	NA	0.000100142413766991	NA	NA	NA	NA	NA	NA	NA	NA	NA	NA
A0A087WY93	NA	NA	NA	NA	0.0256572425559374	NA	NA	NA	NA	NA	NA	NA	NA	NA	NA	NA	NA	NA	NA	NA	NA	NA	NA	NA	NA	NA	NA	NA	NA	NA	NA	NA	0.0100865309733503
A0A087WYB4	NA	NA	NA	NA	0.00609152607569028	NA	NA	0.00538834192300747	NA	NA	NA	NA	0.00500173387009757	NA	NA	NA	NA	NA	NA	NA	NA	NA	NA	NA	NA	NA	NA	NA	NA	NA	NA	NA	NA
A0A087WYD6	NA	NA	NA	NA	NA	NA	NA	NA	NA	NA	NA	NA	0.00348435419911187	NA	NA	NA	NA	NA	NA	NA	NA	NA	NA	NA	NA	NA	NA	NA	NA	NA	NA	NA	NA
A0A087WYR3	NA	NA	0.00695743532446357	NA	0.0079109829561814	0.00867200087437724	NA	NA	0.00876977177626836	NA	0.011121544706891	0.00294632846611725	0.0154491948926659	0.016757246	0.00586262842705971	0.00190228426400023	NA	NA	0.00285342639600034	NA	NA	NA	0.00831342547666507	0.00514943991574205	NA	NA	0.00486300210127974	NA	NA	NA	NA	0.00452562883428969	NA
A0A087WYS1	NA	NA	0.00172504911154794	NA	NA	NA	NA	NA	NA	NA	NA	NA	0.00329901536305003	NA	NA	NA	NA	NA	NA	NA	NA	NA	NA	NA	NA	NA	NA	NA	NA	NA	NA	NA	NA
A0A087WYS6	NA	NA	NA	NA	NA	NA	NA	NA	NA	NA	NA	NA	NA	NA	NA	NA	NA	NA	NA	0.00246925681625294	NA	NA	NA	NA	NA	NA	NA	NA	NA	NA	NA	NA	NA
A0A087WYV9	NA	NA	NA	NA	NA	NA	NA	0.00500615180470306	NA	NA	NA	NA	NA	NA	NA	NA	NA	NA	NA	NA	NA	NA	NA	NA	NA	NA	NA	NA	NA	NA	NA	NA	NA
A0A087WYX9	NA	NA	NA	NA	NA	NA	NA	NA	NA	NA	NA	NA	NA	NA	NA	NA	0.0010744288407936	NA	NA	0.00117309287286314	NA	NA	NA	NA	NA	NA	NA	NA	NA	NA	NA	NA	NA
A0A087WYY5	NA	NA	NA	NA	0.00202325670990734	NA	NA	NA	NA	NA	NA	NA	NA	NA	NA	NA	NA	NA	NA	NA	NA	NA	NA	NA	NA	NA	NA	NA	NA	NA	NA	NA	NA
A0A087WYZ1	NA	NA	NA	NA	0.00601392716173548	NA	NA	0.00580331048401528	NA	NA	0.0026068330096369	0.0207181334237653	0.0131680463425227	0.00955414	NA	NA	NA	NA	NA	NA	NA	NA	NA	NA	NA	NA	NA	NA	NA	NA	NA	NA	NA
A0A087WZ13	NA	NA	NA	NA	NA	NA	0.0021327347526288	0.00553311520052021	NA	NA	NA	NA	NA	NA	NA	NA	NA	NA	NA	NA	NA	NA	NA	NA	NA	NA	NA	NA	NA	NA	NA	NA	NA
A0A087WZ99	NA	NA	NA	NA	NA	NA	0.0445170939640748	NA	NA	NA	NA	NA	NA	NA	NA	NA	NA	NA	NA	NA	NA	NA	NA	NA	NA	NA	NA	NA	NA	NA	NA	NA	NA
A0A087WZE9	NA	NA	NA	NA	NA	NA	NA	NA	NA	NA	NA	NA	NA	NA	NA	NA	0.00259791522800843	NA	NA	NA	NA	NA	NA	NA	NA	NA	NA	NA	NA	NA	NA	NA	NA
A0A087WZM5	NA	NA	NA	NA	0.00496940287606803	NA	NA	NA	NA	NA	NA	NA	0.0217619288052187	NA	NA	NA	NA	NA	0.0221065484702354	NA	NA	NA	0.00536726421748525	NA	NA	NA	NA	NA	NA	NA	NA	NA	NA
A0A087WZP6	NA	0.00137362680837912	0.0035461722823315	NA	NA	0.00185794164055467	NA	NA	0.00426673325817787	NA	0.00170057936183488	NA	NA	0.002556831	NA	NA	NA	0.000820292788737666	NA	0.00114912757150597	NA	0.00156298028724299	NA	NA	NA	NA	0.00123932494753897	0.00102545976408549	NA	NA	NA	0.0049401646752341	NA
A0A087WZY5	NA	NA	NA	0.000803390186180508	NA	NA	NA	NA	NA	NA	NA	NA	NA	NA	NA	NA	NA	NA	NA	NA	NA	NA	NA	NA	NA	NA	NA	NA	NA	NA	NA	NA	NA
A0A087X027	NA	NA	0.00541870086116616	NA	NA	0.00422129128316858	NA	NA	0.00232848231145419	NA	NA	NA	NA	0.00617284	NA	0.00555587816709843	NA	0.0188016255973719	NA	0.00585305249756777	NA	NA	0.00539566203618351	0.0100264223672263	NA	NA	NA	NA	NA	NA	0.00169333347579289	NA	NA
A0A087X054	NA	NA	NA	NA	0.00394571584287751	NA	NA	0.00177542791242961	0.00184585021932373	NA	NA	0.00289757520996863	0.00114346447677844	0.002673304	NA	NA	NA	NA	NA	NA	NA	NA	0.00205873732815551	0.00275629589049851	NA	NA	0.00123726781999021	NA	NA	NA	0.00106208029190002	NA	NA
A0A087X059	NA	NA	0.00821498239006571	NA	NA	NA	NA	NA	NA	NA	NA	NA	NA	NA	NA	NA	NA	NA	NA	NA	NA	NA	NA	NA	NA	NA	NA	NA	NA	NA	NA	NA	NA
A0A087X0A8	NA	NA	NA	NA	NA	NA	NA	NA	NA	NA	NA	0.00227145936293506	NA	NA	NA	NA	0.00113708228407166	NA	NA	NA	NA	NA	NA	NA	NA	NA	NA	NA	NA	NA	NA	0.00077773892591867	NA
A0A087X0I0	NA	NA	NA	0.000645363505701287	NA	NA	NA	NA	NA	NA	NA	NA	NA	NA	NA	NA	NA	NA	NA	0.00131025174401681	NA	NA	NA	NA	NA	NA	NA	NA	NA	NA	NA	NA	NA
A0A087X0K0	NA	NA	0.000773515488518269	0.00623275816192775	NA	NA	NA	NA	NA	NA	NA	NA	NA	NA	NA	0.000793097446173889	NA	NA	NA	NA	NA	NA	NA	NA	NA	NA	NA	NA	NA	NA	NA	NA	NA
A0A087X0K9	NA	NA	NA	NA	0.000609127775463353	0.00029505290297854	NA	0.000336952113560529	NA	NA	0.000302716193669551	NA	NA	0.001109467	NA	NA	NA	NA	NA	NA	NA	NA	NA	NA	NA	NA	NA	NA	NA	NA	NA	NA	NA
A0A087X0Q4	NA	0.0145846795664391	0.0100405349426443	0.0160256177775441	0.0694254801904847	0.0351981218530333	NA	0.0669940965714936	0.0226513358174506	NA	NA	0.0159448378080156	0.0304026943503228	0.014705882	0.0317271636381802	0.0154420736196102	NA	0.017419152569564	0.0154420736196102	0.0488041315326981	NA	0.0663806702273766	0.0524886855430381	0.0209006668343389	0.0434017760877216	0.0440820402263456	0.00657935515246625	0.0435518861864308	0.0781440823421521	0.0273647902509158	NA	0.0122458180230677	0.0272929669819723
A0A087X0S5	NA	0.0113417828709806	0.0154118009652899	0.0165147853692854	0.00556787645075429	0.0140390577140979	0.0027387310116752	0.0176315649660933	0.0277993601238141	0.00684099378035942	NA	0.0259728919751162	0.0124407068226469	NA	NA	0.00415916678785505	NA	0.00545310674294681	NA	0.0148187898861664	NA	NA	NA	0.0022851606487449	NA	NA	NA	NA	NA	NA	0.00598273147083149	NA	0.00531271052424102
A0A087X0T3	NA	NA	NA	NA	NA	NA	NA	NA	NA	NA	NA	NA	NA	NA	NA	NA	NA	NA	NA	NA	0.00199327787191478	NA	NA	NA	NA	NA	NA	NA	NA	NA	NA	NA	NA
A0A087X0W0	NA	0.066117215951923	NA	NA	NA	NA	NA	NA	NA	NA	NA	0.144566532567522	NA	NA	NA	NA	NA	NA	NA	NA	NA	NA	NA	NA	NA	NA	NA	NA	NA	NA	NA	0.111028752462932	NA
A0A087X0W8	NA	NA	NA	NA	0.00563693425338071	NA	NA	0.00407964054897758	NA	NA	NA	0.00107885485820713	0.00308564694562838	0.004477612	NA	NA	NA	NA	NA	0.00660433991563072	NA	NA	NA	NA	NA	NA	NA	NA	NA	NA	NA	0.00186428878355967	0.00277003278836584
A0A087X0X3	NA	0.00308383057577237	0.0027270490112747	0.00386954371332749	0.0111300896707162	0.00506616705565291	0.00987854932408696	0.0290683550423341	0.029549114678048	0.00344232356203748	0.0114223569633517	0.018387043618744	0.00890943853037909	0.018126633	0.00321056068286301	0.00323227266519052	0.00539536948422066	0.0019166705821059	NA	0.00439571238899893	NA	0.0041857667483961	0.00281294737414538	0.00276559936232668	0.00228830853269208	NA	0.00237302592498726	0.00267715047454355	NA	NA	0.00233038866674958	0.00691403300873913	NA
A0A087X0Y1	NA	NA	NA	NA	0.00504912620970986	NA	NA	NA	NA	NA	NA	0.00579812343068694	NA	NA	NA	NA	NA	NA	NA	NA	NA	NA	NA	NA	NA	NA	NA	NA	NA	NA	NA	NA	NA
A0A087X106	NA	NA	NA	NA	NA	NA	NA	NA	NA	NA	NA	NA	NA	NA	NA	NA	NA	NA	NA	0.000928822467864862	NA	NA	NA	NA	NA	NA	NA	NA	NA	NA	NA	NA	NA
A0A087X122	NA	NA	NA	NA	0.026227403753408	NA	NA	NA	NA	NA	NA	0.030118027934473	NA	NA	NA	NA	NA	NA	NA	NA	NA	NA	NA	NA	NA	NA	NA	NA	NA	NA	NA	NA	NA
A0A087X142	NA	NA	NA	NA	NA	NA	0.00610765881348046	NA	0.00510241233376541	NA	NA	NA	NA	0.005797101	NA	NA	NA	NA	NA	NA	NA	NA	NA	NA	NA	NA	NA	NA	NA	NA	NA	NA	NA
A0A087X178	NA	NA	NA	NA	NA	NA	NA	NA	NA	NA	NA	0.0024982690736146	0.00714533321411802	0.002304147	NA	NA	NA	NA	NA	NA	NA	NA	NA	NA	NA	NA	NA	NA	NA	NA	NA	NA	NA
A0A087X1A5	NA	NA	0.00222637934479372	NA	NA	NA	NA	NA	NA	NA	NA	NA	NA	0.001086957	NA	NA	NA	NA	NA	NA	NA	NA	NA	NA	NA	NA	NA	NA	NA	NA	NA	NA	NA
A0A087X1A9	NA	NA	NA	NA	NA	NA	NA	NA	NA	NA	NA	0.0120472109569394	NA	NA	0.0179787262414227	0.0291683622148736	NA	NA	NA	0.0245828215960116	NA	0.0271669040329672	0.0226617815717509	0.0280739818702363	NA	NA	0.0198842736280556	NA	NA	NA	NA	NA	NA
A0A087X1B7	NA	NA	NA	NA	NA	NA	NA	NA	NA	NA	NA	NA	NA	NA	NA	NA	NA	NA	NA	0.00485187282897953	NA	NA	NA	NA	NA	NA	NA	NA	NA	NA	NA	NA	NA
A0A087X1E4	NA	NA	NA	NA	0.00286117126705252	NA	NA	NA	NA	NA	NA	NA	NA	NA	NA	NA	NA	NA	NA	0.00670440588982135	NA	NA	NA	NA	NA	NA	NA	NA	NA	NA	NA	NA	NA
A0A087X1I2	NA	NA	NA	NA	NA	NA	NA	0.0112022915518818	0.0072144767405008	NA	NA	0.00888728652266864	0.0169457642844093	0.016393443	NA	NA	NA	NA	NA	NA	NA	NA	NA	NA	NA	NA	NA	NA	NA	NA	NA	NA	NA
A0A087X1I3	NA	NA	0.000699545324608114	0.00104210281553318	NA	NA	NA	NA	NA	NA	NA	NA	0.00211822014791681	NA	0.000736832910051313	0.00107588203209549	NA	NA	NA	NA	NA	0.00231244102706819	NA	0.00388318424535451	NA	NA	NA	0.00101145074821772	NA	NA	NA	NA	NA
A0A087X1J7	NA	0.0108984421462837	0.0112542254957356	0.0186280676410475	NA	0.00657547312909078	NA	NA	NA	NA	NA	NA	NA	NA	NA	NA	NA	NA	0.0057695655869751	NA	NA	NA	NA	NA	0.00810802387727497	NA	NA	0.00542404395254296	NA	NA	NA	NA	NA
A0A087X1N7	NA	NA	NA	NA	NA	NA	NA	NA	NA	NA	NA	NA	NA	0	NA	NA	NA	NA	NA	NA	NA	NA	NA	NA	NA	NA	NA	NA	NA	NA	NA	NA	NA
A0A087X1R1	NA	NA	NA	NA	NA	NA	NA	NA	NA	NA	NA	0.00123350237689353	NA	NA	NA	NA	NA	NA	NA	NA	NA	NA	NA	NA	NA	NA	NA	NA	NA	NA	NA	NA	NA
A0A087X1T7	NA	0.00275870842436463	0.0137097365047538	0.00360658664979738	0.0016279078712701	0.0108005899788016	0.00496597110336385	0.00365495125177891	0.012227454506946	NA	0.0022580572515883	NA	NA	NA	NA	NA	NA	0.00980277842720738	NA	NA	NA	NA	NA	NA	0.00282693539616838	NA	NA	NA	0.00366468885947415	NA	NA	0.0063554390265452	NA
A0A087X1U0	NA	0.00215599611844541	NA	NA	NA	NA	NA	NA	NA	NA	NA	NA	NA	NA	NA	0.00456548265362496	NA	NA	NA	NA	NA	NA	NA	NA	NA	NA	NA	NA	NA	NA	NA	NA	NA
A0A087X1X7	NA	0.00291693551658452	0.00744781653556578	0.000664766579527819	0.00305431311894554	0.00292014070777766	NA	0.00406430822649002	0.00258872369106124	NA	NA	NA	0.00418034392021647	0.008395404	0.00193888261187229	NA	NA	NA	NA	NA	NA	NA	0.00137259760924249	0.00184751563158017	NA	NA	0.00259832299941966	0.00564561463836531	NA	NA	NA	0.00515425836585292	NA
A0A087X1Z3	NA	NA	NA	NA	NA	NA	NA	NA	NA	NA	0.00241696561360581	NA	NA	0.005905512	NA	NA	NA	NA	NA	0.00907338433630295	NA	NA	NA	0.00373030278187662	NA	NA	NA	NA	NA	NA	NA	NA	NA
A0A087X208	NA	0.00105957069534992	0.000364719905610144	NA	NA	0.00146798117871667	NA	NA	0.000940348439590573	NA	NA	NA	NA	0.001424501	NA	NA	NA	NA	0.000249302339876452	0.000492444685019155	NA	NA	NA	NA	NA	NA	NA	NA	NA	NA	NA	NA	NA
A0A087X225	NA	NA	NA	NA	NA	NA	NA	NA	NA	NA	NA	NA	NA	NA	NA	NA	NA	NA	NA	NA	NA	NA	NA	NA	NA	NA	NA	NA	NA	NA	NA	NA	0.00724969428208945
A0A087X232	NA	0.00197168677642114	NA	NA	NA	0.00237919682264069	NA	NA	0.00262474977362101	NA	NA	NA	NA	NA	NA	NA	NA	NA	NA	0.00329888722924365	NA	NA	NA	NA	NA	NA	NA	NA	NA	NA	NA	NA	NA
A0A087X243	NA	NA	NA	NA	0.0273677252041626	NA	NA	NA	NA	NA	NA	NA	NA	NA	NA	NA	NA	NA	NA	NA	NA	NA	NA	NA	NA	NA	NA	NA	NA	NA	NA	0.0120683430029621	NA
A0A087X271	NA	0.00831082292667981	0.00715177713907471	NA	NA	NA	NA	NA	NA	NA	NA	NA	0.00384987581754683	NA	NA	NA	NA	NA	NA	NA	NA	NA	NA	NA	NA	NA	NA	NA	NA	NA	NA	NA	NA
A0A087X2B5	NA	NA	NA	NA	NA	NA	NA	NA	NA	NA	NA	NA	NA	0.006329114	NA	NA	NA	NA	NA	NA	NA	NA	NA	NA	NA	NA	NA	NA	NA	NA	NA	NA	NA
A0A087X2D0	NA	0.0264717420239894	0.071971758957579	0.0196281014761533	0.0175309482481957	0.0104976856888904	NA	0.0400413132074954	NA	0.016794915585026	0.0157964955400669	0.0232067331648249	0.0172541000162832	0.033216374	0.0239716342694146	0.0379495742438675	0.0239965291644933	0.041561487476847	0.0457482725174891	0.0282794870299872	NA	0.0415752618733123	0.0280290457892362	0.0388972405829395	0.0319294934508122	NA	0.0222913177675487	0.0441631406843692	NA	NA	0.0235819029464012	0.0102263326937835	NA
A0A087X2E9	NA	0.00941542638817551	NA	0.0118017068283802	NA	0.0151485589741723	NA	NA	NA	NA	NA	NA	NA	0.03164557	0.0204820930225742	NA	NA	NA	0.00664595597427654	0.0490100556855617	NA	NA	0.0129086100400501	0.0239872629783981	NA	NA	0.011326485227189	NA	NA	NA	NA	NA	0.011746340243582
A0A087X2G1	NA	NA	0.00327723046108097	NA	0.00226604766616607	NA	NA	0.00218668730509615	NA	NA	NA	NA	0.00548545708902354	0.0012	NA	NA	NA	NA	NA	0.0026549447589187	NA	NA	NA	0.00227399250306423	NA	NA	0.000715833857768341	NA	NA	NA	NA	NA	NA
A0A087X2I1	NA	NA	NA	NA	0.00468578907110332	NA	NA	NA	NA	NA	NA	NA	0.00512998295291699	0.00248139	NA	NA	NA	NA	NA	0.00274498057305553	NA	NA	NA	NA	NA	NA	NA	NA	NA	NA	NA	NA	NA
A0A088AWL3	NA	NA	NA	NA	0.000594506102897416	NA	NA	NA	NA	NA	NA	NA	NA	NA	NA	NA	NA	NA	NA	NA	NA	NA	NA	NA	NA	NA	NA	NA	NA	NA	NA	NA	NA
A0A089PAU6	NA	NA	NA	NA	NA	NA	NA	NA	NA	NA	NA	NA	NA	NA	NA	NA	NA	NA	NA	NA	NA	NA	NA	NA	NA	NA	0.000506614411781421	NA	NA	NA	NA	NA	NA
A0A090KJ24	NA	NA	NA	NA	NA	NA	NA	NA	NA	NA	NA	NA	0.00764167574006717	NA	NA	NA	NA	NA	NA	NA	NA	NA	NA	NA	NA	NA	NA	0.0036160299598127	NA	NA	NA	NA	NA
A0A090N8G0	NA	NA	NA	NA	NA	NA	NA	NA	NA	NA	0.00119495715829039	NA	NA	NA	0.00157477889361118	NA	NA	NA	NA	NA	NA	NA	NA	NA	NA	NA	NA	NA	NA	NA	NA	NA	NA
A0A096LNX8	NA	NA	NA	NA	0.00330135102620528	NA	NA	NA	NA	NA	NA	NA	NA	0.004895105	NA	NA	NA	NA	NA	NA	NA	NA	NA	NA	NA	NA	NA	NA	NA	NA	NA	NA	NA
A0A096LNY4	NA	NA	NA	NA	NA	NA	NA	NA	NA	NA	NA	NA	NA	0.006097561	NA	NA	NA	NA	NA	NA	NA	NA	NA	NA	NA	NA	NA	NA	NA	NA	NA	NA	NA
A0A096LNY6	NA	NA	NA	NA	NA	NA	NA	NA	NA	NA	NA	NA	NA	NA	NA	NA	NA	NA	NA	0.0030728529760582	NA	NA	NA	NA	NA	NA	NA	NA	NA	NA	NA	NA	NA
A0A096LNZ9	NA	NA	NA	NA	NA	0.00805882917596916	NA	NA	NA	NA	NA	NA	0.0104413291640115	0.01010101	NA	NA	NA	NA	NA	NA	NA	NA	0.0103008098053413	0.00957067542224034	NA	NA	NA	NA	NA	NA	NA	0.0546732497415341	NA
A0A096LP07	NA	NA	NA	NA	0.00238430986130369	NA	NA	NA	NA	NA	NA	NA	NA	NA	NA	NA	NA	NA	NA	NA	NA	NA	NA	NA	NA	NA	NA	NA	NA	NA	NA	NA	NA
A0A096LP62	NA	NA	NA	0.0013648588161371	NA	NA	NA	NA	NA	NA	NA	NA	NA	NA	NA	NA	NA	NA	NA	NA	NA	NA	NA	NA	NA	NA	NA	NA	NA	NA	NA	NA	NA
A0A096LP69	NA	NA	NA	NA	0.0257505414034726	NA	NA	NA	NA	NA	NA	NA	NA	0.090909091	NA	NA	NA	NA	NA	NA	NA	NA	0.0185414576496144	NA	NA	NA	NA	NA	NA	NA	NA	NA	NA
A0A096LPE1	NA	NA	NA	NA	0.0248470134361536	NA	NA	0.0319691123758671	0.00772075625781348	NA	NA	NA	0.10880964195871	0.064327485	NA	NA	NA	NA	0.0276331845377332	0.0194074913159181	NA	NA	NA	NA	NA	NA	NA	NA	NA	NA	NA	0.0516186305821437	NA
A0A096LPJ3	NA	NA	NA	NA	NA	NA	NA	NA	NA	NA	NA	NA	NA	0.0025	NA	NA	NA	NA	NA	NA	NA	NA	NA	NA	NA	NA	NA	NA	NA	NA	NA	NA	NA
A0A097PEB8	NA	NA	NA	NA	NA	NA	NA	NA	NA	NA	NA	0.000104521603307622	NA	NA	NA	NA	NA	NA	NA	NA	NA	NA	NA	NA	NA	NA	NA	NA	NA	NA	NA	NA	NA
A0A0A0MQS9	NA	NA	0.00170248333155436	NA	NA	NA	NA	NA	0.00085232389851607	NA	NA	NA	NA	0.001506348	NA	NA	NA	NA	NA	NA	NA	NA	NA	NA	NA	NA	NA	0.000637299164673575	NA	NA	NA	0.000537582901025316	NA
A0A0A0MQT7	0.00300744680428277	0.00561578042216736	0.0285165422925069	0.0103998695798318	NA	NA	NA	NA	0.0175832288413322	0.00359792688429522	0.00390143254986127	NA	0.00190717960397289	NA	NA	NA	NA	NA	NA	0.0115819177415831	NA	NA	NA	NA	NA	NA	NA	NA	NA	NA	NA	NA	NA
A0A0A0MQU1	NA	NA	NA	NA	NA	NA	NA	0.00141258906565559	NA	NA	NA	NA	NA	0.001421189	NA	NA	NA	NA	NA	NA	NA	NA	NA	NA	NA	NA	NA	NA	NA	NA	NA	0.00129103234427883	NA
A0A0A0MR02	NA	NA	0.0148733233247678	NA	NA	NA	NA	NA	NA	NA	NA	NA	NA	NA	NA	NA	NA	NA	NA	NA	NA	NA	NA	0.00982880578623192	NA	NA	NA	NA	NA	NA	NA	0.00518287713715931	NA
A0A0A0MR13	NA	NA	0.00648186412264188	NA	0.0119517283404992	NA	NA	NA	0.00557067219208486	NA	NA	NA	NA	NA	NA	NA	NA	NA	NA	NA	NA	0.00238074175866	NA	NA	NA	NA	NA	NA	NA	NA	NA	NA	NA
A0A0A0MR45	NA	NA	NA	NA	NA	NA	NA	NA	NA	NA	NA	NA	NA	0.001445922	NA	NA	NA	NA	NA	NA	NA	NA	NA	NA	NA	NA	NA	NA	NA	NA	NA	NA	NA
A0A0A0MR85	NA	NA	NA	NA	0.0043311308950582	NA	NA	NA	NA	NA	NA	NA	NA	NA	NA	NA	NA	NA	NA	NA	NA	NA	NA	NA	NA	NA	NA	NA	NA	NA	NA	NA	NA
A0A0A0MRA3	NA	0	NA	0	NA	0	0	1.81312822380889e-05	NA	NA	NA	0	0	0	2.68602164674812e-05	0	NA	NA	0	0	NA	NA	NA	1.26017084544809e-05	NA	NA	NA	NA	NA	NA	NA	1.10751180858652e-05	NA
A0A0A0MRA5	NA	NA	NA	NA	NA	NA	NA	0.00152106788950228	NA	NA	NA	NA	NA	NA	NA	0.00175302333870112	NA	NA	NA	0.000923395318286839	NA	NA	NA	NA	NA	NA	NA	NA	NA	NA	NA	NA	NA
A0A0A0MRC3	NA	NA	NA	NA	NA	NA	NA	NA	NA	NA	NA	NA	NA	NA	0	NA	NA	NA	NA	NA	NA	NA	NA	NA	NA	NA	NA	NA	NA	NA	NA	NA	NA
A0A0A0MRG2	NA	NA	NA	NA	NA	0.00324318766265065	NA	NA	NA	NA	NA	NA	NA	NA	NA	NA	NA	NA	NA	NA	NA	NA	NA	0.00505524261879325	NA	NA	NA	NA	0.00360013330362045	NA	NA	NA	NA
A0A0A0MRJ6	NA	0.0138513715444664	NA	NA	NA	NA	NA	NA	NA	NA	NA	NA	0.0115496264189489	NA	NA	NA	NA	NA	NA	NA	NA	NA	NA	NA	NA	NA	NA	NA	NA	NA	NA	NA	NA
A0A0A0MRL0	NA	0.00661172189271977	NA	NA	0.00755349222055356	NA	NA	0.0258150581592341	NA	NA	0.0109139418820098	NA	NA	NA	NA	0.00700040722558675	NA	NA	NA	NA	NA	NA	NA	NA	NA	NA	NA	NA	NA	NA	NA	NA	NA
A0A0A0MRM8	NA	NA	NA	NA	NA	NA	NA	0.00119674207288926	NA	NA	NA	NA	NA	NA	NA	NA	NA	NA	NA	0.000968675401150197	NA	NA	NA	NA	NA	NA	NA	NA	NA	NA	NA	NA	NA
A0A0A0MRM9	NA	NA	NA	NA	NA	NA	NA	NA	NA	NA	NA	NA	0.00219002450105069	NA	NA	NA	NA	NA	NA	NA	NA	NA	NA	NA	NA	NA	NA	NA	NA	NA	NA	NA	NA
A0A0A0MRN5	NA	NA	NA	NA	0.00339635413042276	NA	NA	NA	0.00386963571695403	NA	NA	NA	NA	0.001199041	NA	NA	NA	NA	NA	NA	NA	NA	NA	NA	NA	NA	NA	NA	NA	NA	NA	NA	NA
A0A0A0MRQ5	0.0145671298458438	NA	NA	NA	NA	0.0278735796580743	NA	0.0234865332043323	0.0231334222065397	NA	0.00527413444293423	0.0285655525136597	NA	NA	NA	NA	0.00626713462882202	NA	0.0129303045313143	NA	NA	0.0159057400850036	0.0241184855514153	NA	NA	0.0199581060636384	0.0143257414015908	NA	0.0473062248918129	NA	0.0234020493685059	NA	NA
A0A0A0MRT6	NA	NA	NA	NA	NA	NA	NA	NA	NA	NA	NA	NA	NA	0.003412969	NA	NA	NA	NA	NA	NA	NA	NA	NA	NA	NA	NA	NA	NA	NA	NA	NA	NA	NA
A0A0A0MRV8	NA	NA	NA	NA	NA	NA	NA	NA	NA	NA	NA	NA	NA	0.018181818	NA	NA	NA	NA	NA	NA	NA	NA	NA	NA	NA	NA	NA	NA	NA	NA	NA	NA	NA
A0A0A0MRX2	NA	NA	NA	NA	NA	NA	NA	0.00391038457372517	0.00377753688655923	NA	NA	NA	0.00443644411459023	0.004291845	NA	NA	NA	NA	0.00450669918702979	NA	NA	NA	NA	NA	NA	NA	NA	NA	NA	NA	NA	NA	NA
A0A0A0MS07	0.00534758108913684	0.0143997593013425	0.0284215138746152	0.048172602421589	0.0244853881077216	0.0193437957158248	0.0410605164111836	0.0175409058215437	0.0257386842204198	0.00705330283865076	0.00937308206094305	0.0156491262420768	0.0231334184125808	0.033805419	0.0297578912263753	0.0218739515513065	0.0057068160039912	0.0338209372095577	0.0137863426357064	NA	NA	0.00579638658433598	0.029428903142495	0.0358671057777376	0.0175628544621105	NA	0.00710764859263018	0.0213097309228012	NA	0.00711679289146276	0.00900201222434698	0.0195151291619823	0.00906072869519225
A0A0A0MS08	NA	0.00260076497499976	0.00852450758990413	0.00511213478747639	0.00220090068413685	0.00209219635826711	0.00184190800470526	NA	0.00623316712649067	0.00123971773279233	NA	0.000947770238722807	0.00180715340284204	0.003496503	NA	0.00351856130477369	NA	NA	NA	NA	NA	NA	0.00430851211716436	0.00373361523095609	0.00125754991327452	NA	NA	0.00230110943596658	NA	0.00195189401917827	0.00289080513391883	0.00204371402370714	0.00129784699809595
A0A0A0MS09	NA	NA	NA	NA	NA	NA	NA	NA	NA	NA	NA	NA	NA	NA	NA	NA	NA	NA	NA	NA	NA	NA	NA	NA	NA	0.00315202798474234	NA	NA	NA	NA	NA	NA	NA
A0A0A0MS15	NA	NA	NA	NA	0.0079343402425004	NA	NA	NA	NA	NA	NA	NA	NA	NA	NA	NA	NA	NA	NA	NA	NA	NA	NA	NA	NA	NA	NA	NA	NA	NA	NA	NA	NA
A0A0A0MS41	NA	NA	NA	NA	NA	NA	NA	NA	NA	NA	NA	0.00280409234569913	0.00267334044548721	NA	NA	NA	NA	NA	NA	NA	NA	NA	NA	NA	NA	NA	NA	NA	NA	NA	NA	NA	NA
A0A0A0MS51	NA	0.0086582378196786	0.00432315856273496	0.00760247054352589	0.010480484618816	0.00982846445423798	0.00525549036939472	0.00989993065991693	0.00575200843257196	NA	NA	0.00463180220589448	0.00887703746725313	0.008435965	0.00396305989507325	0.00627237156091437	0.00187296895139336	0.000868913058880109	0.00652656823525788	0.00449786360105229	0	0.00196472513404243	0.00363569684609533	0.00332235515930504	0.000865998185670504	NA	0.00374083231248778	0.00353390480668245	0.00181908119091162	NA	NA	0.00680359076538498	0.00267639689696946
A0A0A0MS98	0.00465724756329146	0.0100570136333636	0.00292609877227008	NA	NA	NA	NA	0.00455559855228365	NA	NA	NA	NA	NA	NA	0.0197646124130621	NA	NA	NA	0.0116292474116594	NA	NA	0.0305007019563446	NA	NA	NA	NA	NA	0.0238679138454265	0.0101215197562691	0.034430972948448	0.0133629190203297	0.0277727163889123	0.0200333648616941
A0A0A0MSA3	NA	NA	NA	NA	NA	NA	NA	NA	NA	NA	NA	NA	NA	0.001628664	NA	NA	NA	NA	NA	NA	NA	NA	NA	NA	NA	NA	NA	NA	NA	NA	NA	NA	NA
A0A0A0MSA7	NA	NA	NA	NA	NA	NA	NA	NA	NA	NA	NA	NA	NA	0.000771605	NA	NA	NA	NA	NA	0.000426784582450147	NA	NA	NA	NA	NA	NA	NA	NA	NA	NA	NA	NA	NA
A0A0A0MSE2	NA	NA	0.00731524641860794	NA	NA	NA	NA	0.00615548103009957	NA	NA	NA	NA	NA	NA	NA	NA	NA	NA	NA	NA	NA	NA	0.00364207251178648	0.00772661152178044	NA	NA	NA	NA	NA	NA	NA	NA	NA
A0A0A0MSI0	NA	0.01660985583147	0.0268046369233769	0.0211286150059044	0.031195401679923	0.0239434734266649	NA	0.0249046637000669	0.0226400881736347	0.00518361544855857	NA	0.0189545688184795	0.0392831305955487	0.046935926	0.0313388565995624	0.0325829674775451	NA	0.0101915794960201	0.0115975639201609	0.035927739056328	NA	0.0223576952031237	0.0220648777175699	0.0302117101100387	0.00988122658931702	NA	0.00979995073485928	0.0306046364449193	NA	NA	NA	0.016369357617167	0.0353409516643425
A0A0A0MSK3	NA	NA	NA	NA	NA	NA	NA	NA	NA	NA	NA	NA	0.00446840792617042	NA	NA	NA	NA	NA	NA	NA	NA	NA	NA	NA	NA	NA	NA	0.00142244374337381	NA	NA	NA	NA	NA
A0A0A0MSK5	NA	NA	0.00121056079800091	NA	NA	NA	NA	NA	NA	NA	NA	NA	0.00244371516031051	0.002364066	NA	0.00124120679105196	NA	NA	NA	0.00261519359851579	NA	NA	NA	NA	NA	NA	NA	NA	NA	NA	NA	NA	NA
A0A0A0MSL1	NA	NA	NA	NA	NA	NA	NA	NA	NA	NA	0.000511591038508983	NA	NA	NA	NA	NA	NA	NA	NA	NA	NA	NA	NA	NA	NA	NA	NA	NA	NA	NA	NA	NA	NA
A0A0A0MSL3	NA	NA	NA	NA	NA	NA	NA	NA	NA	NA	NA	NA	0.010035840893648	NA	NA	NA	NA	NA	NA	NA	NA	NA	NA	NA	NA	NA	NA	NA	NA	NA	NA	NA	NA
A0A0A0MSM0	NA	NA	NA	NA	0.000662122132696229	NA	NA	NA	NA	NA	NA	0.000380171310055549	NA	0.001285647	NA	NA	NA	NA	NA	NA	NA	NA	NA	NA	NA	NA	NA	NA	NA	NA	NA	NA	NA
A0A0A0MSQ0	0.00412667555128202	0.00669541438659758	NA	0.00102690135086833	0.00404402643250107	NA	NA	0.00260869153250811	NA	NA	0.00160941383877258	0.00437065432948099	0.00250221486889202	0.001356239	0.00243834456155267	0.0014241337230767	NA	NA	0.000553829489512873	0.00413143918769616	NA	0.00102031757414817	0.00399552220381455	0.00235589223805584	NA	NA	0.000809034531257456	NA	NA	NA	NA	0.00150581469073651	NA
A0A0A0MSR2	NA	NA	NA	NA	NA	NA	NA	NA	NA	NA	NA	NA	NA	NA	NA	NA	NA	NA	NA	NA	NA	0.00175774316647356	NA	NA	NA	NA	NA	0.00307531511643337	NA	0.00311583543929426	NA	NA	NA
A0A0A0MSV6	NA	NA	0.00887977883044117	NA	0.00545772576207502	NA	NA	NA	NA	NA	NA	NA	NA	NA	NA	0.0151742923057043	NA	NA	NA	0.00959156317962491	NA	0.00978443385842888	NA	0.0109537214525915	NA	NA	NA	NA	NA	NA	NA	NA	NA
A0A0A0MSW0	NA	NA	NA	NA	NA	NA	NA	NA	NA	NA	NA	NA	0.000414803899040908	0.000802568	NA	NA	NA	NA	NA	NA	NA	NA	NA	NA	NA	NA	NA	NA	NA	NA	NA	NA	NA
A0A0A0MSW3	NA	NA	NA	NA	0.000712056381393254	NA	NA	NA	NA	NA	NA	NA	NA	NA	NA	NA	NA	NA	NA	NA	NA	NA	NA	NA	NA	NA	NA	NA	NA	NA	NA	NA	NA
A0A0A0MSX9	NA	NA	0.0010030701202992	0.000498086475967603	NA	NA	NA	NA	NA	NA	NA	NA	NA	NA	NA	NA	NA	NA	NA	NA	NA	NA	0.000998805342165295	NA	NA	NA	NA	NA	NA	NA	NA	NA	NA
A0A0A0MSZ4	NA	NA	NA	NA	NA	NA	NA	0.00235309876461252	NA	NA	NA	NA	NA	NA	NA	NA	NA	NA	NA	NA	NA	NA	NA	NA	NA	NA	NA	NA	NA	NA	NA	NA	NA
A0A0A0MT01	NA	NA	NA	NA	NA	NA	NA	NA	NA	NA	0.00787867634326427	NA	NA	NA	NA	NA	NA	NA	NA	NA	NA	NA	NA	NA	NA	NA	NA	NA	NA	NA	NA	NA	NA
A0A0A0MT12	NA	NA	0.0119085409434427	NA	0.00823418461387402	NA	NA	NA	NA	NA	NA	NA	NA	NA	0.00209054898596446	NA	NA	NA	NA	NA	NA	NA	NA	0.00330522157329132	NA	NA	NA	NA	NA	NA	NA	NA	NA
A0A0A0MT20	NA	NA	NA	NA	NA	NA	NA	NA	NA	NA	NA	NA	NA	NA	NA	NA	NA	NA	NA	NA	NA	NA	NA	NA	NA	NA	NA	NA	NA	NA	NA	0.00357388647979175	NA
A0A0A0MT26	NA	NA	NA	NA	0.00113359223337263	NA	0.000640079288239109	NA	NA	NA	NA	NA	0.000732669233752919	0.000354394	NA	NA	NA	NA	0.000478460308927775	NA	NA	NA	NA	NA	NA	NA	0.000271808379340894	NA	NA	NA	NA	NA	NA
A0A0A0MT33	NA	NA	0.000405919813178527	NA	NA	NA	NA	NA	NA	NA	NA	NA	NA	NA	NA	NA	NA	NA	NA	NA	NA	NA	NA	NA	NA	NA	NA	NA	NA	NA	NA	NA	NA
A0A0A0MT44	NA	NA	NA	0.00627834933371966	NA	NA	NA	NA	NA	NA	NA	NA	NA	NA	NA	NA	NA	NA	NA	NA	NA	0.00696587340766922	NA	NA	0.00202422533325916	NA	NA	NA	NA	NA	NA	NA	NA
A0A0A0MTE2	NA	NA	NA	NA	NA	NA	NA	NA	NA	NA	NA	NA	NA	0.00077821	NA	NA	NA	NA	NA	NA	NA	NA	NA	NA	NA	NA	NA	NA	NA	NA	NA	NA	NA
A0A0A0MTH3	NA	NA	NA	NA	NA	NA	NA	NA	NA	NA	NA	NA	NA	0.007022472	0.00303012259416761	NA	NA	0.00332725422094554	NA	NA	NA	0.00475479506732174	NA	NA	NA	NA	NA	NA	NA	NA	NA	0.00350863321637486	NA
A0A0A0MTI5	NA	NA	NA	NA	0.00990405402280235	NA	NA	NA	NA	NA	NA	NA	NA	NA	NA	NA	NA	NA	0.0146861682851052	NA	NA	NA	0.00356566446195038	NA	NA	NA	NA	NA	NA	NA	NA	NA	NA
A0A0A0MTN3	NA	0.00233905286981974	0.0048308230679813	NA	0.00445370991099987	NA	NA	NA	NA	NA	NA	0.00255719150110578	NA	0.011006289	0.00508831850333317	NA	NA	NA	0.00247655949185422	0.00260902638308622	NA	NA	NA	NA	NA	NA	0.00422071838281246	NA	NA	NA	NA	0.0039279038784799	0.00218858735578361
A0A0A0MTS2	NA	NA	0.00845101364854536	NA	NA	NA	NA	0.00323718464214029	0.000932379414853914	NA	NA	NA	0.00383254287683871	0.002443684	NA	NA	NA	NA	0.00222470550367163	0.00429678582860067	NA	NA	0.00283180310969071	0.00692555976270102	NA	NA	0.00142180978852289	0.00383437060547443	NA	NA	NA	0.000882114003079317	NA
A0A0A0MTS7	NA	NA	NA	NA	NA	NA	NA	NA	NA	NA	NA	NA	NA	NA	NA	NA	NA	NA	NA	NA	1.32749414428333e-05	NA	NA	NA	NA	NA	NA	NA	NA	NA	NA	NA	5.64200207809329e-06
A0A0A1EDG2	NA	NA	NA	NA	NA	NA	NA	NA	NA	NA	NA	NA	NA	NA	NA	NA	NA	NA	NA	NA	NA	0.000216291856633437	NA	NA	NA	NA	NA	NA	NA	NA	NA	NA	NA
A0A0A6YYJ5	NA	NA	NA	NA	NA	NA	NA	NA	NA	NA	NA	NA	NA	0.00036075	NA	NA	NA	NA	NA	NA	NA	NA	NA	NA	NA	NA	NA	NA	NA	NA	NA	NA	NA
A0A0A7C3R6	NA	NA	NA	NA	NA	NA	NA	NA	NA	NA	NA	NA	NA	NA	NA	NA	NA	NA	NA	NA	NA	0.000890664109385219	NA	NA	NA	NA	NA	NA	NA	NA	NA	NA	NA
A0A0A7C3Y6	NA	NA	NA	NA	NA	NA	NA	NA	NA	NA	NA	0.000229779468682239	NA	NA	NA	NA	NA	NA	NA	NA	NA	NA	NA	NA	NA	NA	NA	NA	NA	NA	NA	NA	NA
A0A0A7E6D4	NA	NA	NA	NA	NA	NA	NA	NA	NA	NA	NA	NA	0.00128889248025793	NA	NA	NA	NA	NA	NA	NA	NA	NA	NA	NA	NA	NA	NA	NA	NA	NA	NA	NA	NA
A0A0A8WFP6	NA	NA	NA	NA	NA	NA	NA	NA	NA	NA	NA	NA	0.00128090617897508	NA	NA	NA	NA	NA	NA	0.00102809195862781	NA	NA	NA	NA	NA	NA	NA	NA	NA	NA	NA	NA	NA
A0A0B4J1R6	NA	0.00387405560281271	0.00889005704447474	0.00264867875229955	0.0109417452305698	0.00415533356947107	NA	0.0181050766129768	0.00878638139254906	NA	NA	0.00644714078503445	0.0129660102860852	0.010199653	0.00702294015717146	0.00410180090365219	NA	0.000771160813557058	0.00592482341082416	0.0123622878670261	NA	0.00293872798491938	0.00374007950585461	0.00709388921524972	NA	NA	0.0160292917642311	0.00599846592345417	NA	NA	NA	0.00628709472265202	0.00753162642507698
A0A0B4J1V1	NA	NA	0.0180729622822791	NA	NA	NA	NA	NA	NA	NA	NA	NA	NA	NA	NA	NA	NA	NA	NA	NA	NA	NA	NA	NA	NA	NA	NA	NA	NA	NA	NA	NA	NA
A0A0B4J1Y8	NA	NA	NA	0.0139327739797844	NA	NA	NA	NA	NA	NA	NA	NA	NA	NA	NA	NA	NA	NA	NA	0.0303075882690554	NA	NA	NA	NA	NA	NA	NA	NA	NA	NA	NA	NA	NA
A0A0B4J1Z1	NA	0.0337825185927849	0.0396909969264162	NA	0.0214468504572787	NA	NA	0.0107833249975845	NA	NA	NA	0.0105523015681221	NA	0.02406926	0.01827868366361	0.0274651002183864	0.0221865713113067	0.0151305055907799	0.029381269439404	0.0403732471467344	NA	0.0240246347897829	0.0297746035249282	0.00787659648730755	NA	NA	0.0154574827838534	0.0175337843597553	NA	NA	NA	NA	NA
A0A0B4J207	NA	NA	NA	NA	NA	NA	NA	0.00331316291479528	NA	NA	NA	NA	NA	NA	0.00392263149375726	NA	NA	NA	NA	NA	NA	NA	NA	NA	NA	NA	NA	NA	NA	NA	NA	NA	NA
A0A0B4J210	NA	NA	NA	NA	NA	NA	NA	NA	NA	NA	NA	NA	NA	0.00203252	NA	NA	NA	NA	NA	NA	NA	NA	NA	NA	NA	NA	NA	NA	NA	NA	NA	NA	NA
A0A0B4J231	NA	0.00139291848955311	0.00732894524193526	NA	0.00265220956989007	0.00597621069597932	NA	NA	0.00593370466103314	0.00358543185923123	NA	NA	NA	NA	NA	0.013273242913477	NA	NA	0.00221220767727668	0.00932213717303587	NA	0.00140882770834772	NA	0.00177433855283157	0.0120899143900629	NA	NA	0.00485269111208999	NA	0.00174232728795738	NA	NA	NA
A0A0B4J239	NA	0.0206616295510817	0.0746764756915305	NA	NA	0.0332426709492409	NA	NA	NA	NA	NA	NA	NA	0.052083333	NA	0.0437525433223104	NA	NA	NA	NA	NA	NA	0.0424908412118681	NA	NA	NA	NA	0.0822646736883302	NA	NA	NA	NA	NA
A0A0B4J259	NA	0.00361955556351267	NA	0.0148480657010841	NA	NA	NA	NA	NA	NA	NA	NA	NA	NA	NA	0.00574850976317477	0.00924440521963783	NA	0.00766467898419234	NA	NA	0.00823701744875904	0.0111654763218481	NA	NA	NA	NA	0.0180141620134472	NA	NA	NA	NA	NA
A0A0B4J269	NA	0.00425515556424018	0.00758456102482343	0.0047687460482005	0.0050945708514683	0.00942228582416838	0.00671064501953139	0.00493711261976291	0.0030465764642817	0.00338750904542703	0.00477919426027381	0.00784698322179767	0.0135051445430992	0.0118854	0.0063937077640759	0.00329026543582909	0.0146994544439763	0.00542268161421929	0.015234431401091	0.00868039388195289	NA	0.00812183324430951	NA	0.0129640994797443	0.00731041959931152	0.00282857125328991	0.0135358715322904	0.00628774602999067	NA	NA	0.00371832419237236	0.00453405758205398	0.00672564694104313
A0A0B4J278	NA	NA	NA	NA	NA	NA	NA	NA	NA	NA	NA	0.0301942755766867	NA	NA	0.0273094573634322	NA	NA	NA	NA	NA	NA	NA	NA	NA	NA	NA	NA	0.0413406018770826	NA	NA	NA	NA	0.011746340243582
A0A0B4J296	NA	NA	NA	NA	NA	NA	NA	NA	NA	NA	NA	NA	NA	NA	NA	NA	NA	NA	NA	NA	NA	NA	NA	NA	NA	NA	0.0135574592918561	NA	NA	NA	NA	NA	NA
A0A0B4J2A4	NA	NA	NA	NA	NA	NA	NA	NA	NA	NA	NA	NA	NA	NA	NA	NA	NA	NA	NA	NA	NA	NA	NA	0.00240481434426864	NA	NA	NA	NA	NA	NA	NA	NA	NA
A0A0B4J2B4	NA	NA	0.0101256241350282	0.00646457083568786	NA	0.00920277330010921	0.00446428471721555	NA	0.00745903531883131	NA	NA	NA	NA	0.017655367	NA	NA	0.00643974619232772	NA	0.0222470560867773	NA	NA	0.00478165832904075	0.0165642262524194	NA	NA	NA	0.0173325388856842	0.0125488481773606	NA	NA	NA	NA	NA
A0A0B4J2B5	NA	0.0151799725290073	NA	NA	0.00687265064576175	NA	NA	0.0170447564943342	0.0238745855153588	NA	NA	NA	NA	NA	NA	0.00803618112652937	NA	NA	NA	0.0112880308439486	NA	0.0287875356671835	0.00780443993122225	NA	NA	NA	NA	0.0209858858327122	NA	NA	0.0073478593383704	NA	NA
A0A0B4J2C3	NA	NA	NA	NA	0.0110155098030361	0.00531882757526928	NA	0.00303706539781586	NA	NA	NA	NA	NA	0.006666667	NA	NA	NA	NA	NA	NA	NA	NA	NA	0.0126332913678579	NA	NA	0.00596528244633361	NA	NA	NA	NA	NA	NA
A0A0B4J2D9	NA	NA	NA	NA	NA	NA	NA	NA	0.0249566961629415	NA	NA	NA	0.0126059951427905	NA	NA	NA	NA	NA	NA	NA	NA	NA	NA	0.011554840000814	NA	NA	NA	0.0329058692778969	NA	NA	NA	NA	NA
A0A0B4J2H0	NA	NA	NA	NA	NA	NA	NA	NA	NA	NA	NA	NA	NA	NA	NA	NA	NA	NA	NA	0.0082730645134507	NA	NA	NA	NA	NA	NA	NA	NA	NA	NA	NA	NA	NA
A0A0B7MGD5	NA	NA	NA	NA	NA	NA	NA	0.000299447692918999	NA	NA	NA	0.000153667357593147	0.000213904903360793	0.000670302	NA	0.000363157307321008	NA	NA	NA	NA	NA	0.000173078172774259	NA	NA	NA	NA	NA	NA	NA	NA	NA	NA	NA
A0A0C4DFM1	NA	NA	NA	NA	NA	NA	NA	NA	NA	NA	NA	NA	NA	0.002506266	NA	NA	NA	NA	NA	NA	NA	0.00141412475310761	NA	NA	NA	NA	NA	NA	NA	NA	NA	NA	NA
A0A0C4DFM8	NA	NA	NA	NA	NA	NA	NA	NA	NA	NA	NA	0	NA	NA	NA	NA	NA	NA	NA	NA	NA	NA	NA	NA	NA	NA	NA	NA	NA	NA	NA	NA	NA
A0A0C4DFS1	NA	NA	NA	NA	0.000362114417053338	0.00081241151217775	0.0013853660920617	0.00104829698294339	NA	NA	NA	NA	NA	NA	NA	NA	NA	NA	NA	NA	NA	NA	NA	NA	NA	NA	NA	NA	0.000388180000207445	NA	NA	0.000699556919388917	NA
A0A0C4DFS5	NA	NA	NA	NA	NA	NA	NA	NA	NA	NA	NA	NA	NA	NA	NA	NA	NA	NA	NA	NA	NA	NA	NA	NA	NA	NA	NA	NA	0.00108800183116632	NA	NA	NA	NA
A0A0C4DFS8	NA	NA	NA	NA	NA	NA	NA	NA	NA	NA	NA	0.00329559000576726	0.00314192008250872	NA	NA	NA	NA	NA	NA	0.00336239240165001	NA	NA	NA	NA	NA	NA	NA	NA	NA	NA	NA	NA	NA
A0A0C4DFV9	NA	NA	NA	NA	0.0240338384544038	NA	NA	0.00759266395009952	NA	NA	NA	0.0267229049550332	0.0197589725062726	0.011471861	NA	NA	NA	NA	0.0136977657874692	NA	NA	NA	0.0101978018092659	NA	NA	NA	0.0112978831906096	NA	NA	NA	NA	0.030448794673853	0.00843600780752582
A0A0C4DFZ2	NA	0.00379984035062207	NA	NA	0.00361757325708611	0.00611359440973107	NA	0.00349088045879871	NA	NA	NA	NA	0.00990126044979341	0.007662835	NA	NA	NA	0.0022691619142522	NA	NA	NA	NA	NA	NA	NA	NA	NA	NA	NA	NA	NA	NA	NA
A0A0C4DG17	NA	0.00914008752485593	0.0371867278970786	0.00855012004596085	0.0268392573953764	0.0150869517952725	NA	0.0232678216511963	0.00665915172226025	NA	0.00583393290963833	0.0195974514920022	0.0301709272561559	0.028115427	0.0187278393404003	0.00824761826561588	0.0208611801611531	0.00649398230721025	0.0176983975109964	0.0274515602065502	NA	0.00441913914816664	0.0188474834841086	0.0127112779407505	0.00604071516330002	0.00584323319391396	0.0196322661080129	0.0180404988843045	0.00561073438786019	NA	NA	0.0203280245097406	0.0196533314796128
A0A0C4DG44	NA	NA	NA	NA	NA	NA	NA	NA	NA	NA	NA	NA	0.00287136577852607	NA	NA	NA	NA	NA	NA	0.00102428432535273	NA	NA	NA	NA	NA	NA	NA	NA	NA	NA	NA	NA	NA
A0A0C4DG79	NA	NA	0.00121631131332559	NA	0.00186893603128185	NA	NA	NA	NA	NA	NA	NA	0.00184149367140505	0.003562945	NA	NA	NA	NA	NA	NA	NA	NA	NA	NA	NA	NA	NA	NA	NA	NA	NA	NA	NA
A0A0C4DGA1	NA	NA	NA	0.00706314198334211	NA	NA	NA	NA	NA	NA	NA	NA	NA	NA	NA	NA	NA	NA	NA	NA	NA	NA	NA	NA	NA	NA	NA	NA	NA	NA	NA	NA	NA
A0A0C4DGB5	NA	NA	NA	NA	NA	NA	NA	NA	NA	NA	NA	NA	NA	NA	NA	NA	NA	NA	NA	NA	NA	NA	NA	NA	NA	NA	NA	NA	NA	NA	NA	0.00130111819617778	NA
A0A0C4DGB6	0.0249347426963963	0.00537036786356839	0.00729222694702241	0.00692431597527979	NA	0.00771083745289815	0.00665832783311338	0.00392827167588085	NA	0.00600766804220617	0.00495857526783395	0.00309976596292304	0.00614071109165094	0.006161205	0.0049610172581306	0.0064444272110817	0.00727698801104118	0.00686187927761203	0.0077898809111415	0.0115068381162549	NA	0.00845438812405256	0.00417713587601595	0.0109602184386721	0.0195956671550597	0.00251962380212903	0.00203698577358881	0.0148492152569088	0.0105347631685199	0.00642986250445249	0.00270695649539265	0.0045590190662451	NA
A0A0C4DGC5	NA	0.0240259729928821	0.0349198368631134	0.0388204225464517	0.0206810528671092	0.0265455017216058	0.0172443491825443	0.0164545021678302	0.00545961106116801	0.00465927326797233	0.0233182802450477	0.0117473922558001	0.0363441665549993	0.017609868	0.0148984548680038	0.0206127442477907	0.00870197238079923	0.0104023605141597	0.00317055847825691	0.0328955288596209	NA	0.0100361890573342	0.0350588943477725	0.0100795778894823	0.00875405815782138	0.00715234277533	0.015712455645652	0.0139819810634175	0.0152853177125226	NA	NA	0.017222747094053	0.0169974295263764
A0A0C4DGF0	NA	NA	NA	NA	NA	NA	NA	NA	NA	NA	NA	NA	NA	NA	0.00797086416439769	NA	NA	NA	NA	NA	NA	NA	NA	NA	NA	NA	NA	NA	NA	NA	NA	NA	NA
A0A0C4DGG8	NA	NA	NA	NA	NA	NA	NA	NA	NA	NA	0.00391648642312402	NA	0.00494589281630502	NA	NA	NA	NA	NA	NA	NA	NA	NA	NA	NA	NA	NA	NA	NA	NA	NA	NA	NA	NA
A0A0C4DGG9	NA	NA	0.000634925508857231	NA	0.000195119922668285	NA	NA	NA	NA	NA	NA	NA	NA	NA	NA	NA	NA	NA	NA	0.000257182286342489	NA	NA	NA	NA	NA	NA	NA	NA	NA	NA	NA	NA	NA
A0A0C4DGH0	NA	NA	NA	NA	NA	NA	NA	NA	NA	NA	NA	NA	NA	0.008230453	NA	0.00432123845773644	NA	NA	NA	NA	NA	NA	NA	NA	NA	NA	NA	NA	NA	NA	NA	NA	NA
A0A0C4DGH5	NA	NA	NA	NA	0.00289669062003314	NA	NA	0.00364031866922898	NA	NA	NA	0.00232073847984721	0.00442504973211017	NA	0.00169320224397329	0.00269707440855663	NA	NA	0.000899024452831865	0.00189422454337271	NA	NA	0.00130964963801443	0.00169002743828983	NA	NA	0.00114913435542177	NA	NA	NA	NA	0.0013070596223088	NA
A0A0C4DGI3	NA	NA	0.00219771381960445	NA	NA	NA	NA	0.00391038457372517	NA	NA	NA	NA	NA	NA	NA	NA	NA	NA	NA	0.00534122450335454	NA	NA	0.00437673847060889	NA	NA	NA	NA	NA	NA	NA	NA	0.00714777379229914	NA
A0A0C4DGK8	NA	NA	NA	NA	NA	NA	NA	NA	NA	NA	NA	NA	NA	NA	NA	NA	NA	NA	NA	NA	NA	NA	0.0034923983548517	NA	NA	NA	NA	NA	NA	NA	NA	NA	NA
A0A0C4DGL3	NA	NA	NA	NA	0.0133927165490929	NA	NA	0.0269243409399969	0.0156057832137439	NA	NA	0.00768970965204062	NA	NA	NA	NA	NA	NA	0.00744724179637278	NA	NA	NA	NA	NA	NA	NA	NA	NA	NA	NA	NA	NA	NA
A0A0C4DGL8	NA	NA	NA	NA	NA	NA	NA	NA	NA	NA	NA	NA	NA	NA	NA	NA	NA	NA	NA	NA	NA	NA	NA	NA	NA	NA	NA	NA	NA	NA	0.00452886928377622	NA	NA
A0A0C4DGP4	NA	NA	0.00616948465989875	NA	0.0385827227367436	0.00921182461448286	NA	0.0114347355012938	NA	NA	NA	NA	NA	NA	NA	NA	NA	NA	NA	NA	NA	0.00679802005748513	NA	NA	NA	NA	NA	NA	NA	NA	NA	NA	NA
A0A0C4DGP7	NA	NA	0.00208157389273634	NA	0.00191907800101494	NA	NA	0.00191359830540067	NA	NA	NA	0.00220375777131544	0.00420199872549405	NA	NA	NA	NA	NA	NA	NA	NA	0.00917456390253057	NA	NA	NA	NA	NA	NA	NA	NA	NA	NA	NA
A0A0C4DGQ5	NA	NA	NA	0.00651982336923887	0.00403498490231307	NA	NA	0.00584051059067352	NA	NA	NA	0.00926708593531823	0.00662622776549869	0.00534188	NA	NA	NA	NA	NA	NA	NA	NA	NA	NA	0.00420416038321315	NA	NA	0.00421870096166409	NA	NA	NA	NA	NA
A0A0C4DGQ8	NA	NA	NA	NA	0.00406976967817524	NA	NA	NA	NA	NA	NA	NA	NA	NA	NA	NA	NA	NA	NA	NA	NA	NA	NA	NA	NA	NA	NA	NA	NA	NA	NA	NA	NA
A0A0C4DGS1	NA	0.0040489650602921	0.00500097687352063	0.00146555097469593	0.00413818543396291	0.00473252978372432	NA	0.00218808769609113	NA	NA	NA	0.0046869557838722	0.00372367241039902	0.004936874	0.00310871299861493	0.00822814383372874	NA	0.00213347005695598	0.0046400390869718	0.00676305915068078	NA	0.00596214436312699	0.00367355924465277	0.00424750437425793	0.00212631151896673	NA	NA	0.00284488748674762	NA	NA	NA	0.00279971657312992	NA
A0A0C4DGV3	NA	NA	NA	NA	NA	NA	NA	NA	NA	NA	NA	NA	0.0125549586875435	NA	0.00436730183801463	NA	NA	NA	NA	NA	NA	NA	NA	NA	NA	NA	NA	NA	NA	NA	NA	NA	NA
A0A0C4DGW6	NA	NA	NA	NA	NA	NA	NA	0.00778734836535107	NA	NA	NA	NA	NA	NA	NA	NA	NA	NA	NA	NA	NA	NA	NA	NA	NA	NA	NA	NA	NA	NA	NA	NA	NA
A0A0C4DGZ5	NA	NA	NA	NA	0.00344741668202023	NA	NA	NA	0.000756156939964337	NA	NA	NA	0.00133207701412979	0.00257732	NA	NA	NA	NA	NA	0.00261350881482086	NA	NA	NA	NA	NA	NA	0.00269052687426183	NA	NA	NA	NA	NA	NA
A0A0C4DGZ6	NA	NA	NA	NA	0.00317907887088506	NA	NA	NA	NA	NA	NA	NA	NA	NA	NA	NA	NA	NA	NA	0.0074493402463216	NA	NA	NA	NA	NA	NA	NA	NA	NA	NA	NA	NA	NA
A0A0C4DH07	NA	NA	NA	NA	NA	NA	NA	NA	0.00303505596894504	NA	NA	NA	NA	NA	NA	NA	NA	NA	NA	NA	NA	NA	NA	NA	NA	NA	NA	NA	NA	NA	NA	NA	NA
A0A0C4DH22	NA	NA	NA	NA	NA	NA	NA	NA	NA	NA	NA	0.0013990314185135	NA	NA	NA	NA	NA	NA	NA	NA	NA	NA	NA	NA	NA	NA	NA	NA	NA	0.00180077984758832	NA	NA	NA
A0A0C4DH25	NA	NA	0.0475336695499508	0.0270519634551535	0.0488503178424424	0.031218855296452	NA	0.0434826970880235	0.0581025272644523	NA	NA	NA	NA	NA	NA	NA	NA	NA	NA	NA	NA	NA	NA	NA	0.0320660382741489	NA	NA	NA	NA	NA	NA	NA	NA
A0A0C4DH42	NA	NA	NA	0.00964484315962735	NA	NA	NA	NA	NA	NA	NA	NA	NA	NA	NA	NA	NA	NA	NA	NA	NA	NA	NA	NA	NA	NA	NA	NA	NA	NA	NA	NA	NA
A0A0C4DH52	NA	NA	NA	NA	NA	NA	NA	NA	NA	NA	NA	NA	NA	0.001533742	NA	NA	NA	NA	NA	NA	NA	NA	NA	NA	NA	NA	NA	NA	NA	NA	NA	NA	NA
A0A0D9SEI8	NA	0.0107799805922271	NA	NA	0.0205257936670753	0.00867200087437724	NA	0.0198069498311812	0.0159450397532454	NA	0.00889723527438544	0.0176779729652015	0.00608604637889643	0.018115942	0.0039084182322241	0.0228274132681248	NA	NA	NA	0.00551109450639206	NA	0.0122659932521225	NA	NA	NA	NA	0.00648400250344222	0.0107301746572298	NA	NA	NA	NA	0.0100865309733503
A0A0D9SEM4	NA	0.00196777429018675	0.00108374017223323	NA	0.00249784829124389	NA	NA	0.00482073894362511	NA	NA	NA	0.000956127629991429	0.00205097540841982	NA	NA	0.00208345444391954	NA	NA	0.00277793960857973	NA	NA	0.00417952404460153	0.00134891525410083	0.00375990826927277	0.00130128750342941	NA	0.00157811658532822	0.0052231536185925	NA	NA	NA	NA	NA
A0A0D9SEN0	NA	NA	NA	NA	NA	NA	NA	NA	NA	NA	NA	NA	NA	0.00390625	NA	NA	NA	NA	NA	NA	NA	NA	NA	NA	NA	NA	NA	NA	NA	NA	NA	NA	NA
A0A0D9SEN7	NA	NA	NA	NA	NA	NA	NA	NA	NA	NA	NA	NA	NA	0.002024291	0.00436730183801463	NA	NA	NA	0.00212562909518208	NA	NA	NA	NA	NA	NA	NA	NA	NA	NA	NA	NA	NA	0.00751385319057012
A0A0D9SET8	NA	0.00379984035062207	0.0103002032258245	NA	0.0135658982977931	0.00917039201350865	NA	0.00445710560046357	NA	NA	NA	NA	0.00594075585639941	NA	0.00619956017774655	0.012069667159605	NA	NA	NA	0.00635762585522725	NA	0.0194564031284865	NA	NA	NA	NA	0.0038568636120781	0.0170202770765431	NA	NA	NA	0.00478572173716889	0.00533310803208289
A0A0D9SEV0	NA	NA	NA	NA	NA	NA	NA	NA	NA	NA	NA	NA	0.00771411684722516	NA	NA	NA	NA	NA	NA	NA	NA	NA	NA	NA	NA	NA	NA	NA	NA	NA	NA	NA	NA
A0A0D9SF20	NA	NA	NA	NA	0.017063611796137	0.00480616894782196	0.0190404436960157	0.0407076578743788	0.0119299636137671	NA	0.016436659638374	NA	0.010767621152627	0.027108434	NA	0.0168684502730499	0.015767464746603	NA	NA	0.00999602742024143	NA	NA	NA	NA	NA	NA	0.00808547316838013	NA	NA	NA	NA	0.00752453931699253	0.0139753143122674
A0A0D9SF53	NA	NA	0.00154703097703654	NA	NA	0.00123027986090779	NA	0.00239357981334812	NA	NA	NA	NA	0.00156146765131384	0.001528557	NA	NA	NA	NA	NA	0.00232751705916316	NA	NA	0.000843581541485915	NA	NA	NA	NA	0.000497067839815269	NA	NA	NA	NA	0.00201502062705192
A0A0D9SF54	NA	NA	0.000694705264870905	0.00062093599487192	0.00122421997722136	0.000857787757660454	NA	0.00130407197478106	0.000706505004527577	NA	NA	0.000625160623667241	0.000918556960053064	0.000866814	NA	NA	NA	NA	0.000462989759753117	0.00132631637226224	NA	NA	0.000622576820235866	NA	0.000400395852201789	NA	0.00109254232021125	NA	NA	NA	NA	0.0011014754528719	0.000692413777073131
A0A0D9SFB1	NA	NA	NA	NA	NA	NA	NA	NA	NA	NA	NA	NA	0.000273102353770664	NA	NA	NA	NA	NA	NA	NA	NA	NA	NA	NA	NA	NA	NA	NA	NA	NA	NA	NA	NA
A0A0D9SFE5	NA	NA	0.00550558126482393	NA	0.00129144039286512	NA	0.0234838571672248	0.00373094410234927	0.000891758864752129	NA	0.00601261979047743	0.0049433850086509	0.00327283298857508	0.019503546	0.00546465818285495	0.00576274649063761	NA	0.000900077317107207	0.00898988435738491	0.00672478369707303	NA	0.00257250290396188	0.00361624147980361	0.00215994704155118	NA	NA	0.00521282294923255	0.00475084711659777	NA	NA	NA	0.000949144281683814	0.00587614516433416
A0A0D9SFK2	NA	NA	NA	0.00035078198473613	0.000732684968647585	NA	NA	NA	NA	NA	NA	NA	NA	NA	NA	NA	NA	NA	NA	NA	NA	NA	NA	NA	NA	NA	NA	NA	NA	NA	NA	NA	NA
A0A0D9SFL3	NA	NA	NA	NA	0.0188837305513839	NA	NA	0.00248487218609646	0.0032006046683783	NA	NA	0.00394272401960704	0.00438535804214653	0.018484848	0.00490328936719657	NA	NA	NA	0.00190920206607466	0.0040226439763836	NA	NA	0.00927072882480719	NA	NA	NA	0.0140997580214473	NA	NA	NA	NA	0.00605611355874138	NA
A0A0D9SFS3	NA	NA	NA	NA	NA	NA	NA	0.00233321266581209	NA	NA	NA	NA	0.000441182674919401	NA	NA	NA	NA	NA	NA	0.000708212045576478	NA	NA	0.00065286837073011	NA	NA	NA	NA	NA	NA	NA	NA	NA	NA
A0A0D9SFY5	NA	NA	NA	NA	NA	NA	NA	NA	NA	NA	NA	NA	NA	NA	NA	NA	0.00644261958999803	NA	NA	NA	NA	NA	NA	NA	NA	NA	NA	NA	NA	NA	NA	NA	NA
A0A0D9SG25	NA	NA	NA	NA	NA	NA	NA	NA	NA	NA	NA	NA	0.0382848739459395	0.037037037	0.0399527241419321	NA	NA	NA	NA	NA	NA	NA	NA	NA	NA	NA	0.0331404563450235	NA	NA	NA	NA	NA	NA
A0A0D9SG88	NA	NA	0.00351297188949171	0.00246269423288633	0.0045723318412045	NA	NA	NA	NA	NA	NA	NA	NA	NA	NA	NA	NA	NA	NA	NA	NA	NA	NA	NA	NA	NA	NA	NA	NA	NA	NA	NA	NA
A0A0D9SGF6	NA	0.000727871203332174	NA	NA	NA	NA	NA	NA	NA	NA	NA	NA	NA	NA	0.000215917306350644	NA	0.000811198866062674	NA	NA	NA	NA	NA	NA	NA	NA	NA	NA	NA	NA	NA	NA	NA	NA
A0A0F7KYT8	NA	NA	NA	NA	NA	NA	NA	NA	NA	NA	NA	0.00168100663390973	NA	NA	NA	NA	NA	NA	NA	NA	NA	NA	NA	NA	NA	NA	NA	NA	NA	NA	NA	NA	NA
A0A0G2JH38	NA	NA	0.00313510516906004	NA	NA	NA	NA	NA	0.00179625725502208	NA	NA	NA	NA	NA	NA	NA	NA	NA	NA	NA	NA	NA	NA	NA	NA	NA	NA	NA	NA	NA	NA	NA	NA
A0A0G2JH46	NA	NA	0.00665022364450376	NA	NA	NA	NA	NA	NA	NA	NA	0.00234685912243314	0.00447485506066449	NA	NA	0.00852322253420521	NA	NA	NA	0.00359164577535565	NA	0.0073277358181875	0.00496646205253603	NA	NA	NA	NA	NA	NA	NA	NA	NA	NA
A0A0G2JH50	NA	NA	NA	NA	NA	NA	NA	NA	NA	NA	0.000162894679389568	NA	0.000237357298326553	0.000170622	NA	NA	NA	NA	NA	0.000353803469708421	NA	NA	NA	NA	NA	NA	NA	NA	NA	NA	NA	NA	NA
A0A0G2JH68	NA	NA	NA	NA	NA	NA	NA	NA	NA	NA	NA	NA	NA	0.002001281	NA	NA	NA	NA	NA	NA	NA	NA	NA	NA	NA	NA	NA	NA	NA	NA	NA	NA	NA
A0A0G2JHC2	NA	NA	NA	NA	NA	NA	NA	NA	NA	NA	NA	NA	0.00217619267378355	0.002105263	NA	NA	NA	NA	NA	NA	NA	NA	NA	NA	NA	NA	NA	NA	NA	NA	NA	NA	NA
A0A0G2JHI2	NA	NA	NA	NA	NA	NA	NA	NA	NA	NA	NA	0.00737584342089659	NA	NA	NA	NA	NA	NA	NA	NA	NA	NA	NA	NA	NA	NA	NA	NA	NA	NA	NA	NA	NA
A0A0G2JI07	NA	0.00243555590481025	0.00909735006421426	NA	NA	NA	NA	NA	NA	NA	NA	NA	NA	NA	NA	NA	NA	NA	NA	NA	NA	NA	NA	NA	NA	NA	NA	NA	NA	NA	NA	NA	NA
A0A0G2JI36	NA	8.88615377950769e-05	NA	NA	NA	0.000111179181305516	NA	NA	NA	NA	0.00014408450008567	NA	NA	0.000327787	NA	NA	0.000132885523570884	7.47421016392958e-05	NA	NA	NA	NA	0.000232543533997234	0.000154579377880172	NA	NA	NA	0.000235828470064345	NA	NA	NA	NA	5.9667883819309e-05
A0A0G2JIC2	NA	NA	NA	NA	NA	NA	NA	0.00127607782167728	NA	NA	NA	0.00455566840982545	0.00217162065584748	0.00210084	NA	NA	NA	NA	NA	NA	NA	NA	NA	NA	NA	NA	NA	NA	NA	NA	NA	NA	NA
A0A0G2JII1	NA	NA	0.00121056079800091	0.000360671175217619	NA	NA	NA	NA	NA	NA	NA	0.00104859672144877	0.00126885230125577	NA	0.000478157159510387	0.000797918276368747	NA	0.000900077317107207	0.00111708642696507	NA	NA	0.00180075259700901	0.00125177609296667	0.00100797560188951	0.00104656786105118	NA	NA	0.000750133391555826	NA	NA	NA	NA	0.00044872382942117
A0A0G2JIS2	NA	NA	NA	NA	NA	NA	NA	0.000935441140007663	0.000903661352217762	NA	NA	NA	NA	NA	NA	NA	NA	NA	NA	NA	NA	NA	NA	NA	NA	NA	NA	NA	NA	NA	NA	0.000854944156996189	NA
A0A0G2JIW1	NA	0.000940460531408084	0.00240070547436381	0.00082043767375227	0.00362753631332502	0.00112528381634937	NA	0.00193602642819327	0.00121017482906975	0.000916963800280351	0.00146797815244789	NA	0.0053014816921789	0.002304309	0.000426890822658297	0.000637772418418821	0.000873436902766387	NA	0.000772607605269449	0.0024513580636699	NA	0.000890278172165816	0.000803767283662179	0.00145210244518485	NA	NA	0.000806435159561435	NA	NA	NA	NA	0.00161802978570005	NA
A0A0G2JJA7	NA	NA	NA	NA	NA	NA	NA	NA	NA	NA	NA	0.0158515934785254	NA	0.008636174	0.0189249749909713	NA	NA	NA	0.00921106186259808	0.0194074913159181	NA	NA	NA	NA	NA	NA	NA	0.00865943954344025	NA	NA	NA	NA	NA
A0A0G2JJM1	NA	NA	NA	NA	0.00472093263784598	NA	NA	NA	NA	NA	NA	NA	NA	NA	NA	NA	NA	NA	NA	NA	NA	NA	NA	NA	NA	NA	NA	NA	NA	NA	NA	NA	NA
A0A0G2JJT9	NA	NA	NA	NA	NA	NA	NA	NA	NA	NA	NA	NA	NA	NA	NA	NA	NA	NA	NA	NA	NA	NA	0.0188848186563126	NA	NA	NA	NA	NA	NA	NA	NA	NA	NA
A0A0G2JJV3	NA	0.000479573620029571	NA	NA	NA	NA	NA	NA	NA	NA	NA	NA	NA	NA	NA	NA	NA	NA	NA	NA	NA	NA	NA	NA	NA	NA	NA	NA	NA	NA	NA	NA	NA
A0A0G2JJZ9	NA	NA	0.00286216410251247	0.00217062391333008	0.00971533379641793	0.00445938273696061	0.0032121068853834	0.0101621326901922	0.00134171654719637	NA	NA	0.00440751662687988	0.00495235545617306	0.008993902	NA	NA	NA	NA	NA	0.00539622942762442	NA	NA	0.00621817185979094	0.00433306523717948	NA	NA	0.0027280249361087	NA	NA	NA	NA	0.00317345934002995	0.00282914853546863
A0A0G2JL54	0.00274314289530885	0.00193243298550675	0.00174683142863442	0.00199574400994864	0.00309216838939537	0.00269805919012807	NA	0.00406121133059417	0.00383463678834474	0.00121987482034074	NA	0.00187195806176158	0.00141742789564988	0.00233109	NA	NA	0.00186991115373151	0.00165059106927481	0.0019307409179494	0.00384487661891529	NA	0.00227436640197265	0.00133206644595156	NA	0.00165352075185664	0.0012331099692505	NA	0.00275189155053401	NA	NA	0.0015570568786365	0.00226969722831317	0.00138716044776868
A0A0G2JL56	NA	NA	NA	NA	NA	NA	NA	NA	NA	NA	NA	NA	NA	NA	NA	NA	NA	NA	0.000127645418969078	NA	NA	NA	NA	NA	NA	NA	NA	NA	NA	NA	NA	NA	NA
A0A0G2JM75	NA	NA	NA	NA	0.0152288147171324	NA	NA	NA	NA	NA	NA	NA	0.0166724448554031	0.010752688	NA	NA	NA	NA	NA	NA	NA	NA	NA	NA	NA	NA	NA	NA	NA	NA	NA	NA	NA
A0A0G2JMB2	NA	0.00393105393205556	NA	NA	0.00400855523303335	0.00207294246934871	NA	NA	0.00192176015287941	NA	NA	NA	0.00180557495577255	0.004366812	0.00188423339795828	NA	NA	NA	NA	NA	NA	NA	0.00194826964005664	NA	NA	0.00218164380168426	NA	0.0026685985680914	NA	NA	NA	NA	0.00135074355146068
A0A0G2JMS7	NA	NA	NA	NA	NA	NA	NA	NA	NA	NA	NA	NA	0.000440618279307125	0.001065644	NA	NA	NA	NA	NA	NA	NA	NA	NA	NA	NA	NA	NA	NA	NA	NA	NA	NA	NA
A0A0G2JPA8	NA	NA	NA	NA	NA	NA	NA	NA	0.00654398637637245	NA	NA	NA	NA	NA	NA	NA	NA	NA	NA	NA	NA	0.0073413564680068	NA	NA	NA	NA	NA	0.00917449866746313	NA	NA	NA	NA	0.00344966854428514
A0A0G2JPD3	NA	NA	NA	NA	0.000125590026778089	NA	NA	NA	NA	NA	NA	NA	NA	0.000246467	NA	0.000206558555534931	NA	NA	NA	NA	NA	NA	NA	NA	NA	NA	NA	NA	NA	NA	NA	0.000581505320465695	NA
A0A0G2JPR0	NA	NA	NA	0.000824242616834781	NA	NA	NA	NA	NA	NA	NA	NA	NA	NA	0.000783386303700735	NA	0.00103011002524542	NA	NA	NA	NA	NA	NA	0.000871577741568211	NA	NA	NA	NA	NA	0.00185363417321529	NA	NA	NA
A0A0G2JQ62	NA	NA	NA	NA	NA	NA	NA	NA	NA	NA	NA	NA	0.00315149826885184	NA	NA	NA	NA	NA	0.0016007025355567	NA	NA	NA	NA	NA	NA	NA	NA	NA	NA	NA	NA	NA	NA
A0A0G2JQA4	NA	NA	NA	NA	0.00132610431285177	NA	NA	NA	NA	NA	NA	NA	NA	NA	NA	NA	NA	NA	NA	NA	NA	NA	NA	NA	NA	NA	NA	NA	NA	NA	NA	NA	NA
A0A0G2JQD0	NA	NA	NA	NA	NA	NA	NA	NA	NA	NA	NA	NA	0.00254603822417117	NA	NA	NA	NA	NA	NA	NA	NA	NA	NA	NA	NA	NA	NA	NA	NA	NA	NA	NA	NA
A0A0G2JQH2	NA	NA	NA	0.0308209848643715	NA	0.0423088535727501	NA	NA	0.0266717026359318	NA	NA	0.049284044823843	NA	NA	NA	NA	NA	NA	NA	NA	NA	0.0341961027418178	NA	0.0215340201737892	0.0596226423653283	NA	NA	NA	NA	NA	NA	NA	NA
A0A0G2JQJ0	NA	NA	NA	0.02273987363659	NA	NA	NA	NA	0.0107337341379034	NA	NA	NA	NA	NA	NA	NA	NA	NA	NA	NA	NA	NA	NA	NA	NA	NA	NA	NA	NA	NA	NA	NA	NA
A0A0G2JQK5	NA	NA	NA	NA	NA	NA	NA	NA	NA	NA	NA	0.0090354079466423	NA	0.016666667	NA	NA	NA	NA	NA	NA	NA	NA	NA	NA	NA	NA	NA	NA	NA	NA	NA	NA	NA
A0A0G2JQM1	NA	NA	NA	NA	NA	NA	NA	NA	NA	NA	NA	NA	0.00244564299513999	0.001051525	NA	NA	NA	NA	NA	NA	NA	NA	NA	NA	NA	NA	NA	0.000519019674488765	NA	NA	NA	0.00201392861778133	0.00219549138464233
A0A0G2JQT1	NA	NA	NA	NA	NA	NA	NA	NA	NA	NA	NA	NA	NA	0.00128041	NA	NA	NA	NA	NA	NA	NA	NA	NA	NA	NA	NA	NA	NA	NA	NA	NA	NA	NA
A0A0G2JRA5	NA	NA	NA	NA	NA	NA	NA	NA	NA	NA	NA	NA	NA	0.00177305	NA	NA	NA	NA	NA	NA	NA	NA	NA	NA	NA	NA	NA	NA	NA	NA	NA	NA	NA
A0A0G2JRN3	NA	NA	NA	NA	NA	NA	NA	NA	NA	0.0129643293555982	NA	0.00901491997759561	NA	NA	NA	NA	NA	NA	NA	NA	NA	NA	NA	NA	NA	NA	NA	0.0119759454704491	NA	NA	NA	NA	NA
A0A0G2JRQ6	NA	NA	0.00624472270234354	NA	NA	NA	NA	NA	NA	NA	NA	NA	NA	NA	NA	NA	NA	NA	NA	NA	NA	NA	NA	NA	NA	NA	NA	NA	NA	NA	NA	NA	NA
A0A0G2JS82	NA	NA	NA	NA	NA	NA	NA	NA	NA	NA	NA	0.00231380470751161	NA	NA	NA	NA	NA	NA	NA	NA	NA	NA	NA	NA	NA	NA	0.00114570103728145	NA	NA	NA	NA	NA	NA
A0A0G2R1L2	NA	0.00547932738198197	NA	NA	NA	NA	NA	NA	NA	NA	NA	0.0119806521637626	NA	0.005524862	NA	0.0116028845794067	NA	NA	NA	NA	NA	NA	NA	NA	NA	NA	NA	0.00545401165705271	NA	NA	NA	0.00920127805385105	NA
A0A0J9YVP6	NA	NA	NA	NA	0.00225342861322511	NA	NA	0.0021745101901659	NA	NA	NA	NA	0.00246704454597616	0.002386635	NA	NA	NA	NA	NA	NA	NA	NA	NA	NA	NA	NA	NA	NA	NA	NA	NA	NA	0.00221470388645562
A0A0J9YVV8	NA	NA	NA	NA	NA	0.00816486638097338	0.00847169880756474	0.0194811780675877	NA	NA	NA	NA	NA	NA	NA	NA	NA	NA	NA	NA	NA	NA	NA	0.00623353173169038	NA	NA	NA	NA	NA	NA	NA	NA	NA
A0A0J9YVW2	NA	NA	NA	NA	0.0205257936670753	NA	NA	NA	NA	NA	NA	0.011785314948718	NA	NA	NA	NA	NA	NA	NA	NA	NA	NA	NA	NA	NA	NA	NA	NA	NA	NA	NA	NA	NA
A0A0J9YWE1	NA	NA	NA	NA	NA	NA	NA	NA	NA	NA	NA	NA	NA	0.005154639	NA	NA	NA	NA	NA	NA	NA	NA	NA	NA	NA	NA	NA	NA	NA	NA	NA	NA	NA
A0A0J9YWE8	NA	NA	0.00836913819028236	NA	0.0106687742961438	NA	NA	NA	0.0234426835622549	NA	0.0141660900978023	NA	NA	NA	NA	NA	NA	NA	0.00593254870983169	NA	0.0148025658095843	NA	0.00622048778058182	NA	NA	NA	NA	NA	NA	NA	NA	NA	0.0131067921216448
A0A0J9YWF7	NA	NA	NA	NA	NA	NA	NA	NA	NA	NA	NA	NA	0.00415137161211966	0.00502008	NA	NA	NA	NA	NA	NA	NA	NA	NA	NA	NA	NA	NA	NA	NA	NA	NA	NA	NA
A0A0J9YWK4	NA	NA	NA	NA	NA	0.01160471449209	NA	NA	NA	NA	NA	0.0197136179295372	NA	NA	NA	NA	NA	NA	0.0325422891632522	NA	NA	NA	NA	NA	NA	NA	NA	NA	NA	NA	NA	NA	NA
A0A0J9YWQ3	NA	NA	NA	NA	NA	NA	NA	NA	NA	NA	NA	NA	NA	NA	NA	NA	NA	NA	NA	0.00838050791539018	NA	NA	NA	NA	NA	NA	NA	0.0149572133081349	NA	NA	NA	NA	NA
A0A0J9YWU9	NA	NA	NA	NA	0.013113701876704	NA	NA	NA	NA	NA	NA	NA	NA	NA	NA	NA	NA	NA	NA	NA	NA	NA	NA	NA	NA	NA	NA	NA	NA	NA	NA	NA	NA
A0A0J9YX90	NA	NA	NA	NA	0.00676836241123215	NA	NA	NA	NA	NA	NA	0.00155447911295966	NA	NA	NA	NA	NA	NA	NA	NA	NA	NA	NA	NA	NA	NA	NA	NA	NA	NA	NA	NA	NA
A0A0J9YXZ5	NA	NA	0.00469101539237707	0.00214338515880116	0.00448936522684047	0.00117986376060813	NA	NA	NA	NA	0.00337731776272958	0.00330042250354675	0.00339117827219814	0.00611171	0.00143574545104715	0.00274124627590076	NA	NA	NA	0.00303468040155986	NA	NA	0.00165891517196016	0.00218419538160885	0.00174582724427984	NA	0.00192629727895442	NA	NA	NA	NA	0.00215506142896801	NA
A0A0J9YY17	NA	0	NA	NA	NA	NA	NA	NA	NA	NA	NA	NA	NA	NA	NA	NA	NA	NA	NA	NA	NA	NA	NA	NA	NA	NA	NA	NA	NA	NA	NA	NA	NA
A0A0J9YY18	NA	NA	NA	NA	0.00145259509357716	NA	NA	NA	NA	NA	NA	0.00111205022549827	0.00222641251266849	NA	NA	NA	NA	NA	NA	NA	NA	NA	NA	NA	NA	NA	NA	NA	NA	NA	NA	NA	NA
A0A0J9YY65	NA	NA	NA	NA	NA	NA	NA	NA	0.0111413443841697	NA	NA	NA	NA	NA	NA	NA	NA	NA	NA	NA	NA	NA	NA	NA	NA	NA	NA	NA	NA	NA	NA	NA	NA
A0A0J9YYJ0	NA	NA	0.00867910581623303	NA	NA	NA	NA	NA	NA	NA	NA	NA	NA	NA	NA	NA	NA	NA	NA	NA	NA	NA	NA	NA	NA	NA	NA	NA	NA	NA	NA	NA	NA
A0A0K0K1H8	NA	NA	NA	NA	NA	NA	NA	NA	NA	NA	NA	NA	0.00084039953836049	NA	NA	NA	NA	NA	NA	NA	NA	NA	NA	NA	NA	NA	NA	NA	NA	NA	NA	NA	NA
A0A0K0KSV2	NA	NA	NA	NA	NA	NA	0.0121100142363958	NA	NA	NA	NA	NA	NA	NA	NA	NA	NA	NA	NA	NA	NA	NA	NA	NA	NA	NA	NA	NA	NA	NA	NA	NA	NA
A0A0K2BMD8	NA	NA	NA	0.0718281491891702	NA	NA	0.0255020476560566	0.0273346099455382	NA	NA	NA	NA	0.0072795187877823	0.006103286	NA	0.0426431842944749	0.0784789879428692	NA	NA	NA	0.125057361398264	NA	NA	NA	NA	0.0301790661977085	NA	NA	0.0440993940892924	NA	NA	NA	NA
A0A0M3HER2	NA	NA	0.00775859527605557	NA	0.0286117126705252	NA	NA	NA	NA	NA	NA	NA	NA	NA	NA	NA	NA	NA	NA	NA	NA	NA	NA	NA	NA	NA	NA	NA	NA	NA	NA	NA	NA
A0A0M3KKW6	NA	NA	NA	NA	NA	0.00432001563250521	NA	NA	NA	NA	NA	NA	NA	NA	NA	NA	NA	NA	NA	NA	NA	NA	NA	NA	0.00317346275775834	NA	NA	NA	NA	NA	NA	NA	NA
A0A0R4J2E8	NA	0.00223704855190345	0.00192873205710768	NA	0.00677210422244091	0.00302651858367104	0.00145229104354174	0.00747147045069341	0.00132355783841108	NA	0.00698679881291719	0.00694285725794978	0.00421729839482974	0.010015087	0.0081647744315454	0.00430382109540969	0.00278247428986684	NA	0.00276331855877942	0.00215660830898871	NA	NA	0.00500457837635852	0.0026121465582324	NA	NA	0.00213304530854739	0.00338955202165587	NA	NA	NA	0.00224353247001422	NA
A0A0S2KQY6	NA	NA	NA	NA	NA	NA	NA	NA	NA	NA	NA	NA	NA	NA	NA	NA	NA	NA	NA	NA	NA	0.00378681712525882	NA	NA	NA	NA	NA	NA	NA	NA	NA	NA	NA
A0A0S2Z328	NA	NA	NA	NA	NA	NA	NA	NA	NA	NA	NA	NA	NA	NA	NA	NA	NA	NA	NA	NA	NA	NA	NA	NA	NA	NA	NA	NA	0	NA	NA	NA	NA
A0A0S2Z333	NA	NA	NA	0.0114280056810081	NA	NA	NA	NA	NA	NA	NA	NA	NA	NA	NA	NA	NA	NA	NA	NA	NA	NA	NA	NA	NA	NA	NA	NA	NA	NA	NA	NA	NA
A0A0S2Z3C0	NA	NA	NA	NA	NA	NA	NA	NA	NA	NA	NA	NA	NA	NA	NA	NA	NA	NA	NA	NA	NA	NA	NA	NA	NA	NA	NA	NA	NA	NA	0.003431802207596	NA	NA
A0A0S2Z3D5	NA	NA	NA	NA	NA	NA	NA	NA	NA	NA	NA	0.0094059457043598	NA	NA	NA	NA	NA	NA	NA	NA	NA	NA	NA	NA	NA	NA	NA	NA	NA	NA	NA	NA	NA
A0A0S2Z3E8	NA	NA	NA	NA	0.00767655182743777	NA	0.00566436134473124	NA	NA	0.00563291833969306	0.00264046950650962	0.00582929558934974	NA	NA	NA	NA	NA	NA	NA	NA	NA	NA	0.0027413445285218	NA	NA	NA	NA	NA	0.00862619231211967	NA	NA	NA	NA
A0A0S2Z3G9	NA	NA	NA	NA	NA	NA	NA	NA	NA	NA	NA	NA	NA	NA	NA	NA	NA	NA	NA	NA	NA	NA	NA	NA	NA	NA	NA	NA	NA	NA	0.00115122362267059	NA	NA
A0A0S2Z3K0	NA	0.0110157968981507	NA	0.00843838226273587	0.00448544685275106	0.00824806267992179	0.00583926997197785	NA	0.00731729599516029	0.0054126870079126	NA	0.00343388488108141	NA	NA	NA	NA	NA	0.014653879591285	0.00748262045264051	NA	NA	NA	NA	NA	0.00623134490743896	NA	NA	NA	NA	NA	NA	NA	NA
A0A0S2Z3S2	NA	NA	NA	NA	NA	NA	NA	NA	NA	NA	NA	NA	NA	NA	NA	NA	NA	NA	NA	0.00807464942934688	NA	NA	NA	NA	NA	NA	NA	NA	NA	NA	NA	NA	NA
A0A0S2Z4G6	0.00143489184808367	0.00368258477457841	NA	NA	0.00454865825239876	0.00421385955171063	NA	0.00641633642544275	NA	NA	NA	0.0157801501436173	0.0235426238379293	0.01701319	0.00192793680398091	NA	NA	NA	NA	NA	0.00634073036589598	NA	0.00337315239895542	NA	NA	NA	0.00430592587648727	NA	0.00559758805258208	NA	NA	0.00423525172881298	0.00718842937761612
A0A0S2Z4J7	NA	NA	NA	NA	0.0531936070274161	NA	NA	NA	NA	NA	NA	NA	0.043677109625619	0.028169014	0.0151932894320383	NA	NA	NA	NA	NA	NA	NA	NA	NA	NA	NA	NA	NA	NA	NA	NA	NA	NA
A0A0S2Z4L3	NA	NA	NA	NA	NA	NA	NA	NA	NA	NA	NA	NA	NA	NA	NA	0.00184544971067922	NA	NA	NA	NA	NA	NA	NA	0.00514823280472168	NA	NA	NA	0.001734931372568	NA	NA	NA	NA	NA
A0A0S2Z4R8	NA	NA	NA	NA	NA	NA	NA	NA	NA	NA	NA	0.00417018861668075	0.00331311388274935	0.003846154	NA	NA	NA	NA	NA	NA	NA	NA	NA	NA	NA	NA	NA	NA	NA	NA	NA	NA	NA
A0A0S2Z4Z6	NA	NA	NA	NA	0.000356028190696627	NA	NA	NA	NA	NA	NA	NA	NA	0.001131222	NA	NA	NA	NA	NA	NA	NA	NA	NA	NA	NA	NA	NA	NA	NA	NA	NA	NA	0.000524864874571123
A0A0S2Z5G4	NA	NA	NA	NA	0.00221640045017343	NA	NA	NA	NA	NA	NA	NA	NA	NA	NA	NA	NA	NA	NA	NA	NA	NA	NA	NA	NA	NA	NA	NA	NA	NA	NA	NA	NA
A0A0S2Z5W5	NA	NA	NA	NA	NA	NA	NA	NA	NA	NA	NA	NA	0.00418498622918117	0.002699055	NA	NA	NA	NA	NA	0.00223932532540679	NA	NA	NA	NA	NA	NA	NA	NA	NA	NA	NA	NA	NA
A0A0S2Z5W9	NA	NA	0.00264104117022718	NA	NA	NA	NA	NA	NA	NA	NA	NA	NA	NA	NA	NA	NA	NA	NA	NA	NA	NA	NA	NA	NA	NA	NA	NA	NA	NA	NA	NA	NA
A0A0S2Z696	NA	NA	NA	NA	NA	NA	NA	NA	NA	NA	NA	NA	NA	NA	0.0127408297727958	NA	NA	NA	NA	0.00435522448142542	NA	NA	NA	NA	NA	NA	NA	NA	NA	NA	NA	0.00655681631654076	NA
A0A0S4XRU8	NA	NA	NA	NA	NA	NA	NA	NA	NA	NA	NA	NA	NA	NA	0.00333847140687298	NA	NA	NA	NA	NA	NA	NA	NA	NA	NA	NA	NA	NA	NA	NA	NA	NA	NA
A0A0U1RQC3	NA	NA	NA	NA	NA	NA	NA	NA	NA	NA	NA	NA	NA	0.015151515	NA	NA	NA	NA	NA	NA	NA	NA	NA	NA	NA	NA	NA	NA	NA	NA	NA	NA	NA
A0A0U1RQE9	NA	NA	NA	NA	0.00378684418518913	NA	NA	NA	NA	NA	NA	NA	NA	NA	NA	NA	NA	NA	NA	NA	NA	NA	NA	NA	NA	NA	NA	NA	NA	NA	NA	NA	NA
A0A0U1RQF0	0.000802973942641502	0.00133537270976492	0.00168480369735134	0.000751545929632843	0.00285326842581676	0.00102839366461036	NA	0.00451033321394845	0.000758763992236259	NA	NA	0.00203590843684196	0.00198866447891806	0.001857847	0.00137782123242649	NA	NA	NA	0.00208119681270217	0.0038818422997753	NA	0.00111179485138942	0.00142812260053358	0.00085570337890307	NA	NA	0.000587712124320318	NA	NA	NA	NA	NA	0.0016741239945831
A0A0U1RQH7	NA	0.00238403406453733	NA	NA	NA	0.00958923211198811	NA	0.00394234483092857	NA	NA	0.00944475801180231	NA	0.00496967082412402	0.019551282	0.00259308529777063	NA	NA	0.00569472272764547	NA	0.0117004776184736	NA	0.00542534293049294	0.00490278901759933	NA	NA	NA	NA	NA	NA	NA	NA	NA	NA
A0A0U1RQJ0	NA	NA	NA	NA	NA	NA	NA	NA	NA	NA	NA	NA	NA	NA	NA	NA	NA	0.00352530420725603	NA	NA	NA	NA	NA	NA	NA	NA	NA	NA	NA	NA	NA	NA	NA
A0A0U1RQL8	NA	NA	NA	NA	NA	NA	NA	NA	NA	NA	NA	NA	NA	NA	NA	NA	NA	NA	NA	NA	NA	NA	NA	NA	0.00618725512633791	NA	NA	NA	NA	NA	NA	NA	NA
A0A0U1RQM8	NA	NA	NA	NA	NA	NA	NA	0.00394994083595464	NA	NA	NA	NA	NA	NA	NA	NA	NA	NA	NA	0.00959156317962491	NA	NA	NA	NA	NA	NA	NA	NA	NA	NA	NA	NA	NA
A0A0U1RQV3	NA	NA	0.00548643506998959	NA	NA	NA	NA	NA	NA	NA	NA	NA	NA	NA	NA	NA	NA	NA	NA	0.00197540501051156	NA	NA	NA	NA	NA	NA	NA	NA	NA	NA	NA	NA	NA
A0A0U1RQW2	NA	NA	NA	NA	NA	NA	NA	NA	NA	NA	NA	NA	NA	NA	NA	0.00795500825862408	NA	NA	NA	NA	NA	NA	NA	NA	NA	NA	0.00423670563723339	NA	NA	NA	NA	NA	NA
A0A0U1RR27	NA	NA	NA	NA	NA	NA	NA	0.000882298260655853	NA	NA	NA	NA	NA	NA	NA	NA	NA	NA	NA	NA	NA	NA	NA	NA	NA	NA	NA	NA	NA	NA	NA	NA	NA
A0A0U1RRA7	NA	0.00139553177250054	NA	NA	NA	NA	NA	NA	NA	NA	NA	NA	NA	NA	NA	NA	NA	NA	NA	NA	NA	NA	NA	NA	NA	NA	NA	NA	NA	NA	NA	NA	NA
A0A0U1RRD1	NA	NA	NA	NA	NA	NA	NA	NA	NA	NA	NA	NA	NA	NA	NA	NA	NA	NA	NA	NA	NA	NA	NA	0.00615257665108441	NA	NA	NA	NA	NA	NA	NA	NA	NA
A0A0U1RRE1	NA	NA	NA	NA	0.00195079889159516	NA	NA	NA	NA	NA	NA	NA	NA	NA	NA	0.00650864264339196	NA	NA	NA	0.00914237196963647	NA	NA	NA	NA	NA	NA	NA	NA	NA	NA	NA	NA	NA
A0A0U1RRG3	NA	NA	NA	NA	NA	NA	NA	NA	NA	NA	NA	NA	NA	NA	NA	NA	NA	NA	NA	NA	NA	NA	NA	NA	NA	NA	NA	NA	NA	NA	NA	0.0027757185409407	NA
A0A0U1RRM4	NA	NA	0.00511530715469351	NA	0.0100036062177097	0.000975335170903429	0.00257596900710441	0.0115096623418029	0.00559518834130232	NA	NA	0.0105597189155104	0.0111625213199566	0.008557457	NA	0.00902864211005148	0.00123861474314758	NA	NA	0.00540942339684926	NA	NA	0.013297867273571	NA	0.00240531462870552	NA	NA	NA	NA	NA	NA	0.00203597976079124	NA
A0A0U1RRM6	NA	NA	NA	NA	0.00434108734199142	NA	NA	NA	NA	NA	NA	NA	NA	0.005747126	NA	NA	NA	NA	NA	NA	NA	NA	NA	NA	NA	NA	NA	NA	NA	NA	NA	NA	NA
A0A0U2XJU5	NA	NA	NA	NA	NA	NA	NA	NA	NA	NA	NA	NA	0.00856650514073431	NA	NA	NA	NA	NA	NA	NA	NA	NA	NA	NA	NA	NA	NA	NA	NA	NA	NA	NA	NA
A0A0X9T7T4	NA	NA	NA	0.00358428079394532	NA	NA	NA	NA	NA	NA	NA	NA	NA	NA	NA	NA	NA	NA	NA	NA	NA	NA	NA	NA	NA	NA	NA	NA	NA	NA	NA	NA	NA
A0A0X9TD47	NA	NA	0.0319045021777916	0.0125948376024054	0.0144968558279246	0.0263633465130364	NA	0.0307595517597714	0.0456339996373111	NA	NA	NA	NA	NA	NA	NA	NA	NA	NA	NA	NA	NA	NA	NA	NA	NA	NA	NA	NA	NA	NA	NA	NA
A0A0X9TDD0	NA	NA	NA	0.0071626238018132	0.0398952052705621	NA	NA	NA	NA	NA	NA	NA	NA	NA	NA	NA	NA	NA	NA	0.0155806616840016	NA	NA	NA	NA	0.0207839495696769	NA	NA	NA	NA	NA	NA	0.00390946339050911	NA
A0A0X9USK2	NA	NA	NA	NA	NA	NA	NA	NA	0.00497269079933167	NA	NA	NA	NA	NA	NA	NA	NA	NA	NA	NA	NA	NA	NA	NA	NA	NA	NA	NA	NA	NA	NA	NA	NA
A0A0X9USN3	NA	NA	NA	NA	NA	NA	NA	0.0210258394019923	NA	NA	NA	NA	NA	NA	NA	NA	NA	NA	NA	NA	NA	NA	NA	NA	NA	NA	NA	NA	NA	NA	NA	NA	NA
A0A0X9UWK7	NA	NA	NA	NA	NA	NA	NA	NA	NA	NA	NA	NA	NA	NA	NA	NA	NA	NA	NA	0.0045337175237945	NA	NA	NA	NA	NA	NA	NA	NA	NA	NA	NA	NA	NA
A0A0X9V9B3	NA	NA	NA	NA	NA	0.020722703823299	NA	NA	NA	NA	NA	NA	NA	NA	NA	NA	NA	NA	NA	NA	NA	NA	NA	NA	0.0127762804365865	NA	NA	NA	NA	NA	NA	NA	0.0361543195728082
A0A109PP82	NA	NA	0.015755915284376	NA	NA	0.0245484339194729	NA	NA	NA	NA	NA	NA	NA	NA	NA	NA	NA	NA	NA	NA	NA	NA	NA	NA	NA	NA	NA	NA	NA	NA	NA	NA	NA
A0A109PS45	NA	NA	NA	NA	NA	NA	NA	NA	NA	NA	NA	NA	NA	NA	NA	NA	NA	NA	0.00516423480411937	NA	NA	NA	NA	NA	NA	NA	NA	NA	NA	NA	NA	NA	NA
A0A109PVK5	NA	NA	NA	NA	NA	NA	NA	NA	NA	NA	NA	NA	NA	NA	NA	NA	NA	NA	0.0108253710889988	NA	NA	NA	NA	NA	NA	NA	NA	NA	NA	NA	NA	NA	NA
A0A109PW65	NA	NA	NA	NA	NA	NA	NA	NA	NA	NA	NA	NA	NA	NA	NA	NA	NA	NA	NA	NA	NA	NA	0.015688925468186	NA	NA	NA	NA	NA	NA	NA	NA	NA	NA
A0A126LB18	NA	NA	NA	NA	NA	NA	NA	NA	NA	NA	NA	0.00299516304094065	NA	NA	NA	NA	NA	NA	NA	NA	NA	NA	NA	NA	NA	NA	NA	NA	NA	NA	NA	NA	NA
A0A140KFU0	NA	0.162665901573962	NA	0.0577916704228103	NA	NA	NA	NA	NA	NA	0.0417473193139829	NA	NA	NA	0.280087241572428	NA	NA	NA	NA	0.153783144054644	NA	NA	NA	NA	NA	0.176150260602357	0.161503125152893	0.287672259277639	NA	NA	0.0894243205420896	0.177986747185816	0.129992950003733
A0A140T8Z1	NA	NA	NA	NA	NA	NA	NA	NA	NA	NA	0.000609037262432851	NA	NA	NA	NA	NA	NA	NA	NA	0.000823085974159976	NA	NA	NA	NA	NA	NA	NA	NA	NA	NA	NA	NA	NA
A0A140T904	NA	NA	NA	NA	0.00901566986319902	NA	NA	NA	NA	NA	NA	NA	NA	NA	NA	NA	NA	NA	NA	NA	NA	NA	NA	NA	NA	NA	NA	NA	NA	NA	NA	NA	NA
A0A140T907	NA	NA	NA	NA	0.0157364424408821	NA	NA	NA	NA	NA	NA	0.0180708169775336	NA	0.008333333	NA	NA	NA	NA	NA	NA	NA	NA	NA	NA	NA	NA	NA	0.0411323373377532	NA	NA	NA	0.0104089455694222	0.0231990217026862
A0A140T912	NA	NA	NA	NA	NA	NA	NA	NA	NA	NA	NA	NA	0.000313587918881249	NA	NA	NA	NA	NA	NA	NA	NA	NA	NA	NA	NA	NA	NA	NA	NA	NA	NA	NA	NA
A0A140T921	NA	NA	NA	NA	NA	NA	0.00100659670025115	NA	NA	NA	NA	NA	0.00117862136170353	NA	0.000264263538545004	NA	NA	NA	NA	NA	NA	NA	NA	NA	NA	NA	NA	NA	NA	NA	NA	NA	NA
A0A140T936	NA	NA	NA	NA	0.00176219952108626	NA	NA	NA	NA	NA	NA	NA	NA	NA	0.00181196539225456	NA	NA	NA	NA	NA	NA	NA	0.00285492764507341	NA	NA	NA	NA	NA	NA	NA	NA	NA	NA
A0A140T942	NA	NA	NA	NA	NA	NA	NA	NA	NA	NA	NA	NA	NA	NA	NA	NA	NA	NA	NA	NA	NA	NA	NA	NA	NA	0.000191416385561117	NA	NA	NA	NA	NA	NA	NA
A0A140T951	NA	NA	NA	NA	NA	NA	NA	NA	NA	NA	NA	NA	NA	NA	NA	NA	NA	NA	NA	NA	NA	NA	NA	NA	NA	NA	NA	NA	NA	NA	NA	0.000369275247461632	NA
A0A140T953	NA	NA	NA	NA	NA	NA	NA	NA	NA	NA	NA	NA	NA	NA	NA	NA	NA	NA	NA	0.000324597971133332	NA	NA	NA	NA	NA	NA	NA	NA	NA	NA	NA	NA	NA
A0A140T958	NA	NA	NA	NA	NA	NA	NA	NA	NA	NA	NA	0.00144566496787305	0.000886021517019421	0.000444444	NA	NA	NA	NA	NA	NA	NA	NA	0.000815824144741275	NA	NA	NA	NA	0.00131623445521953	NA	NA	NA	NA	NA
A0A140T971	NA	0.00269499490011721	NA	NA	0.0051314488888621	NA	NA	NA	0.00358763398848853	NA	0.00889723527438544	0.0166958634764957	NA	NA	NA	NA	NA	NA	NA	0.00601210360071269	NA	NA	NA	NA	NA	NA	NA	NA	NA	NA	NA	NA	NA
A0A140T974	NA	NA	NA	NA	0.0104909613125259	NA	NA	NA	NA	NA	NA	0.0120472109569394	NA	NA	NA	NA	NA	NA	0.00583367286299913	NA	NA	0.0125385710053332	NA	NA	NA	NA	NA	0.0109686230926323	NA	NA	NA	NA	NA
A0A140T998	NA	NA	NA	NA	NA	NA	NA	NA	NA	NA	NA	NA	0.00160262304857965	0.004651163	NA	NA	NA	NA	NA	NA	NA	NA	NA	NA	NA	NA	NA	NA	NA	NA	NA	NA	NA
A0A140T9A1	NA	NA	NA	NA	NA	NA	NA	NA	NA	NA	NA	NA	NA	NA	NA	0.0018104501264438	NA	0.00816898241750695	0.00120696640094219	0.00778809239170092	NA	NA	NA	0.00122521105320411	NA	NA	NA	NA	NA	NA	NA	NA	NA
A0A140T9G0	NA	NA	NA	NA	NA	NA	NA	NA	NA	NA	NA	NA	NA	NA	NA	NA	NA	NA	NA	0.000449685693449787	NA	NA	NA	NA	NA	NA	NA	NA	NA	NA	NA	NA	NA
A0A140T9I7	NA	NA	NA	NA	NA	NA	NA	NA	0.0017017722940705	NA	NA	NA	NA	NA	NA	NA	NA	NA	NA	NA	NA	NA	NA	NA	NA	NA	NA	NA	NA	NA	NA	NA	NA
A0A140T9R1	NA	NA	NA	NA	NA	NA	NA	NA	NA	NA	NA	NA	NA	NA	NA	NA	NA	NA	NA	NA	NA	NA	NA	NA	NA	0.00139942962641255	NA	NA	NA	0.0070366600844061	NA	NA	NA
A0A140TA02	NA	NA	NA	NA	NA	NA	NA	0.00813499702431236	NA	NA	NA	0.000322693102228332	NA	NA	NA	NA	NA	NA	0.000520863873495143	NA	NA	NA	NA	0.00422989703980608	NA	NA	NA	NA	NA	NA	NA	NA	NA
A0A140TA21	NA	NA	NA	NA	NA	NA	NA	0.000193690383647444	NA	NA	NA	NA	NA	NA	NA	NA	NA	NA	NA	NA	NA	NA	NA	NA	NA	NA	NA	NA	NA	NA	NA	NA	NA
A0A140TA54	NA	NA	0.0037607284640804	NA	NA	NA	0.00196156103538182	NA	0.00283484984538645	NA	NA	NA	NA	NA	NA	NA	NA	NA	NA	NA	NA	NA	NA	NA	0.00154473211666246	NA	NA	NA	NA	NA	NA	NA	NA
A0A140VJH9	NA	NA	NA	NA	0.0157364424408821	NA	NA	NA	NA	NA	NA	NA	NA	NA	NA	NA	NA	NA	NA	NA	NA	NA	NA	NA	NA	NA	NA	NA	NA	NA	NA	NA	NA
A0A140VJJ6	NA	NA	NA	NA	NA	NA	NA	NA	NA	NA	NA	NA	NA	NA	NA	NA	NA	0.00542106358393657	NA	NA	NA	NA	NA	NA	NA	NA	NA	NA	NA	NA	NA	NA	NA
A0A140VJS7	NA	NA	NA	NA	NA	0.00747960090374239	NA	NA	NA	NA	NA	NA	NA	NA	NA	NA	NA	NA	NA	NA	NA	NA	NA	NA	NA	NA	NA	NA	NA	NA	NA	NA	NA
A0A140VJW8	NA	NA	NA	NA	NA	NA	NA	NA	NA	NA	NA	NA	NA	NA	0.000481573477002456	NA	NA	NA	NA	NA	NA	NA	NA	NA	NA	NA	NA	NA	NA	NA	NA	NA	NA
A0A140VK07	NA	NA	NA	NA	NA	0.00469829754522012	0.00611656675820456	NA	NA	NA	0.00324112486136754	0.00598751137148517	0.00942230565020706	0.008921296	NA	NA	NA	NA	NA	NA	NA	NA	NA	NA	NA	NA	NA	NA	0.00393614598146048	NA	NA	NA	NA
A0A140VK14	NA	NA	NA	NA	NA	NA	NA	NA	NA	NA	NA	NA	NA	NA	NA	NA	NA	NA	0.00285525245213383	NA	NA	NA	NA	NA	NA	NA	NA	NA	NA	NA	NA	NA	NA
A0A146E5L3	NA	NA	NA	0.0143176367003689	NA	NA	NA	NA	NA	NA	NA	NA	0.00617744022149594	NA	NA	NA	NA	NA	NA	NA	NA	NA	NA	NA	NA	NA	NA	NA	NA	NA	NA	NA	NA
A0A158RFU6	NA	NA	NA	NA	NA	NA	NA	NA	NA	NA	NA	NA	NA	NA	NA	NA	NA	NA	NA	NA	NA	NA	NA	NA	NA	NA	NA	NA	NA	NA	NA	0.00402278100098736	NA
A0A173GMX4	NA	NA	0.0308693029093596	NA	NA	NA	NA	NA	NA	NA	NA	NA	NA	NA	NA	NA	NA	NA	NA	0.0588418603915132	NA	NA	NA	NA	NA	NA	NA	NA	NA	NA	NA	NA	NA
A0A193CHQ9	NA	NA	NA	NA	NA	NA	NA	NA	NA	NA	NA	NA	NA	NA	NA	NA	NA	NA	NA	0.0223480196327378	NA	NA	NA	NA	NA	NA	NA	NA	NA	NA	NA	NA	NA
A0A1B0GTG2	NA	NA	0.00365762372137123	NA	NA	NA	NA	NA	NA	NA	NA	NA	NA	NA	NA	NA	NA	NA	NA	NA	NA	NA	NA	NA	NA	NA	NA	NA	NA	NA	NA	NA	NA
A0A1B0GTP7	NA	NA	NA	NA	NA	NA	NA	NA	NA	NA	NA	NA	NA	NA	NA	NA	NA	NA	0.00364604501434394	NA	NA	NA	NA	NA	NA	NA	NA	NA	NA	NA	NA	NA	NA
A0A1B0GTZ8	NA	NA	NA	NA	NA	NA	NA	NA	NA	NA	NA	NA	NA	NA	0.0163442960927827	NA	NA	NA	NA	NA	NA	NA	NA	NA	NA	NA	NA	NA	NA	NA	NA	NA	NA
A0A1B0GU03	NA	NA	0.00164124111144743	0.00733480129039373	0.00888957658500174	NA	NA	NA	NA	NA	NA	0.00260636761436322	NA	NA	NA	0.00369162081328697	NA	NA	0.00378627751489563	0.00265919930789487	NA	0.00542534293049294	0.00612848627199917	0.00569409144012598	NA	NA	0.00450161695735469	0.00355952893640408	NA	NA	NA	0.00474823620966864	0.00148711668063775
A0A1B0GUB2	NA	NA	NA	NA	NA	NA	NA	0.000674903725443429	NA	NA	NA	NA	NA	NA	NA	NA	NA	NA	NA	NA	NA	NA	NA	NA	NA	NA	NA	NA	NA	NA	NA	NA	NA
A0A1B0GUK8	NA	NA	0.0129637282452838	NA	0.00896379625537437	0.0126237991451436	NA	0.0116361357799311	NA	NA	0.00310840095651941	0.00857791884061303	0.00408896971775731	0.003164557	0.00682736434085806	0.0063690412295201	NA	NA	NA	0.0163366848597782	NA	0.00535666754639575	0.0129086100400501	0.00239872667683856	0.00207547206724662	NA	NA	NA	NA	NA	NA	0.00263517612514672	NA
A0A1B0GUU9	0.00373861600617081	0.00859321616632011	0.00411001056594981	0.0102686320989918	0.00519735688523254	0.00595294774097652	NA	0.00216712100931409	NA	0.0053207129015677	NA	NA	0.00158056820465381	0.004332314	0.0016494244060255	0.00323795559549211	0.00154921525196794	NA	0.00428159445355943	0.00668984904895359	NA	0.0127686369838966	0.00259882820867695	0.00494997097835452	0.0121803822096415	0.00203709056294183	NA	0.0114502080626801	NA	0.00189684580360924	0.00538293758918134	NA	0.00457201215931766
A0A1B0GUV8	NA	NA	NA	NA	NA	NA	NA	NA	NA	NA	NA	0.00774463553772897	NA	NA	NA	NA	NA	NA	NA	NA	NA	NA	NA	NA	NA	NA	NA	NA	NA	NA	NA	NA	NA
A0A1B0GUY0	NA	NA	NA	NA	NA	NA	NA	NA	NA	NA	NA	0.00203806175534994	NA	NA	NA	NA	NA	NA	NA	NA	NA	NA	NA	NA	NA	NA	NA	NA	NA	NA	NA	NA	NA
A0A1B0GV23	NA	NA	NA	NA	0.0043311308950582	0.00487965812098948	NA	NA	NA	NA	NA	NA	0.00632227281861523	0.012232416	NA	NA	0.00929529151180764	NA	NA	0.0033829571612618	NA	NA	NA	NA	NA	NA	0.00820910393916297	0.00603777428811056	NA	NA	NA	NA	NA
A0A1B0GVC3	NA	NA	NA	NA	NA	NA	NA	NA	NA	NA	NA	NA	NA	NA	NA	0.00937554447260742	NA	NA	NA	NA	NA	NA	NA	NA	NA	NA	NA	NA	NA	NA	NA	NA	NA
A0A1B0GVN9	NA	NA	NA	NA	NA	NA	NA	NA	NA	NA	NA	NA	NA	0.003846154	NA	NA	NA	NA	NA	NA	NA	NA	NA	NA	NA	NA	NA	NA	NA	NA	NA	NA	NA
A0A1B0GVS3	NA	NA	NA	NA	0.012817012032519	NA	NA	NA	NA	NA	NA	0.00490610419113918	NA	0.002262443	NA	NA	NA	NA	NA	NA	NA	NA	NA	NA	NA	NA	NA	NA	NA	NA	NA	0.0113038325977887	NA
A0A1B0GVU9	NA	NA	NA	NA	0.00169817706521138	NA	NA	NA	NA	NA	NA	NA	NA	0.00263789	NA	NA	NA	NA	NA	NA	NA	NA	NA	NA	NA	NA	NA	NA	NA	NA	NA	NA	0.00133519556711554
A0A1B0GVZ4	NA	NA	NA	NA	NA	NA	NA	NA	NA	NA	NA	0.00337772295153651	NA	NA	NA	NA	NA	NA	NA	NA	NA	NA	NA	NA	NA	NA	NA	NA	NA	NA	NA	NA	NA
A0A1B0GW05	NA	NA	NA	NA	NA	NA	NA	NA	NA	NA	NA	NA	0.00182308879251024	NA	NA	NA	NA	NA	NA	NA	NA	NA	NA	NA	NA	NA	NA	NA	NA	NA	NA	NA	NA
A0A1B0GW42	NA	NA	NA	NA	0.0193679292306385	NA	NA	NA	0.0406230550547781	NA	0.0440755357513195	0.0917441463142296	0.0596360540242546	NA	NA	0.0323095704372436	NA	NA	NA	NA	NA	NA	NA	NA	NA	NA	NA	NA	NA	NA	NA	NA	NA
A0A1B0GWA0	NA	NA	NA	NA	NA	NA	NA	NA	NA	NA	NA	NA	NA	NA	NA	NA	NA	NA	NA	NA	NA	NA	NA	NA	0.00127102564394641	NA	NA	NA	NA	NA	NA	NA	NA
A0A1B0GWG0	NA	NA	NA	NA	NA	NA	NA	NA	NA	NA	NA	NA	NA	NA	0.00181399662870469	NA	NA	NA	NA	NA	NA	0.00168680294027302	NA	NA	NA	NA	NA	0.00221339884052924	NA	NA	NA	NA	NA
A0A1B0GXH0	NA	NA	NA	NA	NA	NA	NA	NA	NA	NA	NA	NA	NA	0.005725191	NA	NA	NA	NA	NA	NA	NA	NA	NA	NA	NA	NA	NA	NA	NA	NA	NA	NA	NA
A0A1B0GXJ2	NA	NA	NA	NA	NA	NA	NA	NA	NA	NA	NA	NA	NA	NA	NA	NA	NA	NA	NA	NA	NA	NA	NA	0.0200175400533457	NA	NA	NA	NA	NA	NA	NA	0.00586419508576366	0.0130698713425854
A0A1B4WRL5	NA	NA	0.0741104150360057	NA	NA	NA	NA	NA	0.0586777466792162	NA	NA	NA	NA	NA	NA	NA	NA	NA	NA	NA	NA	NA	NA	NA	NA	NA	NA	NA	NA	NA	NA	NA	0.0300441510291851
A0A1C7CYX0	NA	NA	NA	NA	NA	NA	NA	0.00130159919588688	NA	NA	NA	NA	NA	NA	NA	NA	NA	NA	NA	NA	NA	NA	NA	NA	NA	NA	NA	NA	NA	NA	NA	NA	NA
A0A1C7CYX9	NA	NA	0.00161790620643001	0.00328051187633105	NA	NA	0.00166440969938274	0.00179920995911196	0.00417140333767833	NA	NA	0.00218867153077164	NA	0.007470206	0.00213018128929841	NA	0.00160061117708139	0.00210515808051569	0.00793490063993505	0.0074058080020912	NA	NA	0.00201378439800009	0.00274419825038221	0.00155414486239678	0.00236775547206958	0.00141357411998926	0.00285911960441132	NA	NA	NA	0.00361764318881866	0.00235835501272126
A0A1C9J6R2	NA	NA	NA	NA	NA	NA	NA	NA	0.0400332002365106	NA	NA	NA	NA	NA	NA	NA	NA	NA	NA	NA	NA	NA	NA	NA	NA	NA	NA	NA	NA	NA	NA	NA	NA
A0A1L2BU33	NA	NA	0.00832629659507988	NA	NA	0.00486478109506393	NA	NA	0.0151817517067628	NA	NA	NA	NA	NA	NA	NA	NA	NA	NA	NA	NA	NA	0.0165817919660359	NA	NA	NA	NA	NA	NA	NA	NA	0.00338502324051757	NA
A0A1L2BU39	NA	NA	NA	NA	NA	NA	NA	NA	0.00178895539626183	NA	NA	NA	NA	NA	NA	NA	NA	NA	NA	NA	NA	NA	NA	NA	NA	NA	NA	NA	0.00240009004992421	NA	NA	NA	NA
A0A1L2BU41	NA	0.0419052773807653	NA	0.0286504931730678	0.0398952052705621	0.0337108772115091	NA	0.0224571756668102	NA	NA	NA	NA	0.029118073083746	NA	NA	NA	NA	NA	NA	0.0155806616840016	NA	NA	0.0143631010967219	NA	0.0103919742929517	NA	NA	NA	NA	NA	NA	NA	NA
A0A1P8SD62	NA	NA	NA	NA	NA	NA	NA	NA	NA	NA	NA	NA	NA	0.00087108	NA	NA	NA	NA	NA	NA	NA	NA	NA	NA	NA	NA	NA	NA	NA	NA	NA	NA	NA
A0A1S5UZ16	NA	NA	NA	0.0010797159136712	NA	NA	NA	NA	NA	NA	NA	NA	NA	NA	NA	NA	NA	NA	NA	NA	NA	NA	NA	NA	NA	NA	NA	NA	NA	NA	NA	NA	NA
A0A1S5UZ39	NA	NA	NA	NA	NA	NA	NA	NA	NA	NA	NA	NA	NA	NA	NA	NA	NA	NA	NA	NA	NA	NA	NA	NA	NA	NA	NA	0.0549250352836654	NA	NA	0.0433532256595981	NA	NA
A0A1U9X9C7	NA	NA	NA	NA	0.00100552371695967	NA	NA	NA	NA	NA	NA	NA	NA	NA	NA	NA	NA	NA	NA	NA	NA	NA	NA	NA	NA	NA	NA	NA	NA	NA	NA	NA	NA
A0A1W2PNG3	NA	NA	NA	NA	NA	NA	NA	NA	NA	NA	NA	NA	NA	NA	NA	NA	NA	NA	NA	NA	NA	NA	0.00364207251178648	NA	NA	NA	NA	NA	NA	NA	NA	NA	NA
A0A1W2PNX7	NA	NA	NA	NA	NA	0.00712342909021099	NA	NA	NA	NA	NA	NA	NA	NA	NA	NA	NA	NA	NA	NA	NA	NA	0.018210360519372	NA	NA	NA	NA	NA	NA	NA	NA	NA	NA
A0A1W2PP22	NA	NA	0.0276353759281492	NA	0.00749354392954514	0.00759832510752755	0.00501700609359863	0.0130159956033477	0.00628690127274349	NA	0.0779567294826676	NA	0.0344563862412381	0.033333333	NA	0.0150008715761963	0.0144740963773972	0.0112809758322241	0.0200011624516154	NA	NA	NA	0.0145682880075856	0.0180475595030099	0.0281078173539998	0.00951612345799115	NA	NA	NA	NA	NA	NA	NA
A0A1W2PP34	NA	NA	0.00717456925279701	NA	0.00220963440951687	NA	NA	0.00165944692888703	0.00240460524522925	NA	NA	0.000968079306684997	0.00432282486895128	0.000610501	0.0029635265169051	0.00378227153206109	NA	NA	0.00216358775140381	0.00115654039851827	NA	0.00126304274489654	0.00140079657080547	0.00106048682626964	NA	NA	0.00273135624792429	NA	NA	NA	NA	0.00386545353592595	NA
A0A1W2PP35	NA	NA	0.00328248222289485	NA	NA	NA	NA	NA	NA	NA	NA	0.00260636761436322	0.000828278470687336	NA	NA	0.00215023202514626	NA	NA	0.00252418500993042	NA	NA	NA	NA	NA	NA	NA	NA	NA	NA	NA	NA	0.00200172017370186	NA
A0A1W2PP79	NA	NA	NA	NA	NA	NA	NA	NA	NA	NA	NA	NA	NA	NA	NA	0.0150008715761963	NA	NA	NA	0.0316064856993199	NA	0.0644840799396299	NA	NA	NA	NA	NA	NA	NA	NA	NA	NA	NA
A0A1W2PPH1	NA	NA	0.00434876704638475	NA	0.00501160612547732	NA	NA	0.00201503872948408	NA	NA	NA	NA	NA	0.005307856	NA	0.00631671563826765	NA	NA	NA	0.00587169352845633	NA	NA	NA	NA	NA	NA	0.00284965674084373	0.00314387252140729	NA	NA	NA	0.0026519603416985	0.000985096346717693
A0A1W2PPS1	NA	NA	NA	NA	NA	0.000801028157970327	NA	0.00275024217960496	0.00439116675410732	NA	NA	NA	NA	NA	NA	NA	NA	NA	NA	NA	NA	NA	NA	NA	NA	NA	NA	NA	NA	NA	NA	NA	NA
A0A1W2PPU9	NA	NA	NA	NA	0.00385382288908184	NA	NA	NA	NA	NA	NA	NA	NA	NA	NA	NA	NA	NA	NA	NA	NA	NA	NA	NA	NA	NA	NA	NA	NA	NA	NA	NA	NA
A0A1W2PQ51	0.00522447583758924	0.00327320185182461	0.00612142509932152	NA	0.0115668033211263	0.00325410588540987	NA	0.00515840537503864	0.00708395865565987	NA	0.00423943952118566	0.0111120201750794	0.00976377946731606	0.011786028	0.00773809611742703	0.00301364155797833	0.00412367419314093	NA	0.00663500068753662	0.00763031123713235	NA	0.00365134187653416	0.00200005101830355	0.00463171151509753	NA	NA	0.00336867297421099	0.00120534299087887	NA	NA	NA	0.0070409713490317	0.00682776996253922
A0A1W2PQG6	NA	NA	NA	NA	NA	NA	NA	NA	NA	NA	NA	NA	NA	0.037037037	NA	NA	NA	NA	NA	NA	NA	NA	0.0283272274745787	NA	NA	NA	NA	NA	NA	NA	NA	0.0308413201748541	NA
A0A1W2PQJ7	NA	NA	NA	NA	0.000216457594004821	NA	NA	NA	NA	NA	NA	NA	NA	NA	NA	NA	NA	NA	NA	NA	NA	NA	NA	NA	NA	NA	NA	NA	NA	NA	NA	NA	NA
A0A1W2PQM2	0.0163287641535486	0.0119711982673589	0.00883996150447356	0.00679622639576037	0.0197188559815266	0.0315052486166882	0.0220258789461998	NA	0.00887176015403903	0.00926548708797774	0.0138444499469818	0.00878438804010948	NA	0.014181642	0.014157463478656	0.00609791547122942	0.00509927477033888	0.0319856916916497	0.0124014171414787	0.0182352170510223	NA	0.0105179820230178	0.00914219267146266	0.0171947024047232	0.0119258268574532	0.0104445255516112	0.0207849554733308	0.00802582155839961	0.00462874281894058	NA	0.0041120138465936	0.0229352571959695	0.0129262536229111
A0A1W2PQY5	NA	NA	NA	NA	0.00204664704275482	NA	NA	NA	NA	NA	NA	NA	0.00448132183529891	NA	NA	NA	NA	NA	NA	NA	NA	NA	NA	NA	NA	NA	NA	NA	NA	NA	NA	NA	NA
A0A1W2PRI6	NA	NA	NA	NA	NA	NA	NA	NA	NA	NA	NA	NA	NA	NA	NA	NA	NA	NA	NA	NA	NA	NA	0.00929487110081045	NA	NA	NA	NA	NA	NA	NA	NA	NA	NA
A0A1W2PRR1	0.00360431077338063	0.0068179223142502	0.0173386578320931	0.00775950861008471	0.0206898744018363	0.0156760036755982	0.00530186225337889	0.0126187938766938	0.00887878211994902	NA	0.00864660887098404	0.00838841813791912	0.0144355961923655	0.014025822	0.0143642903816263	0.0110305708655592	0.00535133841371422	0.00347565223552044	0.0134604897965846	0.0132702369379509	NA	0.0121926753366785	0.0112510960460585	0.00785873806618349	NA	NA	0.00866436264040345	0.0108239168985661	NA	NA	NA	0.0118023453134402	0.0175416943508561
A0A1W2PRU9	NA	NA	NA	NA	NA	NA	NA	NA	NA	NA	NA	NA	NA	NA	NA	NA	NA	NA	NA	0.00873337109216315	NA	NA	NA	NA	NA	NA	NA	NA	NA	NA	NA	NA	NA
A0A1W2PS48	NA	NA	NA	NA	NA	NA	NA	NA	NA	NA	NA	0.0216849799393407	NA	NA	NA	NA	NA	NA	0.0630036618800977	0.0221245396576558	NA	NA	NA	NA	NA	NA	NA	NA	NA	NA	NA	NA	NA
A0A1W2PS52	NA	NA	NA	NA	NA	NA	NA	NA	NA	NA	NA	NA	NA	NA	NA	NA	NA	NA	NA	NA	NA	NA	0.0122865084373785	0.0285390626069505	NA	NA	NA	NA	NA	NA	NA	0.0351145154247724	0.0223605032708122
A0A1W6IYI5	NA	NA	NA	0.0123035382389722	NA	NA	NA	NA	0.00757132252125889	NA	NA	NA	NA	NA	NA	NA	NA	NA	NA	NA	NA	NA	NA	NA	NA	NA	NA	NA	NA	NA	NA	NA	NA
A0A1W6IYI8	NA	NA	NA	NA	0.0533008524541501	NA	NA	NA	0.0146398615453348	NA	NA	0.0262318301520738	NA	NA	NA	NA	NA	NA	NA	NA	NA	NA	NA	NA	NA	NA	NA	NA	NA	NA	NA	NA	NA
A0A1X7SC65	NA	NA	0.0153899991896476	0.0166736480998084	NA	0.0130790838483466	NA	NA	0.016833779647946	NA	NA	NA	0.0299375165923489	NA	NA	NA	NA	NA	NA	NA	NA	NA	NA	NA	NA	NA	NA	NA	NA	NA	NA	NA	NA
A0A1X8XL64	NA	0.0127596034180392	0.0346649994224597	0.0411906620530233	0.0167332465952597	0.0132650590386895	0.0118978060270005	0.0184494643744943	NA	NA	0.0225355058473915	NA	0.0440480508891001	0.007788162	0.0312527388621629	0.0330801934271639	0.0316444164815871	0.0571955984783586	0.00981365408628409	0.032738805258048	0.0652973024864494	NA	0.0153350902992495	0.0090395920531247	0.0150745683686023	0.0280147543962954	0.00836254471616026	0.0181443577061928	0.115877206815989	0.00579690292650028	0.0448654353183189	0.0243543095781645	0.00592622999626853
A0A223PQH6	NA	NA	NA	NA	NA	NA	NA	NA	NA	NA	0.000390900573432252	NA	NA	NA	NA	NA	NA	NA	NA	NA	NA	NA	NA	NA	NA	NA	NA	NA	NA	NA	NA	NA	NA
A0A286YER3	NA	NA	NA	NA	0.0097338813965655	NA	NA	0.0187859736838756	0.0181477568773159	NA	0.00562574318751767	NA	0.0266415361478293	0.036082474	NA	0.00541268554449941	0.0104452240436411	0.0122113645658281	NA	NA	NA	NA	0.00525659869203127	0.007326007	0.0101419954555163	NA	0.00461233140096643	NA	NA	NA	NA	NA	0.00956660656244103
A0A286YES1	0.00831651338944642	NA	NA	0.0167209083204104	0.0150223655003198	0.0167344058979465	NA	NA	0.0225582054322744	NA	NA	NA	NA	0.012320484	NA	0.0167881069533593	NA	0.00604337982551274	NA	0.0101966914638015	NA	0.0113143172079295	NA	NA	NA	NA	NA	NA	NA	0.0103378094435898	NA	0.00565842105715958	NA
A0A286YEY1	NA	0.00646303948174698	NA	NA	NA	0.00365081115215883	0.0055451118318346	0.00516209723210541	NA	NA	NA	0.0030118030102971	NA	0.00659382	0.00338714017740966	0.00515380874813925	NA	NA	NA	0.00971509444057644	NA	0.00824906049555867	NA	0.018700596142568	NA	NA	NA	NA	NA	0.00559552467084344	NA	NA	NA
A0A286YEY4	NA	0.00988628741211658	0.0120982106563778	0.00102117715421814	0.0188542379410088	NA	NA	NA	0.00353480377291878	NA	NA	NA	NA	NA	NA	NA	NA	NA	0.00421711230574721	0.00555334795223025	NA	NA	NA	0.00925583547520984	NA	NA	NA	NA	NA	NA	NA	NA	NA
A0A286YEZ8	NA	NA	NA	NA	NA	0.00282916323041706	NA	NA	NA	NA	0.00290264395210507	NA	NA	NA	NA	NA	0.00239524038676176	NA	NA	NA	NA	NA	NA	NA	NA	NA	NA	NA	NA	NA	NA	NA	NA
A0A286YF22	NA	NA	NA	NA	NA	NA	NA	0.00877764620088591	NA	NA	NA	NA	0.00298754754563541	0.005804432	NA	NA	NA	NA	0.00151742954558874	NA	NA	0.00652295628177639	NA	0.00365124080002946	NA	NA	NA	NA	NA	NA	NA	NA	NA
A0A286YF78	NA	NA	NA	NA	NA	NA	NA	NA	NA	NA	NA	NA	NA	NA	NA	NA	NA	NA	NA	NA	NA	NA	0.00154512198069129	NA	NA	NA	NA	NA	NA	NA	NA	NA	NA
A0A286YFA2	NA	NA	0.00691982808078814	NA	NA	NA	NA	NA	NA	NA	NA	NA	NA	NA	NA	NA	NA	NA	NA	NA	NA	NA	NA	NA	NA	NA	NA	NA	NA	NA	NA	NA	NA
A0A286YFF7	NA	NA	NA	NA	0.00726297357951274	NA	NA	NA	NA	NA	NA	NA	NA	NA	0.00414893690792243	NA	NA	NA	NA	NA	NA	NA	NA	NA	NA	NA	0.00344150906923892	NA	NA	NA	NA	NA	NA
A0A286YFJ8	NA	NA	NA	NA	0.0139226638981678	0.0048352975055815	NA	NA	0.0182438587035692	NA	NA	0.00373541777988494	NA	NA	NA	NA	NA	NA	0.02684815156028	0.0149452382676718	NA	0.00990262205374991	NA	0.0110660936346211	0.0311155664013998	NA	NA	NA	NA	NA	NA	0.0163479026985593	NA
A0A288Q8X7	NA	NA	NA	NA	NA	NA	NA	0.00503381066575339	NA	NA	NA	NA	0.0116157795801189	NA	NA	NA	NA	NA	NA	NA	NA	NA	NA	NA	NA	NA	NA	NA	NA	NA	NA	NA	NA
A0A288Q9P9	NA	NA	NA	NA	NA	NA	NA	NA	NA	NA	NA	NA	NA	NA	NA	NA	NA	NA	NA	0.00611175142110379	NA	NA	NA	NA	NA	NA	NA	NA	NA	NA	NA	NA	NA
A0A288QES5	NA	NA	NA	NA	NA	NA	NA	NA	NA	NA	NA	NA	NA	NA	NA	NA	NA	NA	NA	0.00694472817071772	NA	NA	NA	NA	NA	NA	NA	NA	NA	NA	NA	NA	NA
A0A2H2FJL5	NA	NA	NA	NA	NA	NA	NA	NA	NA	NA	NA	NA	NA	0.005235602	NA	NA	NA	NA	NA	NA	NA	NA	NA	NA	NA	NA	NA	NA	NA	NA	NA	NA	NA
A0A2I4PYB9	NA	NA	NA	NA	NA	NA	NA	NA	NA	NA	NA	NA	NA	NA	NA	NA	NA	NA	NA	NA	NA	0.0253589077780302	NA	NA	NA	NA	NA	NA	NA	NA	NA	NA	NA
A0A2I4PZD6	NA	NA	NA	NA	NA	NA	NA	NA	NA	NA	NA	NA	NA	NA	0.00610516000090777	NA	NA	NA	NA	NA	NA	NA	NA	NA	NA	NA	NA	NA	NA	NA	NA	NA	NA
A0A2Q2TH77	NA	NA	NA	NA	0.000527478301305279	NA	NA	0.00101801045264809	NA	NA	NA	NA	0.00115496222841825	0.001117318	NA	NA	NA	NA	NA	NA	NA	NA	NA	NA	NA	NA	NA	NA	NA	NA	NA	NA	NA
A0A2Q2TTZ9	NA	0.0263510638902791	NA	0.0491349041587331	0.0199556334137913	NA	NA	0.0308108113546817	0.037696997107187	NA	NA	NA	NA	NA	NA	0.0304365513741867	NA	NA	0.0152182762121239	0.0400806877214793	NA	NA	0.0073897116481223	NA	0.0427727650254221	NA	NA	0.0143069002010905	NA	NA	NA	NA	NA
A0A2R2Y2Q3	NA	NA	NA	NA	NA	NA	NA	NA	NA	NA	NA	NA	NA	NA	NA	NA	NA	NA	NA	NA	NA	NA	NA	NA	NA	NA	NA	NA	0.0086148987209403	NA	NA	NA	NA
A0A2R8Y3N3	NA	NA	NA	NA	NA	NA	NA	NA	NA	NA	NA	NA	NA	0.00228833	NA	NA	NA	NA	NA	NA	NA	NA	0.00233359358141975	NA	NA	NA	0.00409515933457524	0.00225898465793054	NA	NA	NA	NA	NA
A0A2R8Y414	NA	NA	0.00209434485018937	NA	NA	NA	NA	NA	NA	NA	NA	NA	NA	NA	NA	NA	NA	NA	NA	NA	NA	NA	NA	NA	NA	NA	NA	NA	NA	NA	NA	NA	NA
A0A2R8Y420	NA	NA	NA	NA	NA	NA	NA	NA	NA	NA	NA	NA	NA	NA	NA	NA	NA	NA	NA	NA	NA	NA	NA	NA	NA	NA	NA	NA	NA	0.0093270504806198	NA	NA	NA
A0A2R8Y478	NA	NA	NA	NA	NA	NA	NA	NA	NA	NA	NA	NA	NA	NA	NA	NA	NA	NA	NA	NA	NA	NA	NA	0.00823910310718978	NA	NA	NA	NA	NA	NA	NA	NA	NA
A0A2R8Y484	NA	NA	NA	NA	NA	NA	NA	NA	NA	NA	NA	NA	NA	NA	NA	NA	NA	NA	0.00690829587191805	NA	NA	NA	NA	NA	NA	NA	NA	NA	NA	NA	NA	NA	NA
A0A2R8Y488	NA	NA	NA	NA	0.00109154477474039	NA	NA	NA	NA	NA	NA	NA	NA	NA	NA	NA	NA	NA	0.00121394300643438	NA	NA	NA	NA	NA	NA	NA	NA	0.00190207311759087	NA	NA	NA	NA	NA
A0A2R8Y4B0	NA	NA	NA	NA	NA	NA	NA	NA	NA	NA	NA	NA	NA	NA	NA	NA	NA	NA	NA	NA	NA	NA	NA	0.00166033288618732	NA	NA	NA	NA	NA	0.00606327912590272	0.000841226696191408	NA	NA
A0A2R8Y4D6	NA	NA	0.00494750988268261	NA	NA	NA	NA	NA	NA	NA	NA	NA	NA	NA	NA	NA	NA	NA	NA	NA	NA	NA	NA	NA	NA	NA	NA	NA	NA	NA	NA	NA	NA
A0A2R8Y4F5	NA	NA	NA	NA	0.00287861700152241	NA	NA	NA	NA	NA	NA	NA	NA	NA	0.00164439539682183	0.0030121158192998	NA	NA	NA	0.00385043430327729	NA	NA	NA	0.00184241241340455	NA	NA	0.000454670822684784	NA	NA	NA	NA	NA	NA
A0A2R8Y4I5	NA	0.00129359786941889	NA	NA	NA	0.00165731600632955	NA	0.000792277811023307	0.00153072343607976	NA	NA	NA	NA	0.000869565	NA	NA	NA	NA	0.00152182720118798	NA	NA	NA	NA	NA	NA	NA	NA	NA	NA	NA	NA	NA	NA
A0A2R8Y4L2	0.00531533733583171	0.00646798835533624	0.00853445398435352	0.0044221412624058	0.0061577381001226	0.00520320052462634	NA	0.00561196896698139	0.0038268094703656	NA	NA	0.00455698902510376	0.00505609984598038	0.005072464	NA	0.0102750540536358	0.00440515976703393	NA	0.00913096530724991	0.00721452365711904	0.00759435994126687	0.00654186269164156	0.0102603296310594	0.00755251086575834	NA	NA	0.00664610218574154	0.00751112275364893	NA	NA	NA	0.00633588020146243	0.00605191858401021
A0A2R8Y4R4	NA	NA	NA	NA	0.000226695408523254	NA	NA	NA	NA	NA	NA	NA	NA	NA	NA	NA	NA	NA	NA	NA	NA	NA	NA	NA	NA	NA	NA	0.000790056766915161	NA	NA	NA	NA	NA
A0A2R8Y4T4	NA	NA	NA	NA	0.00483371949531023	NA	NA	0.0062192475652753	NA	NA	NA	0.00185025464958929	NA	NA	NA	NA	NA	NA	NA	NA	NA	NA	NA	NA	NA	NA	NA	NA	NA	NA	NA	NA	NA
A0A2R8Y542	NA	NA	NA	0.000577893656911811	0.000804704684410981	0.000906618581480567	NA	NA	NA	NA	0.000930165822214756	NA	0.00105718430651212	0.002725822	NA	NA	NA	NA	NA	0.000942807389382466	NA	NA	NA	NA	NA	NA	NA	NA	NA	NA	NA	0.000946268081844071	NA
A0A2R8Y543	NA	NA	NA	NA	0.00122452400528324	0.000660450754360694	NA	NA	NA	NA	NA	NA	NA	0.003062914	NA	NA	NA	NA	NA	0.00183150147344325	NA	NA	NA	NA	NA	NA	NA	0.00245159653320529	NA	NA	NA	NA	0.0020484791841124
A0A2R8Y586	NA	NA	NA	NA	NA	NA	NA	NA	NA	NA	NA	0.00330967331598887	0.00820390163367929	NA	NA	0.00224372000882704	NA	NA	NA	NA	NA	NA	NA	NA	NA	NA	NA	NA	NA	NA	NA	NA	0.00793128989136218
A0A2R8Y595	NA	NA	NA	NA	0.00361065614658514	NA	NA	0.0034842055957999	0.00084145912699527	NA	NA	0.00207313395765483	NA	0.003824092	NA	NA	NA	NA	NA	NA	NA	NA	NA	NA	NA	NA	NA	NA	NA	NA	NA	0.00159219061921852	0.00177430386602138
A0A2R8Y5B3	NA	NA	0.00199092979472092	NA	0.0011013057750624	NA	NA	NA	NA	NA	NA	NA	NA	NA	NA	NA	NA	NA	NA	NA	NA	NA	NA	NA	NA	NA	NA	NA	NA	NA	NA	NA	NA
A0A2R8Y5D2	NA	NA	NA	NA	NA	NA	NA	NA	NA	NA	NA	NA	NA	0.00247619	NA	NA	NA	NA	NA	0.00294993898976311	NA	NA	NA	NA	NA	NA	NA	NA	NA	NA	NA	NA	NA
A0A2R8Y5D3	NA	NA	NA	NA	0.00475261670515162	NA	NA	0.00458617299640745	NA	NA	NA	NA	0.00346876406243726	0.003355705	0.00361987802012084	NA	NA	NA	NA	NA	NA	NA	NA	NA	NA	NA	NA	NA	NA	NA	NA	NA	NA
A0A2R8Y5E5	NA	NA	NA	NA	NA	0.181323658054954	NA	NA	NA	NA	NA	NA	0.0626479760177608	NA	NA	NA	NA	NA	NA	NA	NA	NA	0.0927072892678521	0.129204119147741	0.044716981036166	NA	NA	NA	NA	NA	NA	NA	NA
A0A2R8Y5M9	NA	NA	NA	NA	NA	NA	NA	0.000616732376409608	NA	NA	NA	NA	NA	NA	NA	NA	NA	NA	NA	NA	NA	NA	NA	NA	NA	NA	NA	NA	NA	NA	NA	NA	NA
A0A2R8Y5P9	NA	NA	NA	NA	NA	NA	NA	NA	NA	NA	NA	NA	NA	NA	NA	NA	NA	NA	NA	NA	NA	NA	0.00125126416331584	NA	NA	NA	NA	NA	NA	NA	NA	NA	NA
A0A2R8Y5S7	NA	NA	NA	NA	NA	NA	NA	0.0012538346561859	0.00107665625766739	NA	NA	NA	NA	NA	NA	NA	NA	NA	NA	NA	NA	NA	NA	NA	0.00150424097936327	NA	NA	NA	NA	NA	NA	0.00152791829483209	0.00127701056476346
A0A2R8Y5T0	NA	0.000387405560281271	NA	NA	NA	NA	NA	NA	0.000229210240208371	NA	NA	NA	NA	NA	NA	NA	NA	NA	NA	NA	NA	NA	NA	NA	NA	NA	NA	NA	NA	NA	NA	NA	NA
A0A2R8Y5T7	NA	NA	NA	NA	NA	NA	NA	NA	NA	NA	NA	NA	NA	0.002777778	NA	NA	NA	NA	NA	NA	NA	NA	NA	NA	NA	NA	NA	NA	NA	NA	NA	NA	NA
A0A2R8Y5V9	0.00657272798213547	0.0138099388607112	0.011781451994431	0.00611040701835367	0.0184083354673124	0.00896191259887858	NA	0.00918838534419778	0.0134773177901162	NA	0.00936415336486615	0.0172301781294541	0.0153424610667584	0.025972523	0.00782188596939938	0.00370485263234282	0.00663031345171255	NA	0.00784981104438288	0.00764596324271316	NA	0.0106249656257907	0.00691332847506371	0.0093268816334837	0.00297512219620034	NA	0.00526129295453437	0.00960099427590845	0.0157339226765777	0.00653854565364739	NA	0.0119105883547745	0.00826209216550773
A0A2R8Y5Y7	NA	0.0100575124877555	0.00677337684455859	NA	0.00638338923834636	0.00844258336416127	NA	0.00843629337912388	0.00232848231145419	NA	NA	NA	0.00741356274569772	0.013227513	NA	NA	NA	NA	0.0113432517391039	0.0141448775144212	NA	0.00447806115393839	0.0100719028074693	NA	NA	NA	0.0157811694324515	NA	NA	NA	NA	0.00550737892979081	0.0122336997237468
A0A2R8Y611	NA	NA	NA	NA	0.00132610431285177	NA	NA	NA	NA	NA	NA	NA	NA	NA	NA	NA	NA	NA	NA	NA	NA	NA	NA	NA	NA	NA	NA	NA	NA	NA	NA	NA	NA
A0A2R8Y619	NA	0.0135486095742096	NA	NA	NA	NA	0.0855563988257456	NA	NA	NA	NA	0.0221071257808159	NA	NA	0.0145357060265251	NA	NA	0.0105181219340204	NA	NA	NA	0.0163103580199919	NA	NA	NA	0.00577030210318464	NA	NA	NA	NA	NA	NA	NA
A0A2R8Y623	NA	NA	0.00740662686934259	0.00952897292953142	NA	0.00236042641512471	NA	NA	NA	NA	NA	NA	NA	NA	0.00797872482292776	NA	0.00149879705208433	NA	NA	0.00581841984941466	NA	0.00166933645991651	0.00703990257134014	0.00747532019024183	0.00582114575138658	NA	0.00794194400593596	0.007301598577631	NA	NA	NA	NA	0.0107529980365903
A0A2R8Y633	NA	NA	NA	NA	0.0163416896097171	NA	NA	0.0297866061991223	NA	NA	NA	NA	NA	0.009615385	NA	NA	NA	NA	0.0100967410897827	NA	NA	NA	NA	NA	NA	NA	NA	NA	NA	NA	NA	NA	NA
A0A2R8Y688	NA	NA	NA	NA	0.00264477976610462	NA	NA	NA	NA	NA	NA	NA	NA	NA	NA	0.00367668474517726	NA	NA	NA	NA	NA	NA	NA	NA	NA	NA	NA	NA	NA	NA	NA	NA	NA
A0A2R8Y6A7	NA	NA	NA	NA	NA	NA	NA	0.00532818524412457	NA	NA	NA	NA	NA	NA	NA	NA	NA	NA	NA	NA	NA	NA	NA	NA	NA	NA	NA	NA	NA	NA	NA	NA	NA
A0A2R8Y6G6	0.0103285734748052	0.00769336218405802	0.0216148301272269	0.0134394413942118	0.0166580260871678	0.00748600902688466	0.0211011910874188	0.0142622187654724	0.00886120520101915	0.00673989544442408	0.00989502606498013	0.010318880107059	0.0236820388573857	0.020504376	0.00890651121886825	0.0151112550418713	0.00613600597110457	0.00693689026129684	0.0221325920839346	0.0236003714564706	NA	0.00910057567507387	0.0155123444111775	0.0265870930247358	0.013217815732885	0.00230228735320842	0.00720624933778384	0.0144238479907323	0.00408125693776059	NA	0.00492227570250453	0.0164349614538707	0.0127614978826221
A0A2R8Y6H2	NA	NA	0.00038530296117477	NA	0.0008880612478109	NA	NA	NA	NA	NA	NA	NA	0.00070001698356875	0.000955992	0.000608760377508414	NA	NA	NA	NA	0.000208093463977065	NA	0.000636834780043481	NA	NA	NA	NA	NA	NA	NA	NA	NA	0.000313286778317178	NA
A0A2R8Y6I8	0.0493950469499945	0.0300532795273476	NA	0.092462955610207	0.0715292826204994	NA	0.0478896007473381	NA	0.0800151087879617	NA	NA	0.065712060849373	0.12529595100183	0.090909091	NA	NA	NA	NA	0.0954600938531838	0.0670440600044405	NA	NA	0.0618048598518281	NA	0.0894339630561056	NA	NA	0.0299144266162699	NA	NA	NA	0.100935229587457	NA
A0A2R8Y6J3	NA	0.0162850282322579	0.0124443271584487	0.00501030755367563	0.0250295435756633	0.00786033612555372	NA	0.0284417679951362	0.010839485226161	NA	0.00604836731661145	0.0215425497383521	0.019731797787864	0.018883415	NA	0.0051727140469474	NA	NA	0.0146560241830787	0.00867361824168273	0.00860444674224642	0.00555897200000431	0.018419674480628	NA	0.0072692634310637	NA	0.0139581723479269	NA	NA	NA	0.00709448550747094	0.0218775867496319	0.0200971120614896
A0A2R8Y6J9	NA	NA	NA	NA	NA	NA	NA	NA	NA	NA	NA	NA	NA	NA	NA	NA	NA	NA	NA	NA	NA	NA	0.00294734114484915	NA	NA	NA	NA	NA	NA	NA	NA	NA	NA
A0A2R8Y6P0	NA	NA	NA	NA	NA	NA	NA	NA	NA	NA	NA	NA	NA	NA	0.00140641927253771	NA	NA	NA	NA	NA	NA	NA	NA	NA	NA	NA	NA	NA	NA	NA	NA	NA	NA
A0A2R8Y738	NA	0.0167688594703874	0.0302416538762605	0.0147404715527477	0.0250870813584668	0.0131685941271939	0.015269148614058	NA	NA	NA	NA	0.027499068936508	0.0149810380355078	0.028985507	0.0195420933185676	0.00760913810606194	NA	NA	0.0193081872747183	0.0280564816262809	NA	0.016354658421811	0.0270956083566683	0.00686591957182378	NA	NA	0.0197221739457563	0.0166913835679389	NA	NA	NA	0.00301708533438269	0.0168108852649042
A0A2R8Y765	NA	NA	NA	NA	NA	NA	NA	NA	NA	NA	NA	NA	NA	NA	NA	NA	NA	NA	NA	0.00199679944036052	NA	NA	NA	NA	NA	NA	NA	NA	NA	NA	NA	NA	NA
A0A2R8Y793	0.0105742623661994	0.0106112408627234	0.012635137757238	NA	0.0438411429972736	0.0139494405268217	0.0238294243153884	0.0243624827828457	NA	0.00549665268285316	0.0242274503710421	NA	0.0227475175642997	0.011440476	NA	0.00867208443631241	0.0114755407589869	0.00493720145926078	NA	NA	NA	NA	0.00968610874744276	0.0152410131156781	0.0190114364829233	0.00776842114493569	0.0237845713542461	0.0111816063336633	0.00837868624721103	0.012357898270738	0.0237836328656748	0.0085792178160156	0.0116868496002885
A0A2R8Y798	NA	NA	NA	NA	NA	NA	NA	NA	NA	NA	NA	NA	NA	NA	NA	NA	NA	NA	NA	NA	NA	NA	NA	NA	NA	NA	NA	0.0669869489837561	NA	NA	NA	NA	NA
A0A2R8Y7C0	0.0704846328202525	0.0917886695780685	0.0746764756915305	NA	0.0819704220425251	0.0284051179949388	NA	NA	0.0454471033869652	0.0740636840215352	0.0323244091044347	NA	0.0123355803871736	NA	NA	NA	NA	0.015068962399419	NA	0.0686185318508649	NA	0.498099195755231	0.0348520910853221	0.114277349056062	0.0742062240904511	NA	NA	NA	NA	NA	NA	NA	0.065222524877396
A0A2R8Y7I4	NA	NA	NA	NA	NA	NA	NA	NA	NA	NA	NA	NA	NA	0.004166667	NA	NA	NA	NA	NA	NA	NA	NA	0.0169963366887033	NA	NA	NA	0.00745660238682277	NA	NA	NA	NA	0.00693929676870959	NA
A0A2R8Y7M3	NA	NA	NA	NA	NA	NA	NA	NA	NA	NA	NA	NA	NA	NA	NA	NA	NA	NA	NA	NA	NA	NA	NA	NA	NA	NA	NA	NA	NA	NA	0.00196343644306168	NA	NA
A0A2R8Y7R2	NA	NA	NA	0.0219673206782412	0.0434096724146511	0.0144950022178286	0.0465726598921836	NA	NA	0.0264747275779116	NA	NA	0.0298052919316452	0.046546547	NA	0.0476942130688671	0.0208490361045677	0.0511097850387551	NA	NA	NA	NA	0.0528510154808817	NA	NA	NA	NA	NA	0.0325183406295502	NA	NA	NA	NA
A0A2R8Y7S8	NA	NA	NA	NA	NA	NA	NA	0.00173546620192898	NA	NA	NA	NA	NA	0.000634921	NA	NA	NA	NA	NA	NA	NA	NA	NA	NA	NA	NA	NA	NA	NA	NA	NA	NA	NA
A0A2R8Y7U1	NA	NA	NA	NA	0.0101718451499381	NA	NA	NA	NA	NA	NA	NA	NA	0.003802281	NA	NA	NA	NA	0.00731981689022028	0.00420618583870257	NA	NA	0.0124079713953881	NA	NA	NA	0.0136090082775386	NA	NA	NA	NA	0.00791554761008747	NA
A0A2R8Y7X9	NA	NA	NA	NA	NA	NA	NA	NA	NA	NA	NA	NA	NA	NA	NA	NA	NA	NA	NA	NA	NA	NA	NA	NA	NA	NA	0.00790583824094245	NA	NA	NA	NA	NA	NA
A0A2R8Y7Y3	NA	NA	NA	NA	NA	NA	NA	NA	NA	NA	NA	NA	NA	NA	NA	NA	NA	NA	NA	NA	NA	NA	NA	NA	NA	NA	NA	NA	NA	0.0067157566950358	NA	NA	NA
A0A2R8Y7Y9	NA	NA	NA	NA	NA	NA	NA	NA	NA	NA	NA	NA	NA	0.012396694	0.0565470198117196	0.00650864264339196	NA	NA	0.0216954758279935	NA	NA	0.00837693548939244	0.0168558711468023	0.0285162629896166	0.0054202403044638	0.00412889593061372	0.0221849332239841	0.0397046033177226	NA	0.041610875996255	0.0134892938966771	NA	NA
A0A2R8Y7Z3	NA	NA	NA	NA	0.00443280090034685	NA	NA	NA	NA	NA	NA	NA	NA	NA	NA	NA	NA	NA	NA	NA	NA	0.00176599567783466	NA	NA	NA	NA	NA	NA	NA	NA	NA	NA	NA
A0A2R8Y811	NA	0.0368152676689404	0.0453101936265187	0.02157468940506	0.0661748045994006	0.0245995760397003	0.0271374409502772	0.0485930509206524	0.0360067989985911	NA	0.0248044137402702	0.0715831206258369	0.0856151706193022	0.067424242	0.0326885921855653	0.0286380278409368	0.0422161156161264	NA	0.0432752422807612	0.0587593292212283	NA	0.0256470776205991	0.030902429416024	0.0258408236400489	0.031301887217203	0.0272507155401135	0.0332157754887455	0.0209400986313889	NA	NA	NA	0.0397432469467163	0.0414770390829726
A0A2R8Y891	NA	NA	NA	0.000690022003660891	NA	NA	NA	NA	NA	NA	NA	NA	NA	NA	NA	NA	NA	NA	0.000712388705244452	NA	NA	NA	NA	0.0010713441929749	NA	NA	NA	NA	NA	NA	NA	NA	NA
A0A2R8YCI2	NA	NA	NA	NA	NA	NA	NA	NA	NA	NA	NA	0.0172103016768417	0.0123058524505189	NA	NA	NA	NA	NA	NA	NA	NA	NA	NA	NA	NA	NA	NA	NA	NA	NA	NA	NA	NA
A0A2R8YCS7	NA	NA	NA	NA	NA	NA	NA	NA	NA	NA	NA	NA	NA	NA	NA	NA	NA	NA	NA	NA	NA	NA	NA	0.00129204085037854	NA	NA	NA	NA	NA	NA	NA	NA	NA
A0A2R8YD12	NA	NA	NA	NA	NA	NA	NA	0.00320172568524874	NA	NA	NA	NA	NA	NA	NA	NA	NA	NA	NA	NA	NA	NA	NA	NA	NA	NA	NA	NA	NA	NA	NA	NA	NA
A0A2R8YD50	NA	NA	0.0016307877704111	NA	NA	NA	NA	NA	NA	NA	NA	NA	NA	NA	NA	NA	NA	NA	NA	NA	NA	NA	NA	NA	NA	NA	NA	NA	NA	NA	NA	NA	NA
A0A2R8YDF1	NA	NA	NA	NA	NA	NA	NA	NA	NA	NA	NA	NA	NA	NA	NA	NA	NA	NA	NA	NA	NA	NA	NA	NA	NA	NA	NA	0.00493588044104334	NA	NA	NA	NA	NA
A0A2R8YDH3	NA	NA	NA	NA	NA	NA	NA	NA	NA	NA	NA	0.00376475322074688	NA	NA	NA	NA	NA	NA	NA	NA	NA	NA	NA	NA	NA	NA	NA	NA	NA	NA	NA	NA	NA
A0A2R8YDI9	NA	NA	0.00581894594497442	NA	NA	NA	NA	NA	NA	NA	NA	NA	NA	NA	NA	NA	NA	NA	NA	NA	NA	NA	NA	0.0107670096131462	NA	NA	NA	NA	NA	NA	NA	NA	NA
A0A2R8YDT1	NA	NA	NA	NA	NA	NA	NA	NA	NA	NA	NA	NA	NA	0.002793296	NA	NA	NA	NA	NA	NA	NA	NA	NA	NA	NA	NA	NA	NA	NA	NA	NA	NA	NA
A0A2R8YE05	NA	NA	NA	NA	NA	NA	NA	NA	NA	NA	NA	NA	NA	NA	NA	NA	NA	0.00262058008722123	NA	NA	NA	NA	NA	NA	NA	NA	NA	NA	NA	NA	NA	NA	NA
A0A2R8YEA7	NA	NA	NA	NA	NA	NA	NA	NA	NA	NA	NA	NA	NA	NA	NA	NA	NA	NA	NA	NA	NA	NA	NA	NA	0.0501285906949016	NA	NA	NA	NA	NA	NA	NA	NA
A0A2R8YEM3	NA	NA	NA	NA	NA	NA	NA	NA	NA	NA	NA	NA	NA	NA	NA	NA	NA	NA	NA	NA	NA	NA	0.0241368089617062	NA	0.00436585931353993	NA	NA	0.0147979057925481	NA	NA	NA	NA	NA
A0A2R8YEP4	NA	NA	NA	NA	NA	NA	NA	NA	NA	NA	NA	NA	NA	0.005102041	0.0202937705434305	NA	NA	NA	NA	0.0056440154219743	NA	NA	NA	0.0166970618853526	NA	NA	NA	0.0144382893897267	NA	0.0254883835373181	0.0107768608750074	0.018056333760172	NA
A0A2R8YEU4	NA	NA	NA	NA	NA	NA	NA	NA	NA	NA	NA	NA	0.022692062077473	NA	NA	NA	NA	NA	NA	NA	NA	NA	NA	NA	NA	NA	NA	NA	NA	NA	NA	NA	NA
A0A2R8YF87	NA	NA	NA	NA	NA	NA	NA	NA	NA	NA	NA	NA	NA	NA	NA	NA	NA	NA	NA	NA	NA	NA	NA	NA	NA	NA	NA	0.00154972726665917	NA	NA	NA	NA	NA
A0A2R8YFE2	0.0627598471546856	0.0265026809138672	0.0206699441613606	0.0125527238699075	0.025415524195574	NA	0.0505669738778966	0.0241555647632419	NA	0.00897618582748949	0.0483529083155556	NA	0.0218950713840611	NA	NA	NA	0.0176345795048585	0.0248645544505464	0.0232608459099679	0.0229171203165358	NA	NA	0.0286857995224556	0.044309805118708	0.0285377362517165	0.00843200813998194	0.0285521814356397	NA	0.0411053259716644	0.0531378370558344	NA	0.0201915141031024	0.0264292655480595
A0A2R8YFH5	NA	NA	NA	NA	NA	NA	NA	NA	NA	NA	NA	NA	NA	NA	NA	NA	NA	NA	NA	NA	NA	NA	NA	NA	NA	NA	NA	NA	NA	NA	NA	0.000688194514405336	0.00102254606347191
A0A2R8YFZ7	NA	NA	NA	NA	NA	NA	NA	NA	NA	NA	NA	NA	0.000468440088655831	NA	NA	NA	NA	NA	NA	NA	NA	NA	NA	NA	NA	NA	NA	NA	NA	NA	NA	0.000377363414526896	NA
A0A2R8YGC7	NA	NA	NA	NA	NA	NA	NA	NA	NA	NA	NA	NA	NA	NA	NA	NA	NA	NA	NA	NA	NA	NA	NA	NA	NA	NA	NA	0.00126561009106401	NA	NA	NA	NA	NA
A0A2R8YGF8	NA	0.0118630995950927	NA	NA	0.00741109378521169	NA	0.0229559263218125	NA	0.0176026981175831	NA	NA	NA	0.0244787649257487	NA	NA	NA	NA	NA	0.0135081457664307	0.0101962843722717	NA	NA	NA	NA	NA	NA	NA	NA	NA	0.00373570890103144	NA	0.00907615669909708	0.021843357174742
A0A2S1CVU8	0.0678476264958428	NA	NA	NA	0.134710075517724	NA	NA	0.104102955501849	NA	NA	NA	NA	NA	NA	0.500719779098396	NA	0.0879328006298183	NA	NA	NA	0.2858240986866	NA	NA	NA	NA	NA	0.152362778631482	0.274938062866661	NA	0.0444091928517809	0.0942231122905154	0.0861109217240985	0.0991183213235957
A0A2U3TZH3	NA	NA	0.00225971389925551	NA	NA	NA	NA	0.0129236836876433	0.00728269930250248	NA	0.000645031989356682	NA	NA	0.007289204	NA	NA	NA	NA	NA	0.00224159419694868	NA	NA	NA	NA	NA	0.00236215799337023	NA	0.00194479118845593	NA	NA	NA	NA	0.00369096342493651
A0A2U3TZI3	NA	NA	NA	NA	NA	NA	NA	NA	NA	NA	NA	0.000574893755918853	NA	NA	0.00114392699806659	NA	NA	NA	NA	NA	NA	NA	NA	NA	NA	NA	NA	NA	NA	NA	NA	NA	NA
A0A2U8J8C7	NA	NA	NA	NA	0.00890741982199974	NA	NA	NA	NA	NA	NA	NA	NA	NA	NA	NA	NA	NA	NA	NA	NA	NA	NA	NA	NA	NA	NA	NA	NA	NA	NA	NA	NA
A0A2U8J8D8	NA	NA	NA	0.0128745888974721	NA	NA	NA	NA	NA	NA	NA	NA	NA	NA	NA	NA	NA	NA	NA	NA	NA	NA	NA	NA	NA	NA	NA	NA	NA	NA	NA	NA	NA
A0A342Y255	NA	NA	NA	NA	NA	NA	NA	NA	NA	NA	NA	NA	NA	NA	NA	NA	NA	NA	NA	NA	NA	NA	0.00149090638715251	NA	NA	NA	NA	NA	NA	NA	NA	NA	NA
A0A384DVL6	NA	NA	NA	NA	NA	NA	NA	NA	NA	NA	NA	NA	NA	0.000596659	NA	NA	NA	NA	NA	NA	NA	NA	NA	NA	NA	NA	NA	NA	NA	NA	NA	NA	NA
A0A384MDQ7	NA	NA	NA	0.00144064136201649	NA	NA	NA	NA	NA	NA	NA	NA	NA	NA	NA	NA	NA	NA	NA	NA	NA	NA	NA	NA	NA	NA	NA	NA	NA	NA	NA	NA	NA
A0A384MDT2	NA	NA	NA	NA	NA	NA	NA	NA	NA	NA	NA	NA	NA	NA	NA	NA	NA	NA	NA	NA	NA	NA	NA	NA	NA	NA	NA	0.00390408596799981	NA	NA	NA	NA	NA
A0A384MDX9	NA	NA	NA	NA	NA	NA	NA	NA	0.00121234971973954	NA	NA	NA	NA	NA	NA	NA	NA	NA	NA	NA	NA	NA	NA	NA	NA	NA	NA	NA	NA	NA	NA	NA	NA
A0A384MR03	NA	NA	0.00535625937953738	0.00250520869983339	0.00282325084773228	0.00406876407024308	NA	0.00429064585160255	0.0038201659759198	0.00577082206060026	0.00213162959996932	NA	0.00157027780479996	0.003146701	NA	0.003759983986671	NA	NA	0.00381207016400831	0.00228063294717462	NA	NA	0.00298763775869847	0.000771074852907782	0.00671434035802543	NA	0.00252437109836593	0.00578423489184766	NA	NA	NA	0.00158122042330399	0.0023762887844583
A0A384N5Y3	NA	NA	NA	NA	0.0011196692588371	0.000774085638234926	NA	NA	NA	NA	0.000735361777298474	0.000701325862957185	0.00206158832005212	NA	0.00209325442463516	NA	NA	NA	NA	0.000715541905565059	NA	0.00206813486788595	0.000989437641423303	0.00122573975646107	NA	NA	NA	0.000957803650880107	NA	NA	NA	0.00224427441965441	NA
A0A384N6C7	NA	NA	NA	NA	NA	NA	NA	0.00510227037855769	NA	NA	NA	NA	NA	NA	NA	NA	NA	NA	NA	NA	NA	NA	NA	NA	NA	NA	NA	NA	NA	NA	NA	NA	NA
A0A384NL58	NA	NA	NA	NA	NA	NA	NA	NA	NA	NA	NA	NA	NA	0.022384939	NA	NA	0.0159958461624939	NA	NA	NA	NA	NA	NA	NA	NA	NA	NA	NA	NA	NA	NA	NA	NA
A0A384NQ21	NA	NA	NA	NA	NA	NA	NA	NA	NA	NA	NA	NA	0.00137458964846321	NA	NA	NA	NA	NA	NA	NA	NA	NA	NA	NA	NA	NA	NA	NA	NA	NA	NA	NA	NA
A0A384NYN5	NA	NA	NA	NA	NA	NA	NA	NA	NA	NA	NA	0.00150499290448909	NA	NA	NA	NA	NA	NA	NA	NA	NA	NA	NA	NA	NA	NA	NA	NA	NA	NA	NA	NA	NA
A0A384P5G6	NA	NA	NA	NA	NA	NA	NA	NA	NA	NA	NA	0.00202193788851604	NA	NA	NA	NA	NA	NA	NA	NA	NA	NA	NA	NA	NA	NA	NA	NA	NA	NA	NA	NA	NA
A0A385HVY8	NA	NA	NA	NA	NA	NA	NA	NA	NA	NA	NA	NA	NA	NA	0.072194493929752	NA	NA	NA	NA	NA	NA	NA	NA	NA	NA	NA	NA	NA	NA	NA	NA	NA	NA
A0A385HVZ2	NA	NA	NA	NA	NA	NA	NA	NA	NA	NA	NA	NA	NA	NA	0.058565629802664	NA	NA	NA	NA	NA	NA	NA	NA	NA	NA	NA	NA	NA	NA	NA	NA	NA	NA
A0A385HW02	NA	NA	NA	NA	NA	NA	NA	NA	NA	NA	NA	0.0194652034733441	NA	NA	NA	NA	NA	NA	NA	NA	NA	NA	NA	NA	NA	NA	NA	NA	NA	0.0365240630447369	NA	NA	NA
A0A385HW63	NA	NA	NA	NA	NA	NA	NA	NA	NA	NA	NA	NA	NA	NA	NA	NA	NA	0.018901634319773	NA	NA	NA	NA	NA	NA	NA	NA	NA	NA	NA	NA	NA	NA	NA
A0A3B3IRH9	NA	NA	NA	NA	NA	NA	NA	NA	NA	0.0105314649023892	NA	NA	NA	NA	NA	NA	NA	NA	NA	NA	NA	NA	NA	NA	NA	NA	NA	NA	NA	NA	NA	NA	NA
A0A3B3IRI2	NA	NA	0.00250399660955545	NA	0.00577131087998435	NA	NA	NA	NA	NA	NA	NA	NA	NA	NA	NA	NA	NA	0.0012836933104408	0.00405706754763695	NA	NA	NA	NA	NA	NA	NA	NA	NA	NA	NA	NA	NA
A0A3B3IRK6	NA	0.00252999509091515	0.00606700975991883	NA	0.0034390011475	0.00474329961120161	NA	0.00942626685604179	NA	NA	NA	0.0018439605841619	0.00796950482808819	0.007598397	NA	0.00178581779477074	NA	0.00201445954700345	0.00267872669215611	0.00391945512342029	NA	NA	0.00173431975809824	0.00416275551615936	0.000836542036759875	NA	0.00304351170786598	NA	NA	NA	NA	NA	NA
A0A3B3IRN5	NA	0.017900398093769	0.0257274378983171	0.0458996722238856	0.0130532701621935	0.0202213479698254	NA	NA	0.0121681964376485	NA	0.0141453743441981	0.00749480830509281	NA	NA	NA	NA	NA	NA	0.0112909786509031	0.0351374715180692	NA	NA	0.00939889581772623	NA	NA	NA	NA	NA	NA	NA	NA	0.0196986496976746	NA
A0A3B3IRQ9	NA	NA	0.000501044499714959	NA	NA	NA	NA	NA	NA	NA	NA	NA	NA	0.000978474	NA	NA	NA	NA	NA	0.00216482757547153	NA	NA	0.000748370784673885	NA	NA	NA	NA	NA	NA	NA	NA	NA	NA
A0A3B3IRT8	NA	0.00931228353180622	0.0160271439980077	0.00477508253454213	0.0147760017422408	0.00374565328944238	0.0049463441249765	0.00427755761696183	NA	NA	NA	0.00509037122392473	0.0161767070390385	0.002347418	0.00506443017025395	0.00739479649816275	NA	0.00278052226221731	0.00246493216605425	0.0103871074205921	NA	0.00794698224296308	0.00239385035275034	0.00889668394176651	0.00230932783927228	NA	NA	0.00463462983726123	NA	NA	NA	0.00781892594830257	0.00217831204509105
A0A3B3IRW9	NA	NA	NA	NA	NA	NA	NA	NA	0.00322405229583408	NA	NA	0.00198580420644312	NA	0.001831502	NA	NA	NA	NA	NA	NA	NA	NA	NA	NA	NA	NA	NA	NA	NA	NA	NA	NA	NA
A0A3B3IS57	NA	NA	NA	NA	NA	NA	NA	0.00132238001424298	NA	NA	NA	NA	NA	NA	NA	NA	NA	NA	NA	NA	NA	NA	NA	NA	NA	NA	NA	NA	NA	NA	NA	NA	NA
A0A3B3IS75	NA	NA	NA	NA	NA	NA	NA	NA	NA	NA	NA	NA	NA	0.007042254	0.0227899346874192	NA	0.00713511856041013	NA	NA	NA	NA	NA	NA	NA	NA	NA	0.012602708725719	NA	NA	NA	NA	0.00586419508576366	0.0130698713425854
A0A3B3IS84	NA	NA	0.00135811195470397	NA	0.0012049123069191	NA	NA	0.000420258522046719	NA	NA	NA	0.00200045891588613	0.00254290717232212	0.000461255	NA	NA	NA	NA	NA	0.00257798897262748	NA	NA	0.00036958261449033	0.0008740743958372	NA	NA	NA	NA	NA	NA	NA	NA	0.00057070150165129
A0A3B3ISS6	NA	NA	NA	NA	NA	NA	NA	NA	NA	NA	NA	NA	0.00131848396962169	NA	NA	0.00267872669215611	NA	NA	NA	NA	NA	NA	NA	0.00604270965079574	NA	NA	NA	NA	NA	NA	NA	NA	NA
A0A3B3ISV3	NA	NA	0.00293168235366815	NA	NA	NA	NA	NA	NA	NA	NA	NA	NA	NA	NA	NA	NA	NA	NA	NA	NA	NA	NA	NA	NA	NA	NA	NA	NA	NA	NA	NA	NA
A0A3B3ISW8	NA	NA	NA	NA	NA	NA	NA	NA	NA	NA	NA	NA	NA	NA	NA	NA	NA	NA	0.00681857760733976	NA	NA	NA	NA	NA	NA	NA	NA	NA	NA	NA	NA	NA	NA
A0A3B3ISX1	NA	NA	NA	NA	0.0018120176348404	NA	NA	NA	NA	NA	NA	NA	NA	NA	NA	NA	NA	NA	NA	NA	NA	NA	NA	NA	NA	NA	NA	NA	NA	NA	NA	NA	NA
A0A3B3IT11	NA	NA	NA	NA	NA	NA	NA	NA	NA	NA	NA	NA	NA	NA	0.00256838900075029	NA	NA	NA	NA	NA	NA	NA	NA	NA	NA	NA	NA	NA	NA	NA	NA	NA	NA
A0A3B3ITC2	NA	NA	NA	NA	NA	0.00629861141333423	NA	0.00239768349652401	0.0015441512515627	NA	NA	NA	0.00408036113413271	NA	NA	NA	NA	NA	NA	NA	NA	NA	NA	NA	NA	NA	NA	NA	NA	NA	NA	NA	NA
A0A3B3ITF0	NA	NA	NA	NA	NA	NA	NA	NA	NA	NA	NA	NA	NA	NA	NA	NA	NA	NA	NA	NA	NA	NA	NA	NA	NA	NA	NA	NA	NA	NA	NA	0.00341276932582742	NA
A0A3B3ITG6	NA	NA	NA	NA	NA	NA	NA	NA	NA	NA	NA	NA	NA	0.001222494	NA	NA	NA	NA	NA	NA	NA	NA	NA	NA	NA	NA	NA	NA	NA	NA	NA	NA	NA
A0A3B3ITI4	NA	NA	0.00284481833616268	NA	0.0104909613125259	0.00664853387071853	0.0146329338250794	0.00379633243060961	0.00366735944250295	NA	NA	0.0030118030102971	0.00861409630188662	0.033333333	0.00299645455335771	0.00680595062343795	NA	0.00658056943288113	0.00875050824443766	0.00768213133391851	NA	0.0156732140387844	0.0141636137372894	0.0131596789424547	0.0109308175866184	NA	NA	NA	NA	NA	NA	NA	NA
A0A3B3ITJ4	NA	NA	0.00430308655029536	NA	0.0102264833359154	0.00111740051645285	NA	NA	NA	NA	0.0057321123776988	0.00658040908199866	0.00144774710389832	0.009803922	NA	NA	NA	NA	0.00294134695609299	0.00420903326695651	NA	NA	0.00357065934527655	NA	NA	NA	0.00751926290356252	NA	NA	NA	NA	0.00349880550632604	0.00519866042170714
A0A3B3ITK0	NA	NA	0.00290191588387086	0.00250170379904154	NA	0.00404586093390775	NA	0.00299403776948955	0.00103915765706206	0.00272093929300271	NA	NA	NA	NA	NA	NA	NA	NA	NA	NA	NA	NA	NA	0.00316950970070845	NA	NA	NA	NA	NA	NA	NA	NA	0.000867338112554858
A0A3B3ITK5	NA	NA	NA	NA	0.00726297357951274	NA	NA	NA	NA	NA	NA	NA	NA	NA	NA	NA	NA	NA	NA	NA	NA	NA	NA	NA	NA	NA	NA	0.0101248827028643	NA	NA	NA	NA	NA
A0A3B3ITK7	NA	NA	0	0.00666072322893049	0.00185498378696396	0.00287362995642987	0.000689961671551569	0.00109390034669117	NA	NA	NA	0.00319523300285699	NA	0.000982318	NA	NA	NA	NA	NA	NA	NA	NA	NA	NA	NA	NA	NA	NA	0.0034798944626498	NA	NA	NA	NA
A0A3B3ITL1	NA	NA	0.00492372333434228	0.00488986752692915	NA	NA	NA	NA	NA	NA	NA	NA	0.00248483541206201	NA	NA	NA	NA	NA	NA	0.00709119815438632	NA	NA	NA	0.00455527315210078	NA	NA	NA	NA	NA	NA	NA	NA	NA
A0A3B3ITZ9	NA	NA	NA	NA	NA	NA	NA	NA	NA	NA	NA	NA	0.000600983126371569	NA	NA	NA	NA	NA	NA	NA	NA	NA	NA	NA	NA	NA	NA	NA	NA	NA	NA	NA	NA
A0A3B3IU42	NA	NA	NA	NA	NA	NA	NA	NA	0.00850402143644187	NA	NA	0.01571375398779	NA	0.003220612	NA	NA	NA	NA	NA	NA	NA	NA	NA	NA	NA	NA	NA	NA	NA	NA	NA	NA	NA
A0A3B3IU79	NA	NA	NA	NA	NA	NA	NA	NA	NA	NA	NA	NA	NA	0.001676727	NA	NA	0.00977923713135278	0.00476660942315791	0.00690981216004729	NA	NA	0.0102013295622684	NA	NA	0.000659808094616879	NA	0.00318818530969025	0.00320561841137256	NA	0.00283405735096017	0.00386366336518245	0.00279247361244489	0.00435615268606111
A0A3B3IU96	NA	NA	NA	NA	NA	NA	NA	NA	NA	NA	NA	NA	0.00455370712311063	NA	NA	0.00462581916048546	NA	NA	NA	NA	NA	NA	NA	NA	NA	NA	NA	NA	NA	NA	NA	NA	NA
A0A3B3IUA7	NA	NA	0.00393897907712763	NA	NA	NA	NA	NA	NA	NA	NA	NA	NA	NA	NA	NA	NA	NA	NA	NA	NA	NA	NA	NA	NA	NA	NA	NA	NA	NA	NA	NA	NA
A0A3B3IUC7	NA	NA	NA	NA	NA	NA	NA	NA	NA	NA	NA	0.00467348724283188	NA	NA	NA	NA	NA	NA	NA	NA	NA	NA	0.00439560440395604	NA	NA	NA	NA	NA	NA	NA	NA	NA	NA
A0A3F2YNX0	NA	NA	NA	NA	NA	NA	NA	NA	NA	NA	NA	0.00195064960121446	0.00133897897292679	0.001295337	NA	NA	0.000874945537861976	NA	NA	NA	NA	NA	NA	NA	NA	NA	NA	NA	NA	NA	NA	NA	NA
A0A3F2YNY6	NA	NA	NA	NA	0.00204369362729658	NA	NA	NA	NA	NA	NA	NA	NA	NA	NA	NA	NA	NA	NA	NA	NA	NA	NA	NA	NA	NA	NA	NA	NA	NA	NA	NA	NA
A0A3G9CLN8	0.253387094423444	NA	NA	NA	NA	NA	NA	NA	NA	NA	NA	NA	0.0371068779676525	NA	0.156702663601095	NA	NA	0.114274110078667	0.093347809983649	NA	NA	NA	NA	NA	NA	0.129177469347738	NA	0.149399941930635	NA	NA	NA	0.282499599648167	NA
A0A481SHK9	NA	NA	NA	NA	NA	NA	NA	NA	NA	NA	NA	NA	NA	NA	NA	NA	NA	NA	0.0327073713581105	NA	NA	0.0330242619271405	NA	NA	NA	NA	NA	NA	NA	NA	NA	NA	NA
A0A494BXC7	NA	NA	NA	NA	0.00659348112678231	NA	NA	NA	NA	NA	NA	NA	NA	0.005586592	NA	NA	NA	NA	NA	NA	NA	NA	NA	NA	NA	NA	NA	NA	NA	NA	NA	NA	NA
A0A494BZX5	NA	NA	NA	NA	NA	NA	NA	0.000751749384062771	NA	NA	NA	NA	NA	NA	NA	NA	NA	NA	NA	NA	NA	NA	NA	NA	NA	NA	NA	NA	NA	NA	NA	NA	NA
A0A494BZZ2	NA	0.00867631856404849	0.0117249576619546	0.00394698005162927	0.0064577873599727	0.00862405005053545	0.00209874759841775	0.00750191551581832	NA	NA	0.00673009388943264	0.00664350044688317	0.00914456718962127	0.012835029	0.00849870840947871	NA	NA	NA	0.0038892286485908	0.00330545932374896	NA	0.0142879928236901	NA	NA	0.0018999835824719	NA	0.00534736481759244	0.0119460942527178	NA	0.00935908797267443	NA	0.00945057313295436	0.0102372011956223
A0A494C028	NA	NA	NA	NA	NA	NA	0.0027725559159173	NA	NA	NA	NA	NA	NA	NA	NA	NA	NA	NA	NA	NA	NA	NA	NA	NA	NA	NA	NA	NA	NA	NA	NA	NA	NA
A0A494C033	NA	NA	NA	NA	NA	NA	NA	NA	NA	NA	NA	NA	NA	0.005494505	NA	NA	NA	0.00260330175066636	NA	NA	NA	NA	NA	NA	0.00108106978471842	NA	NA	NA	NA	NA	NA	NA	NA
A0A494C060	NA	0.00075133223612325	0.000620687990772873	NA	NA	0.00344777768481078	NA	NA	NA	NA	NA	NA	NA	NA	NA	NA	NA	NA	NA	NA	0.000926283493013195	NA	NA	0.00068908889570043	NA	NA	NA	NA	NA	NA	NA	NA	NA
A0A494C0A4	NA	NA	NA	NA	NA	NA	NA	0.0113889963807091	NA	NA	NA	NA	0.0258422899393515	0.051041667	NA	NA	NA	NA	NA	NA	NA	NA	0.0127472522615824	NA	NA	NA	NA	NA	NA	NA	NA	NA	NA
A0A494C0A9	NA	NA	NA	NA	0.00423402036651118	NA	NA	0.00408573867319967	NA	NA	NA	NA	NA	0.006726457	0.00483732542193607	NA	NA	NA	NA	NA	NA	NA	NA	NA	NA	NA	NA	NA	NA	NA	NA	NA	NA
A0A494C0B4	NA	NA	NA	NA	NA	NA	NA	NA	0.00523908454064728	NA	NA	0.00645386312881564	NA	NA	NA	NA	NA	NA	NA	NA	NA	NA	NA	NA	NA	NA	NA	NA	NA	NA	NA	NA	NA
A0A494C0F7	NA	NA	NA	NA	NA	NA	NA	NA	NA	NA	NA	NA	NA	0.002325581	NA	NA	NA	NA	NA	NA	NA	NA	NA	NA	NA	NA	NA	NA	NA	NA	NA	NA	NA
A0A494C0G5	NA	NA	NA	NA	NA	NA	NA	NA	NA	NA	NA	0.000371097230199932	NA	NA	NA	NA	NA	NA	NA	NA	NA	NA	NA	NA	NA	NA	NA	NA	NA	NA	NA	NA	NA
A0A494C0L2	NA	NA	NA	NA	0.00431135396405174	NA	0.00481082747233533	NA	NA	NA	NA	NA	NA	0.00456621	NA	NA	NA	NA	NA	NA	NA	NA	NA	NA	NA	NA	NA	NA	NA	NA	NA	NA	NA
A0A494C0L6	NA	NA	NA	0.00351935164224756	0.00326708177618715	NA	0.00364557558815615	0.0139242635091107	0.00873059909955864	NA	0.00731687325823488	0.0265747304028586	0.0338814562778918	0.026073888	NA	NA	NA	0.00819724819835352	0.00545014332160919	0.00574166207775337	NA	NA	0.0126443329863828	0.00327853627126786	0.00340406125541879	NA	0.00928850176016095	0.00341583459782834	0.00306447416464633	NA	NA	0.00696330812434913	NA
A0A494C0Q7	NA	NA	NA	NA	0.00491763784969405	NA	NA	NA	NA	NA	NA	NA	NA	NA	NA	NA	NA	NA	NA	NA	NA	0.00587745484136736	NA	NA	NA	NA	NA	NA	NA	NA	NA	NA	NA
A0A494C0S0	NA	NA	NA	NA	NA	NA	NA	NA	NA	NA	NA	NA	NA	NA	NA	NA	NA	NA	NA	NA	NA	NA	NA	NA	0	NA	NA	NA	NA	NA	NA	NA	NA
A0A494C0T1	NA	NA	NA	NA	NA	NA	NA	NA	NA	NA	NA	NA	NA	NA	NA	NA	NA	NA	NA	0.00674528650797378	NA	NA	NA	NA	NA	NA	NA	NA	NA	NA	NA	NA	NA
A0A494C0X0	NA	NA	NA	NA	NA	NA	NA	NA	NA	NA	NA	NA	NA	0.008274232	NA	NA	NA	NA	NA	NA	NA	NA	NA	NA	NA	NA	NA	NA	NA	NA	NA	NA	NA
A0A494C105	NA	NA	NA	NA	NA	NA	NA	NA	NA	NA	NA	NA	NA	0.004310345	NA	NA	NA	NA	NA	NA	NA	NA	NA	NA	NA	NA	NA	NA	NA	NA	NA	NA	NA
A0A494C128	NA	NA	0.0035709010344294	NA	0.0018106787783443	NA	NA	NA	NA	NA	NA	NA	0.00216253450670481	NA	NA	NA	NA	NA	NA	NA	NA	NA	NA	NA	NA	NA	NA	NA	NA	NA	NA	NA	NA
A0A494C165	NA	NA	NA	NA	NA	NA	NA	NA	NA	NA	NA	NA	NA	0.004576659	NA	NA	NA	NA	NA	NA	NA	NA	NA	NA	NA	NA	NA	NA	NA	NA	NA	NA	NA
A0A494C166	NA	NA	NA	NA	NA	NA	NA	NA	NA	NA	NA	NA	NA	NA	NA	NA	NA	NA	NA	NA	0.0398487331967196	NA	NA	NA	NA	NA	NA	NA	NA	NA	NA	NA	NA
A0A494C189	0.021391556664191	NA	0.0181441150521272	0.0160172043882956	0.00743453982506429	0.0251283180031069	0.0269614682160913	NA	NA	NA	NA	0.0128060909251536	0.0162786073230358	NA	0.0212347152092694	0.0165363936733549	NA	NA	0.0238211773773868	0.0342610985901438	NA	0.037471466159069	0.0160595299024176	0.0198949472225118	0.00774624900877278	NA	0.0267146001310554	0.0272056401096275	0.0325429417412018	0.007326007	0.0176400053925685	0.0253530220913655	0.00913347340356493
A0A494C1A0	NA	NA	0.0012489443356418	NA	NA	0.00121619507430996	NA	0.000555560710169254	0.000715582158504733	NA	NA	NA	NA	0.00152439	0.000657758158728733	NA	NA	NA	NA	NA	NA	NA	NA	NA	NA	NA	NA	NA	NA	NA	NA	NA	NA
A0A494C1A5	NA	NA	NA	NA	0.0014799160749389	NA	NA	0.00142808721193046	NA	NA	NA	0.000212431484730767	0.000270034357109064	NA	NA	NA	NA	NA	NA	0.000494883915516412	NA	NA	NA	NA	NA	NA	NA	NA	NA	NA	NA	NA	NA
A0A494C1B1	NA	NA	NA	NA	0.00181574339487819	NA	NA	NA	NA	NA	NA	0.00208509430834038	0.00397573707277585	NA	NA	NA	NA	NA	NA	0.00425471933512258	NA	0.00434027479578292	NA	NA	NA	NA	0.00215094294457624	0.00189841563018406	NA	NA	NA	NA	NA
A0A494C1B7	NA	NA	NA	NA	NA	NA	NA	NA	0.000492262870644767	NA	NA	NA	NA	NA	NA	NA	NA	NA	NA	NA	NA	NA	NA	NA	NA	NA	NA	NA	NA	NA	NA	NA	NA
A0A494C1N0	NA	NA	NA	NA	0.0165646762535601	NA	NA	NA	NA	NA	NA	NA	0.0181349406710156	NA	NA	NA	NA	NA	NA	0.00646916340323037	NA	NA	NA	NA	NA	NA	NA	NA	NA	NA	NA	NA	NA
A0A494C1N7	NA	NA	NA	NA	NA	NA	NA	NA	NA	NA	NA	NA	0.0185024676511499	0.007889546	NA	NA	NA	NA	NA	NA	NA	NA	NA	NA	NA	NA	NA	NA	NA	NA	NA	NA	NA
A0A494C1S7	NA	NA	NA	NA	NA	NA	NA	NA	NA	NA	NA	0.00155188342086092	NA	NA	NA	NA	NA	NA	NA	NA	NA	NA	NA	NA	NA	NA	NA	NA	NA	NA	NA	NA	NA
A0A494C1T2	NA	NA	NA	NA	NA	NA	NA	0.00287093091869147	NA	NA	NA	NA	NA	NA	NA	0.000671823797542951	NA	NA	NA	NA	NA	NA	NA	NA	NA	NA	NA	NA	NA	NA	NA	NA	NA
A0A499FHX9	NA	NA	NA	NA	0.000606025178533761	NA	NA	0.0031189377038778	NA	NA	NA	NA	NA	NA	NA	NA	NA	NA	NA	NA	NA	NA	NA	NA	NA	NA	NA	NA	NA	NA	NA	0.00106895457605045	NA
A0A499FI31	NA	NA	NA	NA	NA	NA	NA	NA	NA	NA	NA	0.00124483277891184	NA	NA	NA	NA	NA	NA	NA	NA	NA	NA	NA	NA	NA	NA	NA	NA	NA	NA	NA	NA	NA
A0A499FI48	0.00189245778239077	0.00248195432204468	0.0062368225286633	0.00209926165150218	0.00619669995718274	0.00600504884576777	0.0016309156165059	0.00570205410611338	0.00590410731236739	NA	0.00126709886163111	0.00611418635029882	0.0109806556876626	0.007526783	0.00306139263251939	0.00605878914714084	0.00562010241456476	0.00381998945312339	0.00990711056813393	0.00718199505268737	NA	0.00696525613381246	0.00531464356014943	0.0053610699755366	0.00639786432836964	NA	0.00731809032492924	0.00165548146663679	0.00822569315779483	NA	0.00686154111663498	0.00444716536987174	0.00283275644732383
A0A499FIX8	NA	NA	NA	NA	NA	NA	0.00284749011586482	NA	NA	NA	NA	NA	NA	0.003378378	NA	NA	NA	NA	NA	NA	NA	NA	NA	NA	NA	NA	NA	NA	NA	NA	NA	NA	NA
A0A499FJ32	NA	NA	NA	NA	NA	NA	NA	NA	NA	NA	NA	NA	NA	0.008928571	NA	NA	NA	NA	NA	NA	NA	NA	NA	NA	NA	NA	NA	NA	NA	NA	NA	NA	NA
A0A499FJ41	NA	NA	0.0258573647240811	0.0145677316120087	NA	NA	NA	0.0340483540668682	NA	NA	NA	NA	NA	NA	NA	NA	NA	NA	NA	NA	NA	NA	NA	NA	NA	NA	NA	NA	NA	NA	NA	NA	NA
A0A499FJL1	NA	NA	NA	NA	NA	NA	NA	0.00150349785700583	NA	NA	NA	0.00178918974608011	NA	NA	NA	NA	NA	NA	0.000866387505916943	NA	NA	NA	NA	NA	NA	NA	NA	NA	NA	NA	NA	NA	NA
A0A4D5RA52	NA	NA	NA	NA	NA	NA	NA	NA	0.00694875104532779	NA	NA	NA	NA	NA	NA	NA	NA	NA	NA	NA	NA	NA	NA	NA	NA	NA	NA	NA	NA	NA	NA	NA	NA
A0A4D5RAB6	NA	0.00863819537752122	NA	NA	NA	NA	NA	0.0137697467174143	NA	NA	NA	NA	NA	0.020872567	NA	0.00911069912934515	NA	NA	NA	0.0099880802855964	NA	NA	NA	NA	NA	NA	NA	NA	NA	NA	NA	NA	NA
A0A4D5RAB7	NA	NA	NA	NA	NA	NA	NA	NA	NA	NA	NA	NA	NA	NA	NA	0.00441944856587514	NA	NA	NA	NA	NA	NA	NA	NA	NA	NA	NA	NA	NA	NA	NA	NA	NA
A0A4D5RAJ5	NA	NA	NA	NA	NA	NA	NA	NA	NA	NA	NA	NA	NA	NA	NA	NA	NA	NA	NA	NA	NA	NA	NA	NA	NA	NA	0.0108998428792052	NA	NA	NA	NA	NA	NA
A0A4E0VZZ8	NA	NA	NA	NA	NA	NA	NA	NA	0.0305926256371144	NA	NA	0.0195140423851635	0.0081393041783637	0.002624672	NA	NA	NA	NA	NA	NA	NA	NA	NA	NA	NA	NA	NA	NA	NA	NA	NA	NA	NA
A0A4E0W136	NA	NA	NA	NA	NA	NA	NA	NA	NA	NA	NA	NA	NA	NA	0.00862978842328713	NA	NA	NA	NA	NA	NA	NA	NA	NA	0.00393509437053355	NA	NA	NA	NA	NA	NA	NA	NA
A0A4P8J2E7	NA	NA	NA	NA	NA	NA	NA	NA	0.0538877264523245	NA	NA	NA	NA	NA	NA	NA	NA	NA	NA	NA	NA	NA	NA	NA	NA	NA	NA	NA	NA	NA	NA	NA	NA
A0A4P8J3Z7	NA	NA	NA	NA	NA	NA	NA	NA	0.0186851863564637	NA	NA	NA	NA	NA	NA	NA	NA	NA	NA	NA	NA	NA	NA	NA	NA	NA	NA	NA	NA	NA	NA	NA	NA
A0JLU4	NA	NA	NA	NA	NA	NA	NA	NA	NA	NA	NA	NA	0.0028555017135781	NA	NA	NA	NA	NA	NA	NA	NA	NA	NA	NA	NA	NA	0.00247180204943607	NA	NA	NA	NA	NA	NA
A0M8Q6	NA	NA	NA	0.00591704756114541	NA	NA	NA	NA	NA	NA	NA	NA	NA	NA	NA	NA	NA	NA	NA	NA	NA	NA	NA	NA	NA	NA	NA	NA	NA	NA	NA	NA	0.00145905792786878
A0MZ66	NA	NA	NA	NA	NA	NA	NA	NA	NA	NA	NA	NA	NA	NA	NA	NA	NA	NA	NA	0.000928042577841929	NA	NA	NA	NA	NA	NA	NA	NA	NA	NA	NA	NA	NA
A0N071	NA	NA	NA	NA	NA	0.0139561063471471	NA	NA	NA	NA	NA	NA	NA	0.005102041	NA	NA	NA	NA	NA	NA	NA	NA	NA	NA	NA	NA	NA	NA	NA	NA	NA	NA	NA
A0N5G3	NA	NA	NA	NA	NA	NA	NA	NA	0.0145482019178717	NA	NA	NA	NA	NA	NA	NA	NA	NA	NA	NA	NA	NA	NA	NA	NA	NA	NA	NA	NA	NA	NA	NA	NA
A0PJG0	0.00775723969358902	NA	NA	0.00380458506594692	NA	0.0114440686211596	NA	NA	NA	0.00722823531690263	NA	0.0027038632841705	NA	NA	NA	NA	0.00505330040761394	0.00491608533491967	NA	NA	NA	NA	NA	NA	NA	0.00622938228631487	NA	NA	NA	NA	NA	NA	0.00462823359647281
A1A5C4	NA	NA	NA	NA	NA	NA	NA	NA	NA	NA	NA	NA	NA	NA	NA	NA	NA	NA	NA	0.00394583974318903	NA	NA	NA	NA	NA	NA	NA	NA	NA	NA	NA	NA	NA
A1E286	NA	NA	NA	NA	NA	NA	NA	NA	NA	NA	NA	NA	NA	NA	NA	NA	NA	NA	NA	NA	NA	0.00376157096305854	NA	NA	NA	NA	NA	NA	NA	NA	NA	NA	NA
A1JUI8	NA	NA	NA	NA	NA	NA	NA	NA	NA	NA	NA	NA	NA	NA	NA	NA	NA	NA	0.000631046777513121	NA	NA	NA	NA	NA	NA	NA	NA	NA	NA	NA	NA	NA	NA
A1L2Z2	NA	NA	NA	NA	NA	NA	NA	NA	NA	NA	NA	0.00179511408259954	0.00342281957199988	NA	NA	NA	NA	NA	NA	NA	NA	0.000934165553451847	NA	NA	NA	NA	NA	NA	NA	NA	NA	NA	NA
A1L306	NA	NA	NA	NA	NA	NA	NA	NA	NA	NA	NA	NA	NA	NA	NA	NA	NA	NA	NA	NA	NA	NA	NA	NA	0.00175464972585858	NA	NA	NA	NA	NA	NA	NA	NA
A1X283	NA	NA	NA	NA	NA	NA	NA	NA	NA	NA	NA	NA	NA	0.001259446	NA	NA	NA	NA	NA	NA	NA	NA	NA	NA	NA	NA	NA	NA	NA	NA	NA	NA	NA
A1Z1N9	NA	NA	NA	NA	NA	NA	NA	NA	NA	NA	NA	0.00426277372278077	NA	NA	NA	NA	NA	NA	NA	NA	NA	NA	NA	NA	NA	NA	NA	NA	NA	NA	NA	NA	NA
A2A274	NA	0.000759386304744163	0.00243405948738146	NA	0.00253036229850726	NA	NA	0.000348820358908938	NA	NA	NA	NA	0.00187320319485223	NA	0.000550650618436658	0.00257572935577556	NA	NA	NA	0.000508220588022047	NA	NA	0.00234252685580467	0.00120915856112623	NA	NA	NA	NA	NA	NA	0.000245053428249292	0.0013356950479281	0.00165791901394334
A2A299	NA	0.00972312037213154	NA	NA	0.00925673106973924	NA	NA	NA	NA	NA	0.00802495781990571	0.0106298925948431	0.00506711589733573	0.014705882	0.0105757215723012	NA	NA	NA	0.00514735822322376	NA	NA	NA	NA	NA	NA	0.00979600938327365	0.00877247413314988	0.00483909868453145	NA	NA	NA	0.00816387923718887	NA
A2A2D0	NA	NA	0.00602432076075969	NA	0.0203648070315652	NA	0.0123949557354454	0.0406941286577982	0.0103548965245773	NA	0.0284885993602651	0.0127558706801121	NA	0.01127451	NA	NA	NA	NA	0.0061768296578563	0.00976082586404882	NA	NA	0.0419909490462986	0.0111470221853145	NA	NA	0.0210539372037259	NA	NA	NA	NA	0.00734749064729746	NA
A2A2G5	NA	NA	NA	NA	NA	NA	NA	NA	NA	NA	NA	NA	NA	0.006369427	NA	NA	NA	NA	NA	NA	NA	NA	NA	NA	NA	NA	NA	NA	NA	NA	NA	NA	NA
A2A2M0	NA	NA	NA	NA	NA	NA	NA	NA	NA	NA	NA	NA	0.00634166590667732	NA	NA	NA	NA	NA	NA	NA	NA	NA	NA	NA	NA	NA	NA	NA	NA	NA	NA	NA	NA
A2A2S5	NA	0.0044016888351192	NA	0.00486748437204628	0.0116118353533722	NA	0.00295946998729532	0.0329056076813798	0.0112921370973306	NA	0.00682121357393789	0.0106033501793973	0.016739227534756	0.014518998	0.00785587223365739	0.00360507793326744	0.00964488046059667	NA	0.00293700495372842	0.00414317183107661	NA	0.00316986375437163	0.00750859558205436	NA	0.00347984822167449	NA	0.00354677333281607	0.00699403794429306	NA	NA	NA	0.00345295784831314	NA
A2A369	0.000653582721436229	NA	NA	NA	NA	NA	NA	NA	NA	NA	NA	NA	NA	NA	NA	NA	NA	0.000633253936766937	NA	NA	NA	NA	NA	NA	NA	NA	NA	NA	0.00213063268710374	NA	NA	NA	NA
A2A3R5	NA	0.0159606350231524	0.0211403916181833	0.0116639050324762	0.0228518717684777	0.00792944444660791	NA	0.0247284021253608	0.0121123789380102	NA	0.0150191865717934	0.0182366040704148	0.017544306864919	0.028669725	0.00989654643615302	0.0176615771209326	0.0116191143897595	NA	0.0210734721760823	0.0180263282098445	NA	0.0167372666505793	0.0144234965581571	0.0144877199366474	0.0045127229380898	NA	0.0165257082279163	0.0116604518900663	NA	NA	0.0110105541596891	0.0156611654365337	0.0180909803715932
A2A3R7	NA	0.0276093869028197	0.0307615496200683	0.011176840788047	0.0380441455228067	0.0321467582291763	NA	0.0487265481806285	NA	NA	NA	0.0436876882047527	0.0158218097028434	0.04029304	0.00592705195508665	0.0192318866899984	0.0222678410482357	NA	0.0223089886864054	0.0324169075869798	NA	0.0206679740358057	0.0186772923697138	NA	NA	NA	0.0229433931983979	NA	NA	NA	NA	NA	0.0441886131205303
A2IDA3	NA	NA	NA	NA	NA	NA	NA	NA	NA	NA	NA	NA	NA	0.002702703	NA	NA	NA	NA	NA	NA	NA	NA	NA	NA	NA	NA	NA	NA	NA	NA	NA	NA	NA
A2IDB1	NA	NA	NA	NA	NA	NA	0.0903061054704904	NA	NA	NA	NA	NA	NA	0.035714286	0.0308206734026213	NA	NA	NA	NA	0.0632129702924128	NA	NA	NA	NA	NA	NA	NA	NA	NA	NA	NA	NA	NA
A2IPI2	NA	NA	NA	NA	NA	NA	NA	NA	0.0114804284110968	NA	NA	NA	NA	NA	NA	NA	NA	NA	NA	NA	NA	NA	NA	NA	NA	NA	NA	NA	NA	NA	NA	NA	NA
A2J1N9	NA	NA	NA	NA	NA	NA	NA	NA	NA	NA	NA	NA	0.00358920670631179	NA	NA	NA	NA	NA	NA	NA	NA	NA	NA	NA	NA	NA	NA	NA	NA	NA	NA	NA	NA
A2KBB9	NA	NA	NA	NA	NA	NA	NA	NA	0.0366321526798671	NA	NA	NA	NA	NA	NA	NA	NA	NA	NA	NA	NA	NA	NA	NA	NA	NA	NA	NA	NA	NA	NA	NA	NA
A2MYD3	NA	NA	NA	NA	NA	NA	NA	NA	NA	NA	NA	0.019166017973619	0.00522066458200577	0.02020202	NA	NA	0.0153513144931768	NA	NA	NA	NA	NA	NA	NA	NA	NA	NA	NA	NA	NA	NA	NA	0.0265578029756663
A2N011	NA	NA	0.0201601279494896	NA	NA	NA	NA	NA	NA	NA	NA	NA	NA	NA	NA	NA	NA	NA	NA	NA	NA	NA	NA	NA	0.0232387460425447	NA	NA	NA	NA	0.0146520130695971	NA	0.00421509584661236	NA
A2N2F4	NA	NA	0.00948272676307441	NA	NA	NA	NA	NA	NA	NA	NA	NA	NA	NA	NA	NA	NA	NA	NA	NA	NA	NA	NA	NA	NA	NA	NA	NA	NA	NA	NA	NA	NA
A2NUT2	0.00506222525791755	0.00674798749059888	0.011529464720144	0.0113712203890435	0.0241911144368606	0.0148662872132181	NA	NA	0.0063780160773314	NA	0.00762620166375895	0.00269378627399269	NA	0.00621118	NA	0.00913096530724991	NA	NA	0.0078265416919285	NA	NA	0.00300391639238512	0.0126680765283353	NA	0.0103876712672575	NA	NA	0.0104235982384518	0	0.00481574938251091	NA	NA	0.00576373198477163
A2NZ55	NA	0.0300532795273476	NA	0.0728496009583662	0.0116333335364184	0.0241764875279075	NA	0.0883510022537169	0.0961941107987066	NA	NA	0.0359851757405559	0.0208826583280231	0.01010101	NA	NA	NA	NA	NA	0.0446960392654756	NA	0.0227974018278785	0.030902429416024	NA	NA	NA	NA	0.0199429510775133	NA	0.0206756188871796	NA	NA	0.0187466840167241
A2RRP8	NA	NA	NA	NA	NA	0.0130859124247877	NA	NA	NA	NA	NA	NA	NA	NA	NA	NA	NA	NA	NA	NA	NA	NA	NA	NA	NA	NA	NA	NA	NA	NA	NA	NA	NA
A4D0W6	NA	NA	NA	NA	NA	NA	NA	NA	NA	NA	NA	NA	0.0114854620804127	NA	0.00599290910671542	NA	NA	NA	NA	NA	NA	NA	NA	NA	NA	NA	NA	NA	NA	NA	NA	NA	NA
A4D111	NA	NA	NA	0.0111542613343096	0.0109554368794061	NA	NA	NA	NA	NA	NA	NA	0.0102175866177166	0.033333333	NA	NA	NA	NA	0.0155564599179366	0.0112196184486462	NA	NA	NA	NA	NA	NA	0.0181227264062589	NA	NA	NA	NA	NA	NA
A4F255	NA	NA	NA	NA	NA	NA	NA	NA	NA	NA	NA	NA	NA	NA	NA	NA	NA	NA	NA	NA	NA	NA	NA	NA	NA	NA	NA	NA	0.00431594966537445	NA	NA	NA	NA
A4QPB0	NA	0.00100177598424492	0.00033733045203166	NA	0.000840972777307969	NA	NA	0.0014961669878155	0.000821410701387624	NA	0.000539226777136408	NA	0.00151512725699459	NA	0.000710622085162684	NA	NA	NA	0.00144112476062473	0.00228338413368105	NA	0.000371697038784659	NA	NA	NA	NA	NA	NA	NA	NA	NA	0.000978266845955766	0.000609607189007563
A4UCT1	NA	NA	NA	NA	NA	NA	NA	NA	NA	0.0160192465110078	NA	NA	NA	NA	NA	NA	NA	NA	NA	NA	NA	NA	NA	NA	NA	NA	NA	NA	NA	NA	NA	NA	NA
A4UCT3	NA	NA	NA	0.0329970034363783	NA	NA	NA	NA	NA	NA	NA	NA	NA	NA	NA	NA	NA	NA	NA	NA	NA	NA	NA	NA	NA	NA	NA	NA	NA	NA	NA	NA	NA
A5A3E0	NA	NA	NA	NA	NA	NA	NA	NA	0.00132796483055339	NA	NA	NA	NA	NA	0.00145911707554452	0.00128135587458505	NA	NA	NA	NA	NA	NA	NA	NA	0.00192848547099767	NA	NA	NA	NA	0.00111427465468473	NA	NA	NA
A5D6X0	NA	NA	NA	NA	0.00321151923159929	NA	NA	NA	NA	NA	NA	NA	NA	NA	NA	NA	NA	NA	NA	NA	NA	NA	NA	NA	NA	NA	NA	NA	NA	NA	NA	0.00283236652087644	NA
A5D8X1	NA	NA	NA	NA	NA	NA	NA	NA	NA	NA	NA	NA	0.0061897700948718	NA	NA	NA	NA	NA	NA	NA	NA	NA	NA	NA	NA	NA	NA	NA	NA	NA	NA	NA	NA
A5PKT9	NA	NA	NA	NA	0.00458274527441706	NA	0.00177668035647187	NA	NA	NA	NA	0.00505627592996611	NA	NA	NA	NA	NA	NA	NA	NA	NA	NA	NA	NA	NA	NA	NA	NA	NA	NA	NA	NA	NA
A5YKK6	NA	NA	NA	NA	NA	NA	NA	NA	NA	NA	NA	NA	NA	0.000814332	NA	NA	NA	NA	NA	NA	NA	NA	NA	NA	NA	NA	NA	NA	NA	NA	NA	NA	NA
A6MUU8	NA	NA	NA	NA	0.0325581564812154	NA	NA	0.023563440819092	NA	NA	NA	NA	0.0297037813493802	NA	NA	NA	NA	NA	NA	NA	NA	NA	NA	NA	NA	NA	NA	NA	NA	NA	NA	NA	NA
A6NEL0	NA	NA	NA	NA	NA	NA	NA	0.00589085997699307	NA	NA	0.009408570926648	NA	0.00445556740914535	0.002873563	NA	NA	NA	NA	NA	NA	NA	NA	NA	NA	NA	NA	NA	NA	NA	NA	NA	NA	0.00266655401604145
A6NGP5	NA	NA	NA	NA	NA	NA	NA	NA	NA	NA	NA	0.0203042885926109	NA	NA	NA	NA	NA	NA	NA	NA	NA	NA	NA	NA	NA	NA	NA	NA	NA	NA	NA	NA	NA
A6NGQ3	NA	NA	NA	NA	NA	NA	NA	NA	NA	NA	NA	NA	0.000139575241654035	NA	NA	NA	NA	NA	NA	NA	NA	NA	NA	NA	NA	NA	NA	NA	NA	NA	NA	NA	NA
A6NHL2	NA	NA	NA	0.000563486541497814	NA	NA	NA	NA	NA	NA	NA	NA	NA	NA	NA	NA	NA	NA	NA	0.00153217083282595	NA	NA	NA	NA	NA	NA	NA	NA	NA	NA	NA	NA	0.00192789623706705
A6NHR9	NA	NA	NA	NA	NA	NA	NA	NA	NA	NA	NA	NA	NA	NA	NA	NA	NA	NA	NA	NA	NA	NA	0.000437798770133053	NA	NA	NA	NA	NA	NA	NA	NA	NA	NA
A6NIF9	NA	NA	0.00568963667232536	NA	NA	NA	NA	NA	NA	NA	NA	NA	NA	NA	NA	NA	NA	NA	NA	NA	NA	NA	NA	NA	NA	NA	NA	NA	NA	NA	NA	NA	NA
A6NIW5	0.0119855626950684	0.0124577479148086	0.0198928093814519	0.0152688521291463	0.0167778244737858	0.0175990613254287	NA	0.0207681701922765	NA	0.00782116132536631	0.00300935938710106	0.0146161015047225	NA	NA	NA	0.0147986539729649	0.00372495176528844	0.00653218250971211	0.0128929066076833	0.0251476843242382	NA	0.0136218663114711	0.0104352504859334	0.0174503977017427	NA	0.0226940871056332	NA	NA	NA	NA	NA	NA	NA
A6NJA2	NA	NA	NA	NA	NA	NA	NA	NA	NA	NA	NA	NA	NA	NA	NA	NA	NA	NA	NA	NA	NA	NA	NA	0.00140996536410307	NA	NA	NA	NA	NA	NA	NA	NA	NA
A6NJD9	NA	NA	NA	NA	NA	NA	NA	NA	NA	NA	NA	NA	NA	NA	NA	NA	NA	NA	NA	0.00678666824694946	NA	NA	NA	NA	NA	NA	NA	NA	NA	NA	NA	NA	NA
A6NJH9	NA	NA	NA	NA	NA	NA	NA	NA	NA	NA	NA	NA	0.0081393041783637	NA	NA	NA	NA	NA	NA	NA	NA	NA	NA	NA	NA	NA	NA	NA	NA	NA	NA	NA	NA
A6NKB8	NA	NA	NA	NA	NA	NA	NA	NA	0.00378566082054635	NA	NA	0.00718946427106495	NA	0.007885305	NA	NA	NA	NA	0.0033872931752465	NA	NA	NA	NA	NA	NA	NA	NA	NA	NA	NA	NA	NA	0.00498903684548428
A6NL76	NA	0.0121040135383408	0.0105280670115144	NA	NA	0.0188462383028741	NA	NA	NA	NA	NA	NA	NA	NA	NA	0.00597147552232431	0.00398892440591935	NA	0.00772497558873365	NA	0.0121476404023192	NA	NA	0.0167863615709479	NA	NA	NA	NA	NA	NA	NA	NA	NA
A6NL93	NA	NA	NA	NA	NA	NA	NA	NA	NA	NA	NA	NA	NA	NA	NA	NA	0.00562881582075822	NA	NA	NA	NA	NA	NA	NA	NA	NA	NA	NA	NA	NA	NA	NA	NA
A6NLM8	NA	0.0135239762831856	0.0279309411503579	NA	0.0138289949295138	0.0187367776346723	NA	0.0331316255034739	0.00266717026359318	0.0193395991843874	0.00744132412208106	0.0098568089647686	0.0375887849904415	0.059090909	0.0294197329670088	0.0190920185606246	NA	NA	0.0190920185606246	0.020113217669464	NA	0.0128235382460638	0.00927072882480719	0.00861360788001631	0.0268301886216996	NA	0.00813447557511366	0.0179486559697619	NA	NA	NA	NA	0.0323380303928294
A6NM71	NA	NA	NA	NA	0.00948931159288884	NA	NA	0.0183139644733946	NA	NA	NA	0.010896974566017	NA	0.01758794	NA	NA	NA	NA	0.00527668899014813	0.00555892997358587	NA	NA	NA	NA	NA	NA	NA	NA	NA	NA	NA	NA	NA
A6NNA4	NA	0.00610670173991402	0.0364386816099156	NA	NA	0.00775546613720253	NA	0.00485995991380114	0.0158610305303561	NA	NA	NA	NA	NA	NA	NA	NA	0.00531834827354429	NA	NA	NA	NA	NA	NA	NA	NA	NA	NA	NA	NA	NA	NA	NA
A6NNB3	NA	NA	NA	NA	NA	NA	NA	NA	NA	NA	NA	NA	NA	NA	NA	NA	NA	NA	NA	NA	NA	NA	NA	0.0323010297869354	NA	NA	NA	NA	NA	NA	NA	NA	NA
A6NNE9	NA	NA	NA	NA	NA	NA	NA	NA	NA	NA	NA	NA	NA	NA	NA	NA	NA	NA	NA	NA	NA	NA	NA	NA	NA	NA	NA	0.00324729007558412	NA	NA	NA	NA	NA
A6NP52	NA	0.0139684257935884	NA	0.0286504931730678	0.0265968035137081	0.0337108772115091	NA	NA	0.0247934138914624	NA	NA	0.0305422251750504	0.043677109625619	0.056338028	NA	0.0221843884444272	NA	NA	0.0147895919462645	NA	NA	NA	0.0143631010967219	0.0266900527727964	NA	NA	0.025205417451438	0.0139038885246076	NA	NA	NA	NA	NA
A6PVH9	NA	NA	NA	NA	0.0126874498130194	0.00323005707367211	NA	0.0100079129235214	NA	NA	NA	NA	0.00920697011767522	0.005060729	NA	0.00722714060371672	NA	NA	NA	NA	NA	NA	0.00550488661224183	NA	NA	NA	NA	0.00599499599950412	NA	NA	NA	NA	NA
A6PVK5	NA	NA	NA	0.00728458133058564	NA	NA	NA	NA	NA	NA	NA	0.0058608049494506	0.0055875217299848	NA	NA	0.00567600514908315	NA	NA	NA	0.00597960486440956	NA	NA	NA	NA	NA	NA	NA	NA	NA	NA	NA	NA	NA
A6PVX1	NA	NA	NA	NA	0.00960189733862271	NA	NA	0.00926562460653204	NA	NA	NA	NA	NA	0.006779661	0.0146267600029028	NA	NA	NA	0.00355952943591122	0.00749984393299813	NA	0.00765065355215948	0.00345688247049057	NA	NA	NA	NA	0.0100390793316293	NA	0.0189234479369716	0.0130185805104221	0.0141138248819847	0.00629126010703422
A6PVX3	NA	NA	NA	NA	NA	NA	NA	NA	NA	NA	NA	NA	0.0140638310766812	NA	NA	NA	NA	NA	NA	NA	NA	NA	NA	NA	NA	NA	NA	NA	NA	NA	NA	NA	0.00631265888465278
A6QRI9	NA	0.00713495171846588	NA	NA	NA	NA	NA	NA	NA	NA	NA	NA	NA	NA	NA	NA	NA	NA	NA	NA	NA	NA	NA	NA	NA	NA	NA	NA	NA	NA	NA	NA	NA
A7BI36	NA	NA	NA	NA	NA	0.00210009721029375	NA	NA	NA	NA	NA	NA	NA	NA	NA	NA	NA	NA	NA	NA	NA	NA	NA	NA	NA	NA	NA	NA	NA	NA	NA	NA	0.00416983391907989
A7E2S2	NA	0.00330586045048077	0.00170689120652451	NA	NA	NA	NA	NA	NA	NA	NA	NA	NA	NA	NA	NA	NA	NA	NA	NA	NA	NA	NA	NA	NA	NA	NA	NA	NA	NA	NA	NA	0.00927960868107449
A7XZE4	NA	NA	NA	NA	NA	NA	NA	NA	NA	NA	NA	NA	NA	NA	NA	NA	NA	NA	NA	0.00201713963589478	NA	NA	NA	NA	0.00751786596924294	NA	NA	NA	NA	NA	NA	NA	NA
A8CTZ0	NA	NA	NA	NA	NA	NA	NA	NA	NA	NA	NA	NA	NA	NA	NA	NA	NA	NA	NA	NA	NA	NA	NA	NA	NA	NA	NA	NA	NA	NA	0.000675190209749917	NA	NA
A8JZY9	NA	NA	0.00610702269557959	NA	NA	NA	NA	NA	NA	NA	NA	NA	NA	NA	NA	NA	NA	NA	NA	NA	NA	NA	NA	NA	NA	NA	NA	NA	NA	NA	NA	NA	NA
A8K008	NA	0.00133660149821725	NA	0.00274148946099299	0.00636244246023224	0.00215046943026811	NA	0.00736754449203987	NA	NA	NA	NA	NA	NA	NA	0.00141517670247941	NA	NA	0.00849105916481542	NA	NA	NA	0.0013743669278564	0.00127695006763008	0.00132584052475435	NA	NA	NA	NA	NA	NA	0.00224451673990727	NA
A8K088	NA	NA	NA	NA	NA	NA	NA	NA	NA	NA	NA	NA	NA	NA	NA	NA	NA	NA	0.0018869019199522	NA	NA	NA	NA	NA	NA	NA	NA	NA	NA	NA	NA	NA	NA
A8K2R3	NA	NA	NA	NA	0.0007565596691837	NA	NA	NA	NA	NA	NA	NA	NA	NA	NA	NA	NA	NA	NA	NA	NA	NA	NA	NA	NA	NA	NA	NA	NA	NA	NA	NA	NA
A8K3B0	NA	NA	NA	NA	0.00949987987269192	NA	NA	NA	NA	NA	NA	NA	NA	NA	NA	NA	NA	NA	NA	NA	NA	NA	NA	NA	NA	NA	NA	NA	NA	NA	NA	NA	NA
A8K3B4	NA	NA	NA	NA	NA	NA	NA	NA	NA	NA	NA	NA	NA	NA	NA	0.00352808010802274	NA	NA	NA	NA	NA	NA	NA	NA	NA	NA	NA	NA	NA	NA	NA	NA	NA
A8K3K1	NA	NA	NA	0.00662561319546129	NA	NA	NA	NA	NA	NA	NA	0.00565318753026637	NA	NA	NA	0.00797413512030985	NA	NA	NA	NA	NA	NA	NA	NA	NA	NA	NA	NA	NA	NA	NA	0.00330502175030228	NA
A8K3Q9	NA	0.00857074986703805	NA	NA	0.00995669903102003	NA	NA	NA	NA	NA	NA	NA	0.0239280460870007	NA	NA	NA	NA	NA	NA	NA	NA	NA	NA	NA	NA	NA	NA	0.0137107791125844	NA	NA	NA	NA	NA
A8K486	NA	NA	NA	NA	NA	NA	NA	NA	NA	NA	0.00992176549610808	NA	NA	NA	0.0165258992029152	NA	0.0138405506921912	NA	NA	NA	NA	NA	NA	NA	NA	NA	NA	NA	NA	NA	NA	NA	NA
A8K4G9	NA	NA	NA	NA	NA	NA	NA	NA	NA	NA	NA	NA	0.00106566161130383	NA	NA	NA	NA	NA	NA	NA	NA	NA	NA	NA	NA	NA	NA	NA	NA	NA	NA	NA	NA
A8K4Y7	0.00391835687819193	NA	NA	0.0277092513534502	NA	NA	NA	NA	0.0146224192918328	NA	0.0125389956727388	0.0238852561871269	NA	0.029226543	NA	NA	0.0201338397242084	NA	NA	0.0252543367738849	NA	NA	0.0561986692961932	NA	0.0161860180656348	NA	NA	0.0453246718132773	NA	NA	NA	NA	NA
A8K6V3	NA	NA	NA	NA	NA	NA	NA	NA	NA	NA	0.0014260375098381	NA	0.00125059524025941	NA	NA	NA	NA	NA	NA	NA	NA	NA	NA	NA	NA	NA	NA	NA	NA	NA	NA	NA	NA
A8K781	NA	NA	NA	NA	0.00484198207161299	NA	NA	NA	NA	NA	NA	NA	NA	NA	NA	NA	NA	NA	NA	NA	NA	NA	NA	NA	NA	NA	NA	NA	NA	NA	NA	NA	NA
A8K7B7	NA	NA	0.00385012926278965	0.00191182777526123	0.000776468786304024	NA	NA	0.00114175417612377	0.0016544475180554	NA	NA	0.00339676995366623	0.000485757523989989	0.002832975	0.00202767558368305	NA	0.00190448615214452	NA	0.0011513824703095	0.0020793737534978	NA	NA	0.00191687978630754	NA	NA	NA	NA	0.00185559390582974	NA	NA	NA	0.00286963387687755	0.0017442871158207
A8K7F6	NA	NA	NA	NA	NA	0.00215046943026811	NA	NA	NA	NA	NA	NA	NA	NA	NA	NA	NA	NA	NA	NA	NA	NA	NA	NA	NA	NA	NA	NA	NA	NA	NA	NA	NA
A8K7N0	NA	NA	NA	NA	NA	NA	NA	0.0511982410201132	0.020187298230017	NA	NA	NA	NA	NA	NA	NA	0.0319138339879022	NA	NA	NA	NA	NA	NA	0.0173852639239768	NA	NA	NA	NA	NA	NA	NA	0.0273752087502038	NA
A8K7Q2	0.00191206712227554	0.0028555020445178	0.00855624551865066	NA	0.00509452269795539	0.0032036921785825	NA	0.00879899738018075	NA	NA	NA	0.00562290445578108	0.00714979772812794	0.005786726	0.00843576596888991	0.00275001428551241	0.00222841614606734	0.00329993367301669	0.00229418489193197	0.00922794968903228	0.00341486340378266	NA	0.00399389463464579	0.00911428891686285	0.00176303541196218	NA	0.00408363798863446	NA	0.00155829771705058	NA	0.00316755213376772	0.00614565297396084	0.000777512428482925
A8K9M5	NA	NA	NA	0.000974226129739425	NA	NA	NA	NA	NA	NA	NA	NA	NA	NA	NA	NA	NA	NA	NA	NA	NA	NA	NA	NA	NA	NA	NA	NA	NA	NA	NA	NA	NA
A8K9P0	NA	NA	NA	NA	NA	NA	NA	NA	0.00376322186355094	NA	NA	NA	NA	NA	NA	NA	NA	NA	NA	NA	NA	NA	NA	NA	NA	NA	NA	NA	NA	NA	NA	NA	NA
A8KA83	NA	NA	NA	NA	NA	NA	NA	NA	NA	NA	NA	NA	NA	0.00952381	NA	0.00500029087541911	NA	NA	NA	NA	NA	NA	NA	NA	NA	NA	NA	NA	NA	NA	NA	NA	NA
A8KAM9	NA	0.00123557902095294	NA	NA	0.002352623905625	NA	NA	NA	NA	NA	NA	NA	NA	NA	NA	NA	NA	NA	NA	NA	NA	NA	NA	NA	NA	NA	NA	NA	NA	NA	NA	NA	NA
A8MTM1	NA	0.00111684473338191	0.00384434904756392	0.00152716643899384	0.00685220428650724	0.00119793447639157	NA	NA	0.00132157130330719	NA	NA	NA	NA	0.001689189	0.00890837741061478	NA	NA	NA	NA	0.00622875594285632	NA	NA	0.00321552293682923	0.00195616888837033	NA	NA	0.00291098580660803	NA	NA	NA	0.00162182467484874	0.00343839032080982	0.00104500086055837
A8MU27	NA	NA	0.0069669013998235	NA	0.00963455675061133	NA	NA	0.00619809318783792	NA	NA	NA	0.00553188283673469	0.00703191553834059	0.006802721	NA	NA	NA	NA	NA	0.00752535352722341	NA	NA	0.00346864053597666	0.00322277892258961	NA	NA	NA	NA	NA	NA	NA	0.00424854936495683	NA
A8MU39	NA	NA	NA	NA	NA	NA	NA	0.00157089611534745	NA	NA	NA	NA	0.00178222696365814	NA	NA	NA	NA	NA	NA	NA	NA	NA	NA	NA	NA	NA	NA	NA	NA	NA	NA	NA	NA
A8MUD9	0.00783671375638386	0.0145028743884812	0.0141415402937678	0.00977973607095081	0.015558110154674	0.00580681269471137	NA	0.00828622467385397	NA	NA	NA	NA	0.0135729216337689	NA	0.00756316599119279	0.00364604501434394	NA	NA	0.00710978788297679	0.0121468435247478	NA	0.01017251855891	0.00878416416642223	0.00284704619381143	0.0047296804311148	NA	0.0112578823946375	0.00984803114327831	NA	NA	0.00490446067005889	0.00971787568789277	NA
A8MUF7	NA	NA	0.0156955476751484	NA	NA	NA	NA	NA	0.0118029952391938	NA	NA	0.0083084211626739	NA	NA	0.0427357392169402	NA	NA	NA	NA	NA	NA	NA	NA	NA	NA	NA	NA	NA	NA	NA	NA	NA	NA
A8MUS3	NA	0.0118229314030863	0.0109242339916677	0.00611653601782312	0.0141352512715961	0.00411249520243901	NA	0.00918425341631086	NA	NA	0.00421930739063825	0.012486339390454	0.0174628922810024	0.009219589	0.00620914787268483	0.0171401714159453	0.00565782943700891	NA	0.00996836272821376	0.0214375605327888	NA	0.00533212442187877	0.0139069758569574	NA	0.00633874740564112	NA	0.0246402827269917	0.00848089394024639	NA	NA	0.00439917623162009	0.00811969284688885	0.00850365058704565
A8MVQ3	NA	NA	NA	NA	NA	0.00238869491850832	NA	NA	NA	NA	NA	NA	NA	NA	NA	NA	NA	NA	NA	NA	NA	NA	NA	NA	NA	NA	NA	NA	NA	NA	NA	NA	NA
A8MVZ9	NA	NA	0.00152400945718196	0.0030270605594059	NA	NA	NA	0.00244049883395779	NA	NA	NA	0.00322693102228332	NA	0.006696429	NA	NA	NA	NA	NA	NA	NA	NA	NA	NA	NA	NA	NA	NA	NA	NA	NA	NA	NA
A8MW50	0.00700445457680388	0.00410949504060736	0.00565820188739648	NA	NA	0.00440786803288021	NA	0.00964813726121395	0.00486279676879044	0.00293833698668233	NA	0.00748790706022712	0.00726566525299161	0.007519951	NA	0.00580144228970333	0.0111954341322834	0.00654421231611859	0.00894388958409037	NA	NA	0.00623464876569654	0.00422560806757575	NA	0.00634108190037644	NA	0.00700343928920091	0.0109080233141054	NA	0.0077105211024528	NA	0.00920127805385105	NA
A8MX49	NA	NA	NA	NA	NA	NA	NA	NA	NA	NA	NA	NA	NA	0.008691712	NA	NA	NA	NA	NA	NA	NA	NA	NA	NA	NA	NA	NA	NA	NA	NA	NA	NA	NA
A8MX94	NA	NA	0.0330874226092568	NA	0.0493075184521276	NA	NA	0.0261654893777912	NA	NA	NA	0.0132055965633231	0.0463835974595656	NA	0.00829787381584487	NA	NA	NA	0.0107698564623942	0.0127641580053677	NA	NA	NA	NA	NA	NA	NA	NA	NA	NA	NA	0.0181489309072419	0.0190350951824927
A8MXH2	NA	NA	NA	NA	0.0030262386767348	NA	NA	NA	NA	NA	NA	NA	NA	0.006410256	NA	NA	NA	NA	NA	0.00709119815438632	NA	NA	NA	NA	NA	NA	0.00860377267309729	NA	NA	NA	NA	NA	0.0118969343730628
A8MXK4	NA	NA	NA	NA	NA	NA	NA	NA	NA	NA	NA	0.0480363474590812	NA	NA	NA	NA	NA	NA	NA	NA	NA	0.0142844482950172	NA	NA	NA	NA	NA	NA	NA	NA	NA	NA	NA
A8MXP8	NA	NA	NA	NA	NA	0.00565832725865822	NA	0.00646184229938151	NA	NA	NA	NA	0.00733114651462314	0.007092199	NA	NA	NA	NA	NA	NA	NA	NA	NA	NA	NA	NA	NA	NA	NA	NA	NA	NA	NA
A8MYV2	NA	NA	0.00125506661179691	NA	NA	NA	NA	NA	NA	NA	NA	NA	NA	NA	NA	NA	NA	NA	NA	NA	NA	NA	NA	NA	NA	NA	NA	NA	NA	NA	NA	NA	NA
A8MZG1	NA	0.0293658909033822	0.0358542193053519	0.0216402664446871	0.0749274665844126	0.0561588947910497	NA	0.0274628281779119	0.0291458278081354	0.0541268753975159	0.0210441704944895	0.0173018459039046	NA	0.008865248	NA	0.0127534007493653	0.0305393174641793	0.0534646220118277	0.0288580607796259	NA	NA	0.0488203935848907	0.0334502359826888	0.015119631185852	0.0269698825043064	0.0106297119693589	NA	0.0490087418977937	0.0455378638990539	0.0305185330939035	NA	0.031743592558281	0.0557763713474788
A8WDG6	NA	NA	NA	NA	NA	NA	NA	NA	NA	NA	NA	NA	NA	NA	NA	NA	NA	NA	NA	NA	NA	NA	NA	NA	NA	NA	NA	NA	0	NA	NA	NA	NA
A9X7H1	NA	NA	NA	NA	NA	NA	NA	NA	NA	NA	NA	NA	NA	NA	NA	NA	NA	NA	NA	NA	NA	NA	NA	NA	NA	NA	NA	NA	NA	NA	0.00882869226519557	NA	NA
B0AZS6	NA	0.00992831614257059	0.0243841554114495	0.0173389517041819	0.0220290113213281	0.0260420994493249	NA	0.0433615445890044	0.0383465263133627	0.00970817177480916	0.0209508710228874	0.0571689333905746	0.0366089787021574	0.053820746	0.0127835741935799	0.0174088641828264	0.00674774686390478	NA	0.0257641462560461	0.0305554682926988	NA	0.0167927287630332	0.0690438418705284	0.0228469722802272	0.013273135289546	NA	0.0237901136978899	0.0285214332971356	NA	NA	0.0311943848852821	0.0327837301767014	0.0155186199514299
B0BCZ1	NA	0.00140874794273109	NA	NA	NA	NA	NA	NA	NA	NA	NA	NA	NA	NA	NA	NA	NA	NA	NA	NA	NA	NA	NA	NA	NA	NA	NA	NA	NA	NA	NA	NA	NA
B0QY01	NA	NA	NA	NA	0.00251113393987332	NA	NA	NA	NA	NA	NA	NA	0.00458196618400511	0.009456265	NA	NA	NA	NA	0.00186181071160845	NA	NA	NA	NA	NA	NA	NA	NA	NA	NA	NA	NA	NA	NA
B0QY60	NA	NA	NA	NA	NA	NA	NA	NA	NA	NA	NA	NA	NA	0.002525253	NA	NA	NA	NA	NA	NA	NA	NA	NA	NA	NA	NA	NA	NA	NA	NA	NA	NA	NA
B0QY89	NA	NA	0.00100013187836394	NA	NA	NA	NA	NA	NA	NA	NA	0.00423534764440248	0.00252366086846689	NA	NA	NA	NA	NA	NA	NA	NA	NA	NA	NA	NA	NA	NA	0.00192807829728255	NA	NA	NA	NA	NA
B0QY90	NA	NA	NA	NA	NA	NA	NA	NA	NA	NA	NA	NA	NA	NA	NA	NA	NA	NA	NA	0.00396971433393361	NA	NA	NA	NA	NA	NA	NA	NA	NA	NA	NA	NA	NA
B0QYF8	NA	NA	NA	NA	NA	0.0111583789817764	NA	NA	NA	NA	NA	NA	NA	NA	NA	NA	NA	NA	NA	NA	NA	NA	NA	NA	NA	NA	NA	NA	NA	NA	NA	NA	NA
B0QYN7	NA	NA	NA	NA	NA	NA	NA	NA	NA	NA	NA	NA	NA	NA	NA	NA	NA	NA	NA	0.0161492988586938	NA	NA	NA	NA	NA	NA	NA	NA	NA	NA	NA	NA	NA
B0QYT2	NA	NA	0.00412957460766795	NA	NA	NA	NA	NA	NA	NA	NA	NA	NA	NA	NA	NA	NA	NA	NA	NA	NA	NA	NA	NA	NA	NA	NA	NA	NA	NA	NA	NA	NA
B0QZ18	NA	NA	0.00373771718557101	NA	0.0157938744747946	0.00800735835221406	NA	0.015082404173227	NA	NA	NA	0.00522851864137529	0.0122609406179875	0.012408759	NA	NA	NA	NA	NA	NA	NA	0.0123555261731386	0.00372182544061603	NA	NA	NA	NA	0.00360283240268944	NA	NA	NA	NA	NA
B0QZ43	NA	NA	0.00124137495741123	NA	NA	NA	NA	NA	NA	NA	NA	NA	NA	NA	NA	NA	NA	NA	NA	NA	NA	NA	NA	NA	NA	NA	NA	NA	NA	NA	NA	NA	NA
B0QZK4	0.00644283199825538	NA	0.0123125527940122	0.00150754774155504	0.00435395660436219	NA	NA	NA	NA	NA	NA	NA	0.00510717144674172	0.001976285	NA	0.00944239765822839	NA	0.00351137090548768	0.00190228426400023	0.0036436992860352	NA	0.00223018110423655	0.00322460101999984	0.00561757064490099	0.00777686601052271	NA	NA	NA	NA	NA	NA	NA	NA
B0QZK8	NA	NA	NA	NA	0.0492948786270831	NA	0.0444277026597507	0.0329320374419407	0.0212088243978451	NA	0.0345169859772765	0.0261264823510305	NA	0.036144578	0.0129966695591161	NA	0.0427247434784946	NA	NA	NA	NA	NA	NA	NA	NA	NA	NA	0.00594684352427348	NA	NA	NA	NA	0.0223605032708122
B0YIW2	NA	NA	NA	NA	NA	NA	NA	NA	NA	NA	NA	NA	NA	NA	NA	NA	NA	NA	NA	NA	NA	0.00964505522712552	NA	NA	NA	NA	NA	NA	NA	NA	NA	NA	NA
B0YIW6	NA	NA	0.00433784362760416	NA	0.0022321192674844	NA	NA	NA	NA	NA	NA	NA	NA	NA	NA	NA	NA	NA	NA	0.00610211839653685	NA	NA	0.0018081212497919	NA	NA	NA	NA	NA	NA	NA	NA	NA	NA
B0YJC4	0.0153636732942338	0.0131932100356663	0.028532324205446	0.0141168361943524	0.0138268648447076	0.0176174902642314	NA	0.0101779260392532	NA	0.00888836963831281	0.0115946346316603	0.0125799393536152	0.0157569838016848	0.013259955	0.0165995555258315	0.0272060911143363	0.0107679453057513	NA	NA	0.0146580562117805	NA	0.0229962057631988	0.0121550006445868	0.0286251559631165	0.0127767300211183	0.0100192140921731	0.0113253407878089	0.0136405642389584	0.0325305712203742	0.00351537647832644	0.00737927063459738	0.00922446835186408	0.010460757176319
B0ZBE2	NA	NA	NA	NA	NA	NA	NA	NA	NA	NA	NA	NA	NA	NA	NA	NA	NA	NA	NA	NA	NA	NA	NA	NA	0.00655849094548045	NA	NA	NA	NA	NA	NA	NA	NA
B1AH49	NA	NA	0.00457202939568041	NA	NA	NA	NA	NA	NA	NA	NA	NA	NA	NA	NA	NA	NA	NA	NA	NA	NA	NA	NA	NA	NA	NA	NA	NA	NA	NA	NA	NA	NA
B1AHA8	NA	NA	NA	NA	NA	NA	NA	NA	NA	NA	NA	NA	NA	NA	NA	0.00280765003540032	NA	NA	NA	NA	NA	NA	NA	NA	NA	NA	NA	0.0192307025426946	NA	NA	NA	0.00568997598383219	NA
B1AHB1	NA	NA	NA	NA	NA	NA	NA	0.00334123269083503	NA	NA	NA	NA	NA	NA	NA	NA	NA	NA	NA	NA	NA	NA	NA	NA	NA	NA	NA	NA	NA	NA	NA	NA	NA
B1AHC9	0.000971995694206901	0.00088708211972051	0.00139441854754015	NA	0.00239681277930176	0.00178404318362569	NA	0.00328698553439415	0.00548463770677903	NA	0.00219645514218653	0.00539861562401948	0.00616393297339044	0.001416219	0.0029750127652965	0.00363169593035075	NA	NA	0.00221241243917779	NA	NA	0.000560758880493514	NA	NA	0.0017598814338242	NA	0.0056024566867698	NA	NA	NA	NA	0.00177930682106832	0.00152170085423124
B1AHF3	NA	NA	NA	0.0138379931628977	NA	0.0162821242046423	NA	NA	0.00598752506357314	NA	NA	NA	NA	0.017006803	NA	0.0250014533270345	NA	NA	NA	NA	NA	NA	NA	NA	NA	NA	NA	NA	NA	NA	NA	NA	0.00631265888465278
B1AHL2	NA	NA	NA	NA	NA	NA	NA	NA	0.00456916892504478	NA	NA	NA	NA	NA	NA	NA	NA	NA	NA	NA	NA	NA	NA	NA	NA	NA	NA	NA	NA	NA	NA	NA	NA
B1AJZ9-3	NA	NA	0.000740516850178741	NA	NA	NA	NA	0.00230579798484416	0.00127283650104644	NA	NA	NA	NA	NA	NA	NA	NA	NA	NA	NA	NA	NA	NA	NA	NA	NA	NA	NA	NA	NA	NA	NA	NA
B1AK85	NA	NA	NA	NA	0.00363148678975637	NA	NA	NA	NA	NA	NA	NA	0.00397573707277585	0.007692308	NA	NA	NA	NA	NA	NA	NA	NA	NA	NA	NA	NA	NA	0.00379683126036812	NA	NA	NA	NA	0.00356908040471494
B1AKG0	NA	NA	0.00346576850537244	NA	NA	NA	NA	NA	0.00446784859341671	NA	NA	NA	NA	NA	NA	0.00177675261788723	NA	NA	0.00266512945186136	NA	NA	NA	NA	NA	NA	NA	NA	NA	NA	NA	NA	NA	NA
B1AKJ5	NA	NA	NA	NA	NA	NA	NA	NA	NA	NA	NA	NA	0.00122620632070625	NA	NA	NA	NA	NA	NA	NA	NA	NA	NA	NA	NA	NA	NA	NA	NA	NA	NA	NA	NA
B1AKQ8	NA	0.00926876815575896	NA	0.00316851270033083	NA	NA	NA	NA	NA	NA	NA	0.00506658388518027	0.00483033436522902	NA	NA	NA	NA	NA	NA	NA	NA	0.00966758967254736	NA	NA	NA	0.00466912556618375	NA	NA	NA	NA	NA	NA	NA
B1AKR6	NA	NA	NA	NA	NA	NA	0.00711872476287645	0.012312428962933	NA	NA	NA	0.00549450552106225	0.0122227043657933	NA	NA	NA	NA	NA	NA	0.00149490093954564	NA	NA	NA	NA	NA	NA	NA	NA	NA	NA	NA	NA	NA
B1AKY9	NA	NA	0.00108167961358083	NA	NA	NA	NA	0.000769851510470125	NA	NA	NA	NA	NA	NA	NA	0.000332719188205702	NA	NA	NA	NA	NA	0.000715128125897916	NA	0.000600442035452852	NA	NA	NA	NA	NA	NA	NA	0.000263851781303233	NA
B1AKZ5	NA	NA	NA	NA	0.00874246760307382	NA	NA	NA	NA	NA	NA	NA	NA	NA	NA	NA	NA	NA	NA	NA	NA	NA	NA	NA	NA	NA	NA	NA	NA	NA	NA	NA	NA
B1AL79	NA	NA	NA	NA	NA	NA	NA	NA	NA	NA	NA	NA	NA	0.001655629	NA	NA	NA	NA	NA	NA	NA	NA	NA	NA	NA	NA	NA	NA	NA	NA	NA	NA	NA
B1ALA9	NA	NA	0.00269509089360656	NA	NA	NA	NA	NA	NA	NA	NA	NA	NA	NA	NA	NA	NA	NA	NA	NA	NA	NA	NA	NA	NA	NA	NA	NA	NA	NA	NA	NA	NA
B1ALD9	0.00458165787763256	0.00519089036766173	0.00352535367582749	0.00246525222055073	0.00460565312794895	0.0021463047884849	0.00271754474787192	0.0113574479496149	0.00727735845402644	0.00472436185005422	0.0107703378682275	0.0228763527372081	NA	NA	NA	0.00235124520837471	NA	0.00505847081529614	0.00436313484282568	0.00383042597583789	NA	0.00468893973325756	0.00258946968595658	0.00151333727330486	0.00149882432196223	0.0027678473023803	NA	0.00419299193479887	0.00387778808488166	NA	0.00332451644335237	0.00337731562450232	NA
B1ANL0	NA	NA	NA	NA	NA	NA	0.0308380003136268	NA	NA	NA	NA	NA	NA	NA	NA	NA	0.00837344454532921	NA	NA	NA	NA	NA	NA	NA	NA	NA	NA	NA	0.00731927973223036	NA	NA	NA	NA
B1ANM7	NA	NA	NA	NA	NA	NA	NA	0.00500615180470306	NA	NA	NA	NA	NA	NA	NA	NA	NA	NA	NA	NA	NA	NA	NA	NA	NA	NA	NA	NA	NA	NA	NA	NA	NA
B1ANR0	NA	NA	NA	NA	NA	NA	NA	NA	NA	NA	NA	NA	NA	NA	NA	NA	NA	NA	0.000988758468325626	NA	NA	NA	NA	NA	NA	NA	0.00168510779808724	NA	NA	NA	NA	NA	NA
B1AR63	NA	NA	NA	NA	NA	NA	NA	0.00223313618793524	NA	NA	NA	NA	0.00253355743182207	NA	NA	NA	NA	NA	NA	NA	NA	NA	NA	NA	NA	NA	NA	NA	NA	NA	NA	NA	NA
B1N7B6	NA	NA	NA	NA	NA	NA	NA	NA	NA	NA	NA	NA	NA	NA	NA	NA	NA	NA	NA	NA	NA	NA	NA	NA	NA	NA	NA	NA	NA	NA	0.00381000128065433	NA	NA
B1N7B9	NA	NA	NA	NA	NA	NA	NA	NA	NA	NA	NA	NA	NA	NA	NA	NA	NA	NA	NA	0.0167610147245534	NA	NA	NA	NA	NA	NA	NA	NA	NA	NA	NA	NA	NA
B1PS43	NA	NA	NA	NA	NA	NA	NA	NA	NA	NA	NA	0.00034203393583623	0.000342172592628965	NA	NA	NA	NA	NA	NA	0.000348967045339257	NA	NA	NA	NA	NA	NA	NA	NA	NA	NA	NA	NA	0.000325257707958606
B1Q387	NA	NA	NA	NA	NA	NA	NA	NA	NA	NA	NA	NA	NA	NA	NA	0.128578902224714	NA	NA	NA	NA	NA	NA	NA	0.0580100130266379	NA	NA	NA	NA	NA	NA	NA	NA	NA
B2M0Y1	NA	NA	0.0434774086359662	NA	NA	NA	NA	NA	NA	NA	0.0154442581524154	NA	0.0487590372898564	NA	NA	NA	NA	0.0893964076514459	NA	NA	NA	NA	NA	NA	NA	0.136824873243	NA	NA	NA	NA	NA	NA	0.0622531401116564
B2M1S6	NA	NA	NA	NA	NA	NA	NA	NA	NA	NA	NA	NA	NA	NA	NA	NA	NA	NA	NA	NA	NA	NA	NA	NA	NA	NA	NA	NA	NA	NA	0.0393220299405233	NA	NA
B2M1S8	NA	NA	NA	NA	NA	NA	NA	NA	NA	NA	NA	NA	NA	NA	0.0422476060220125	NA	NA	NA	NA	NA	NA	NA	NA	NA	NA	NA	NA	NA	NA	0.0467494230683576	NA	NA	NA
B2R582	NA	NA	0.00887245217209162	0.00503511138873395	NA	NA	NA	NA	0.00435725835141461	0.0105314649023892	NA	NA	NA	NA	NA	0.0103966437706371	NA	NA	NA	0.00547637114762635	NA	NA	NA	NA	NA	NA	NA	NA	NA	NA	NA	NA	NA
B2R5B6	NA	NA	0.0284095417420871	0.0536040951035911	NA	0.0561033997425523	NA	0.0420516788039845	NA	NA	0.0660008657392628	NA	0.035097105506312	0.031514042	NA	0.0519540607584676	0.0619602674988807	0.0482659416470697	NA	0.0520875216281385	NA	NA	0.0744865045554706	0.0553565584470905	0.0435321723261044	NA	NA	0.0305197254808681	NA	NA	NA	NA	NA
B2R5M8	NA	NA	NA	NA	NA	NA	NA	NA	NA	NA	NA	NA	NA	NA	NA	NA	NA	NA	NA	0.00144416052029478	NA	NA	NA	NA	NA	NA	NA	NA	NA	NA	NA	NA	NA
B2R5W2	NA	0.00444445543369955	0.00605601362758738	0.0081835029479257	0.017926043100657	0.00584788866831448	0.0072746585723252	0.00388067387108688	0.0055642689830105	0.0018339276005607	0.012270344075323	0.00790933838161325	0.0106933617819488	0.015210728	0.0082247503823637	0.0149599979505516	0.0110635334262497	0.000765842397766877	0.00758174936418163	0.00756721979361759	NA	0.00564948443419706	0.0084720145519415	0.00889715295272026	0.00327924498085343	0.00516823941257142	0.00432194355384715	0.00766280926983481	NA	NA	0.00331075983947842	0.00814800268069074	0.00770824614506474
B2R6N6	NA	NA	NA	0.00532867886846595	NA	NA	NA	NA	NA	NA	NA	NA	NA	NA	NA	NA	NA	NA	NA	NA	NA	NA	NA	NA	NA	NA	NA	NA	NA	NA	NA	NA	NA
B2R7B5	NA	NA	NA	NA	NA	NA	NA	NA	NA	NA	NA	NA	0.00456547156718262	NA	NA	NA	NA	NA	NA	NA	NA	NA	NA	NA	NA	NA	0.00447396161105213	NA	NA	NA	NA	NA	NA
B2RBR9	NA	NA	NA	NA	NA	NA	NA	NA	NA	NA	NA	NA	NA	NA	NA	NA	NA	NA	NA	NA	NA	NA	NA	NA	NA	NA	NA	NA	NA	NA	0.0024083283535639	NA	NA
B2RCM2	NA	NA	NA	NA	NA	NA	NA	NA	NA	NA	NA	NA	NA	NA	NA	NA	NA	NA	NA	NA	NA	NA	NA	NA	NA	NA	NA	NA	NA	NA	NA	0.000810034969515828	NA
B2RDX5	NA	NA	NA	NA	0.00144622089032954	0.000891755916388746	NA	0.00377935918152351	NA	NA	NA	0.00161587037541693	0.00147205642919847	0.001987084	NA	NA	NA	0.000882639072727909	NA	0.001648624453541	NA	NA	NA	0.00141206691217465	NA	NA	NA	NA	NA	NA	NA	0.00124100695187218	NA
B2RDY9	NA	0.00227467486755532	NA	NA	NA	NA	NA	NA	NA	NA	NA	NA	NA	0.003849107	NA	0.00240839688012718	NA	NA	0.00481679376025435	NA	NA	NA	0.00350841808171388	NA	NA	NA	NA	NA	NA	NA	NA	NA	NA
B2RE46	NA	NA	NA	NA	NA	NA	NA	NA	NA	NA	NA	NA	NA	0.002222222	NA	NA	NA	NA	NA	NA	NA	NA	NA	NA	NA	NA	NA	NA	NA	NA	NA	NA	NA
B2RMN7	NA	NA	NA	NA	NA	NA	NA	NA	NA	NA	NA	NA	NA	NA	0.00293102781242656	NA	NA	NA	NA	NA	NA	0.00251521492477989	NA	NA	NA	NA	NA	NA	NA	NA	NA	NA	NA
B3GQS7	NA	NA	NA	NA	0.00789076792262614	NA	NA	NA	NA	NA	NA	NA	NA	NA	NA	NA	NA	NA	0.0137191796820812	0.00804690857529713	NA	NA	NA	NA	NA	NA	NA	NA	NA	NA	NA	NA	NA
B3KM46	NA	NA	NA	NA	NA	NA	NA	NA	NA	NA	NA	0.00166551271574307	NA	NA	NA	NA	NA	NA	NA	NA	NA	NA	NA	NA	NA	NA	NA	NA	NA	NA	NA	NA	NA
B3KM80	NA	NA	NA	NA	NA	NA	NA	0.00994861269716635	NA	NA	NA	NA	NA	NA	NA	NA	NA	NA	NA	NA	NA	NA	NA	NA	NA	NA	NA	0.00322856926824733	NA	NA	NA	NA	NA
B3KM81	NA	NA	0.00244423528796312	NA	NA	NA	NA	NA	NA	NA	NA	NA	NA	NA	NA	NA	NA	NA	NA	NA	NA	NA	NA	NA	NA	NA	NA	NA	NA	NA	NA	NA	NA
B3KMG3	NA	NA	NA	NA	NA	NA	NA	NA	NA	NA	NA	NA	NA	0.00214676	NA	NA	NA	NA	NA	NA	NA	NA	NA	NA	NA	NA	NA	NA	NA	NA	NA	NA	NA
B3KML9	NA	NA	NA	NA	NA	NA	NA	NA	NA	NA	NA	0.00356660888504914	NA	NA	NA	NA	NA	NA	NA	NA	NA	NA	NA	NA	NA	NA	NA	NA	NA	NA	NA	NA	NA
B3KNJ4	NA	NA	NA	NA	NA	NA	NA	0.00761805776754966	NA	NA	NA	NA	NA	NA	NA	NA	NA	NA	NA	NA	NA	NA	NA	NA	NA	NA	NA	NA	NA	NA	NA	NA	NA
B3KNQ8	NA	NA	0.00939319487514671	NA	NA	NA	NA	NA	0.00130588498136587	NA	NA	NA	NA	NA	NA	NA	NA	NA	NA	NA	NA	NA	NA	NA	NA	NA	NA	NA	NA	NA	NA	NA	NA
B3KP79	NA	NA	NA	NA	NA	NA	NA	NA	0.0137525968091783	NA	NA	NA	NA	NA	NA	NA	NA	NA	NA	NA	NA	NA	NA	NA	NA	NA	NA	NA	NA	NA	NA	NA	NA
B3KQ10	NA	NA	NA	NA	0.00421511869641577	NA	NA	NA	NA	NA	NA	NA	NA	NA	NA	NA	NA	NA	NA	NA	NA	NA	NA	NA	NA	NA	NA	NA	NA	NA	NA	NA	NA
B3KQH1	NA	NA	NA	NA	NA	NA	NA	0.00327783789250116	NA	NA	NA	NA	NA	NA	NA	NA	NA	0.00371900233173732	NA	NA	NA	NA	NA	NA	NA	NA	NA	NA	NA	NA	NA	NA	NA
B3KRY3	NA	NA	NA	NA	NA	NA	NA	NA	NA	NA	NA	0.00383126864396381	NA	NA	NA	NA	NA	NA	NA	NA	NA	NA	NA	NA	NA	NA	NA	NA	NA	NA	NA	NA	NA
B3KS35	NA	NA	NA	NA	NA	NA	NA	NA	NA	NA	NA	NA	NA	0.004424779	NA	NA	NA	NA	NA	NA	NA	NA	NA	NA	NA	NA	NA	NA	NA	NA	NA	NA	NA
B3KS36	NA	NA	NA	NA	NA	NA	NA	NA	NA	NA	NA	NA	NA	NA	NA	NA	NA	NA	NA	NA	NA	NA	NA	NA	NA	NA	0.00863617847183847	NA	NA	NA	NA	NA	NA
B3KS49	NA	NA	NA	NA	NA	NA	0.00770905757849138	NA	NA	NA	NA	NA	NA	NA	NA	NA	NA	NA	NA	NA	NA	NA	NA	NA	0.00246609904767356	NA	NA	NA	NA	NA	NA	NA	NA
B3KSM6	NA	NA	0.00361987309886314	NA	NA	NA	NA	NA	NA	NA	NA	NA	NA	NA	NA	NA	NA	NA	NA	NA	NA	NA	NA	NA	NA	NA	NA	NA	NA	NA	NA	NA	NA
B3KT32	NA	NA	NA	NA	NA	NA	NA	NA	NA	NA	NA	NA	0.00159520321029226	NA	NA	NA	NA	NA	NA	NA	NA	NA	NA	NA	NA	NA	NA	NA	NA	NA	NA	NA	NA
B3KT93	NA	NA	NA	NA	NA	NA	NA	NA	NA	NA	NA	0.000975044522241513	NA	NA	NA	NA	NA	NA	NA	NA	NA	NA	NA	NA	NA	NA	NA	NA	NA	NA	NA	NA	NA
B3KTA8	NA	NA	NA	NA	NA	NA	NA	NA	NA	NA	NA	NA	0.000867190757186414	NA	NA	NA	NA	NA	NA	NA	NA	NA	NA	NA	NA	NA	NA	NA	NA	NA	NA	NA	NA
B3KTP9	NA	NA	NA	NA	NA	NA	NA	NA	NA	NA	NA	NA	NA	NA	NA	NA	NA	NA	NA	NA	NA	NA	NA	NA	NA	NA	NA	NA	NA	NA	0.00280119998527673	NA	NA
B3KTQ8	NA	NA	NA	NA	0	NA	NA	NA	NA	NA	NA	NA	NA	NA	NA	NA	NA	NA	0	NA	NA	NA	NA	NA	NA	NA	NA	NA	NA	NA	NA	NA	NA
B3KU02	NA	NA	NA	NA	NA	NA	NA	NA	NA	NA	NA	NA	NA	NA	NA	NA	NA	NA	NA	NA	NA	NA	NA	NA	0.00107281789182341	NA	NA	NA	NA	NA	NA	NA	NA
B3KUD3	NA	NA	NA	NA	NA	NA	NA	NA	NA	NA	0.00915415220119634	NA	NA	NA	NA	NA	NA	NA	NA	NA	NA	NA	NA	NA	NA	NA	NA	NA	NA	NA	NA	NA	NA
B3KUD7	NA	NA	NA	NA	NA	NA	NA	NA	NA	NA	NA	NA	NA	NA	NA	NA	NA	NA	NA	0.00193058843675403	NA	NA	NA	NA	NA	NA	NA	NA	NA	NA	NA	NA	NA
B3KUI1	NA	NA	NA	NA	NA	NA	NA	NA	NA	NA	NA	NA	NA	0.006218112	NA	NA	NA	NA	NA	0.0123462829750377	NA	NA	0.00531135476906595	NA	NA	NA	NA	NA	NA	NA	NA	NA	NA
B3KUZ8	NA	NA	NA	NA	NA	NA	NA	NA	NA	NA	NA	NA	NA	NA	NA	NA	NA	NA	NA	0.00298174412174797	NA	NA	NA	NA	NA	NA	NA	NA	NA	NA	NA	0.0033667751098609	NA
B3KVE3	NA	0.0151799725290073	NA	NA	NA	NA	NA	NA	0.013471931172998	NA	NA	NA	NA	0.006377551	NA	NA	NA	NA	NA	NA	NA	NA	NA	0.0209480606280902	NA	NA	0.0136958004484161	NA	NA	NA	NA	NA	NA
B3KVK2	NA	0.00307999445492202	NA	NA	0.00879676871446086	0.0148662872132181	NA	0.00565912852319464	NA	NA	NA	0.00673446568498171	0.0128408891540401	0.00621118	NA	0.0130442361532142	NA	NA	NA	0.00687097491154194	NA	0.0140182780024258	NA	NA	NA	NA	NA	NA	NA	NA	NA	NA	NA
B3KVX6	NA	NA	NA	NA	NA	NA	NA	NA	NA	NA	NA	NA	NA	NA	NA	NA	NA	NA	NA	NA	NA	0.00153938733564629	NA	NA	NA	NA	NA	NA	NA	NA	NA	NA	NA
B3KW21	NA	NA	NA	NA	NA	0.00155031502981688	NA	NA	NA	NA	NA	0.00208509430834038	NA	NA	NA	NA	NA	NA	NA	NA	NA	NA	NA	NA	NA	NA	NA	NA	NA	NA	NA	NA	NA
B3KW54	NA	NA	NA	NA	NA	NA	NA	NA	NA	NA	NA	NA	NA	NA	NA	NA	NA	NA	NA	0.00237601183763877	NA	NA	NA	NA	NA	NA	NA	NA	NA	NA	NA	NA	NA
B3KW67	NA	NA	NA	NA	0.0032282464401217	NA	NA	NA	NA	NA	NA	NA	NA	NA	NA	NA	NA	NA	NA	NA	NA	NA	NA	NA	NA	NA	NA	NA	NA	NA	NA	NA	NA
B3KWE1	NA	NA	NA	NA	0.00467419068379867	NA	NA	NA	NA	NA	NA	0.00113857529296007	NA	0.007449316	NA	NA	NA	NA	NA	NA	NA	NA	NA	NA	NA	NA	NA	NA	NA	NA	NA	NA	NA
B3KWI4	NA	0.00466343961887035	NA	NA	0.00678294914889656	0.00500203157219158	NA	NA	NA	NA	NA	0.00169944970934814	0.00864110046118165	0.008881923	NA	NA	NA	NA	NA	0.00346779592103305	NA	NA	NA	NA	NA	NA	NA	NA	NA	NA	NA	NA	NA
B3KXA2	NA	NA	NA	NA	NA	NA	NA	NA	NA	NA	NA	NA	NA	NA	NA	NA	NA	NA	NA	NA	NA	NA	NA	NA	NA	NA	NA	NA	NA	NA	NA	NA	0.00119146742009784
B3KXA9	NA	0.00180977827763545	NA	NA	0.00172296857086576	NA	NA	NA	NA	NA	NA	NA	NA	NA	NA	NA	NA	NA	NA	NA	NA	NA	NA	NA	NA	NA	NA	NA	NA	NA	NA	NA	NA
B3KXN4	NA	NA	NA	NA	NA	NA	NA	NA	NA	NA	NA	0.00214702769529613	NA	NA	NA	NA	NA	NA	NA	NA	NA	NA	NA	NA	NA	NA	NA	NA	NA	NA	NA	NA	NA
B3KXV3	NA	NA	NA	NA	NA	NA	NA	NA	NA	NA	NA	NA	0.00397573707277585	NA	NA	NA	NA	NA	NA	NA	NA	NA	NA	NA	NA	NA	NA	NA	NA	NA	NA	NA	NA
B3KYB3	NA	NA	NA	NA	NA	NA	NA	NA	NA	NA	NA	0.0132225487963906	NA	NA	NA	NA	NA	NA	NA	NA	NA	NA	NA	NA	NA	NA	NA	NA	NA	NA	NA	NA	NA
B3VL05	NA	NA	NA	0.0401312645964383	NA	NA	NA	NA	NA	NA	NA	NA	NA	NA	NA	NA	NA	NA	NA	NA	NA	NA	NA	NA	NA	NA	NA	NA	NA	NA	NA	NA	NA
B4DDB6	NA	NA	0.00959936646758784	NA	NA	NA	NA	NA	NA	NA	NA	NA	NA	NA	NA	NA	NA	NA	NA	NA	NA	NA	NA	NA	NA	NA	NA	NA	NA	NA	NA	NA	NA
B4DDD6	NA	NA	NA	NA	0.00266573598608402	NA	NA	NA	NA	NA	NA	0.00355491525961685	0.00338915327035849	NA	NA	NA	NA	NA	NA	NA	NA	NA	0.00167177052092092	NA	NA	NA	NA	NA	NA	NA	NA	NA	NA
B4DDD8	NA	NA	NA	NA	NA	NA	NA	NA	NA	NA	NA	NA	NA	0.006265664	NA	NA	NA	NA	NA	NA	NA	NA	NA	NA	NA	NA	NA	NA	NA	NA	NA	NA	NA
B4DDI8	NA	NA	NA	NA	NA	NA	NA	NA	NA	NA	NA	NA	NA	NA	NA	NA	NA	NA	NA	NA	NA	NA	NA	NA	NA	NA	0.0131587103049325	NA	NA	NA	NA	NA	NA
B4DDQ3	NA	NA	NA	NA	0.00786822074834779	NA	NA	NA	NA	NA	NA	NA	NA	NA	NA	NA	NA	NA	NA	NA	NA	NA	NA	NA	NA	NA	NA	NA	NA	NA	NA	0.00925239596918466	NA
B4DDT3	NA	NA	NA	NA	NA	NA	NA	NA	NA	NA	NA	NA	NA	0.002352941	NA	NA	NA	NA	NA	NA	NA	NA	NA	NA	NA	NA	NA	NA	NA	NA	NA	NA	NA
B4DE00	NA	NA	0.00758618120563262	NA	NA	0.00886471209356608	NA	NA	NA	NA	NA	NA	NA	NA	NA	NA	NA	NA	NA	NA	NA	NA	NA	NA	NA	NA	NA	NA	NA	NA	NA	NA	NA
B4DE22	NA	NA	NA	NA	0.00234872252689308	NA	NA	NA	NA	NA	NA	NA	NA	NA	NA	NA	NA	NA	NA	NA	NA	NA	NA	NA	NA	NA	NA	NA	NA	NA	NA	NA	NA
B4DE30	NA	NA	NA	NA	NA	NA	0.00113044083726863	NA	NA	NA	NA	NA	NA	NA	NA	0.00112667453424219	NA	NA	NA	NA	NA	NA	NA	NA	NA	NA	NA	NA	NA	NA	NA	NA	NA
B4DE78	NA	NA	NA	NA	NA	NA	NA	NA	NA	NA	NA	NA	NA	NA	NA	NA	NA	NA	NA	NA	NA	NA	NA	NA	NA	NA	0.00216133416781407	NA	NA	NA	NA	NA	NA
B4DE89	NA	NA	0.00822598057066619	NA	NA	NA	NA	NA	NA	NA	NA	NA	NA	NA	NA	NA	NA	NA	NA	NA	NA	NA	NA	NA	NA	NA	NA	NA	NA	NA	NA	NA	NA
B4DEA3	NA	0.00247939558580014	NA	NA	NA	NA	NA	NA	NA	NA	NA	NA	NA	NA	NA	NA	NA	NA	NA	NA	NA	NA	NA	NA	NA	NA	NA	NA	NA	NA	NA	NA	NA
B4DEB1	NA	NA	NA	NA	NA	0.00992611892146134	NA	NA	0.0103029517562006	NA	0.0106106567991054	NA	0.0267383568713161	NA	NA	0.0166337584823634	0.0146852586841884	NA	NA	NA	0.0284016708422347	NA	NA	NA	0.00940933695881778	NA	NA	NA	NA	NA	NA	NA	NA
B4DEC0	NA	NA	NA	NA	NA	NA	NA	NA	NA	NA	NA	NA	NA	NA	NA	NA	NA	NA	NA	0.00133280328728986	NA	NA	NA	NA	NA	NA	NA	NA	NA	NA	NA	NA	NA
B4DEC3	NA	NA	NA	NA	NA	NA	NA	NA	NA	NA	NA	NA	NA	NA	NA	NA	NA	NA	0.000764236518727647	NA	NA	NA	NA	NA	NA	NA	NA	NA	NA	NA	NA	NA	NA
B4DEH8	NA	NA	NA	NA	0.00562015794715886	NA	NA	NA	NA	NA	NA	NA	NA	NA	NA	NA	NA	NA	NA	NA	NA	NA	NA	NA	NA	NA	NA	NA	NA	NA	NA	NA	NA
B4DF68	NA	NA	NA	NA	NA	NA	NA	NA	NA	NA	NA	NA	NA	NA	NA	NA	NA	NA	NA	NA	NA	NA	NA	0.00241708348131955	NA	NA	NA	NA	NA	NA	NA	NA	NA
B4DF77	NA	NA	NA	NA	NA	NA	NA	NA	NA	NA	NA	0.0043139882241525	NA	0.00265252	NA	NA	NA	NA	NA	NA	NA	NA	NA	NA	NA	NA	NA	NA	NA	NA	NA	NA	NA
B4DHM5	NA	NA	NA	NA	NA	NA	0.00870720042321726	NA	NA	NA	NA	NA	NA	NA	NA	NA	NA	NA	NA	NA	NA	NA	NA	NA	NA	NA	NA	NA	NA	NA	NA	NA	NA
B4DHW0	NA	NA	NA	NA	NA	NA	NA	NA	NA	NA	NA	NA	NA	NA	NA	NA	NA	NA	NA	NA	NA	NA	NA	NA	NA	0.0128928119757073	NA	NA	NA	NA	NA	NA	NA
B4DHY1	NA	NA	NA	NA	0.00723126118661128	NA	NA	NA	NA	NA	NA	NA	NA	NA	NA	NA	NA	NA	NA	NA	NA	NA	NA	NA	NA	NA	NA	NA	NA	NA	NA	NA	NA
B4DI38	NA	NA	NA	NA	0.00571541503755226	NA	NA	NA	NA	NA	NA	NA	NA	NA	NA	NA	NA	NA	NA	NA	NA	NA	NA	NA	NA	NA	NA	NA	NA	NA	NA	0.00302439074874114	NA
B4DIT7	NA	NA	NA	NA	NA	NA	NA	NA	NA	NA	NA	NA	NA	NA	NA	NA	NA	NA	NA	NA	NA	NA	NA	NA	NA	NA	NA	NA	NA	NA	NA	NA	0.00259206938104107
B4DJ81	NA	NA	0.00282390038861031	NA	0.00173563672150616	0.00146658817784436	NA	0.00488498655000797	NA	NA	NA	0.00298965722453405	0.00538381005946769	0.004656863	NA	NA	NA	NA	0.00193025893993602	0.00532100599278839	NA	NA	0.0018745956208856	NA	NA	NA	NA	0.00181466163650826	NA	NA	NA	NA	NA
B4DJC3	NA	NA	0.00896117704201827	0.0063568281918449	NA	NA	NA	NA	NA	NA	NA	NA	0.0155053739636109	0.01	NA	0.0210012206266992	NA	NA	NA	0.00829670237162094	NA	NA	NA	NA	NA	NA	NA	NA	NA	NA	NA	0.00832715645553776	NA
B4DJF2	NA	0.0105506196406506	0.0108950482061427	0.00563548584140966	0.0134764215173215	0.00636561746789442	0.0280205116920214	0.0282705585792246	0.0205996340885885	NA	0.0228583230668734	0.0163406320618684	0.0357393370621931	0.046099291	0.0229515652309696	0.0156392068273279	NA	NA	0.0251344393564089	0.0166718605733219	NA	0.0300125376411266	0.0122048158866448	NA	NA	NA	0.0285572021153596	0.0210037468096762	NA	NA	0.0306421380818736	0.0188246888134809	0.00987192424726574
B4DJI1	NA	NA	NA	NA	NA	NA	NA	0.00965486952475452	NA	NA	NA	NA	NA	NA	NA	NA	NA	NA	NA	NA	NA	NA	NA	NA	NA	NA	NA	NA	NA	NA	NA	NA	NA
B4DJK0	NA	NA	NA	0.00410117941299074	NA	NA	NA	NA	NA	NA	NA	NA	NA	NA	NA	NA	NA	NA	NA	NA	NA	NA	0.0041120167927827	NA	NA	NA	NA	NA	NA	NA	NA	NA	0.00498903684548428
B4DJL0	NA	0.00477955764821925	NA	NA	NA	NA	NA	NA	NA	NA	NA	NA	NA	NA	NA	NA	NA	NA	NA	NA	NA	NA	NA	NA	NA	NA	NA	NA	NA	NA	NA	NA	NA
B4DKR8	NA	NA	0.00129488291363001	NA	NA	NA	NA	NA	NA	NA	NA	NA	NA	NA	NA	NA	NA	NA	NA	NA	NA	NA	NA	NA	NA	NA	NA	NA	NA	NA	NA	NA	NA
B4DKW1	NA	NA	NA	NA	NA	NA	NA	NA	NA	NA	NA	NA	NA	NA	NA	NA	NA	NA	NA	NA	NA	NA	NA	NA	NA	NA	NA	0.016272132844805	NA	NA	NA	NA	0.0237938687461257
B4DKX5	NA	NA	NA	NA	NA	NA	NA	NA	NA	NA	NA	NA	NA	NA	NA	NA	NA	NA	0.00133159919481236	NA	NA	NA	NA	NA	NA	NA	NA	NA	NA	NA	NA	NA	NA
B4DKY1	NA	NA	NA	NA	NA	NA	NA	NA	0.00131564426414476	NA	NA	NA	0.000944246263635975	0.000747384	NA	NA	NA	NA	NA	NA	NA	NA	NA	NA	NA	NA	NA	NA	NA	NA	NA	NA	NA
B4DL19	NA	0.0139345879943917	NA	NA	0.0501827821957439	0.0159704598061527	NA	NA	NA	NA	NA	NA	NA	NA	NA	0.0138380140389364	NA	NA	NA	NA	NA	0.0158554610416979	NA	NA	NA	NA	NA	NA	0.0240287997079414	NA	NA	0.0167430712390195	NA
B4DL39	NA	NA	NA	NA	NA	NA	NA	NA	NA	NA	NA	NA	NA	NA	NA	NA	NA	NA	NA	NA	NA	NA	NA	NA	NA	NA	0.00170436641323817	NA	NA	NA	NA	NA	NA
B4DL61	NA	NA	NA	NA	0.00151798473154396	NA	NA	NA	NA	NA	NA	NA	NA	NA	NA	NA	NA	NA	NA	NA	NA	NA	NA	NA	NA	NA	NA	NA	NA	NA	NA	NA	NA
B4DLN6	NA	NA	NA	NA	NA	NA	NA	NA	NA	NA	NA	NA	NA	0.003597122	NA	NA	NA	NA	NA	NA	NA	NA	NA	NA	NA	NA	NA	NA	NA	NA	NA	NA	NA
B4DM10	NA	NA	NA	NA	NA	0.0023762935407539	NA	NA	NA	NA	0.000877514509622735	NA	NA	NA	NA	NA	NA	NA	NA	NA	NA	NA	NA	NA	NA	NA	NA	NA	NA	NA	NA	NA	NA
B4DM82	0.0236338920151792	0.0288301807920154	0.0525298975117064	0.0315377523326936	0.0559924572627164	0.0127129591792126	NA	0.0323325853619596	NA	NA	NA	0.0588352170073546	NA	NA	NA	0.0176366843741238	NA	0.0290769328302617	NA	0.0400185476331698	NA	0.0454887702259045	0.0338169999247591	0.0495783245468667	NA	NA	0.0569360748052796	0.0286969788721974	NA	NA	NA	0.0435723299613914	0.0521528391269842
B4DMG8	NA	NA	NA	NA	NA	NA	NA	NA	NA	NA	NA	NA	NA	NA	NA	NA	NA	NA	NA	NA	NA	0.00162136739757029	NA	NA	NA	NA	NA	NA	NA	NA	NA	NA	NA
B4DMT8	NA	NA	NA	NA	NA	0.00719892558880506	NA	NA	NA	NA	NA	0.00651674740214174	NA	NA	NA	NA	NA	NA	NA	NA	NA	NA	NA	NA	NA	NA	NA	NA	NA	NA	NA	NA	NA
B4DMU8	NA	NA	NA	NA	NA	NA	NA	0.00997992332601619	0.00555660449577758	NA	NA	0.00640008112581909	NA	NA	NA	NA	NA	NA	NA	NA	NA	NA	NA	NA	NA	NA	NA	NA	NA	NA	NA	NA	0.00723504827570811
B4DMV6	NA	NA	NA	NA	NA	NA	NA	NA	NA	NA	NA	NA	NA	NA	NA	NA	NA	NA	NA	NA	NA	NA	NA	NA	NA	NA	NA	NA	NA	NA	NA	NA	0.00987192424726574
B4DN38	NA	NA	NA	NA	NA	NA	NA	NA	NA	NA	NA	NA	NA	NA	NA	NA	NA	NA	NA	NA	NA	NA	NA	NA	NA	NA	0.000517819896032462	NA	NA	NA	NA	NA	NA
B4DN58	NA	NA	NA	NA	0.0483021344747741	0.0272405221940635	NA	NA	0.015280663023513	NA	NA	NA	NA	NA	NA	NA	NA	NA	0.0204178529203749	0.0432211366973266	NA	NA	NA	NA	NA	NA	0.0267832244386227	NA	NA	NA	NA	NA	0.0354429494111214
B4DN60	NA	NA	NA	NA	NA	NA	NA	NA	NA	NA	NA	NA	0.00786077287632257	NA	NA	NA	NA	NA	NA	NA	NA	NA	NA	NA	NA	NA	NA	NA	NA	NA	NA	NA	NA
B4DN66	NA	NA	0.0276295281200452	NA	NA	NA	NA	NA	NA	NA	NA	NA	NA	NA	NA	NA	NA	NA	NA	0.0159169347747122	NA	NA	NA	NA	NA	NA	NA	0.0177549660981989	NA	NA	NA	NA	NA
B4DNA0	NA	NA	NA	NA	NA	0.00461170012214876	NA	NA	NA	NA	NA	NA	NA	NA	NA	NA	NA	NA	NA	NA	NA	NA	NA	NA	NA	NA	NA	NA	NA	NA	NA	NA	NA
B4DNE0	NA	NA	NA	NA	NA	NA	NA	NA	NA	NA	NA	NA	NA	NA	NA	NA	NA	NA	NA	NA	NA	NA	NA	NA	NA	NA	NA	NA	NA	NA	0.00245389950419715	NA	NA
B4DNG0	0.00268098145087778	0.00434981690418956	0.0103873294217669	0.00780663152319773	NA	0.00910892924077025	NA	NA	0.00442737151040484	NA	0.0139373295046596	0.0106998255708984	NA	NA	NA	0.00345414846098954	NA	NA	NA	NA	NA	NA	NA	0.01506436937804	NA	NA	NA	NA	NA	NA	NA	NA	NA
B4DNK4	NA	0.00643838437204178	0.0143343080136231	0.0112203103048616	0.0119206712130478	0.00672315675192704	0.00872480033056391	0.0067960546759727	0.00714900645819335	0.00353727064829673	0.00470759852688938	0.00982075009587647	0.00878834259341489	0.014154775	0.00570753171206929	0.00560203569985282	0.00454650033417277	0.0101867656782537	0.0093234477946598	0.00966734968399523	NA	0.00452536441815756	0.00826543054222994	0.00716851122673465	0.00496730897486821	NA	0.00662795490265479	0.00520338344307394	0.00747542213236126	NA	NA	0.00985103274862634	0.00639882654698263
B4DNL3	NA	NA	NA	NA	NA	NA	NA	NA	NA	NA	NA	NA	NA	NA	0.00172595768465742	NA	NA	NA	NA	NA	NA	NA	NA	NA	NA	NA	NA	NA	NA	NA	NA	NA	NA
B4DNP4	NA	NA	NA	NA	NA	0.00430480591393146	NA	NA	NA	NA	NA	NA	NA	NA	NA	NA	NA	NA	NA	NA	NA	NA	NA	NA	NA	NA	NA	NA	NA	NA	NA	NA	NA
B4DNV4	NA	NA	0.00708975043192615	NA	NA	NA	NA	NA	NA	NA	NA	NA	NA	NA	NA	NA	NA	NA	NA	NA	NA	NA	NA	NA	NA	NA	NA	NA	NA	NA	NA	NA	NA
B4DNX1	NA	NA	NA	NA	NA	NA	NA	NA	NA	NA	NA	0.00409636427097526	NA	NA	NA	NA	NA	NA	NA	NA	NA	NA	NA	NA	NA	NA	NA	NA	NA	NA	NA	NA	NA
B4DP35	NA	NA	NA	NA	0.0158877539970442	NA	NA	NA	NA	NA	NA	NA	NA	NA	NA	NA	NA	NA	NA	NA	NA	NA	NA	NA	NA	NA	NA	NA	NA	NA	NA	NA	NA
B4DP50	NA	NA	0.0023597564797526	NA	NA	NA	NA	NA	NA	NA	NA	NA	NA	NA	NA	NA	NA	NA	NA	NA	NA	NA	NA	NA	NA	NA	NA	NA	NA	NA	NA	NA	NA
B4DPF1	NA	NA	NA	NA	0.00621175312299178	0.00104976816997699	NA	NA	0.00347433987593297	NA	NA	NA	NA	0.002302632	NA	NA	NA	NA	NA	NA	NA	NA	NA	0.00623353173169038	NA	NA	0.00470943336898038	NA	NA	NA	NA	NA	0.00122100070268623
B4DPH4	NA	NA	NA	NA	NA	NA	NA	NA	NA	NA	NA	NA	NA	NA	0.0063083246374159	NA	NA	NA	NA	NA	NA	NA	NA	NA	NA	NA	NA	NA	NA	NA	NA	NA	NA
B4DPP8	0.00438181865475698	NA	NA	NA	NA	0.00428937679373119	NA	NA	0.00410113262893906	NA	NA	NA	NA	NA	NA	NA	NA	0.00993655849762489	NA	NA	NA	NA	NA	0.0123663492829169	NA	0.00402900361750943	NA	NA	0.0182522907761558	NA	NA	NA	NA
B4DPR2	NA	NA	NA	NA	0.0165008199745141	NA	NA	NA	0.00414089149633517	0.00867620949493668	NA	NA	NA	NA	NA	NA	NA	NA	NA	NA	NA	NA	NA	NA	NA	NA	NA	NA	NA	NA	NA	NA	NA
B4DPW5	NA	NA	NA	NA	NA	NA	NA	NA	NA	NA	NA	NA	NA	NA	NA	NA	NA	NA	NA	NA	NA	0.00075685561292097	NA	NA	NA	NA	NA	NA	NA	NA	NA	NA	NA
B4DQ75	NA	NA	NA	NA	NA	NA	NA	0.00397290560825671	NA	NA	NA	NA	NA	0.004360465	NA	NA	NA	NA	NA	NA	NA	NA	NA	NA	NA	NA	NA	NA	NA	NA	NA	NA	NA
B4DQU5	NA	NA	NA	NA	NA	NA	NA	NA	NA	NA	NA	NA	0.00354004019916478	NA	NA	NA	NA	NA	NA	NA	NA	NA	NA	NA	NA	NA	NA	NA	NA	NA	NA	NA	NA
B4DQV1	NA	NA	NA	NA	NA	NA	NA	NA	NA	NA	NA	NA	NA	NA	NA	NA	NA	NA	NA	NA	NA	0.00256047565576187	NA	NA	NA	NA	NA	NA	NA	NA	NA	NA	NA
B4DQZ0	NA	NA	NA	NA	NA	NA	NA	NA	0.00102823127390755	NA	NA	NA	NA	NA	NA	NA	NA	NA	NA	NA	NA	NA	NA	NA	NA	NA	NA	NA	NA	NA	NA	NA	NA
B4DR61	NA	NA	NA	NA	NA	NA	NA	NA	NA	NA	NA	NA	NA	NA	NA	NA	NA	NA	NA	0.007326007	NA	0.00560498993529687	NA	NA	NA	NA	NA	NA	NA	NA	NA	NA	NA
B4DRK5	NA	NA	NA	NA	NA	NA	NA	NA	NA	NA	NA	NA	NA	0.008888889	NA	NA	NA	NA	NA	NA	NA	NA	NA	NA	NA	NA	NA	NA	NA	NA	NA	NA	NA
B4DRV9	NA	NA	NA	NA	NA	NA	NA	NA	NA	0.00494733959834231	NA	NA	NA	NA	NA	NA	NA	NA	NA	NA	NA	NA	NA	NA	NA	NA	NA	0.0158789949035563	NA	NA	NA	NA	NA
B4DSR6	NA	NA	NA	NA	NA	NA	NA	NA	NA	NA	NA	NA	NA	0.00388601	NA	NA	NA	NA	NA	NA	NA	NA	NA	NA	NA	NA	NA	NA	NA	NA	NA	NA	NA
B4DSU6	NA	NA	NA	NA	NA	NA	NA	NA	NA	NA	NA	NA	0.0331129654955165	NA	NA	NA	NA	NA	NA	NA	NA	NA	NA	NA	NA	NA	NA	NA	NA	NA	NA	NA	NA
B4DSU9	NA	NA	NA	NA	NA	NA	NA	0.00400366500968173	NA	NA	NA	NA	NA	NA	NA	NA	NA	NA	NA	0.0062498704972786	NA	NA	NA	NA	NA	NA	NA	NA	NA	NA	NA	0.00470460857156679	NA
B4DT28	NA	0.00276370787762384	0.00688879680485978	0.00114023800352011	0.0137689663826505	0.00551559971910879	NA	0.0052214767258753	0.00973577001913657	NA	0.00613515935020374	0.00266541798323604	0.00607429020435722	0.005074152	0.00601210391361591	0.00229133292617086	0.00292238930322496	NA	0.00679904332197383	0.00213583889738509	NA	0.00200307849157421	0.00503946199700748	0.00303490355698019	NA	NA	0.00423543950609746	0.00339387881445049	NA	NA	NA	0.00280061340788018	0.00433464533702098
B4DTM7	NA	NA	NA	NA	NA	NA	NA	NA	NA	NA	NA	NA	NA	NA	NA	NA	NA	NA	NA	NA	NA	NA	NA	NA	NA	NA	NA	NA	NA	NA	NA	NA	0.00662153529940668
B4DUC8	NA	NA	0.0034137813889145	NA	0.00236046631892299	NA	NA	0.00164507765993341	0.00176033239157483	NA	NA	0.00722832700786324	0.00344563831401633	0.006666667	NA	0.00350020308776286	NA	NA	NA	NA	NA	NA	NA	0.00157916177629356	NA	NA	NA	NA	NA	NA	NA	NA	NA
B4DUI5	NA	NA	NA	0.0092773025415925	NA	NA	NA	NA	NA	NA	NA	NA	NA	NA	NA	NA	NA	NA	NA	NA	NA	NA	NA	NA	NA	NA	NA	NA	0.00415790138316873	NA	NA	NA	NA
B4DUK1	NA	NA	NA	0.00503511138873395	NA	NA	NA	NA	NA	NA	NA	NA	NA	NA	NA	NA	NA	NA	NA	NA	NA	NA	NA	NA	NA	NA	NA	NA	NA	NA	NA	NA	NA
B4DUR2	NA	NA	NA	NA	NA	NA	NA	0	NA	NA	NA	NA	NA	NA	NA	NA	NA	NA	NA	NA	NA	NA	NA	NA	NA	NA	NA	NA	NA	NA	NA	NA	NA
B4DUR8	0.00533854742649	0.00324811631904572	0.0103233353522072	NA	0.00594017391950747	0.00609690871657898	NA	0.00563647535383355	0.000960880076439706	NA	0.00536165252652838	0.00572111030868137	0.0109086818091067	0.004366812	NA	0.00420330085300206	NA	NA	0.00878871996536794	NA	NA	0.00307988960103753	0.00204104516179662	0.00999905770994259	NA	NA	0.00366317776080475	0.00215540619405133	NA	NA	NA	0.00636354717878596	0.00303917299078652
B4DUT2	NA	NA	0.00591985289500562	NA	NA	NA	0	NA	0.00127191672737184	NA	NA	NA	NA	NA	NA	NA	NA	NA	NA	NA	NA	NA	NA	NA	NA	NA	NA	NA	0.00255963328052318	NA	NA	NA	NA
B4DV12	0.00288541411679537	0.00972312037213154	0.0145029942343966	0.000969811948243008	0.00396474969908678	0.00604017145596355	0.00106009494001459	0.00354425202919784	0.00214017339436406	0.00347607193653568	0.00450289253510455	0.0147342120007091	0.00195459607124521	0.006708336	0.00343384567108004	0.00231631072792323	0.00136518912634881	0.0116127691693776	0.0122964666915799	0.00332373751218713	NA	0.00270798153810074	0.00231551797771283	0.00191521144089952	0.00162697657278021	0.00145126076039531	0.00404877240579953	0.00175779437077091	0.0115769016125458	0.00166455584335744	0.0128120634312577	0.0107717847576593	0.00465195320422251
B4DV51	NA	NA	NA	NA	NA	NA	NA	NA	0.0169262727927965	NA	NA	0.0474938131144768	NA	NA	NA	NA	NA	NA	NA	NA	NA	NA	NA	NA	NA	NA	NA	NA	NA	NA	NA	0.0266896039814561	0.0535362042148023
B4DV79	NA	NA	NA	NA	NA	NA	NA	NA	NA	NA	NA	NA	NA	NA	NA	NA	NA	NA	0.00165624761393123	0.00174483743915025	NA	NA	NA	NA	NA	NA	NA	NA	NA	NA	NA	NA	NA
B4DVF4	NA	NA	NA	NA	NA	NA	NA	NA	NA	NA	NA	NA	NA	0.011111111	NA	NA	NA	NA	NA	NA	NA	NA	NA	NA	NA	NA	NA	NA	NA	NA	NA	NA	NA
B4DVQ0	NA	NA	NA	NA	NA	NA	NA	NA	0.0142433898022761	NA	NA	NA	0.0129299148091895	0.010726049	NA	NA	NA	NA	NA	NA	NA	NA	NA	NA	NA	NA	NA	NA	NA	NA	NA	NA	NA
B4DVR4	NA	NA	NA	NA	NA	NA	NA	NA	NA	NA	NA	NA	NA	0.002180233	NA	NA	NA	NA	NA	NA	NA	NA	NA	NA	NA	NA	NA	NA	NA	NA	NA	NA	NA
B4DW52	NA	NA	NA	NA	NA	NA	NA	NA	NA	NA	NA	0.0126520072159456	NA	NA	0.0165420034668366	NA	NA	NA	0.0124108918421645	0.0154290245140959	NA	NA	NA	NA	NA	NA	NA	0.0185829936061709	NA	NA	NA	NA	0.0108872182965534
B4DWL1	NA	NA	NA	NA	NA	NA	NA	NA	NA	NA	NA	NA	NA	NA	NA	NA	NA	NA	0.0016422124981864	NA	NA	NA	NA	NA	NA	NA	NA	NA	NA	NA	NA	NA	NA
B4DWQ5	NA	NA	NA	NA	NA	NA	NA	NA	NA	NA	NA	NA	NA	NA	NA	NA	NA	NA	NA	NA	NA	NA	NA	NA	NA	NA	0.00141357411998926	NA	NA	NA	NA	NA	NA
B4DXN0	NA	NA	NA	NA	NA	0.00178344960249797	NA	NA	NA	NA	NA	NA	NA	NA	NA	NA	NA	NA	NA	NA	NA	NA	NA	NA	NA	NA	NA	NA	NA	NA	NA	NA	NA
B4DXW1	NA	0.00640023539980043	0.00402297551797965	0.00513683081072858	0.00794769764930593	NA	NA	0.0122709721049875	NA	NA	NA	0.008214008012765	0.00333542508219138	0.005331089	0.00181603325877259	0.00510691827278498	0.00511710483105894	NA	0.00353555864268791	0.00900128599269356	NA	0.00379956659515596	0.00915627583576126	0.00372192975198097	0.00331236863771739	NA	0.00652766568438912	0.00830956261990516	NA	NA	NA	NA	0.0078111180309814
B4DXZ6	NA	NA	NA	NA	NA	NA	NA	NA	NA	NA	NA	NA	NA	0.002302026	NA	NA	NA	NA	0.00354532526034035	0.00203725084244359	NA	0.00207821663138931	NA	0.00174493014478569	NA	NA	NA	NA	NA	NA	NA	NA	NA
B4DY09	NA	NA	0.015759646206429	NA	0.00762233946958433	0.0082189261439213	0.00299309998086043	0.0116622174927626	0.00250047206710822	NA	NA	0.0124236860621643	0.00458847430630344	0.002840909	0.00612911089995305	0.00683633518944066	NA	NA	NA	0.00419025395769509	NA	NA	0.00531135476906595	0.00403762907867825	NA	NA	NA	NA	NA	NA	NA	0.00354850447419962	NA
B4DY23	NA	NA	0.00522517630590125	NA	NA	NA	NA	NA	NA	NA	NA	NA	NA	NA	NA	NA	NA	NA	NA	NA	NA	NA	NA	NA	NA	NA	NA	NA	NA	NA	NA	NA	NA
B4DYN5	NA	NA	NA	NA	NA	NA	NA	NA	NA	NA	NA	NA	NA	NA	NA	NA	NA	NA	0.00296069853083946	NA	NA	NA	NA	NA	NA	NA	NA	NA	NA	NA	NA	NA	NA
B4DYR6	NA	NA	NA	NA	NA	NA	NA	NA	NA	NA	NA	NA	0.000564488644519218	NA	NA	NA	NA	NA	NA	NA	NA	NA	NA	NA	NA	NA	NA	NA	NA	NA	NA	NA	NA
B4DYV8	NA	NA	NA	NA	NA	NA	NA	NA	NA	NA	NA	NA	NA	NA	NA	NA	NA	NA	NA	0.00212735966756129	NA	NA	NA	NA	NA	NA	NA	NA	NA	NA	NA	NA	NA
B4DZB4	NA	NA	NA	NA	NA	NA	NA	NA	NA	NA	NA	NA	0.000906747033550781	NA	NA	NA	NA	NA	NA	NA	NA	NA	NA	NA	NA	NA	NA	NA	NA	NA	NA	NA	NA
B4DZX4	NA	NA	NA	NA	NA	NA	NA	0.0167038610546668	NA	NA	NA	NA	NA	NA	NA	NA	NA	NA	NA	NA	NA	NA	NA	NA	NA	NA	NA	NA	NA	NA	NA	NA	NA
B4DZY4	NA	NA	NA	NA	NA	NA	NA	NA	0.00412255851464311	NA	NA	NA	NA	NA	NA	NA	NA	NA	NA	NA	NA	NA	NA	NA	NA	NA	NA	NA	NA	NA	NA	NA	NA
B4DZY9	NA	NA	NA	NA	NA	NA	NA	NA	NA	0.00187928921108927	NA	NA	NA	NA	NA	NA	NA	NA	NA	NA	NA	NA	NA	NA	NA	NA	NA	NA	NA	NA	NA	NA	NA
B4E0A4	NA	0.00430887811603506	NA	0.00818568359426864	NA	NA	NA	NA	NA	NA	NA	NA	NA	NA	NA	NA	NA	0.00608657744365353	NA	NA	NA	NA	NA	NA	NA	NA	NA	NA	NA	NA	NA	NA	NA
B4E0P5	NA	NA	0.00390349281604124	NA	0.00196296567918941	NA	NA	NA	NA	NA	NA	NA	NA	NA	NA	NA	NA	NA	NA	NA	NA	NA	NA	NA	NA	NA	NA	NA	NA	NA	NA	NA	NA
B4E0P8	NA	NA	NA	NA	NA	NA	NA	NA	NA	NA	NA	NA	NA	NA	NA	NA	NA	NA	NA	NA	NA	NA	NA	0.00473748438138381	NA	NA	NA	NA	NA	NA	NA	NA	NA
B4E108	NA	NA	NA	NA	NA	NA	NA	NA	NA	NA	NA	0.0049284050245088	NA	NA	NA	NA	NA	NA	NA	NA	NA	NA	0.00927072882480719	NA	NA	NA	NA	NA	NA	NA	NA	NA	NA
B4E1G1	NA	NA	0.00999530711401237	NA	NA	NA	NA	NA	NA	NA	NA	NA	NA	0.018018018	NA	NA	NA	NA	NA	NA	NA	NA	NA	NA	NA	NA	NA	NA	NA	NA	NA	NA	NA
B4E1L5	NA	NA	NA	NA	NA	NA	NA	0.00193033830784089	NA	NA	NA	NA	NA	0.004237288	NA	NA	NA	NA	NA	NA	NA	NA	NA	NA	NA	NA	NA	NA	NA	NA	NA	NA	NA
B4E1Q1	NA	NA	NA	NA	NA	NA	NA	NA	NA	NA	NA	NA	NA	0.010631172	NA	NA	NA	NA	NA	NA	NA	NA	NA	NA	NA	NA	NA	NA	NA	NA	NA	NA	NA
B4E1R7	NA	NA	NA	0.00175025449319721	NA	NA	NA	NA	NA	NA	NA	NA	NA	NA	NA	NA	NA	NA	NA	NA	NA	NA	NA	NA	NA	NA	NA	NA	NA	NA	NA	NA	NA
B4E1S2	NA	0.00698421339267334	0.0111188318399086	0.0143934619641337	0.00886560085650718	0.0168554390046666	NA	0.0272694275303324	0.0136363779043542	NA	0.0076858744610363	NA	0.014559036541873	0.033450704	NA	NA	NA	NA	NA	0.00779033139511427	NA	NA	NA	0.0161252399405446	NA	NA	NA	NA	NA	NA	NA	0.00586419508576366	0.00326746806763658
B4E1W2	NA	NA	0.00575356519727585	NA	NA	NA	NA	NA	NA	NA	NA	NA	NA	NA	NA	NA	NA	NA	NA	NA	NA	NA	NA	NA	NA	NA	NA	NA	NA	NA	NA	NA	NA
B4E1W8	NA	NA	NA	NA	NA	NA	NA	NA	NA	NA	NA	NA	NA	NA	NA	NA	NA	NA	NA	NA	NA	0.00258188162978194	NA	NA	NA	NA	NA	NA	NA	NA	NA	NA	NA
B4E1Z4	0.00291338065415223	NA	0.00163214782105244	NA	0.00126566598903554	NA	0.0028245875845328	NA	0.00517821928787619	NA	NA	NA	NA	NA	NA	NA	NA	NA	NA	NA	NA	NA	NA	NA	NA	NA	NA	NA	NA	NA	NA	NA	NA
B4E352	NA	NA	0.00145473699831086	NA	NA	0.00226654565587732	NA	NA	NA	NA	NA	NA	NA	NA	NA	NA	NA	NA	NA	0.00419025395769509	NA	NA	NA	NA	NA	NA	NA	NA	NA	NA	NA	NA	NA
B4E356	NA	NA	NA	NA	NA	NA	NA	NA	NA	NA	NA	NA	NA	NA	NA	NA	NA	NA	NA	NA	NA	NA	0.00160679624647337	NA	NA	NA	NA	NA	NA	NA	NA	NA	NA
B4E3A4	NA	NA	NA	0.0107288237421959	NA	NA	NA	NA	NA	NA	NA	NA	NA	NA	NA	NA	NA	NA	NA	NA	NA	NA	NA	NA	NA	NA	NA	NA	NA	NA	NA	NA	NA
B4E3A7	NA	NA	NA	NA	NA	NA	NA	NA	NA	NA	NA	NA	NA	NA	NA	NA	NA	NA	NA	NA	NA	NA	NA	NA	NA	NA	NA	NA	NA	NA	NA	NA	0.00348857423164141
B4E3J5	NA	NA	NA	NA	NA	NA	NA	NA	NA	NA	NA	NA	0.00765697437571126	NA	NA	NA	NA	NA	NA	0.00819427349659487	NA	NA	NA	NA	NA	NA	NA	NA	NA	NA	NA	NA	NA
B4E3S0	NA	NA	NA	NA	0.00856405034007824	0.00135684348426417	0.00358357608216223	NA	NA	NA	0.000928056430044776	NA	NA	0.008503401	NA	0.00625036333175863	0.00861553336498656	NA	NA	NA	NA	NA	NA	NA	NA	NA	NA	0.00335774224656552	NA	NA	NA	0.00424854936495683	0.00315632990630682
B4E3S1	NA	NA	NA	NA	NA	NA	NA	NA	NA	NA	NA	NA	NA	NA	NA	NA	NA	0.00878960126713939	NA	NA	NA	NA	NA	NA	NA	0.00112395114106985	NA	NA	NA	NA	0.00245907743305618	NA	NA
B4E3V2	NA	NA	NA	NA	NA	NA	NA	NA	NA	NA	NA	NA	NA	NA	NA	NA	NA	NA	NA	NA	NA	0.00987412476544114	NA	NA	NA	NA	NA	NA	NA	NA	NA	NA	NA
B5MBZ0	NA	NA	NA	NA	0.00322247934881131	NA	NA	0.00103654080531936	NA	NA	NA	NA	NA	0.002275313	NA	NA	NA	NA	NA	NA	NA	NA	NA	NA	NA	NA	NA	NA	NA	NA	NA	0.000947343950458127	0.00316710167606381
B5MBZ8	NA	NA	NA	NA	0.00172296857086576	NA	NA	NA	NA	NA	NA	NA	NA	NA	NA	NA	NA	NA	NA	0.00403732471467344	NA	NA	NA	0.00259351308466354	NA	NA	NA	NA	NA	NA	NA	NA	NA
B5MC47	NA	NA	NA	NA	NA	NA	NA	NA	NA	NA	NA	NA	NA	NA	0.00170145663660016	NA	NA	NA	NA	NA	NA	NA	NA	NA	NA	NA	NA	NA	NA	NA	NA	0.00262686312485716	NA
B5MC59	NA	NA	NA	NA	NA	NA	NA	NA	NA	NA	NA	NA	NA	0.006097561	NA	NA	NA	NA	NA	NA	NA	NA	NA	NA	NA	NA	NA	NA	NA	NA	NA	NA	NA
B5MCB4	NA	NA	NA	NA	NA	NA	NA	NA	0.00956702367591401	NA	NA	NA	NA	NA	NA	NA	NA	NA	NA	NA	NA	NA	NA	NA	NA	NA	NA	NA	NA	NA	NA	NA	NA
B5MCP9	NA	NA	NA	NA	NA	NA	NA	NA	NA	NA	NA	NA	NA	NA	NA	0.00935883275129373	NA	NA	NA	0.00669544323880603	NA	NA	NA	NA	NA	NA	NA	NA	NA	NA	0.00513433363600702	NA	NA
B5MCT7	NA	NA	NA	NA	0.00882417278423702	NA	NA	NA	NA	NA	NA	NA	0.0144910041293787	0.01018024	NA	NA	NA	NA	NA	NA	NA	NA	NA	NA	NA	NA	NA	NA	NA	NA	NA	NA	NA
B5MCW2	NA	0.0010938508187192	0.00432325687964879	NA	0.00425231020373672	NA	NA	NA	0.00161795230691327	NA	NA	NA	NA	NA	NA	NA	NA	NA	0.00128683929329068	0.00679101461276521	NA	0.00103719837784717	NA	NA	NA	NA	NA	NA	NA	NA	NA	NA	NA
B5MCX3	NA	NA	0.00398806277222395	NA	NA	NA	NA	NA	NA	NA	NA	NA	0.00161011111051248	0.002855659	NA	NA	NA	NA	NA	0.00344619020183036	NA	NA	NA	0.00885511062132611	NA	NA	NA	NA	NA	NA	NA	0.00129706453641522	NA
B5MD17	NA	NA	0.00609603885286237	NA	NA	NA	NA	NA	NA	NA	NA	NA	NA	NA	NA	NA	NA	NA	NA	0.00658468447459886	NA	0.00671709173090758	NA	NA	NA	NA	NA	NA	NA	NA	NA	NA	NA
B5MD38	NA	NA	NA	NA	NA	NA	NA	NA	NA	NA	NA	NA	NA	NA	0.00340291327320032	0.00607290826776817	NA	NA	NA	NA	NA	NA	NA	0.00523066124297025	NA	NA	NA	NA	NA	NA	NA	NA	NA
B5MDF5	NA	NA	0.0104503526118025	NA	0.0230158845218087	0.00542737473488078	NA	0.0139457094448554	NA	NA	NA	NA	0.0210957466150218	0.017006803	NA	NA	NA	NA	0.007143272229144	0.0150507070544468	NA	0.00767667610268418	NA	0.0161138927179543	NA	0.00339861580619481	NA	NA	NA	NA	NA	NA	NA
B5MEG9	NA	NA	NA	NA	0.00178540196081475	0.00131871786416954	0.00108840018459856	NA	0.00148512906680558	NA	NA	0.00206594755530294	0.0016315354025638	0.00186886	NA	NA	NA	NA	0.000361591666323288	NA	NA	NA	NA	NA	NA	NA	NA	NA	NA	NA	NA	NA	NA
B6E315	NA	NA	NA	NA	NA	NA	NA	NA	NA	NA	NA	NA	0.00580725665395591	NA	NA	NA	NA	NA	NA	NA	NA	NA	NA	NA	NA	NA	NA	NA	NA	NA	NA	NA	NA
B7UCU6	NA	NA	NA	NA	NA	NA	NA	NA	NA	NA	NA	NA	NA	NA	NA	NA	NA	NA	NA	NA	NA	NA	NA	NA	NA	NA	NA	NA	NA	0.0364551453137454	0.0252330170515807	NA	NA
B7WNR0	NA	NA	NA	0.0118668241421925	NA	NA	NA	NA	NA	NA	NA	NA	NA	NA	NA	NA	NA	NA	NA	NA	NA	NA	0.00724741764035689	NA	NA	NA	NA	NA	NA	NA	0.0050304764614084	NA	NA
B7Z1C7	NA	NA	NA	NA	NA	NA	NA	NA	NA	NA	NA	NA	NA	0.002725857	NA	NA	NA	NA	NA	NA	NA	NA	NA	NA	NA	NA	NA	NA	NA	NA	NA	NA	NA
B7Z1C9	NA	NA	0.00534796081752921	NA	0.00595766119818458	NA	NA	NA	NA	NA	NA	NA	NA	NA	NA	NA	NA	NA	NA	NA	NA	NA	NA	NA	NA	NA	0.00233627233035247	NA	NA	NA	NA	NA	NA
B7Z1D1	NA	NA	NA	NA	NA	NA	NA	NA	0.000778219185827944	NA	NA	NA	NA	NA	NA	NA	NA	NA	NA	NA	NA	NA	NA	NA	NA	NA	NA	NA	NA	NA	NA	NA	NA
B7Z1E1	NA	0.00313847546272517	NA	NA	NA	NA	NA	NA	NA	NA	NA	NA	NA	NA	NA	NA	NA	NA	NA	NA	NA	NA	NA	NA	NA	NA	NA	NA	NA	NA	NA	NA	NA
B7Z1G8	NA	NA	NA	NA	0.00396717059334346	NA	NA	NA	NA	NA	NA	NA	NA	NA	NA	NA	NA	NA	NA	NA	NA	NA	NA	NA	NA	NA	NA	NA	NA	NA	NA	NA	NA
B7Z2C8	NA	NA	NA	NA	NA	NA	NA	NA	NA	NA	NA	0.00217284366391392	NA	NA	NA	NA	NA	NA	NA	NA	NA	NA	NA	NA	NA	NA	NA	NA	NA	NA	NA	NA	NA
B7Z2F4	NA	NA	NA	0.00143252496378114	NA	NA	NA	NA	NA	NA	NA	NA	NA	NA	NA	NA	NA	NA	NA	NA	NA	0.0010595974067008	NA	NA	NA	NA	NA	NA	NA	NA	NA	NA	NA
B7Z2V6	NA	0.00417406643572747	NA	NA	NA	NA	NA	NA	NA	NA	NA	0.007301340335319	NA	NA	NA	NA	NA	NA	NA	NA	NA	NA	NA	NA	NA	NA	NA	NA	NA	NA	NA	NA	NA
B7Z2Z8	NA	NA	NA	NA	NA	NA	NA	NA	0.00147021112995318	NA	NA	NA	NA	NA	NA	NA	NA	NA	NA	NA	NA	NA	NA	NA	NA	NA	NA	NA	NA	NA	NA	NA	NA
B7Z3V1	NA	NA	NA	NA	NA	NA	NA	NA	NA	NA	NA	NA	NA	NA	NA	NA	NA	NA	NA	NA	NA	NA	0.00172727001770749	NA	NA	NA	NA	NA	NA	NA	NA	NA	0.00201183957719605
B7Z3Y2	NA	NA	NA	NA	NA	NA	NA	NA	NA	NA	NA	NA	NA	NA	NA	NA	NA	NA	NA	NA	NA	NA	0.00311859385041234	NA	NA	NA	NA	NA	NA	NA	NA	NA	NA
B7Z4C7	0.00235554465054573	NA	NA	NA	NA	NA	0.00609000728114369	NA	NA	NA	NA	NA	NA	NA	NA	NA	NA	0.00513512588831653	NA	NA	NA	NA	NA	NA	NA	NA	NA	NA	0.00767889807030366	NA	NA	NA	NA
B7Z4C8	NA	NA	0.0223208807543002	0.0195594711248091	0.0214862957378409	0.0204570283991981	NA	0.029202554775607	0.013541018058204	NA	NA	NA	0.0129211449696757	0.016666667	0.024893620368811	0.0181741329115479	0.0311749776701674	NA	NA	0.0152460766956668	NA	0.0217013728504432	0.0228796831019104	0.0127547652048809	0.0189187227082328	NA	NA	0.0303746490957689	NA	NA	0.0110783117705624	0.00480412891651386	0.0175479775738941
B7Z4E3	NA	0.0427007021962282	NA	NA	NA	NA	NA	NA	NA	NA	NA	0.0240944219138788	NA	NA	NA	NA	NA	NA	NA	NA	NA	NA	NA	NA	NA	NA	NA	NA	NA	NA	NA	NA	NA
B7Z4F6	NA	NA	NA	NA	NA	0.00481112104198831	NA	NA	NA	NA	NA	NA	NA	NA	NA	NA	NA	NA	NA	NA	NA	NA	NA	NA	NA	NA	NA	NA	NA	NA	NA	NA	NA
B7Z4L4	0.00187360477947246	0.00645972800100259	0.00867418177746526	NA	0.00275021707563828	0.00438868754377868	NA	0.00148362360276164	0.00708179696748302	NA	NA	0.00872384249186984	0.00426885789802514	0.009578544	NA	0.00394213177341049	NA	NA	0.00198143681448122	0.00476792126324855	NA	0.00709077826477355	0.00234432268870328	0.00691823087436302	0.0039577103416546	NA	0.00239982584982978	0.00208025642716036	NA	NA	NA	0.00287143337538759	0.00177770298668125
B7Z551	NA	NA	0.00156436035723402	NA	NA	NA	NA	NA	NA	NA	NA	NA	NA	NA	NA	NA	NA	NA	NA	NA	NA	NA	NA	NA	NA	NA	NA	NA	NA	NA	NA	NA	NA
B7Z553	NA	0.0421335196290535	0.0992897299948999	0.0232668221467336	0.0586259606091223	0.134708861668935	NA	0.100243017804252	0.0852361384794348	NA	NA	0.0909446330306051	NA	NA	NA	NA	0.0231774750614286	0.0219352302584347	0.0657717970688278	0.0723024170445072	NA	NA	NA	NA	0.0771587135913793	NA	NA	0.0451649190812747	NA	NA	NA	0.046261980678639	NA
B7Z596	NA	NA	NA	NA	NA	NA	NA	NA	NA	NA	NA	0.00312914585799386	0.00892733690039108	NA	NA	NA	NA	NA	NA	NA	NA	0.00957490831632043	0.00185414596891747	NA	NA	NA	NA	NA	NA	NA	NA	NA	NA
B7Z5N5	NA	NA	NA	NA	0.0064012645776863	NA	NA	0.00154427046404877	NA	NA	NA	0.00367542086163776	NA	NA	NA	NA	NA	NA	NA	NA	NA	NA	NA	NA	NA	NA	NA	NA	NA	NA	NA	NA	NA
B7Z5V6	NA	NA	NA	NA	NA	NA	NA	0.00305062377022717	0.00392931362552701	NA	NA	0.00363029767113099	0.00230734746368375	0.006138393	NA	NA	NA	NA	NA	NA	NA	NA	NA	NA	NA	NA	0.00266307196143945	NA	NA	NA	NA	NA	NA
B7Z638	NA	NA	NA	NA	NA	NA	NA	NA	NA	NA	NA	NA	NA	0.003144654	NA	NA	NA	NA	NA	NA	NA	NA	NA	NA	NA	NA	NA	NA	NA	NA	NA	NA	NA
B7Z645	NA	0.00474979994239848	0.00608027332607554	0.00219200930045996	0.00680394408052359	0.00286574745435745	0.00340594186615142	NA	0.00392555003487382	NA	0.00352821419981121	0.00299174006685722	0.00413731237270106	0.00152658	0.0024539925254112	0.00301741652738598	NA	0.00127640320660986	0.00664774632833496	0.00726847877198216	NA	0.00242678677726621	0.00365777100789167	0.00170168259736491	0.00424040358613936	NA	0.00394639742663079	0.00323562560292584	NA	NA	NA	0.00370394916918644	0.00271099684589772
B7Z6G1	NA	NA	NA	NA	NA	NA	NA	NA	NA	NA	NA	NA	0.039962304221744	NA	NA	NA	0.0121860947175813	NA	NA	NA	NA	NA	NA	NA	NA	NA	NA	NA	NA	NA	NA	NA	0.0337037994866665
B7Z6I1	NA	NA	NA	NA	NA	NA	NA	NA	NA	NA	NA	NA	NA	NA	NA	NA	NA	NA	NA	NA	NA	NA	NA	NA	NA	NA	NA	NA	NA	NA	0.00963757154785283	NA	0.0179552104169804
B7Z6P1	NA	NA	NA	NA	0.0106824810519646	0.0108752623251041	NA	0.0202630199134474	NA	NA	0.0104075166851712	NA	0.0115431782507632	0.014468776	NA	NA	NA	NA	NA	NA	0.0101848564682609	NA	NA	NA	NA	NA	0.00834358406685262	NA	NA	NA	NA	NA	0.00745935590470791
B7Z6Z4	NA	0.00729233978321954	0.00944770545905968	0.0113603822512495	0.0143998831506106	0.0103927159725271	NA	0.00984407628830681	0.00739635428319831	NA	0.0149034925094351	0.0115470143671686	0.0112240631829098	0.015493697	0.00383999371853941	0.00933013038306322	NA	NA	0.0071934178936954	0.0088183127310438	0	0.00578196697676423	0.00749838350332256	0.00895742891400149	0.00305091801641837	0.00314871765862114	0.00495059332170092	0.012759418760032	0.00930286724070527	0.00293194224457088	0.00705970802941942	0.0097841590205632	0.0143227595645825
B7Z766	NA	NA	NA	NA	NA	NA	NA	NA	NA	NA	NA	NA	NA	NA	NA	NA	NA	NA	NA	0.00195676951075792	NA	NA	NA	NA	NA	NA	NA	NA	NA	NA	NA	NA	NA
B7Z792	NA	NA	NA	NA	NA	NA	NA	NA	NA	NA	NA	NA	NA	NA	NA	0.000862119007824567	NA	NA	NA	NA	NA	NA	NA	NA	NA	NA	NA	NA	NA	NA	NA	NA	NA
B7Z7C7	NA	NA	NA	NA	NA	NA	NA	NA	NA	NA	NA	NA	NA	0.008130081	NA	NA	NA	NA	NA	NA	NA	NA	NA	NA	NA	NA	NA	NA	NA	NA	NA	NA	NA
B7Z7P8	NA	NA	0.00121056079800091	NA	0.0022321192674844	NA	NA	NA	NA	NA	NA	NA	NA	NA	NA	NA	NA	NA	NA	NA	NA	NA	NA	NA	NA	NA	NA	NA	NA	NA	NA	NA	NA
B7Z7V0	NA	NA	NA	NA	NA	NA	NA	NA	NA	NA	NA	NA	NA	NA	NA	NA	NA	NA	NA	NA	NA	NA	NA	0.00245465552245143	NA	NA	NA	NA	NA	NA	NA	NA	NA
B7Z8B3	NA	NA	NA	NA	0.010152543144755	NA	NA	NA	NA	NA	NA	NA	0.0055574816184677	0.005376344	NA	NA	NA	NA	NA	NA	NA	NA	NA	NA	NA	NA	NA	NA	NA	NA	NA	NA	NA
B7Z8F0	NA	NA	NA	NA	NA	NA	NA	NA	0.00730428361812177	NA	NA	NA	NA	NA	NA	NA	NA	NA	NA	NA	NA	NA	NA	NA	NA	NA	NA	NA	NA	NA	NA	NA	NA
B7Z8Q4	NA	NA	NA	NA	NA	NA	NA	NA	NA	NA	NA	NA	NA	NA	NA	NA	NA	NA	0.00546906752151591	NA	NA	NA	NA	NA	NA	NA	NA	NA	NA	NA	NA	NA	NA
B7Z8Y3	NA	NA	NA	NA	NA	NA	NA	0.000968064692360276	NA	NA	NA	NA	0.00172281967385396	NA	NA	NA	NA	NA	NA	NA	NA	NA	NA	NA	NA	NA	NA	NA	NA	NA	NA	NA	NA
B7Z938	NA	NA	NA	NA	NA	0.00175600844270232	NA	NA	NA	NA	NA	NA	NA	NA	NA	NA	NA	NA	NA	NA	NA	NA	NA	NA	NA	NA	NA	NA	NA	NA	NA	NA	NA
B7Z9C2	NA	NA	0.00289849425044259	NA	0.00890741982199974	NA	NA	0.0042977343629499	0.00664276390786089	NA	NA	NA	0.007801446214463	0.011320755	NA	NA	NA	NA	0.0092458199327963	0.0100882336517187	NA	NA	NA	0.00715091999972969	NA	NA	0.00675314977041686	NA	NA	NA	NA	0.00314232326932705	NA
B7ZAP6	NA	NA	NA	NA	NA	NA	NA	NA	NA	NA	NA	NA	NA	NA	NA	NA	NA	NA	NA	NA	NA	0.0141832323095787	NA	NA	NA	NA	NA	NA	NA	NA	NA	NA	NA
B7ZAR1	NA	0.00180737921446663	0.00489871909005875	NA	0.00300625213631922	0.000528710848266874	NA	0.00216933229685137	NA	NA	NA	0.00245494898918978	0.00202080195068664	0.000898455	0.00244243831743597	NA	NA	NA	0.00194842289565605	0.00753507836862993	NA	NA	NA	0.00282553706722307	NA	NA	0.00103769781440601	NA	NA	NA	NA	0.00255222682154617	0.00169111495807815
B7ZAY6	NA	NA	NA	NA	NA	NA	NA	NA	NA	NA	NA	NA	NA	NA	NA	NA	NA	NA	NA	NA	NA	0.00591855602676243	NA	NA	NA	NA	NA	NA	NA	NA	NA	NA	NA
B7ZAY8	NA	NA	NA	NA	0.00188084977688672	NA	NA	NA	NA	NA	NA	NA	NA	NA	NA	NA	NA	NA	NA	NA	NA	NA	NA	NA	NA	NA	NA	NA	NA	NA	NA	NA	NA
B7ZB78	NA	NA	0.00867910581623303	NA	NA	NA	NA	NA	NA	NA	NA	NA	0.00438004900210139	NA	NA	NA	NA	NA	NA	NA	NA	NA	NA	NA	NA	NA	NA	NA	NA	NA	NA	NA	NA
B7ZBH1	NA	NA	NA	NA	0.0136838630741746	NA	NA	0.0330115836593818	NA	NA	NA	NA	0.0599241500746481	0.072463768	NA	NA	NA	NA	NA	NA	NA	NA	NA	NA	NA	NA	NA	NA	NA	NA	NA	NA	NA
B7ZBK6	NA	NA	NA	NA	0.00575723494723135	NA	NA	NA	NA	NA	NA	NA	NA	NA	NA	NA	NA	0.007222575657905	NA	NA	NA	NA	NA	NA	NA	0.0121852794771487	NA	0.0120387328311875	NA	NA	NA	0.0114244522917628	NA
B7ZC06	NA	NA	NA	NA	NA	NA	NA	NA	NA	NA	NA	0.000848395565403788	NA	NA	NA	NA	NA	NA	NA	NA	NA	NA	NA	NA	NA	NA	NA	NA	NA	NA	NA	NA	NA
B7ZKJ8	NA	NA	0.00201843087896198	0.00239674798867788	0.00141081861647833	NA	NA	0.000878328512077393	0.00489068219420537	NA	NA	NA	NA	NA	NA	NA	NA	NA	0.00101226933481722	NA	NA	0.000543928858007595	NA	NA	0.00252898087194109	NA	NA	0.000581562215557225	NA	NA	NA	NA	NA
B8YAC7	NA	NA	NA	NA	NA	NA	NA	0.00213376947231283	NA	NA	NA	NA	NA	NA	NA	NA	NA	NA	NA	0.0120899126593007	NA	NA	NA	NA	NA	NA	NA	NA	NA	NA	NA	NA	NA
B8ZZ51	NA	NA	0.027362372389396	NA	0.0312326328430781	0.0152256503231351	NA	0.010432668732459	0.00671882611016844	NA	NA	0.0165534202645192	0.0144664219094968	0.019083969	0.00823453116881794	NA	NA	NA	0.0160314665761324	0.00844448102181029	NA	NA	0.00778458175175907	0.00663006675438721	NA	NA	0.00683047593331764	NA	NA	NA	NA	0.019069823645219	NA
B8ZZ54	NA	NA	0.108950481037293	NA	0.0401781496472787	NA	NA	0.0290782889805372	0.0187269405606257	NA	NA	NA	0.0219934385101778	NA	NA	0.0558543097975822	NA	NA	0.0446834476280536	NA	NA	NA	NA	0.110877294415418	NA	NA	NA	NA	NA	NA	NA	NA	NA
B8ZZA1	NA	NA	0.0138396561615763	NA	0.0340247396981985	0.0161721098465176	0.0198307327412273	0.01983669060077	0.00892060321674186	NA	NA	0.0109890099578755	0.0139688058754994	0.043018018	0.0145773458343911	0.0283800278455378	NA	NA	0.0141900144477994	0.0448470403548661	NA	0.0152496140863469	NA	NA	0.0265884754499896	NA	NA	NA	NA	NA	NA	NA	NA
B8ZZA8	NA	NA	0.0121199356219312	NA	NA	NA	NA	NA	NA	NA	NA	NA	NA	NA	NA	NA	NA	NA	NA	NA	NA	NA	NA	NA	NA	NA	NA	NA	NA	NA	NA	NA	NA
B8ZZB2	NA	NA	NA	NA	NA	NA	NA	NA	NA	NA	NA	NA	NA	0.002512563	NA	NA	NA	NA	NA	NA	NA	NA	NA	NA	NA	NA	NA	NA	NA	NA	NA	NA	NA
B8ZZJ2	NA	NA	NA	0.0126201733768468	0.0285062640307532	0.0421713765135791	NA	0.0472574232258194	NA	NA	NA	NA	NA	NA	0.0555225355577726	NA	NA	NA	NA	NA	0.148108182817344	NA	0.0187459592681965	NA	0.0162756664018107	NA	NA	0.0435518861864308	NA	NA	NA	NA	NA
B8ZZK4	NA	NA	NA	NA	NA	NA	NA	NA	NA	NA	NA	NA	NA	NA	0.0204820930225742	NA	NA	NA	0.0398757358456592	NA	NA	NA	NA	NA	NA	NA	0.0320917078454381	NA	NA	NA	NA	0.0158110567508803	NA
B8ZZL6	NA	NA	0.00585219754454016	0.00484329791214195	NA	0.00455899506451653	NA	NA	NA	NA	NA	0.00877725368170943	0.00590680942433507	0.02	NA	NA	NA	NA	NA	0.00632129736110938	NA	NA	NA	NA	NA	NA	0.00511309923971452	NA	NA	NA	NA	NA	NA
B8ZZL8	NA	NA	0.0101399456321431	NA	NA	NA	NA	NA	NA	NA	NA	NA	NA	NA	NA	NA	NA	NA	NA	NA	NA	NA	NA	0.00938115709704746	NA	NA	NA	NA	NA	NA	NA	NA	NA
B8ZZP4	NA	NA	NA	0.00959521209638296	NA	NA	NA	NA	NA	NA	NA	0.0102287638359251	0.00975180725123296	0.018867925	NA	NA	NA	NA	NA	NA	NA	NA	0.0048102837376073	NA	NA	NA	NA	NA	NA	NA	NA	NA	NA
B8ZZQ6	NA	0.0467810484705707	0.0676315250000073	NA	NA	0.11289963631301	0.0861410434103061	0.219184458888283	0.243568004087125	NA	NA	0.0995599703883524	0.214539765729275	0.305031447	0.0407065491053889	0.0297187086519455	NA	NA	0.272091286258816	0.170456358649793	NA	0.0745216965132873	NA	NA	0.0897152022832204	NA	0.092855807106251	0.0186259643941145	NA	NA	NA	0.0602278611354564	0.0758710141050984
B8ZZT4	NA	NA	NA	NA	NA	NA	NA	NA	NA	NA	NA	NA	0.0104413291640115	NA	NA	NA	NA	NA	NA	NA	NA	NA	NA	NA	NA	NA	NA	NA	NA	NA	NA	NA	NA
B9A025	NA	NA	0.00237618257330425	NA	NA	NA	NA	NA	NA	NA	NA	NA	NA	NA	NA	NA	NA	NA	NA	NA	NA	NA	NA	NA	NA	NA	NA	NA	NA	NA	NA	NA	NA
B9A067	NA	NA	0.000506495967760064	NA	NA	NA	NA	NA	NA	NA	NA	NA	NA	NA	NA	NA	NA	NA	NA	NA	NA	0.00153476624525607	NA	NA	NA	NA	NA	NA	NA	NA	NA	NA	NA
B9EJB8	NA	0.00902136613014195	0.00587489953442478	NA	0.00745269464361639	0.00642794348630512	NA	NA	0.00587626853576083	NA	NA	NA	0.00320145038161301	NA	NA	NA	NA	NA	NA	NA	NA	NA	0.00443587960242155	NA	NA	NA	NA	NA	NA	NA	NA	NA	NA
B9VP19	NA	NA	NA	NA	NA	NA	NA	NA	NA	NA	NA	NA	NA	0.010869565	NA	NA	NA	NA	NA	NA	NA	NA	NA	NA	NA	NA	NA	NA	NA	NA	NA	NA	NA
B9ZVP7	NA	0.0361034798088942	0.0489608173884519	0.0267655919049347	0.0706759504415456	0.0454899705207009	0.0277255581056018	0.0575444030054566	0.00386037812890674	NA	NA	0.0497740039345844	0.0405121609616996	0.04371345	0.037849948903219	0.00921106186259808	0.0251815422749364	NA	0.0260980079106539	0.0633978042278478	NA	NA	0.0401053897686879	0.00831137627391842	0.0172591861808572	NA	0.0150440225163604	0.0346377571865849	NA	NA	NA	0.0328703542544458	0.040700037960928
B9ZVT1	NA	NA	NA	NA	NA	NA	NA	NA	NA	NA	NA	0.00104121190153042	NA	0.000320102	NA	NA	NA	NA	NA	NA	NA	NA	NA	NA	NA	NA	NA	NA	NA	NA	NA	NA	NA
C1KH65	NA	NA	NA	NA	NA	NA	NA	NA	NA	NA	NA	NA	NA	NA	NA	NA	NA	NA	NA	NA	NA	NA	NA	NA	NA	NA	NA	NA	NA	NA	NA	NA	0.021090019982795
C6GLT6	NA	NA	NA	NA	NA	NA	NA	NA	NA	NA	NA	0.0394272358590744	NA	NA	NA	NA	NA	NA	NA	NA	NA	NA	NA	NA	NA	NA	NA	NA	NA	NA	NA	NA	NA
C7FFS5	NA	NA	NA	NA	NA	NA	NA	NA	NA	NA	NA	NA	NA	NA	NA	NA	NA	NA	NA	NA	NA	NA	NA	NA	NA	NA	NA	NA	NA	NA	NA	NA	0.037765848894994
C8C504	NA	0.0289944347990252	NA	NA	NA	NA	NA	0.017315015556209	NA	NA	NA	NA	NA	NA	0.0542824252528343	NA	NA	NA	0.0300759751168807	NA	NA	NA	NA	0.0852859751277988	NA	NA	0.0260983477108259	0.0708716399031509	NA	0.0325070877769439	0.0301564977050806	0.049819749947111	NA
C9IY88	NA	NA	NA	NA	NA	NA	NA	NA	NA	NA	NA	NA	NA	0.011363636	NA	NA	NA	NA	NA	NA	NA	NA	NA	NA	NA	NA	NA	NA	NA	NA	NA	NA	NA
C9IYT0	NA	NA	0.00347332456985427	NA	NA	NA	NA	0.00117715755471299	NA	NA	NA	NA	NA	NA	NA	NA	NA	NA	NA	NA	NA	NA	NA	NA	NA	NA	NA	NA	NA	NA	NA	0.00161378959763289	NA
C9IZ01	NA	NA	NA	NA	NA	NA	NA	0.0016357623720137	NA	NA	NA	NA	NA	NA	NA	NA	NA	NA	NA	NA	NA	NA	NA	NA	NA	NA	NA	NA	NA	NA	NA	NA	NA
C9IZA5	NA	NA	NA	NA	NA	NA	NA	NA	NA	NA	0.0162409854794194	0.0258154525152626	NA	NA	NA	NA	NA	NA	NA	NA	NA	NA	0.00809349356416535	NA	NA	NA	NA	0.0156694618429536	NA	NA	NA	NA	0.0147295377068434
C9IZG3	NA	NA	NA	NA	0.00221640045017343	NA	NA	NA	NA	NA	NA	NA	NA	NA	NA	NA	NA	NA	NA	NA	NA	NA	NA	NA	NA	NA	0.00315067740512783	NA	NA	NA	NA	NA	NA
C9IZG4	NA	NA	NA	NA	NA	NA	NA	NA	NA	NA	NA	0.00570657378237903	NA	NA	NA	NA	NA	NA	NA	NA	NA	NA	NA	NA	NA	NA	NA	NA	NA	NA	NA	NA	NA
C9IZL7	NA	0.0212376506676407	0.00822411050103434	NA	0.0209819226250518	NA	NA	NA	NA	NA	NA	0.016428014941281	NA	0.024242424	NA	0.0254560247474994	NA	NA	0.00636400618687485	0.021023101531382	NA	0.0152783302981076	0.0231768225719081	0.00502460435980196	NA	NA	0.00987757754798032	0.011965770646508	NA	NA	NA	0.00958884723132986	NA
C9IZQ1	NA	NA	NA	NA	NA	NA	NA	NA	NA	NA	NA	NA	NA	NA	NA	NA	NA	NA	NA	NA	NA	NA	NA	NA	NA	NA	0.00401252168444982	NA	NA	NA	NA	NA	NA
C9J013	NA	NA	NA	NA	NA	NA	NA	0.0401964577606722	NA	NA	NA	NA	NA	NA	NA	NA	NA	NA	NA	NA	NA	NA	NA	NA	NA	NA	NA	NA	NA	NA	NA	NA	NA
C9J035	NA	NA	NA	NA	NA	NA	NA	NA	NA	NA	NA	NA	NA	0.02	NA	NA	NA	NA	NA	NA	NA	NA	NA	NA	NA	NA	NA	NA	NA	NA	NA	NA	NA
C9J066	NA	NA	NA	NA	NA	NA	NA	NA	NA	NA	NA	NA	NA	NA	NA	NA	NA	NA	NA	0.000420219125306738	NA	NA	NA	NA	NA	NA	NA	NA	NA	NA	NA	NA	NA
C9J0J7	NA	NA	0.0196948943615036	NA	0.0311270284125291	NA	NA	0.0200246090410517	NA	NA	NA	NA	NA	0.032967033	NA	NA	NA	NA	NA	NA	NA	NA	NA	NA	NA	NA	NA	NA	NA	NA	NA	0.00457536027807345	NA
C9J0K6	NA	NA	0.0137652486922265	NA	NA	NA	NA	NA	NA	NA	NA	NA	NA	NA	NA	NA	NA	NA	NA	NA	NA	0.00364022981864099	NA	0.0056034756813695	NA	NA	NA	NA	NA	NA	NA	NA	NA
C9J0S9	NA	0.0313486794214783	NA	0.0160747382603481	NA	0.0103166905165572	NA	NA	0.0113814590033777	NA	NA	NA	0.0267334034211805	0.031609195	NA	NA	0.017468737042141	0.0153168408483231	NA	NA	NA	NA	NA	NA	0.0127212097746445	0.0172274637093785	0.011570589941442	0.00567342536312232	NA	NA	NA	NA	NA
C9J164	NA	NA	0.0011717788720321	NA	NA	NA	NA	NA	NA	NA	NA	NA	NA	NA	NA	NA	NA	NA	NA	NA	NA	NA	NA	NA	NA	NA	NA	NA	NA	NA	NA	NA	NA
C9J1B1	NA	NA	NA	NA	0.0218128898577271	NA	NA	NA	0.0174290334056584	NA	NA	0.0107351384764807	NA	0.014851485	NA	NA	NA	NA	NA	NA	NA	NA	NA	NA	NA	NA	NA	NA	NA	NA	NA	NA	NA
C9J1E1	NA	NA	NA	NA	NA	NA	NA	NA	NA	NA	NA	NA	NA	NA	NA	NA	NA	NA	NA	NA	NA	NA	0.00809349356416535	NA	NA	NA	NA	NA	NA	NA	NA	NA	NA
C9J1G2	NA	NA	NA	NA	NA	NA	NA	NA	NA	NA	NA	NA	NA	0.008196721	NA	NA	NA	NA	NA	NA	NA	NA	NA	NA	NA	NA	NA	NA	NA	NA	NA	NA	NA
C9J1H7	NA	NA	NA	NA	NA	NA	0.00798160065134196	0.00690242243545026	NA	NA	NA	NA	NA	NA	NA	NA	NA	NA	NA	NA	NA	NA	NA	NA	NA	NA	NA	NA	NA	NA	NA	NA	NA
C9J1K7	NA	NA	NA	0.0175360774549572	NA	NA	NA	NA	NA	NA	NA	NA	NA	NA	NA	NA	NA	NA	NA	NA	NA	NA	NA	NA	NA	NA	NA	NA	NA	NA	NA	NA	NA
C9J1Z8	NA	NA	NA	NA	NA	NA	NA	NA	NA	NA	NA	NA	NA	NA	NA	0.00233346872517524	NA	NA	NA	NA	NA	NA	NA	0.00947496876276763	NA	NA	NA	NA	NA	NA	NA	NA	NA
C9J2C0	NA	0.00587496850264103	0.012434123706235	0.00152661619194555	0.0184902946346515	0.00603541243522853	0.00320490783318946	0.0038291536959394	0.00412181565437387	0.00306535396360979	NA	NA	0.00612337298248483	0.00520333	0.00854896182491462	0.0035304647966249	NA	NA	0.00268987729024786	0.00451629666126806	NA	NA	0.00710221521951548	0.00394411113698973	0.0025200728020598	NA	0.0109969180034495	0.00553172610742085	NA	NA	NA	0.00859912887981643	0.00217125583064996
C9J2Z7	NA	0.00298722340616725	0.00231355674746203	NA	0.00236994595165978	0.00120154223695549	NA	NA	0.00265110282968909	NA	NA	0.0136075428459847	0.00259460725757479	0.004607717	NA	NA	NA	NA	0.00395354278663801	NA	NA	NA	NA	NA	NA	NA	NA	NA	NA	NA	NA	NA	0.00279506267686131
C9J3C1	NA	NA	NA	NA	NA	NA	NA	NA	NA	NA	NA	NA	NA	NA	NA	NA	NA	NA	NA	NA	NA	NA	NA	0.00509406914578931	NA	NA	NA	NA	NA	NA	NA	NA	NA
C9J3E3	NA	NA	NA	NA	NA	NA	NA	NA	NA	NA	NA	NA	NA	NA	NA	NA	NA	NA	NA	NA	NA	0.00335854530121809	NA	NA	NA	NA	NA	NA	NA	NA	NA	NA	NA
C9J3N8	NA	0.0469074837608312	0.0645850596977088	NA	0.039341105630112	0.037734923241149	0.129798076628234	0.100551499249101	0.0257706316128283	NA	0.0811171375563433	0.0598290548174605	0.0349220136550569	NA	0.0728867270145082	0.0354750350694375	0.118661513096293	NA	NA	0.0610418040363294	NA	0.0609984540884449	0.0137808137518741	0.0490820455805073	0.0199413563415488	NA	0.0846425173286047	0.0844880439945265	NA	NA	0.0389237969969713	0.0450116564714087	0.0407550382015807
C9J3R0	NA	NA	NA	NA	0.00327842523312937	0.00226654565587732	NA	0.00345121121772513	NA	NA	NA	NA	NA	NA	NA	NA	NA	NA	NA	NA	NA	NA	NA	NA	NA	NA	NA	NA	NA	NA	NA	NA	NA
C9J4G9	NA	NA	0.00245595855580312	NA	0.00679270920503205	NA	NA	0.00327740875511754	NA	NA	NA	0.00780035292518511	NA	NA	NA	NA	NA	NA	NA	NA	NA	NA	NA	NA	NA	NA	NA	NA	NA	NA	NA	NA	NA
C9J4L5	NA	NA	NA	NA	0.0116566237854939	NA	NA	0.0112483914758717	NA	NA	NA	0.013385790072627	NA	NA	NA	NA	NA	NA	NA	NA	NA	NA	NA	NA	NA	NA	NA	NA	NA	NA	NA	NA	NA
C9J4P8	NA	NA	NA	NA	NA	0.00433600083610067	NA	NA	NA	NA	NA	NA	NA	NA	NA	NA	NA	NA	NA	NA	NA	NA	NA	NA	NA	NA	NA	NA	NA	NA	NA	NA	NA
C9J4S4	NA	0.0101199823471771	NA	NA	0.0192691125570361	NA	NA	0.0278914198008305	NA	NA	NA	NA	0.0158218097028434	0.010204082	NA	NA	NA	NA	0.0107149088687465	0.0112880308439486	NA	NA	NA	NA	NA	NA	NA	NA	NA	NA	NA	NA	0.0094689887909596
C9J4W5	NA	NA	0.00556594887405157	NA	0.022519728664369	NA	NA	0.0121482625023832	NA	NA	NA	NA	NA	0.011594203	0.00312673523301341	NA	NA	NA	0.00608730985481293	0.010274016729905	NA	NA	0.00842427150321107	0.00823910310718978	NA	NA	0.00466848140876977	0.00343365608774877	NA	NA	NA	NA	NA
C9J4Z3	NA	NA	NA	NA	0.0138850956604223	NA	NA	0.00669940947492542	NA	NA	NA	0.0159448378080156	0.0304026943503228	NA	0.0158635812797283	NA	NA	NA	NA	0.0244020663194625	NA	NA	NA	NA	NA	NA	NA	NA	NA	NA	NA	NA	NA
C9J544	NA	NA	NA	NA	NA	NA	NA	NA	NA	NA	NA	NA	NA	NA	NA	NA	NA	NA	NA	0	NA	NA	NA	NA	NA	NA	NA	0	NA	NA	NA	NA	NA
C9J592	NA	0.0132234427936813	0.0360722933891738	NA	0.0188837305513839	NA	NA	0.0111359073697779	NA	NA	0.00545697135027771	0.00722832700786324	0.0172281936374648	0.026666667	NA	NA	NA	NA	NA	0.0184371167501222	NA	0.0150462849807056	0.00679853487943735	0.0184235499509384	NA	NA	0.0149132056684379	NA	NA	NA	NA	0.0166543129110755	NA
C9J5S7	NA	NA	0.0324450332080245	0.0147100157346074	0.0280914998845495	0.0230775566392863	0.0130608001080403	NA	0.0442507797333185	0.00439536306420516	NA	0.0224018387534285	0.0720451722653712	0.037419651	NA	0.0332663965496064	NA	NA	0.0412214037581694	0.0350457586638263	NA	0.0264242615173514	0.037925709570415	0.0156611057532098	0.00858204731269662	0.00825779286042034	0.0295799112635762	0.0190364539294656	NA	0.0346017595580935	0.0555441507744819	0.0298217722834856	0.0345109417056681
C9J5V9	NA	NA	NA	NA	0.0200281988693676	0.00846177103367967	NA	0.00644226051456438	0.00933509636265924	NA	0.00992176549610808	0.0120472109569394	0.0187943924952208	0.018181818	NA	NA	NA	NA	0.0111370113520615	0.00446960392654757	NA	0.00341961027418178	NA	NA	NA	NA	0.0108459674334849	0.0104700498092825	NA	NA	NA	NA	0.00421800436774335
C9J5W6	NA	NA	NA	NA	0.0246309533446769	0.0104064010492527	0.0137422331205095	0.00726254796772655	0.0267876671727254	NA	0.0328604566502214	0.0188565039179488	NA	0.021014493	NA	0.00913096530724991	0.0308361193824243	NA	0.00913096530724991	NA	NA	NA	NA	NA	NA	NA	NA	0.00429206986289194	NA	NA	NA	0.0217230172387886	0.00806922477868028
C9J6B6	NA	NA	NA	NA	NA	NA	NA	0.00250002319576164	NA	NA	NA	NA	NA	NA	NA	NA	NA	NA	NA	NA	NA	NA	NA	NA	NA	NA	NA	NA	NA	NA	NA	NA	NA
C9J6D1	NA	NA	NA	NA	NA	NA	NA	0.0102373000663049	NA	NA	NA	NA	NA	NA	NA	NA	NA	NA	NA	NA	NA	NA	NA	NA	NA	NA	NA	NA	NA	NA	NA	NA	NA
C9J6I8	NA	NA	NA	NA	NA	NA	NA	NA	NA	NA	NA	NA	NA	NA	0	NA	NA	NA	NA	NA	NA	NA	NA	NA	NA	NA	NA	NA	NA	NA	NA	NA	NA
C9J6K0	NA	NA	NA	NA	NA	NA	NA	NA	NA	0.00405983967771402	NA	NA	NA	NA	NA	0.0120235999320993	NA	NA	NA	NA	NA	NA	NA	NA	NA	NA	NA	NA	NA	NA	NA	NA	NA
C9J6P4	NA	NA	NA	NA	NA	NA	NA	NA	NA	NA	0.00127631895996354	NA	NA	0.001386001	NA	NA	NA	NA	NA	NA	NA	NA	NA	NA	NA	NA	NA	NA	NA	NA	NA	NA	NA
C9J719	NA	NA	NA	NA	NA	NA	NA	NA	NA	NA	NA	NA	NA	NA	NA	NA	NA	NA	NA	0.0283647948299992	NA	NA	NA	NA	NA	NA	NA	NA	NA	NA	NA	NA	NA
C9J792	NA	NA	0.00825914921533589	NA	0.0203050862895099	NA	NA	0.0293909588426944	NA	NA	NA	0.0080152814353559	0.0166724448554031	0.032258065	NA	NA	NA	NA	NA	0.02676355560927	NA	NA	NA	NA	NA	NA	NA	NA	NA	NA	NA	NA	NA
C9J7B1	NA	NA	0.015755915284376	NA	NA	NA	NA	NA	NA	NA	NA	NA	0.0318058955485152	NA	NA	NA	NA	NA	NA	0.0170188762342633	NA	0.0347221972377919	NA	NA	NA	NA	NA	NA	NA	NA	NA	0.0256220200553583	NA
C9J7B7	NA	NA	NA	NA	NA	NA	NA	NA	NA	NA	NA	NA	NA	0.006944444	NA	NA	NA	NA	NA	NA	NA	NA	NA	NA	NA	NA	NA	NA	NA	NA	NA	NA	NA
C9J7H8	NA	NA	NA	0.00249287340186368	NA	NA	NA	NA	NA	NA	NA	NA	NA	NA	NA	NA	NA	NA	NA	NA	NA	NA	NA	0.00812803657585574	NA	NA	NA	NA	NA	NA	NA	NA	0.00739184489563135
C9J7S3	NA	NA	NA	NA	NA	NA	NA	NA	NA	NA	NA	NA	NA	NA	NA	NA	NA	NA	NA	0.00632129736110938	NA	NA	0.0058273156109463	NA	NA	NA	NA	NA	NA	NA	NA	NA	NA
C9J813	NA	0.000960308588951531	0.00251013322359382	0.00110794429921303	0.00201705340442121	0.00203219440144922	0.0028692031652816	0.00148875776233006	0.00134230097755038	NA	0.00297220641806604	0.00232938970259401	0.00980893525106449	NA	NA	0.00152514329392493	NA	NA	NA	NA	NA	NA	0.00222174307139554	0.000344043695751103	NA	NA	NA	0.00107535559228791	NA	NA	NA	0.000863902511911056	0.00241320492371335
C9J830	NA	NA	NA	NA	0.0151842859363057	NA	0.00924185305305767	0.0269739386525554	NA	NA	0.0143604504909699	0.0380438241316112	0.0362698803083396	0.043859649	0.00709686508225244	NA	NA	NA	NA	0.0145556184869386	NA	NA	NA	NA	NA	NA	NA	NA	NA	NA	NA	NA	NA
C9J8H1	NA	NA	NA	NA	NA	NA	NA	NA	NA	NA	NA	NA	NA	0.007389163	NA	NA	NA	NA	NA	NA	NA	NA	0.00502354730750394	NA	NA	NA	NA	NA	NA	NA	NA	NA	0.0123423370305371
C9J8M6	NA	NA	0.00355602240813609	NA	NA	NA	NA	NA	NA	NA	NA	NA	NA	NA	NA	NA	NA	NA	NA	NA	NA	NA	NA	NA	NA	NA	NA	NA	NA	NA	NA	NA	NA
C9J8P9	NA	NA	0.0177339307428112	NA	0.0294291903102811	NA	NA	NA	NA	NA	NA	NA	NA	NA	NA	0.0136371562647405	NA	NA	NA	NA	NA	0.0146554727648464	NA	NA	NA	NA	NA	NA	NA	NA	NA	0.0144193182745752	NA
C9J8U2	NA	NA	NA	NA	NA	NA	NA	NA	NA	NA	0.00362188365405239	NA	NA	0.006882989	NA	NA	NA	NA	NA	NA	NA	NA	NA	NA	NA	NA	NA	NA	NA	NA	NA	NA	NA
C9J8Z4	NA	NA	NA	NA	NA	NA	NA	0.00817147734639934	NA	NA	NA	NA	NA	0.00896861	NA	NA	NA	NA	NA	NA	NA	NA	NA	NA	NA	NA	NA	NA	NA	NA	NA	NA	NA
C9J958	NA	NA	NA	NA	NA	NA	NA	NA	NA	NA	NA	0.013553112462088	NA	NA	NA	NA	NA	NA	NA	NA	NA	NA	NA	NA	NA	NA	NA	NA	NA	NA	NA	NA	NA
C9J9E8	NA	NA	NA	NA	0.00452847248862586	0.00286987060928764	NA	NA	NA	NA	NA	NA	NA	NA	NA	NA	NA	NA	NA	NA	NA	NA	NA	NA	NA	NA	NA	NA	NA	NA	NA	NA	NA
C9J9J4	NA	NA	NA	NA	NA	NA	NA	NA	NA	NA	NA	NA	NA	NA	NA	NA	NA	NA	NA	NA	NA	NA	NA	NA	NA	NA	NA	NA	NA	0.0031769852368141	NA	NA	NA
C9J9K3	0.00487305462436415	NA	NA	NA	NA	NA	NA	NA	NA	NA	NA	NA	NA	NA	NA	NA	NA	NA	NA	NA	NA	NA	NA	NA	NA	NA	NA	NA	NA	NA	0.00400050163272314	NA	NA
C9J9S3	NA	0.0119010988118407	0.0122896142290536	NA	NA	NA	0.0084285698158172	0.0109334365254808	NA	NA	0.019645095878745	0.0325274699090111	0.0165390655611849	0.030666667	NA	NA	NA	NA	0.0126007323760195	NA	NA	NA	NA	NA	NA	NA	NA	NA	NA	NA	NA	NA	NA
C9J9W2	NA	NA	0.00775859527605557	NA	NA	NA	NA	NA	NA	NA	NA	NA	NA	NA	NA	NA	NA	NA	NA	NA	NA	NA	NA	0.00717800704042869	NA	NA	NA	NA	NA	NA	NA	0.0126169035943427	0.00878750824883451
C9JA05	NA	0.0141679744926413	NA	0.0290597864557592	NA	0.0341924613882258	NA	0.0238626589098439	0.0188607038182305	NA	NA	NA	NA	NA	NA	NA	NA	NA	NA	0.0316064856993199	NA	NA	NA	NA	NA	0.0142741841877938	NA	0.0141025152637878	NA	NA	0.0274320094127352	NA	0.0132565835649747
C9JA17	NA	NA	NA	NA	NA	NA	NA	NA	NA	NA	NA	0.0186939478870785	NA	0.048275862	NA	NA	0.0139749894310754	0.00816898241750695	NA	NA	NA	NA	0.00586080519208793	NA	NA	NA	NA	NA	NA	NA	NA	0.0134000218633317	0.0165326361986022
C9JA28	NA	NA	NA	NA	NA	NA	NA	NA	NA	NA	NA	NA	NA	NA	NA	NA	NA	NA	NA	0.00784558190177436	NA	NA	NA	NA	NA	NA	NA	NA	NA	NA	NA	NA	NA
C9JAB2	NA	NA	NA	NA	NA	0.00509249445300999	NA	NA	NA	NA	NA	NA	NA	NA	NA	NA	NA	NA	NA	NA	NA	NA	NA	NA	NA	NA	NA	NA	NA	NA	NA	NA	NA
C9JAK5	NA	NA	0.0167342238802727	NA	0.00925673106973924	NA	NA	NA	NA	NA	NA	0.0141731890422084	0.00675615452978097	NA	NA	NA	NA	NA	NA	NA	NA	NA	NA	0.0087731189791375	NA	NA	NA	NA	NA	NA	NA	NA	NA
C9JB34	NA	NA	NA	NA	NA	NA	NA	NA	NA	NA	NA	NA	NA	NA	NA	NA	NA	NA	NA	NA	NA	NA	NA	NA	NA	NA	NA	NA	NA	0.0109342218668287	NA	NA	NA
C9JBD8	NA	NA	NA	NA	NA	NA	NA	NA	NA	NA	NA	NA	NA	0.001633987	NA	NA	NA	NA	NA	NA	NA	NA	NA	NA	NA	NA	NA	NA	NA	NA	NA	NA	NA
C9JC84	NA	0.00788731736666929	0.0117274913707548	NA	0.0120156780940114	0.00360549554130745	NA	0.00550097545273385	0.0151331128426174	0.00880629943750727	NA	0.00542908518933225	0.00635312954649442	0.005422993	NA	0.00904963808037302	0.007326007	NA	0.0225756999881204	0.0111582549316787	NA	0.0212738808001411	0.00792670749579463	0.0197264396405503	NA	NA	NA	0.0243974084453873	NA	0.0155536757845027	0.0111090144979969	0.0214174072660078	0.00949116241590302
C9JCF5	NA	NA	NA	NA	NA	NA	NA	NA	NA	NA	NA	NA	NA	NA	NA	NA	0.00278348038432616	NA	NA	NA	NA	NA	NA	NA	NA	NA	NA	NA	NA	NA	NA	NA	NA
C9JCK5	NA	NA	NA	NA	NA	NA	NA	NA	NA	NA	NA	NA	NA	NA	NA	NA	NA	NA	NA	NA	NA	NA	NA	NA	NA	NA	0.00758298553878874	NA	NA	NA	NA	NA	NA
C9JCQ4	NA	NA	0.0539304874938586	NA	NA	NA	NA	NA	NA	NA	NA	NA	NA	NA	0.021038934435481	0.0093090514579202	NA	NA	NA	NA	NA	NA	NA	0.00503987706195066	NA	NA	NA	NA	NA	NA	NA	NA	NA
C9JD14	NA	NA	0.0194455923679256	NA	0.00398390913210421	NA	NA	NA	NA	NA	NA	NA	NA	NA	NA	NA	NA	NA	NA	NA	NA	0.0321400086637887	NA	NA	NA	NA	NA	NA	NA	NA	NA	NA	NA
C9JD32	NA	NA	NA	NA	NA	NA	NA	NA	0.00644810371150196	NA	0.00899500727948263	NA	NA	NA	NA	NA	NA	NA	NA	NA	NA	NA	NA	NA	NA	NA	NA	NA	NA	NA	NA	NA	NA
C9JD84	NA	NA	NA	NA	0.000512587535578985	NA	NA	NA	NA	NA	NA	NA	NA	NA	NA	NA	NA	NA	NA	NA	NA	NA	NA	NA	NA	NA	NA	NA	NA	NA	NA	NA	NA
C9JDL2	NA	0.0281385097559941	NA	NA	NA	NA	NA	0.0139355076374574	NA	NA	NA	NA	0.0425387484842578	NA	NA	NA	NA	NA	NA	NA	NA	0.024148359265801	NA	0.0160840522513328	NA	NA	NA	NA	NA	NA	NA	0.0233515134274376	NA
C9JDM3	NA	NA	0.00533403361220413	NA	NA	NA	NA	NA	NA	NA	NA	NA	0.00807571560604733	0.0078125	NA	NA	NA	NA	NA	NA	NA	NA	NA	NA	NA	NA	NA	NA	NA	NA	NA	NA	NA
C9JDS9	NA	NA	NA	NA	NA	NA	NA	NA	NA	NA	NA	NA	NA	NA	NA	NA	NA	NA	NA	NA	NA	0.0124805224364264	NA	NA	NA	NA	NA	NA	NA	NA	NA	NA	NA
C9JDU5	NA	NA	0.00581894594497442	NA	NA	NA	NA	NA	NA	NA	NA	NA	NA	NA	NA	NA	NA	NA	NA	NA	NA	NA	NA	NA	NA	NA	NA	NA	NA	NA	NA	NA	NA
C9JDV8	NA	NA	0.0204826903817561	NA	NA	NA	NA	NA	NA	NA	NA	NA	NA	NA	NA	NA	NA	NA	NA	NA	NA	NA	NA	NA	NA	NA	NA	NA	NA	NA	NA	NA	NA
C9JDW2	NA	NA	NA	NA	NA	NA	NA	NA	NA	NA	NA	NA	NA	NA	NA	NA	NA	NA	NA	NA	NA	NA	NA	NA	NA	NA	NA	0.00288648017687211	NA	NA	NA	NA	NA
C9JEH7	NA	0.0126177889328391	0.0156356419505888	NA	NA	0.0041109258824414	NA	NA	0.00419926587877218	NA	0.002343164718209	NA	0.00944074980938257	0.008206107	NA	NA	0.00483390595834349	NA	0.00200393332201655	0.00402118154431223	NA	NA	0.00480217648516894	NA	NA	NA	NA	NA	NA	NA	0.00274843561324317	0.00476745611948367	0.00757559228304705
C9JEV0	NA	0.00436897866503486	NA	0.00448058339807034	0.00255011562485054	NA	NA	NA	0.00193869190998777	NA	NA	NA	NA	NA	NA	NA	NA	NA	NA	NA	NA	NA	NA	NA	NA	NA	NA	NA	NA	NA	NA	0.00183417528766951	NA
C9JEV6	NA	NA	NA	NA	0.00425309293436808	NA	NA	NA	NA	NA	NA	0.004884005028083	0.00931253690576907	0.004504505	NA	NA	NA	NA	NA	NA	NA	NA	NA	NA	NA	NA	NA	NA	NA	NA	NA	NA	NA
C9JEV8	NA	NA	NA	NA	NA	NA	NA	NA	NA	NA	NA	0.0172885627694428	NA	NA	NA	NA	NA	NA	NA	NA	NA	NA	NA	NA	NA	NA	NA	NA	NA	NA	NA	NA	NA
C9JEY1	NA	NA	NA	NA	NA	NA	NA	NA	NA	NA	NA	NA	NA	NA	NA	0.00369739824908138	NA	NA	NA	NA	NA	NA	NA	NA	NA	NA	NA	NA	NA	NA	NA	NA	NA
C9JF17	NA	NA	NA	NA	NA	NA	NA	NA	NA	NA	NA	NA	NA	NA	NA	NA	NA	NA	NA	0.00643155168581236	NA	NA	NA	NA	NA	NA	NA	NA	NA	NA	NA	NA	NA
C9JF98	NA	NA	NA	NA	NA	NA	NA	0.001874731760792	NA	NA	NA	NA	NA	NA	NA	NA	NA	NA	NA	NA	NA	NA	NA	NA	NA	NA	NA	NA	NA	NA	NA	NA	NA
C9JFK9	NA	NA	NA	NA	NA	NA	NA	NA	NA	NA	NA	NA	NA	0.003436426	NA	NA	NA	NA	NA	NA	NA	NA	NA	NA	NA	NA	NA	NA	NA	NA	NA	NA	NA
C9JFL5	NA	NA	NA	0.0176578559754478	NA	NA	NA	0.0107158374495112	NA	NA	NA	NA	NA	NA	NA	NA	NA	NA	NA	0.0179249745874458	NA	0.0127226122777756	0.00708180635875459	NA	NA	NA	NA	0.0205661681752885	NA	NA	NA	NA	NA
C9JFR7	NA	NA	NA	NA	0.014022572051396	NA	NA	NA	NA	NA	NA	NA	NA	NA	NA	0.0311899313119114	NA	NA	NA	0.016429113442879	NA	NA	NA	0.0234528927426187	NA	NA	NA	NA	NA	NA	NA	NA	NA
C9JFV4	NA	NA	NA	NA	NA	NA	NA	NA	NA	NA	NA	0.00149345541091236	NA	0.002754821	NA	NA	NA	NA	NA	NA	NA	NA	NA	NA	NA	NA	NA	NA	NA	NA	NA	NA	NA
C9JG32	NA	NA	NA	NA	NA	NA	NA	NA	NA	NA	NA	NA	NA	NA	NA	NA	NA	NA	0.00250014491267904	NA	NA	NA	NA	NA	NA	NA	NA	NA	NA	NA	NA	NA	NA
C9JGM8	NA	NA	NA	NA	NA	NA	NA	NA	NA	NA	NA	NA	0.00535591485801555	NA	NA	NA	NA	NA	NA	NA	NA	NA	NA	NA	NA	NA	NA	NA	NA	NA	NA	NA	NA
C9JH44	NA	NA	NA	NA	NA	NA	0.00450244085277176	NA	NA	NA	NA	0.0332070565795791	NA	NA	NA	NA	NA	NA	NA	NA	NA	NA	NA	NA	NA	NA	0.00892243058884448	NA	NA	NA	NA	NA	NA
C9JI87	NA	NA	0.00979363659278264	NA	NA	NA	0.021589574029684	NA	0.0096193029074452	NA	NA	0.00592485804319543	0.0112971761896062	NA	NA	0.0105197371750354	NA	NA	0.0172141156637109	0.00906743394136202	NA	0.00924976523674417	NA	0.00690343760563371	NA	NA	NA	NA	NA	NA	NA	0.00910071764706269	NA
C9JIF9	NA	NA	NA	NA	NA	NA	NA	NA	NA	NA	NA	NA	0.00147790919102394	NA	NA	NA	NA	NA	NA	NA	NA	NA	NA	NA	NA	NA	NA	NA	NA	0.00228039879990846	NA	NA	NA
C9JIK8	NA	NA	NA	NA	NA	NA	NA	NA	NA	NA	NA	NA	NA	0.00456621	NA	NA	NA	NA	NA	NA	NA	NA	NA	NA	NA	NA	NA	NA	NA	NA	NA	NA	NA
C9JIS1	NA	NA	NA	NA	NA	NA	NA	NA	NA	NA	NA	NA	NA	NA	NA	NA	NA	NA	NA	0.00718329155071131	NA	NA	NA	NA	NA	NA	NA	NA	NA	NA	NA	NA	NA
C9JIZ0	NA	NA	NA	NA	NA	NA	NA	NA	NA	NA	0.0218278845825652	NA	NA	0.053333333	NA	NA	NA	NA	NA	NA	NA	NA	NA	NA	NA	NA	NA	NA	NA	NA	NA	NA	NA
C9JJK5	NA	NA	NA	NA	NA	NA	NA	NA	NA	NA	NA	NA	NA	NA	NA	NA	NA	NA	NA	NA	NA	0.00444280093651885	NA	NA	NA	NA	NA	NA	NA	NA	NA	0.00655681631654076	NA
C9JJP5	NA	NA	NA	NA	NA	NA	NA	NA	NA	NA	NA	NA	NA	NA	NA	NA	NA	NA	NA	0.00611175142110379	NA	NA	NA	NA	NA	NA	NA	NA	NA	NA	NA	NA	NA
C9JKG1	NA	0.0482251238333665	0.0860254838128731	0.0308824630211805	0.0487578593209167	0.0860065689064011	NA	0.0246357722288775	0.104904391261635	0.050920753228237	0.0130618990122913	0.014418204377796	0.0192442581795598	NA	NA	0.0246689872035374	NA	0.0577549927677765	0.0111708621695286	0.0524673258568526	NA	NA	0.00994466483429507	0.0650984114974896	0.0508021381715132	NA	NA	0.0183782779648786	NA	NA	NA	0.0206702464913095	0.0148078863708986
C9JKR2	0.0282985888455757	NA	NA	NA	NA	NA	NA	NA	NA	NA	NA	NA	0.010753616698863	NA	NA	NA	NA	NA	NA	NA	NA	NA	NA	NA	NA	NA	NA	NA	NA	NA	NA	NA	NA
C9JKZ2	NA	NA	0.0076714199216563	NA	NA	0.00896431564505694	NA	NA	NA	NA	NA	NA	0.00709775755833967	0.007490637	NA	NA	NA	NA	NA	NA	NA	NA	NA	NA	NA	NA	NA	NA	NA	NA	NA	NA	NA
C9JL25	NA	NA	NA	NA	NA	NA	NA	0.00953370062558059	NA	NA	NA	NA	NA	NA	NA	NA	NA	NA	NA	NA	NA	0.00752314305458848	NA	NA	NA	NA	NA	NA	NA	NA	NA	0.0047583753553689	NA
C9JL41	NA	NA	0.0129637282452838	NA	0.0239034566809983	NA	NA	0.0230663220605106	NA	NA	NA	NA	NA	0.012658228	0.00682736434085806	NA	NA	NA	0.0132919119485531	0.0140028733690825	NA	NA	NA	NA	NA	NA	0.011326485227189	NA	NA	NA	NA	0.0105407045005869	NA
C9JL73	NA	NA	NA	NA	0.0014277016157778	NA	NA	NA	NA	NA	NA	0.00218598584600615	NA	NA	NA	NA	NA	0.00358216506061725	NA	NA	NA	0.00113757252361993	0.00385501587070631	NA	NA	0.000671500602918238	NA	NA	NA	NA	NA	NA	0.00280633368956534
C9JL85	NA	NA	0.0196948943615036	NA	NA	NA	NA	NA	NA	NA	NA	NA	NA	NA	NA	NA	NA	NA	NA	NA	NA	NA	NA	NA	NA	NA	NA	NA	NA	NA	NA	NA	NA
C9JLI6	NA	NA	0.0158371322241432	NA	NA	0.00102812400006578	NA	0.00704474024534331	NA	NA	NA	NA	NA	0.006872852	NA	NA	NA	NA	NA	0.0228088041015069	NA	NA	NA	NA	NA	NA	NA	NA	NA	NA	NA	NA	NA
C9JLK0	NA	NA	NA	NA	NA	NA	NA	0.00535952776216428	NA	NA	NA	0.00637793534005603	0.00608053887006455	0.017647059	NA	NA	NA	NA	NA	NA	NA	NA	NA	NA	NA	NA	NA	NA	NA	NA	NA	NA	NA
C9JLM5	NA	NA	NA	NA	NA	NA	NA	NA	NA	NA	NA	0.00840503100105065	NA	NA	NA	NA	NA	NA	NA	NA	NA	NA	NA	NA	NA	NA	NA	NA	NA	NA	NA	NA	NA
C9JLU1	NA	NA	NA	NA	NA	NA	NA	NA	NA	NA	NA	NA	0.0069844029377497	0.006756757	NA	0.00709500722389972	NA	NA	0.00709500722389972	0.00747450691018219	NA	0.00762480704317346	NA	NA	NA	NA	NA	NA	NA	NA	NA	NA	NA
C9JLV5	NA	0.0031187364985875	0.0048308230679813	0.00479760604819148	NA	0.00376332110405714	NA	0.0085954687258998	0.00830345444474301	NA	0.00514808577795657	NA	0.00650120483415531	NA	0.00339221233555544	NA	NA	NA	0.00660415724486322	0.0034787011066303	NA	0.00177432605372249	NA	0.00595909968394245	0.00618725512633791	NA	0.00562762451041661	0.00620865446897948	NA	0.00292579507287996	NA	NA	NA
C9JLW8	NA	NA	NA	NA	0.0097338813965655	NA	NA	NA	NA	NA	NA	NA	NA	NA	NA	NA	NA	NA	NA	NA	NA	NA	NA	NA	NA	NA	NA	NA	NA	NA	NA	NA	NA
C9JM50	NA	NA	NA	0.0077838710269934	NA	NA	NA	NA	NA	NA	NA	NA	NA	NA	NA	NA	NA	NA	NA	NA	NA	NA	NA	NA	NA	NA	NA	NA	NA	NA	NA	NA	NA
C9JM55	NA	NA	NA	NA	NA	NA	NA	NA	NA	NA	NA	NA	NA	NA	NA	NA	NA	NA	NA	0.00937480463969092	NA	NA	NA	NA	NA	NA	NA	NA	NA	NA	NA	NA	NA
C9JMM3	NA	NA	NA	NA	0.013113701876704	NA	NA	NA	NA	NA	NA	NA	NA	NA	NA	NA	NA	NA	NA	NA	NA	NA	NA	NA	NA	NA	NA	NA	NA	NA	NA	NA	NA
C9JMN2	NA	NA	0.0073981982422505	NA	NA	NA	NA	NA	NA	NA	NA	NA	NA	NA	NA	NA	NA	NA	NA	NA	NA	NA	NA	NA	NA	NA	NA	NA	NA	NA	NA	NA	NA
C9JNG9	0.00950854608961388	0.0033326607332468	0.0140183399835251	0.0151567837908554	0.0108618915991871	0.0119453167683802	0.00175595239615233	NA	0.0109263637908486	0.00827305108131357	0.00469608077088481	0.00359262652398036	0.0113993214585121	0.0025	NA	0.00160426014233086	0.00197008492935332	0.00881391317896422	0.00309184590334804	0.00417532542456108	NA	0.000940392458646784	0.00651526238033992	0.00236874219069191	0.00556906754110457	0.000832660427876883	0.001367044024442	0.00356480243106729	0.0163350070629471	NA	NA	0.00161916894070317	0.000515534228042302
C9JNQ3	NA	NA	0.00984744769281907	NA	NA	NA	NA	NA	NA	NA	NA	NA	NA	NA	NA	NA	NA	NA	NA	NA	NA	NA	NA	NA	NA	NA	NA	NA	NA	NA	NA	NA	NA
C9JNW5	NA	0.0154273507524267	0.0386895265042358	0.0113010277836029	0.0152118939503719	0.0239347228919756	0.00702380853103808	0.0151853288113187	0.0176033239157483	NA	0.0272848551142972	0.0228897009266098	0.0310107479272217	0.016111111	0.0239716342694146	0.0198344862641116	0.0202637353336308	NA	0.00933387595076199	0.0288848155412477	NA	0.00752314305458848	0.0317264944044073	0.0226346477052223	0.00327924498085343	NA	0.0228669152986186	0.0307121448568056	NA	NA	0.017068805814141	0.027757187907554	0.0192809649102239
C9JP16	NA	NA	NA	NA	NA	NA	NA	NA	NA	NA	NA	NA	0.00288740660473723	0.005586592	NA	NA	NA	NA	NA	0.00309001940637857	NA	NA	NA	NA	NA	NA	NA	NA	NA	NA	NA	NA	NA
C9JQ42	NA	NA	NA	NA	NA	NA	NA	NA	NA	NA	NA	NA	NA	NA	NA	NA	NA	NA	NA	0.00650721761144154	NA	NA	NA	NA	NA	NA	NA	NA	NA	NA	NA	NA	NA
C9JQS9	NA	NA	NA	NA	NA	NA	NA	NA	NA	NA	NA	NA	NA	0.001355014	NA	NA	NA	NA	NA	NA	NA	NA	NA	NA	NA	NA	NA	NA	NA	NA	NA	NA	NA
C9JQU6	NA	NA	NA	0.0207569897443466	NA	NA	NA	NA	NA	NA	NA	NA	NA	NA	NA	NA	NA	NA	NA	NA	NA	NA	0.0156088798624445	NA	NA	NA	NA	NA	NA	NA	NA	NA	NA
C9JQV0	NA	NA	NA	NA	NA	NA	NA	0.00474541485492223	NA	NA	NA	NA	NA	NA	NA	NA	NA	NA	NA	NA	NA	NA	NA	NA	NA	NA	NA	NA	NA	NA	NA	NA	NA
C9JR56	NA	NA	NA	NA	NA	NA	NA	0.00530360687881529	NA	NA	NA	NA	NA	0.002196595	0.00177713880234883	NA	NA	NA	NA	0.00531547817655493	NA	NA	NA	NA	NA	NA	NA	NA	NA	NA	NA	NA	NA
C9JRJ8	NA	NA	NA	NA	NA	NA	NA	NA	NA	NA	NA	NA	NA	NA	NA	NA	NA	NA	NA	NA	NA	0.00806050985139481	NA	NA	NA	NA	NA	NA	NA	NA	NA	NA	NA
C9JSX3	NA	NA	NA	NA	0.00625289132999797	NA	NA	NA	NA	NA	NA	0.0215413711596924	NA	0.01986755	0.00714386506745277	NA	NA	NA	NA	0.007326007	NA	NA	NA	NA	NA	NA	NA	NA	NA	NA	NA	NA	0.00307271784820774
C9JSZ1	NA	NA	NA	NA	0.00939489105175886	NA	NA	0.00634610731816075	NA	NA	NA	0.0107885474978223	NA	0.005527916	NA	NA	NA	NA	NA	0.0137590421361964	NA	NA	0.00507353285285224	NA	0.00489439561127659	NA	NA	NA	NA	NA	NA	NA	NA
C9JTK6	NA	NA	0.013243118286898	NA	NA	NA	NA	0.00785448057673723	NA	NA	NA	NA	0.00891113481829071	NA	NA	NA	NA	NA	NA	NA	NA	NA	0.00879120880791207	0.0204201911683789	NA	NA	0.00771372722415619	NA	NA	NA	NA	0.00717858343846898	NA
C9JTN7	NA	NA	NA	NA	0.0043311308950582	NA	NA	0.00255410726177436	NA	NA	NA	NA	NA	0.004587156	NA	NA	NA	NA	NA	0.0050744357418927	NA	NA	0.00311859385041234	NA	NA	NA	NA	NA	NA	NA	NA	NA	NA
C9JTV5	NA	NA	0.00931031371678598	NA	NA	NA	NA	NA	NA	NA	NA	NA	NA	NA	NA	NA	NA	NA	NA	NA	NA	NA	NA	NA	NA	NA	NA	NA	NA	NA	NA	NA	NA
C9JTX5	NA	NA	NA	NA	NA	NA	NA	NA	NA	NA	NA	NA	NA	NA	NA	NA	NA	NA	NA	NA	NA	NA	NA	NA	NA	NA	NA	NA	NA	NA	0.0370046374623582	NA	NA
C9JU14	NA	NA	NA	NA	NA	NA	NA	NA	NA	NA	NA	NA	NA	NA	NA	NA	NA	NA	NA	NA	NA	NA	0.0122865084373785	NA	NA	NA	NA	NA	NA	NA	NA	NA	NA
C9JU26	NA	NA	NA	NA	NA	NA	NA	NA	NA	NA	NA	NA	NA	NA	NA	0.0107149088687465	NA	NA	NA	NA	NA	NA	NA	NA	NA	NA	NA	NA	NA	NA	NA	NA	NA
C9JUG7	NA	NA	NA	NA	NA	NA	NA	NA	NA	NA	NA	NA	0.0138061545026211	NA	NA	NA	NA	NA	NA	NA	NA	NA	NA	NA	NA	NA	NA	NA	NA	NA	NA	NA	NA
C9JUM1	NA	NA	NA	NA	NA	NA	NA	NA	NA	NA	NA	NA	NA	NA	NA	NA	NA	NA	NA	NA	NA	0.00130610069970228	NA	NA	NA	NA	NA	NA	NA	NA	NA	NA	NA
C9JV37	NA	NA	0.011051811452845	NA	0.00169817706521138	0.017219225251374	0.00757964953182423	0.00327740875511754	0.00949819643973582	0.0644073591018119	0.00883322664073852	NA	0.00371831478684879	NA	NA	0.0232927205125741	NA	0.00852160049141039	NA	0.00397923341712131	NA	NA	NA	0.02820336920117	0.0212325237660308	NA	NA	NA	NA	NA	NA	NA	NA
C9JV77	0.0234491811616694	NA	0.00781782097529442	0.0294387459714116	0.0108112964199208	0.0207866382550881	NA	0.00347755624415299	0.0111980429301699	0.0364780402052412	NA	NA	NA	NA	NA	0.0470622138859985	NA	0.0668552570336995	0.013879623757364	0.036029785176818	NA	NA	NA	0.0502374611713143	0.0296634024609362	0.0249480414992477	NA	NA	0.0858217564677404	NA	NA	NA	NA
C9JVG0	0.0305250297100122	NA	0.0115071293704172	NA	0.0335946514046524	0.0179286312901139	NA	0.0153559505550171	0.0280202721571286	NA	NA	0.0121825729387168	NA	NA	NA	NA	NA	NA	NA	NA	NA	0.00633972750874326	0.0229164084455661	NA	0.0221072716340342	NA	NA	NA	NA	NA	NA	NA	NA
C9JVL0	NA	NA	NA	NA	NA	NA	NA	NA	NA	NA	NA	NA	NA	NA	NA	NA	NA	NA	0.0065628814458435	NA	NA	NA	NA	NA	NA	NA	NA	NA	NA	0.0116300357403389	NA	NA	NA
C9JVY5	NA	NA	NA	NA	NA	NA	NA	NA	NA	NA	NA	NA	0.00102548718736411	NA	NA	NA	NA	NA	NA	NA	NA	NA	NA	NA	NA	NA	NA	NA	NA	NA	NA	NA	NA
C9JW96	NA	NA	0.00865189968273347	0.00206726086983818	NA	NA	0.00856561941459362	0.015498382254874	NA	NA	NA	0.0132225487963906	0.00567020982194954	0.009497007	0.00618779993357272	0.00827283863146648	0.00411864574721789	NA	0.013592902492636	0.0148860097687813	NA	0.00313737280577202	0.00912492065453831	0.0083451621175327	0.00340397861843701	NA	0.00830532185236258	0.00601936641559373	NA	NA	NA	0.00479544952134025	0.0135170454773569
C9JXX4	NA	NA	NA	NA	NA	0.00992318532225888	0.00786247229913643	NA	NA	0.00904038092008013	NA	NA	NA	NA	NA	NA	NA	NA	0.0104483687269797	NA	NA	NA	NA	0.00589239306136194	NA	0.0111849954453582	NA	NA	0.0190932470715394	NA	NA	NA	NA
C9JYQ9	NA	NA	NA	NA	NA	NA	NA	NA	NA	NA	NA	0.00896073571822118	NA	NA	NA	NA	NA	NA	NA	NA	NA	NA	NA	NA	NA	NA	NA	NA	NA	NA	NA	NA	NA
C9JYS8	NA	NA	NA	0.00248071304380581	NA	NA	NA	NA	NA	NA	NA	NA	NA	NA	NA	NA	NA	NA	0.00512224916384247	NA	NA	0.0055047387929069	NA	0.00231096762116405	NA	NA	0.00290989415997494	NA	NA	NA	NA	NA	NA
C9JZ81	NA	0.00757067375640676	0.0156356419505888	NA	0.028830122842269	NA	NA	0.0347755615304101	0.0123178475752534	NA	NA	0.0333827298548147	0.0118361636624132	0.026717557	NA	NA	NA	NA	NA	0.0126667215327154	NA	NA	NA	0.00361640039239189	NA	NA	0.00683047593331764	NA	NA	NA	NA	0.00635660815931156	0.0177091764401756
C9JZD1	NA	NA	NA	0.0205473232429143	0.0174849361503342	NA	NA	NA	NA	NA	NA	NA	NA	0.02020202	NA	0.00530333848906238	NA	NA	NA	0.0111740098163689	NA	NA	NA	0.00957067542224034	NA	NA	NA	NA	NA	NA	NA	0.0126169035943427	0.014060013012543
C9JZG1	NA	NA	NA	NA	0.0123057482464516	NA	0.0158118905637791	NA	0.010428509224362	NA	NA	0.0154158619971183	NA	0.011848341	0.0102248678154405	NA	NA	NA	NA	0.0052427813641478	NA	NA	0.00483308092355192	NA	NA	NA	NA	0.00467855917318651	NA	NA	NA	0.00789303930618815	0.00879583762558664
C9JZR2	NA	NA	NA	NA	0.000544513314635683	NA	NA	NA	NA	NA	NA	NA	NA	0.001121364	NA	NA	NA	NA	NA	NA	NA	NA	NA	NA	NA	NA	NA	NA	NA	NA	NA	NA	NA
C9JZT2	NA	NA	NA	NA	NA	NA	NA	NA	NA	NA	NA	NA	NA	0.003546099	NA	NA	NA	NA	NA	NA	NA	NA	NA	NA	NA	NA	NA	NA	NA	NA	NA	NA	NA
C9JZW3	NA	NA	0.0225084509914711	NA	0.0155635137341713	NA	NA	0.0200246090410517	NA	NA	NA	NA	0.0113592483363489	NA	0.0118541049888969	0.0115391322240112	NA	NA	0.0115391322240112	0.0243126809667916	NA	0.0124007846471777	0.0112063756257843	0.020824107191742	NA	NA	0.0196657653429718	NA	NA	NA	NA	NA	NA
C9K025	NA	0.0298934219845905	0.0224256404983922	NA	0.0175779404116728	0.0134385267406732	NA	NA	NA	NA	NA	NA	0.0219934385101778	NA	0.00860683642225184	NA	NA	NA	0.00837814610211597	0.0152008143124351	NA	NA	0.0162860026849978	NA	NA	NA	0.0158651116897827	NA	NA	NA	NA	0.00812045394898888	0.0148078863708986
C9K028	NA	0.0330586074800824	0.0170689089928415	NA	0.052454807506816	NA	NA	0.0151853288113187	0.0146694368898456	NA	NA	0.0361416328708182	0.0344563862412381	0.033333333	0.107872355291089	NA	NA	NA	NA	NA	NA	NA	0.0339926723576264	0.0105277429644644	0.0327924527598551	NA	0.0596528217789591	0.0164529351325365	NA	0.0310134283307693	NA	0.0138785943701348	NA
C9K0S0	NA	NA	NA	NA	0.00518783759666158	NA	NA	NA	NA	NA	NA	NA	NA	NA	NA	NA	NA	NA	NA	NA	NA	NA	NA	NA	NA	NA	NA	NA	NA	NA	NA	NA	NA
C9WEN0	NA	NA	NA	NA	NA	NA	NA	NA	NA	NA	NA	NA	NA	0.005524862	NA	NA	NA	NA	NA	NA	NA	NA	NA	NA	NA	NA	NA	NA	NA	NA	NA	NA	NA
D3DP16	NA	NA	NA	0.0153093161375918	NA	NA	NA	NA	NA	NA	NA	NA	NA	NA	0.0165791838315348	NA	NA	NA	NA	NA	NA	NA	NA	NA	0.0135559908566735	NA	0.0241057883760348	NA	NA	NA	NA	NA	NA
D3DQX7	NA	NA	NA	NA	NA	NA	NA	NA	NA	NA	NA	0.0118497160863909	NA	0.09965847	NA	NA	NA	NA	NA	NA	NA	NA	NA	NA	NA	NA	NA	0.0283206258859766	NA	NA	NA	NA	NA
D3DS95	NA	NA	NA	NA	NA	NA	NA	NA	NA	NA	NA	NA	NA	0.067375887	NA	NA	NA	NA	NA	NA	NA	NA	NA	0.010439745139577	NA	NA	NA	NA	NA	NA	NA	NA	NA
D3DTX7	0.0179517948220396	0.0147763487463202	0.00839667409509708	0.0108467444307934	0.0131475962846707	0.0151786177948283	0.0239995075864154	0.010884796399738	0.00433799327372121	0.0330914618780342	0.0138340282236182	0.00727404111407336	0.0160330538840321	0.00531684	NA	0.0213909990812866	0.017200734957739	0.0189970412503378	0.00772505854355513	0.00942578400397009	NA	0.0110658436038606	0.010485711248846	0.0431168913915255	0.0155339237397578	0.00958891765929136	0.00213600617634158	0.00380718969906169	0.0133007524652881	NA	0.00341709508461016	0.00325279549044444	0.00438625666458338
D3DU92	NA	NA	NA	NA	NA	NA	NA	NA	NA	NA	NA	NA	NA	NA	0.00353679904696985	NA	NA	NA	NA	NA	NA	NA	NA	NA	NA	NA	NA	NA	NA	NA	NA	NA	NA
D3YTB1	NA	NA	0.0121920777057247	NA	0.0153814849577077	NA	0.00792158818068212	NA	NA	NA	NA	0.0163044962112975	NA	NA	0.0121660545808218	NA	NA	NA	NA	0.0166349922404364	NA	NA	0.00766752016501033	NA	NA	NA	0.012334229868609	NA	NA	NA	NA	NA	0.00697714939124368
D3YTG3	NA	NA	NA	NA	NA	NA	NA	NA	0.000306038187106262	NA	NA	NA	NA	NA	NA	NA	NA	NA	NA	NA	NA	NA	NA	NA	NA	NA	NA	NA	NA	NA	NA	NA	NA
D3YTI2	NA	NA	NA	NA	NA	NA	NA	0.0160785832864928	NA	NA	NA	NA	0.0121610777401291	NA	NA	NA	NA	NA	NA	0.00433814544303669	NA	NA	NA	NA	NA	NA	NA	NA	NA	NA	NA	NA	NA
D6R909	NA	0.00427482014651028	0.00588583012214701	0.0175360774549572	0.0122093080903392	NA	NA	0.0137453405537303	NA	NA	NA	0.00623131560094317	0.0178222686028898	0.025862069	0.0139490109392915	NA	NA	NA	0.00603483305477197	0.0115231981071047	NA	0.00972820212847895	0.00879120880791207	NA	NA	NA	0.00771372722415619	0.0106376732962364	NA	NA	0.00827689959869604	0.00717858343846898	0.0159993250242095
D6R938	NA	NA	NA	NA	0.00491763784969405	NA	NA	NA	NA	NA	NA	NA	NA	NA	NA	NA	NA	NA	NA	0.00256071081338183	NA	NA	NA	NA	NA	NA	NA	NA	NA	NA	NA	NA	NA
D6R956	NA	NA	NA	NA	NA	NA	NA	0.00666672943315076	NA	NA	NA	NA	NA	NA	NA	NA	NA	NA	NA	NA	NA	NA	NA	NA	NA	NA	NA	NA	NA	NA	NA	0.0101550688888371	NA
D6R991	NA	NA	NA	NA	NA	NA	NA	NA	NA	NA	NA	NA	NA	NA	NA	NA	NA	NA	NA	NA	NA	0.00915278440447651	NA	NA	NA	NA	NA	NA	NA	NA	NA	NA	NA
D6R9A4	NA	NA	NA	NA	0.00800158048606124	NA	NA	NA	NA	NA	NA	NA	NA	NA	NA	NA	NA	NA	NA	NA	NA	NA	NA	NA	NA	NA	NA	NA	NA	NA	NA	NA	NA
D6R9A6	NA	NA	NA	NA	NA	NA	NA	NA	NA	NA	NA	NA	NA	0.014925373	NA	NA	NA	NA	0.00783627680775	NA	NA	NA	NA	NA	NA	NA	NA	NA	NA	NA	NA	NA	NA
D6R9B6	NA	0.00553690985682482	NA	NA	0.0249612533966838	0.00687779420958751	NA	0.0172798563577022	0.0171986499039111	NA	NA	0.0167978479371505	0.0120427613998708	0.015123153	NA	0.00663831678027358	NA	NA	0.0156905674124926	0.00762915191125429	NA	NA	0.0195164827377407	NA	0.00226154890719886	NA	NA	0.00680811122548766	NA	NA	NA	0.0172285994196099	0.0170659473729948
D6R9C5	NA	NA	NA	NA	NA	0.0100355229441524	0.0304806774177126	NA	NA	NA	NA	NA	NA	NA	NA	NA	NA	NA	NA	NA	NA	NA	NA	NA	NA	NA	NA	NA	NA	NA	NA	NA	NA
D6R9D3	NA	0.0247939558580014	NA	NA	0.0550775471268076	0.0249320030124746	NA	0.093010136805418	0.132024929368112	NA	0.0335944784682718	0.149084237082967	0.0387634349090272	0.1125	NA	NA	0.101318676668154	NA	0.078754577350122	0.0967948610022443	NA	NA	NA	NA	NA	NA	NA	NA	NA	NA	NA	0.052044727847111	0.0850630798858365
D6R9F5	NA	NA	NA	NA	NA	NA	NA	NA	NA	NA	NA	0.0120472109569394	NA	NA	NA	NA	NA	NA	NA	NA	NA	NA	NA	NA	NA	NA	NA	NA	NA	NA	NA	NA	NA
D6R9G2	NA	NA	NA	NA	0.00617115404649283	NA	NA	NA	NA	NA	NA	NA	NA	NA	NA	NA	NA	NA	NA	NA	NA	NA	NA	NA	NA	NA	NA	NA	NA	NA	NA	NA	NA
D6R9I7	NA	NA	NA	NA	NA	NA	NA	NA	NA	NA	NA	NA	NA	NA	NA	NA	0.0128251490992377	NA	0.0132919119485531	NA	NA	NA	NA	NA	NA	NA	NA	NA	NA	NA	NA	NA	NA
D6R9I9	NA	NA	0.00201073553218556	NA	0.00298662816353022	NA	NA	0.0021863693243172	NA	NA	NA	NA	0.00270599889782097	NA	NA	NA	NA	NA	NA	NA	NA	NA	NA	NA	NA	NA	NA	NA	NA	NA	NA	NA	NA
D6R9K7	NA	NA	NA	NA	NA	NA	NA	NA	NA	NA	NA	NA	NA	0.003333333	NA	NA	NA	NA	NA	NA	NA	NA	NA	NA	NA	NA	NA	NA	NA	NA	NA	NA	NA
D6R9L0	NA	0.00247939558580014	0.00369826342735767	NA	0.00865504348411313	0.00664853387071853	NA	0.0227779927614183	NA	NA	0.00818545661614374	0.00361416296180712	0.0114854620804127	0.003333333	0.00449468183003656	0.00175010206891195	NA	NA	0.00437525464724935	0.00368742290753365	NA	0.011284714017647	0.00260610536004804	0.00315832260509025	0.00109308166028448	NA	NA	0.00493588044104334	NA	NA	NA	0.00832715645553776	0.00463980434053725
D6R9P3	NA	NA	0.00471951398363973	NA	0.0195799047711969	NA	NA	NA	0.0141962287371734	NA	NA	0.0149896176944346	0.0119088890347606	NA	NA	0.0221787086643087	NA	NA	0.00967798200079149	0.0144438242942754	NA	NA	0.0105737580498871	0.0197940975499946	NA	NA	NA	NA	NA	NA	NA	0.0115121980374817	0.00427631742869522
D6R9Q9	NA	NA	NA	NA	0.0105495698028517	0.00891423542870186	NA	NA	0.00614641178507049	NA	NA	0.0171622282448142	0.00577481320947445	0.04255121	0.0120527767418071	NA	0.0141506527131224	NA	0.00586626255716764	0.00309001940637857	NA	NA	0.00569709580052306	NA	NA	NA	0.00499883962892219	0.00551495003697783	NA	NA	NA	0.00465204256372556	0.0103682775241643
D6R9T0	NA	0.0184799667295321	NA	NA	0.010751606836021	NA	NA	0.0122614454372949	0.00820030600792629	NA	0.00508413444250596	0.00336723284249086	0.00642044457702004	NA	0.0268005846294763	NA	NA	NA	0.00326105903830354	0.0274838996461678	0.0216981712607625	0.00233637929091383	0.0137237499122899	NA	NA	NA	0.00555771617586695	NA	NA	NA	NA	NA	0.00576373198477163
D6R9W4	NA	NA	NA	NA	NA	NA	NA	NA	NA	NA	NA	NA	NA	0.020504732	NA	NA	NA	NA	NA	NA	NA	NA	NA	0.00448342351647584	NA	NA	NA	NA	NA	NA	NA	NA	NA
D6R9Y6	NA	NA	NA	NA	NA	0.00293317715351282	NA	NA	NA	NA	NA	NA	NA	NA	NA	NA	NA	NA	NA	NA	NA	NA	NA	NA	NA	NA	NA	NA	NA	NA	NA	NA	NA
D6R9Z1	NA	NA	NA	NA	NA	NA	NA	NA	NA	NA	NA	NA	NA	NA	NA	NA	NA	NA	NA	NA	NA	NA	NA	NA	NA	NA	0.00695107067375123	NA	NA	NA	NA	NA	NA
D6RA32	NA	NA	NA	0.00194101629613316	NA	NA	NA	NA	NA	NA	NA	NA	NA	NA	NA	NA	NA	NA	NA	NA	NA	NA	NA	NA	NA	NA	NA	NA	NA	NA	NA	NA	NA
D6RA47	NA	NA	NA	NA	NA	NA	NA	NA	NA	NA	NA	NA	NA	0.002673797	NA	NA	NA	NA	NA	NA	NA	NA	NA	NA	NA	NA	NA	NA	NA	NA	NA	NA	NA
D6RA62	NA	NA	0	NA	NA	NA	NA	NA	NA	NA	NA	0	NA	0.021276596	NA	NA	NA	NA	NA	NA	NA	NA	NA	NA	NA	NA	NA	NA	NA	NA	NA	NA	NA
D6RA73	NA	NA	NA	NA	NA	NA	NA	NA	NA	NA	NA	NA	NA	NA	NA	NA	NA	NA	NA	NA	NA	NA	NA	NA	NA	NA	NA	0.0199027433954405	0.0214266029085913	NA	NA	NA	NA
D6RA82	NA	NA	NA	0.00895327924372025	NA	NA	NA	NA	NA	NA	NA	0.0133622239206779	NA	NA	NA	NA	0.00713511856041013	NA	NA	NA	NA	NA	NA	NA	NA	NA	NA	0.00347597237794592	NA	NA	NA	NA	NA
D6RAA6	NA	NA	NA	NA	NA	NA	NA	NA	NA	NA	NA	NA	NA	NA	NA	0.0220292524276578	NA	NA	0.00367154154624578	NA	NA	NA	NA	NA	0.00687953561970043	NA	NA	NA	NA	NA	NA	NA	NA
D6RAC2	NA	0.00737366693370848	0.0133251698962983	NA	0.00701997395803142	NA	NA	NA	NA	NA	NA	NA	0.00384271957061683	0.001858736	0.00802024920737351	NA	NA	NA	NA	0.00462641381382517	NA	NA	0.00379100426874954	NA	NA	NA	0.00332636540363224	0.0073395989339705	NA	NA	NA	NA	0.012073839904998
D6RAC8	NA	NA	NA	NA	NA	NA	0.00210293659761621	NA	NA	0.00318466459367519	NA	NA	NA	NA	NA	0.00375520830910049	NA	0.00591069068180854	NA	NA	NA	NA	NA	0.00882565294344267	0.00949082981191075	NA	NA	NA	NA	NA	NA	NA	NA
D6RAE9	NA	NA	NA	NA	NA	NA	NA	NA	NA	NA	NA	NA	NA	NA	NA	NA	NA	NA	NA	0.00658468447459886	NA	NA	NA	NA	NA	NA	NA	NA	NA	NA	NA	NA	NA
D6RAF8	NA	0.00959765998021535	0.00991097885357616	0.00656188726420369	0.0121830521513806	0.00686300334866437	0.00339861638541025	0.0117563835370778	0.00378566082054635	NA	NA	0.00547953746365912	0.0133379562977991	0.006451613	0.00579958890135115	0.00677458740055404	NA	0.00382097495912282	0.00451639125034902	0.0214108451511522	NA	0.0145609215315067	0.00657922707240836	0.0173198354746824	NA	NA	0.00384856888725121	0.00424591839359209	NA	NA	NA	0.0107447181683163	0.0059868444001733
D6RAI5	NA	NA	NA	NA	NA	NA	NA	NA	NA	NA	NA	NA	NA	NA	NA	NA	NA	NA	NA	NA	NA	NA	NA	NA	NA	NA	NA	NA	NA	NA	NA	0.00895393152935834	NA
D6RAK7	NA	0.0218166282154962	NA	NA	0.00293225623815362	NA	0.0215949377608006	0.00565912852319464	NA	NA	NA	NA	NA	NA	NA	NA	NA	NA	0.00978317711491062	NA	NA	NA	NA	NA	NA	NA	NA	NA	NA	NA	NA	NA	NA
D6RAN1	NA	NA	NA	NA	NA	NA	NA	NA	NA	NA	NA	0.0183771021396908	0.0262802950462999	NA	NA	NA	NA	NA	NA	0.0374992196649907	NA	NA	NA	NA	NA	NA	NA	NA	NA	NA	NA	NA	NA
D6RAN4	NA	NA	0.0162201779928379	NA	0.019561875529453	NA	NA	0.0100676213315068	NA	NA	NA	0.0169725898424977	0.0114220068543124	NA	0.0119195975319647	0.00773525673629146	NA	NA	0.00889554477420771	NA	NA	NA	0.00563414476995446	NA	NA	NA	0.0170554333357958	NA	NA	NA	NA	0.0107348238410158	0.0119626627693118
D6RAQ8	NA	NA	0.0474136348395066	NA	NA	NA	NA	NA	NA	NA	NA	NA	NA	0.018518519	0.0199763626103278	0.0437525433223104	NA	NA	0.0194455751599361	0.102428424791684	NA	0.0470196421163531	0.0125898787642816	0.0350924768640469	NA	NA	NA	NA	NA	NA	NA	NA	0.00572815396508839
D6RAS7	NA	0.0195045789388805	0.0505239692669534	0.0061025550641711	0.033990714992491	0.00659534612950798	0.0716428434344462	0.0370522018622803	NA	NA	NA	0.016651436373845	0.0436906985353607	0.021333333	0.0151021297407525	0.0168009765013594	0.00270183171554636	NA	0.00840048825067969	0.0412991403255486	NA	0.0361110848564705	0.0183560432566787	0.00568498125766058	0.00393509437053355	NA	0.0268437696663128	0.0157948174113387	NA	NA	NA	0.0177646001609087	0.0197964982103053
D6RAT0	NA	NA	NA	NA	NA	NA	0.013923848782187	NA	NA	NA	NA	NA	NA	NA	NA	NA	0.0070670151855141	NA	NA	NA	NA	NA	NA	NA	NA	NA	0.00788363307467448	NA	NA	NA	NA	NA	NA
D6RAX7	NA	NA	NA	NA	0.0026082501335395	NA	NA	0.0025169053328767	NA	NA	NA	NA	0.00571100342715621	0.002762431	0.00148994915213382	NA	NA	NA	0.00290072114485167	0.00611175142110379	NA	NA	NA	NA	NA	NA	NA	0.00545401165705271	NA	NA	NA	NA	NA
D6RBE9	0.0209928953612568	0.0135239762831856	NA	0.0300559644931569	0.0281672094812627	0.0174416091443561	0.0474905216629851	0.0412584060502374	0.00500094413421645	0.00725234996006478	0.019223420444073	NA	0.0104543805541225	0.019859307	0.0122582217999061	0.0258992324074832	0.00575674280829297	0.0107682035573944	0.0194897690785619	0.0344079690279801	NA	0.028981197158326	0.0319251526825527	0.0311558594798516	0.0176632072387478	NA	0.024103225690824	0.0197862566170319	0.00805120929959268	0.00422910432848816	0.00727363915765656	0.0136893405872229	0.0142006130034743
D6RBJ7	NA	NA	0.00147145804260401	NA	0.00203488436699436	NA	NA	NA	NA	NA	NA	NA	NA	NA	NA	NA	NA	NA	0.00301741652738598	0.0015894070169203	NA	NA	0.00293040259604396	0.00272269196628448	0.00141346818997098	NA	NA	NA	NA	NA	NA	NA	NA
D6RBL5	NA	0.00476806812907465	0.0276256282157965	0.017603523910619	0.0236046631892299	0.0199456024099797	0.0121565915667692	0.0210258394019923	0.0101557642037776	NA	0.0157412625344582	0.0080276125991984	0.0119272112183276	0.015384615	0.0124468107237673	0.00807739287182617	NA	0.0182231134391669	0.0121160893077393	0.0212735955693859	NA	0.00868054959156583	0.0117666948659746	NA	0.0113512342152038	0.0115291494588132	0.0103245272077168	0.0113904937811044	NA	NA	NA	0.00960825783302771	0.0107072412141448
D6RBM0	NA	0.00233905286981974	0.00845394062500091	NA	NA	NA	NA	NA	NA	NA	0.00193053257600655	NA	0.00243795232965404	NA	0.0152649555099995	NA	NA	NA	0.00742967742550164	NA	NA	0.00532297816116747	0.0096205674752146	0.00893864952591368	0.00232022116426351	NA	NA	0.00698473677118995	NA	NA	NA	NA	0.00218858735578361
D6RBV0	NA	NA	NA	NA	0.00828233812678005	NA	NA	NA	NA	NA	NA	NA	NA	0.027046784	NA	NA	NA	NA	NA	0.00970374565795905	NA	NA	NA	NA	NA	NA	NA	NA	NA	NA	NA	0.00730452335270253	NA
D6RBX4	NA	0.0152578186080938	0.0472677468772625	0.0312951544099501	0.014525946214839	0.0736453009605945	NA	0.0140172259642883	0.0665766740998768	0.0818213820647513	0.0251860205462605	0.016680753382474	0.0238544214029635	0.023076923	NA	0.0323095704372436	NA	0.0273346707510016	0.0403869622590088	0.0170188762342633	NA	0.0173610980546603	0.0313778519561521	0.0291537502579381	0.0605399138468732	NA	NA	NA	NA	NA	NA	0.0384330296666796	0.0285526423097586
D6RC04	NA	NA	NA	NA	NA	NA	NA	NA	NA	NA	NA	NA	0.0101342317946715	NA	NA	NA	NA	NA	NA	NA	NA	NA	NA	NA	NA	NA	NA	NA	NA	NA	NA	NA	NA
D6RC15	NA	NA	NA	NA	NA	NA	NA	NA	NA	NA	NA	NA	0.00258422899393515	NA	NA	NA	NA	NA	NA	NA	NA	NA	NA	NA	NA	NA	NA	NA	NA	NA	NA	NA	NA
D6RC46	NA	NA	NA	NA	NA	NA	NA	NA	NA	NA	NA	NA	0.00363975939389115	NA	NA	NA	NA	NA	NA	NA	NA	NA	NA	NA	NA	NA	NA	NA	NA	NA	NA	NA	NA
D6RCA8	NA	NA	NA	NA	NA	NA	NA	NA	NA	NA	NA	0.0161828207046089	NA	NA	NA	NA	NA	NA	NA	NA	NA	NA	NA	NA	NA	NA	NA	NA	NA	NA	NA	NA	NA
D6RCB3	NA	NA	NA	NA	NA	NA	NA	NA	NA	NA	NA	NA	NA	NA	NA	NA	NA	NA	NA	0.0116444947895509	NA	NA	NA	NA	NA	NA	NA	NA	NA	NA	NA	NA	NA
D6RCF2	NA	NA	0.00840056990280769	NA	NA	NA	NA	NA	NA	NA	NA	NA	NA	NA	NA	0.0107862153632014	NA	NA	NA	NA	NA	NA	NA	0.00627562901790335	NA	NA	NA	NA	NA	NA	0.00882050339902856	NA	NA
D6RD47	NA	0.0228203073837927	NA	NA	NA	0.0089308668698154	NA	NA	NA	NA	NA	0.0420753340488329	NA	NA	NA	NA	NA	NA	NA	NA	NA	0.0252642854509923	NA	NA	NA	NA	0.0267102183330536	NA	NA	NA	NA	0.0134643075111684	0.032317045485758
D6RD66	NA	NA	0.00278676015027559	NA	0.00192691097244766	NA	NA	NA	NA	NA	NA	0.00442550648623755	NA	0.004081633	NA	NA	NA	NA	NA	NA	NA	NA	NA	0.00386733451760815	NA	NA	0.00243480865045892	NA	NA	NA	NA	NA	NA
D6RDM7	NA	NA	NA	NA	0.0153526268406791	NA	NA	0.0111112160256245	NA	NA	NA	0.0132225487963906	NA	NA	NA	NA	NA	NA	NA	NA	NA	NA	0.00829089547312786	NA	NA	NA	0.0109121015340194	NA	NA	NA	NA	0.0135400921293546	0.00754439702254388
D6RDY6	NA	NA	NA	NA	NA	NA	NA	NA	NA	NA	NA	NA	NA	NA	NA	NA	NA	NA	NA	0.0020638567076089	NA	NA	NA	NA	NA	NA	NA	NA	NA	NA	NA	NA	NA
D6RE83	NA	NA	NA	NA	NA	NA	NA	NA	NA	NA	NA	NA	NA	NA	NA	NA	NA	NA	NA	NA	NA	NA	NA	NA	NA	NA	NA	NA	NA	NA	NA	NA	0.00949667543142045
D6RE86	NA	NA	NA	0.00571400334905031	0.0035362787970624	NA	NA	NA	NA	NA	NA	NA	NA	NA	0.00606024518833522	NA	NA	NA	NA	NA	NA	NA	NA	NA	0.0110536358170171	NA	NA	NA	NA	NA	NA	NA	NA
D6REL8	0.00299639026625796	NA	NA	NA	NA	NA	NA	NA	NA	NA	NA	0.0128555261739213	NA	NA	0.0204904596024506	NA	NA	0.0355744721981886	NA	NA	NA	NA	NA	NA	NA	0.0110205103063846	NA	NA	0.007326007	NA	NA	NA	NA
D6RER5	NA	NA	0.00396951364781423	NA	0.00792921519802876	NA	NA	NA	0.00454866281301532	NA	NA	0.00560335436211677	0.00560917963633717	0.005813953	NA	NA	NA	NA	NA	0.00285846729300249	NA	NA	NA	NA	NA	NA	NA	NA	NA	NA	NA	NA	NA
D6REX3	NA	NA	0.000657339716941987	NA	NA	NA	NA	NA	NA	NA	NA	NA	NA	NA	NA	NA	NA	NA	NA	0.000710030682736337	NA	NA	NA	0.00111494041924614	NA	NA	NA	NA	NA	NA	NA	NA	NA
D6RF35	0.00684889366719763	NA	NA	0.00534187259251469	NA	NA	NA	NA	0.00161795230691327	NA	NA	NA	NA	NA	NA	NA	NA	NA	0.00367668474517726	NA	NA	NA	NA	NA	0.00275566788579724	NA	NA	NA	NA	NA	NA	NA	NA
D6RF62	NA	NA	NA	NA	NA	NA	NA	0.00750605564378263	NA	NA	NA	NA	NA	NA	NA	NA	NA	NA	NA	NA	NA	NA	NA	NA	NA	NA	NA	0.00187676093551311	NA	NA	NA	NA	NA
D6RFH5	NA	NA	NA	NA	NA	NA	NA	NA	NA	NA	NA	NA	NA	NA	NA	NA	NA	NA	NA	NA	NA	NA	NA	NA	NA	NA	NA	NA	0.00137949019886273	NA	NA	NA	NA
D6RFI1	NA	NA	NA	NA	0.0114216110378493	NA	NA	NA	NA	NA	NA	NA	NA	NA	NA	NA	NA	NA	NA	NA	NA	NA	NA	NA	NA	NA	NA	NA	NA	NA	NA	NA	NA
D6RFL4	NA	NA	NA	0.00290597874728517	NA	0.00911798933120896	NA	NA	NA	NA	NA	NA	0.0177204272393136	0.014285714	NA	0.00450026126284668	NA	NA	NA	NA	NA	NA	0.0058273156109463	0.00406070062761559	NA	NA	NA	0.00564100650038555	NA	NA	NA	NA	NA
D6RFM3	NA	NA	NA	NA	NA	NA	NA	NA	NA	NA	NA	0.00886911234098148	NA	NA	NA	NA	NA	NA	NA	0.00678666824694946	NA	NA	NA	NA	NA	NA	NA	NA	NA	NA	NA	NA	NA
D6RFM5	NA	0.00180648167326457	NA	NA	NA	NA	NA	NA	NA	NA	NA	NA	NA	NA	NA	NA	NA	NA	0.00127511956211995	NA	NA	NA	NA	NA	NA	NA	NA	NA	NA	NA	NA	NA	NA
D6RG13	NA	NA	0.00918506308923606	NA	0.00635103007767351	0.0143107463384134	NA	0.00715004290587935	NA	NA	0.00917652059849128	0.00972420639668853	0.0115884704818025	0.01793722	NA	0.00941758786624104	NA	NA	NA	NA	NA	NA	0.00228650217222492	0.0106221619756822	0.00220576992827014	NA	0.00300939148703545	0.00664019750876381	NA	NA	NA	NA	0.00832251912131715
D6RGD2	NA	NA	NA	NA	0.00349698741890414	NA	NA	NA	NA	NA	NA	NA	NA	NA	0.007990544396897	NA	NA	NA	NA	NA	NA	NA	NA	NA	NA	NA	NA	NA	NA	NA	NA	NA	NA
D6RGG3	0.00409154826329226	0.00678450502054478	0.00581249696990772	0.00441901166875039	0.0138220003957175	0.00680412791947059	0.0044827590886806	0.00511966820942886	0.00616234103288185	0.0038904319428164	0.00198855600377574	0.00204019338887798	0.00306363034829165	0.002210969	0.00293865223049853	0.00313164636661873	0.00116881833316442	0.00283989662967803	0.00335099781569841	0.00487742003492222	0	0.00185738380583517	0.00569897525539651	0.00253726588010024	0.00705142054180534	0.000852248605745872	0.00177488141698229	0.00175629485029292	0.00693022472668373	NA	0.0020329577949537	0.000779124564752872	0.0032845091410185
D6RGZ6	NA	NA	0.00392326885360482	NA	0.00327016737775925	0.00253297422592525	0.0019903741012972	0.00274923265896577	NA	NA	0.00206182811867515	NA	NA	NA	NA	0.00110207895470523	NA	NA	0.00102860723440376	0.00203179824964496	NA	NA	NA	NA	NA	NA	NA	0.000621647487795027	NA	NA	NA	NA	0.000779144711649926
D6RH31	NA	NA	NA	NA	NA	NA	NA	0.00195519274242244	NA	NA	NA	NA	NA	NA	NA	NA	NA	NA	NA	NA	NA	NA	NA	NA	NA	NA	NA	NA	NA	NA	NA	NA	NA
D6RHD5	NA	NA	NA	NA	NA	NA	NA	NA	NA	NA	NA	NA	NA	NA	NA	NA	NA	NA	NA	NA	NA	NA	NA	NA	NA	NA	NA	NA	NA	NA	NA	NA	0.00206823268711181
D6RHF4	NA	NA	NA	NA	NA	NA	NA	NA	NA	NA	NA	NA	0.0195036155361575	0.056603774	NA	NA	NA	NA	NA	NA	NA	NA	NA	NA	NA	NA	NA	NA	NA	NA	NA	NA	NA
D6RHH4	NA	NA	NA	NA	NA	NA	NA	NA	NA	NA	NA	0.0116335732173435	NA	NA	NA	NA	NA	NA	NA	NA	NA	NA	NA	NA	NA	NA	NA	NA	NA	NA	NA	NA	NA
D6RHH9	NA	NA	0.0100899955192437	NA	0.00232558240347542	NA	NA	NA	NA	NA	NA	NA	NA	NA	NA	NA	NA	NA	NA	0.00544939359019479	NA	NA	NA	NA	NA	NA	NA	NA	NA	NA	NA	NA	NA
D6RIU0	NA	NA	NA	NA	NA	NA	NA	NA	0.0104781690812946	NA	NA	NA	NA	NA	NA	NA	NA	NA	NA	NA	NA	NA	NA	NA	NA	NA	NA	NA	NA	NA	NA	NA	NA
D6RIZ7	NA	NA	NA	NA	0.0214587849749871	NA	NA	NA	NA	NA	NA	NA	NA	NA	NA	NA	NA	NA	NA	NA	NA	NA	NA	NA	NA	NA	NA	NA	NA	NA	NA	NA	NA
D6RJ96	NA	NA	NA	NA	NA	NA	NA	NA	NA	NA	NA	NA	0.000648895765610725	NA	NA	NA	NA	NA	NA	NA	NA	NA	NA	NA	NA	NA	NA	NA	NA	NA	NA	NA	NA
D6RJI3	NA	NA	NA	NA	NA	NA	0.00191210745555874	NA	NA	NA	NA	NA	NA	NA	NA	NA	NA	NA	0.00142930317353396	NA	NA	NA	NA	NA	0.000669537615448024	NA	NA	NA	NA	NA	NA	NA	NA
D6W5Y5	NA	NA	NA	NA	0.00360376547330694	NA	NA	NA	NA	NA	NA	NA	0.0118361636624132	NA	NA	NA	NA	NA	NA	NA	NA	NA	0.00194614543793977	NA	NA	NA	NA	NA	NA	NA	NA	NA	NA
E1A689	NA	NA	NA	NA	NA	NA	NA	NA	NA	NA	NA	NA	NA	NA	NA	NA	NA	NA	NA	0.000300657006769783	NA	NA	NA	NA	NA	NA	NA	NA	NA	NA	NA	NA	NA
E1B2D1	NA	NA	NA	NA	NA	NA	NA	NA	NA	NA	NA	NA	NA	NA	NA	NA	NA	NA	NA	NA	NA	NA	NA	NA	NA	NA	NA	NA	NA	NA	0.0747419955437437	NA	NA
E1NZA1	NA	NA	NA	NA	0.00111244812027425	NA	NA	NA	NA	NA	NA	0.000744881229414348	NA	NA	NA	NA	NA	NA	NA	NA	NA	NA	NA	NA	NA	NA	NA	NA	NA	NA	NA	NA	NA
E2PSM9	NA	NA	NA	NA	0.00474248936045691	NA	NA	NA	NA	NA	NA	0.00445581775119676	NA	NA	NA	NA	NA	NA	NA	0	NA	NA	NA	NA	NA	NA	NA	NA	NA	NA	NA	NA	NA
E2QRB3	NA	NA	0.00467641328240392	NA	NA	NA	NA	NA	NA	NA	NA	NA	NA	NA	NA	NA	NA	NA	NA	0.00589314216342744	NA	NA	NA	NA	NA	NA	NA	NA	NA	NA	NA	NA	NA
E2QRI1	NA	0.0179233414287617	0.0215931973337802	NA	0.0199075469381287	NA	NA	0.0219546922353736	NA	NA	NA	NA	NA	0.021084337	0.00649833424019628	NA	NA	NA	0.00632566845862081	0.00999602742024143	NA	NA	0.00921488158297893	NA	NA	NA	NA	NA	NA	NA	NA	NA	NA
E5RFD8	NA	NA	NA	NA	NA	0.00653954152526125	NA	NA	NA	NA	NA	0.0177745741295863	NA	NA	NA	0.00344282355276659	NA	NA	NA	NA	NA	NA	NA	NA	NA	NA	NA	NA	NA	NA	NA	NA	NA
E5RFE7	NA	0.00740598635104851	NA	0.00660449632075424	0.00817477545337284	NA	NA	NA	NA	NA	NA	NA	NA	NA	0.0177224538869577	NA	NA	0.00384578673096178	NA	0.0107749384322939	NA	0.0170282633140096	0.00827743641429999	0.0184219230988019	0.0111792450130981	0.0190013498727225	0.00805524350456657	0.0224307325502318	NA	0.0242030692034102	0.010494821691982	0.0451054310784014	NA
E5RFF0	NA	NA	NA	NA	NA	NA	0.00675366127915764	NA	NA	NA	NA	0.0104254715417019	0.013252456564689	NA	NA	0.00336558001324056	NA	NA	NA	NA	NA	0.00482252704932706	NA	0.00911054725169844	NA	NA	NA	NA	NA	NA	NA	NA	0.0178454010956138
E5RFI3	NA	NA	NA	NA	NA	NA	NA	NA	NA	NA	NA	NA	NA	NA	NA	NA	NA	NA	NA	0.00628538038342914	NA	NA	NA	NA	NA	NA	NA	NA	NA	NA	NA	NA	NA
E5RFK4	NA	NA	NA	NA	NA	NA	NA	NA	NA	NA	NA	NA	NA	NA	NA	NA	NA	NA	NA	NA	NA	0.00388235577107502	NA	NA	NA	NA	NA	NA	NA	0.00533487882265098	NA	NA	NA
E5RFL2	NA	NA	NA	NA	NA	NA	NA	NA	NA	NA	NA	NA	NA	NA	0.039519822671637	NA	NA	NA	0.0163145073769456	NA	NA	0.0283825588782894	NA	0.012044451431655	NA	NA	0.017061718357067	0.0292806467343508	NA	0.0760629997929019	0.0571435614405759	0.0583344189771459	NA
E5RFM3	NA	NA	NA	NA	0.0100445376478663	NA	NA	NA	NA	NA	NA	NA	NA	NA	NA	NA	NA	NA	NA	NA	NA	NA	NA	NA	NA	NA	NA	NA	NA	NA	NA	NA	NA
E5RFQ1	NA	NA	NA	NA	NA	NA	NA	NA	NA	NA	NA	NA	NA	0.002754821	NA	NA	NA	NA	NA	NA	NA	NA	NA	NA	NA	NA	NA	NA	NA	NA	NA	NA	NA
E5RFS4	NA	NA	NA	NA	NA	NA	NA	NA	NA	NA	NA	NA	0.00795147414555171	NA	NA	NA	NA	NA	NA	NA	NA	NA	NA	NA	NA	NA	NA	NA	NA	NA	NA	NA	NA
E5RFV2	NA	NA	NA	NA	NA	NA	NA	NA	NA	NA	NA	NA	NA	NA	NA	NA	NA	NA	NA	0.00539622942762442	NA	NA	NA	NA	NA	NA	NA	NA	NA	NA	NA	NA	NA
E5RG36	NA	NA	0.0568963626267155	0.0226020555672058	NA	0.0354588483742643	NA	0.00506177657414615	NA	NA	NA	NA	NA	NA	NA	NA	NA	NA	NA	NA	NA	NA	NA	NA	NA	NA	NA	NA	NA	NA	NA	NA	NA
E5RG43	NA	NA	NA	NA	NA	NA	NA	NA	NA	NA	NA	NA	NA	NA	NA	NA	NA	NA	NA	NA	NA	NA	NA	NA	NA	NA	NA	NA	NA	NA	NA	NA	0.0124558507716892
E5RG99	NA	NA	NA	NA	NA	NA	NA	0.0239768340541204	NA	NA	NA	NA	0.0272024099728318	NA	NA	NA	NA	NA	NA	NA	NA	NA	NA	NA	NA	NA	NA	NA	NA	NA	NA	NA	NA
E5RGA2	NA	NA	NA	NA	0.00804704401155023	NA	NA	NA	NA	NA	NA	0.00308025273372463	NA	NA	NA	NA	NA	NA	NA	NA	NA	NA	NA	NA	NA	NA	NA	NA	NA	NA	NA	0.00473133874378906	NA
E5RGE1	NA	NA	NA	0.0130396477555702	0.0499569592155721	NA	0.0137721724540665	0.020098229335896	0.0390724020155271	NA	NA	0.0467715254656613	0.0822561773686861	0.089928145	0.0423028841317579	NA	NA	NA	0.0137262875452023	0.0717859716588675	NA	NA	NA	NA	NA	0.0195920177673544	NA	NA	NA	0.0273647902509158	0.0188258883984919	0.0356241990208091	0.0136464830270057
E5RGH4	NA	NA	NA	NA	NA	NA	NA	0.0227779927614183	NA	NA	NA	NA	NA	NA	NA	NA	NA	NA	NA	NA	NA	NA	NA	NA	NA	NA	0.0178958464442085	NA	NA	NA	NA	NA	NA
E5RGH6	NA	NA	NA	NA	NA	NA	0.0319264004982254	0.0207072663952311	NA	NA	NA	NA	NA	0.087121212	NA	NA	NA	NA	NA	NA	NA	NA	NA	NA	NA	NA	NA	NA	NA	NA	NA	0.0126169035943427	0.021090019982795
E5RGM5	NA	NA	NA	NA	NA	0.00578133418219286	NA	0.0132046338282006	NA	NA	NA	NA	0.0149810380355078	0.014492754	NA	NA	NA	NA	NA	NA	NA	NA	NA	NA	NA	NA	NA	NA	NA	NA	NA	NA	NA
E5RGQ0	NA	NA	NA	NA	NA	NA	NA	NA	NA	NA	NA	NA	NA	NA	NA	NA	NA	NA	NA	NA	NA	NA	NA	NA	NA	0.00248555432137006	NA	NA	NA	NA	NA	NA	NA
E5RGW4	NA	NA	NA	NA	0.0240047424023703	0.0135224426769566	NA	NA	NA	NA	NA	NA	0.0175201970420971	0.016949153	0.073133800014514	NA	NA	NA	NA	NA	NA	0.0573799022054318	NA	NA	NA	NA	NA	0.0167317985569902	NA	NA	NA	NA	0.015728150731566
E5RGX5	NA	NA	NA	NA	NA	NA	NA	0.00903888608874691	NA	NA	NA	0.00322693102228332	NA	NA	NA	NA	NA	NA	NA	NA	NA	NA	NA	NA	NA	NA	NA	NA	NA	NA	NA	NA	NA
E5RH35	NA	NA	0.0262598598314278	NA	NA	0.0153427709004865	NA	NA	NA	NA	NA	NA	NA	NA	NA	NA	NA	NA	NA	NA	NA	NA	0.00392223162199154	NA	NA	NA	NA	NA	NA	NA	NA	NA	NA
E5RH50	NA	NA	NA	NA	0.00041194858197844	NA	NA	NA	NA	NA	NA	NA	NA	NA	NA	NA	NA	NA	NA	NA	NA	NA	NA	NA	NA	NA	NA	NA	NA	NA	NA	NA	NA
E5RH81	NA	NA	NA	NA	NA	NA	NA	NA	NA	NA	NA	NA	NA	NA	NA	NA	NA	NA	0.00469118125944194	NA	NA	NA	NA	NA	NA	NA	NA	NA	NA	NA	NA	NA	0.00939008056650095
E5RHC5	NA	NA	NA	NA	NA	NA	NA	NA	NA	NA	NA	NA	NA	NA	NA	NA	NA	NA	0.00462581916048546	NA	NA	NA	NA	NA	NA	NA	NA	NA	NA	NA	NA	NA	NA
E5RHF4	NA	NA	NA	NA	0.00476861877842086	NA	NA	0.00575201808879541	NA	NA	NA	NA	NA	NA	NA	NA	NA	NA	NA	NA	NA	NA	NA	NA	NA	NA	NA	NA	NA	NA	NA	NA	NA
E5RHG6	NA	NA	NA	NA	0.0190744751136834	0.0161176583519383	NA	0.00920322930652054	NA	NA	NA	NA	0.0104413291640115	0.013468013	NA	NA	NA	NA	NA	0.0111740098163689	NA	NA	NA	NA	NA	NA	NA	NA	NA	NA	NA	NA	NA
E5RHH1	NA	NA	NA	0.0133827964610136	0.0331293515629337	NA	NA	0.0319691123758671	0.0231622678932742	NA	NA	0.00475547815198253	0.086140966119941	0.029605263	0.00811070341345574	NA	NA	NA	0.0138165927938971	0.0592621602713897	NA	NA	0.0201272403056796	NA	0.051777557558798	NA	NA	NA	NA	NA	NA	NA	0.0170940163333333
E5RHJ2	NA	NA	NA	NA	NA	NA	NA	NA	NA	NA	NA	NA	0.0141601587292759	NA	NA	NA	NA	NA	NA	NA	NA	NA	NA	NA	NA	NA	NA	NA	NA	NA	NA	NA	NA
E5RHJ4	NA	NA	0.0062702113622546	NA	0.00770764483397715	NA	NA	0.00371885627715064	NA	NA	NA	NA	0.0021095743513947	0.008163265	NA	NA	NA	NA	NA	0.00677281828512377	NA	0.00460600611299907	0.0052029602940749	NA	NA	NA	0.00365221387048071	0.00402929049844341	NA	NA	NA	NA	NA
E5RHN8	NA	NA	0.0168813377315361	NA	NA	NA	NA	0.0100123045205258	NA	NA	NA	NA	NA	NA	NA	NA	NA	NA	NA	NA	NA	NA	NA	NA	NA	NA	NA	NA	NA	NA	NA	NA	NA
E5RHS5	NA	NA	NA	NA	NA	NA	NA	NA	0.00778908179926007	NA	NA	NA	NA	NA	NA	NA	NA	NA	NA	NA	NA	NA	NA	NA	NA	NA	NA	NA	NA	NA	NA	NA	0.00410602176202361
E5RI98	0.0254693213382841	NA	NA	NA	NA	NA	NA	NA	NA	NA	NA	NA	0.0183049550291434	0.00625	NA	NA	NA	NA	NA	NA	NA	0.0282117850441176	0.0127472522615824	NA	NA	NA	NA	NA	NA	NA	0.0180022559070737	NA	NA
E5RIA2	NA	NA	0.00220373265817313	NA	NA	0.00187282664472119	NA	NA	NA	NA	NA	NA	NA	NA	NA	NA	NA	NA	NA	NA	NA	NA	NA	NA	NA	NA	NA	NA	NA	NA	NA	NA	NA
E5RID5	NA	NA	NA	NA	NA	NA	NA	NA	NA	NA	NA	NA	NA	NA	NA	NA	NA	NA	0.0117274858714459	NA	NA	NA	NA	NA	NA	0.0034336525056937	NA	NA	NA	NA	NA	NA	NA
E5RII3	NA	NA	NA	NA	0.0251783077165741	NA	NA	NA	NA	NA	NA	NA	NA	NA	NA	NA	NA	NA	NA	NA	NA	NA	NA	NA	NA	NA	NA	NA	NA	NA	NA	NA	NA
E5RIM3	NA	NA	NA	NA	NA	NA	NA	NA	NA	NA	NA	NA	NA	0.001808318	NA	NA	NA	NA	NA	NA	NA	NA	NA	NA	NA	NA	NA	NA	NA	NA	NA	NA	NA
E5RIN3	NA	NA	NA	NA	NA	NA	NA	0.00806300672263004	NA	NA	NA	NA	NA	NA	NA	NA	NA	NA	NA	NA	NA	NA	NA	NA	NA	NA	NA	NA	NA	NA	NA	NA	NA
E5RIP1	NA	NA	0.0111318967239686	NA	0.0513144851118748	NA	NA	NA	NA	NA	NA	NA	0.0112357780097851	NA	NA	0.0456548275863106	0.044051598683526	NA	0.0228274132681248	0.0721452376774174	0.0759435994126687	NA	0.0221691339245867	0.0411955164834458	0.0213863820208243	NA	0.038904014125861	0.0429206996160955	NA	NA	NA	0.0181025136717275	0.0201730619467007
E5RIR4	NA	0.0210372956691433	0.028220596092257	NA	0.044062038267958	0.0272526578963938	NA	0.0214619313623673	0.0250358380667681	NA	0.043349412080358	0.0462612908986765	0.0775760931782392	0.061151139	NA	NA	NA	NA	NA	0.0298019440836765	NA	0.0401234281198434	0.0492893750715253	NA	NA	NA	0.035791692888417	0.0234728538723341	NA	NA	NA	NA	0.018559217362149
E5RIT6	NA	0.0232443336168763	0.00728300768808158	NA	0.0147529144932687	NA	NA	0.0238457111721097	NA	NA	NA	0.00508241717328298	0.00807571560604733	0.007220644	NA	NA	NA	NA	0.00451198099401741	0.020556561363621	NA	0.0242445027722885	NA	NA	NA	NA	0.00885471539027656	0.00694108187021719	NA	NA	NA	0.0260223639235555	0.0083716704246182
E5RIW3	NA	NA	NA	NA	NA	NA	NA	NA	NA	NA	NA	0.0129077262576313	NA	NA	NA	NA	NA	NA	NA	NA	NA	NA	NA	NA	NA	NA	NA	NA	NA	NA	NA	NA	NA
E5RIZ5	NA	NA	NA	NA	NA	NA	NA	NA	NA	NA	NA	NA	NA	NA	NA	NA	NA	0.119130989245468	NA	NA	NA	NA	NA	NA	NA	NA	NA	NA	NA	NA	NA	NA	NA
E5RJF5	NA	NA	NA	0.0039422190415867	NA	0.00309234146509626	NA	NA	0.00341149688971994	NA	NA	NA	NA	0.034403839	NA	NA	NA	NA	0.00407000400556234	NA	NA	NA	NA	NA	NA	NA	NA	NA	NA	NA	NA	NA	NA
E5RJH4	NA	NA	NA	NA	NA	NA	NA	NA	NA	NA	NA	NA	NA	NA	NA	NA	NA	NA	NA	NA	NA	NA	NA	NA	NA	NA	NA	NA	NA	NA	NA	NA	0.00463980434053725
E5RJP4	NA	NA	NA	NA	NA	NA	NA	NA	NA	NA	NA	NA	NA	NA	NA	NA	NA	NA	0.00162046468416642	NA	NA	NA	NA	NA	NA	NA	NA	NA	NA	NA	NA	NA	NA
E5RJR3	NA	NA	NA	NA	NA	NA	NA	NA	NA	NA	NA	NA	NA	0.013888889	NA	NA	NA	NA	NA	NA	NA	NA	NA	NA	NA	NA	NA	NA	NA	NA	NA	NA	NA
E5RJU9	NA	NA	0.0018115587785098	NA	0.0027835685763516	NA	NA	0.00340237337900523	0.00415172722237151	NA	NA	0.000745847295270645	0.0052009644875392	0.012849094	NA	NA	NA	NA	0.00165103931121581	0.00391353902151584	NA	NA	NA	NA	NA	NA	NA	NA	NA	NA	NA	NA	0.00645633135401838
E5RJY1	NA	NA	0.00497152686128974	NA	0.00458342980964955	0.0154917302440529	0.0264245209081186	0.0132687338331904	0.0170906059827134	NA	NA	NA	0.0301075226809439	0.014563107	NA	NA	NA	NA	0.00339825581241364	NA	NA	0.00547801659011312	NA	NA	0.00477560003109815	NA	NA	NA	NA	NA	NA	0.00404230901559124	NA
E5RK69	0.00336016878668725	0.00297230240353191	NA	0.00375383825221829	0.0043284390192681	0.00267446832942165	NA	0.00467240865476276	0.00290653146053757	NA	0.00430979761352972	NA	0.00518050566344002	0.015645281	NA	0.00307630710020634	0.0028340890633219	0.00287612226667382	0.00738712895251194	0.00343815678148067	0.00271437967790077	NA	0.00332795370177639	0.00568718987287918	0.00140138646647985	NA	NA	NA	0.00321130856263677	NA	0.00111902118730401	NA	0.00654331376599043
E5RK99	NA	NA	NA	0.0267655919049347	0.0248470134361536	0.0323678632101319	NA	0.0509507736177955	0.0347434022799945	NA	NA	0.0570657367395413	0.068006026482617	NA	NA	0.0172707402048256	NA	NA	NA	NA	NA	0.0296966153013741	0.026836320067646	0.037401192285136	0.0129443896356429	NA	NA	NA	0.023306130318541	NA	NA	NA	NA
E7EM57	NA	NA	NA	NA	0.00147529144932687	NA	NA	NA	NA	NA	NA	NA	0.00403785780302366	NA	NA	NA	NA	NA	NA	0.00345695932150873	NA	NA	NA	0.00175188192936693	NA	NA	NA	NA	NA	NA	NA	NA	0.00579975542567156
E7EMB3	NA	0.0137744200313072	0.0169334415993292	0.0181623664077129	0.0181093975150052	0.0113447211712037	0.00836167647147397	0.0364568407097991	0.00698544605419637	NA	0.0113686898355936	0.0229470685410393	0.00638081284116905	0.031305115	0.0256838943223971	0.0181955016535355	NA	NA	0.0166676355513563	0.0234122110964981	NA	0.0134341834618152	0.012140240346248	0.0319592202888185	0.00817022886531077	NA	0.00710152642356162	0.00979341365184599	NA	NA	NA	0.0132177087653254	0.0294590754136869
E7EMC6	NA	0.00420745893547702	0.00788790454870464	NA	0.0032188177934574	0.00266948751358783	NA	NA	NA	NA	0.00560273714315234	0.00983334039522925	0.00559356882583061	0.013821972	0.00675564216927212	0.00597762047947968	NA	NA	NA	NA	NA	0.00638327296319455	NA	NA	NA	NA	0.00472574274863731	0.00605767180934449	NA	NA	NA	0.00471031100830754	NA
E7EMD0	NA	NA	NA	NA	0.00338822940535303	NA	NA	NA	NA	NA	NA	NA	NA	NA	NA	NA	NA	NA	NA	NA	NA	0.00275737811677018	NA	0.00566684711494551	NA	NA	NA	NA	NA	NA	NA	NA	NA
E7EMK3	NA	NA	NA	NA	NA	NA	NA	NA	NA	NA	NA	NA	NA	NA	NA	NA	NA	NA	NA	NA	NA	NA	NA	NA	NA	NA	NA	NA	NA	0.00478364490145042	NA	NA	NA
E7EMU4	NA	NA	NA	NA	NA	NA	NA	0.00425756856163412	NA	NA	NA	NA	NA	NA	NA	NA	NA	NA	NA	NA	NA	NA	NA	NA	NA	NA	NA	NA	NA	NA	NA	NA	NA
E7EMV8	NA	NA	0.0203807869488378	NA	0.0105692523152054	NA	NA	NA	NA	NA	NA	0.0161828207046089	0.0111854692734227	NA	NA	0.023508829373189	NA	NA	NA	0.0192626585481842	NA	NA	0.00761030029905853	NA	NA	NA	NA	NA	NA	NA	NA	0.0124285916128259	NA
E7EN72	NA	NA	NA	NA	NA	NA	NA	0.00151853315446779	NA	NA	NA	NA	NA	NA	NA	NA	NA	NA	NA	NA	NA	NA	NA	NA	NA	NA	NA	NA	NA	NA	NA	NA	NA
E7EN95	0.000611263712118819	0.000471085161302026	0.00208837721834664	0.000673823788335559	0.00153172547807968	0.00130643695785367	NA	0.0021250190786136	0.000232266177240145	NA	0.00152017107946941	0.00205878283793098	0.00116290304727082	0.003737842	0.000809042664683168	0.00052503051566748	0.00101318676668154	0.000725507721934527	0.000787545773501221	0.000856308182909912	NA	0.000517215682985021	NA	NA	0.000163962593363429	NA	0.00073447506621695	0.0007403820661565	0.000674065853960888	NA	NA	0.00117968077543973	0.000347985325540293
E7END6	NA	NA	NA	NA	NA	NA	NA	NA	NA	NA	NA	NA	NA	NA	NA	0.00254047040646539	NA	NA	NA	NA	NA	NA	NA	0.00547612452122289	NA	NA	NA	NA	NA	NA	NA	NA	NA
E7END7	NA	NA	NA	NA	0.00181924160596283	0.00691754978431109	NA	NA	NA	NA	0.00709721652994066	0.00626733543687142	NA	0.001926782	NA	0.00606971713229395	NA	NA	NA	0.00905869917310518	NA	0.00326147757665249	NA	NA	0.00568655273485763	NA	0.012930524840884	NA	NA	NA	NA	NA	NA
E7ENL6	0.00443050295686326	0.00475590123905601	0.00354444354326328	0.009088533222885	0.00230067570706467	0.00307065022356336	0.00271353590935327	0.00134937740238352	0.00334355774123331	0.00306815675504962	0.0031101477329613	0.00265441285591682	0.00240986486156476	0.001765891	NA	0.00173330424259368	0.00125815303675627	0.00661958457303636	0.00196942621640482	0.00403101258350911	0.00322418633698457	0.00142193716062202	0.00155103568596048	0.00183950549298813	0.00336782690645492	0.00125136022780881	0.00225048322166822	0.00153007653944729	0.00462869322349626	NA	0.0016595343603424	0.00187586269831722	0.00153904537081704
E7ENQ8	NA	NA	0.00525197176145867	0.0052158588988096	NA	NA	NA	0.0140172259642883	NA	NA	NA	NA	0.00530098241913727	0.012820513	NA	NA	NA	NA	NA	NA	NA	NA	NA	NA	NA	NA	0.00458867846072112	NA	NA	NA	NA	0.0042703365371071	NA
E7ENU9	NA	NA	NA	0.00531662021965915	NA	NA	NA	NA	NA	NA	NA	0.0103753532160661	NA	NA	NA	NA	NA	NA	NA	NA	NA	NA	NA	NA	NA	NA	NA	NA	NA	NA	NA	NA	NA
E7ENV7	NA	NA	0.000669369201003192	NA	NA	NA	NA	0.000510431128670911	NA	NA	NA	NA	NA	NA	NA	NA	NA	NA	NA	0.000867629309852734	NA	NA	NA	NA	NA	NA	NA	NA	NA	NA	NA	NA	NA
E7ENZ3	NA	NA	NA	NA	NA	NA	NA	NA	NA	NA	NA	NA	NA	NA	NA	NA	NA	NA	NA	NA	NA	NA	NA	NA	NA	NA	NA	0.00101561366978169	NA	NA	NA	NA	NA
E7EPA6	NA	NA	NA	0.00175360784720497	NA	NA	NA	NA	NA	NA	NA	0.0026483096183129	0.00222778318772688	NA	NA	NA	NA	NA	NA	NA	NA	0.00145922975503614	0.00175824176158241	NA	NA	NA	0.00539960905690934	NA	NA	NA	NA	NA	0.00319986519043408
E7EPB3	NA	NA	NA	NA	NA	NA	NA	NA	NA	NA	NA	NA	NA	NA	NA	NA	NA	NA	NA	NA	NA	NA	NA	NA	NA	NA	NA	0.0238832920745286	NA	NA	NA	NA	NA
E7EPG1	NA	NA	NA	NA	NA	NA	NA	NA	NA	NA	NA	NA	NA	NA	NA	NA	0.00108594472158371	0.00126956270523162	NA	NA	NA	0.00181426265663094	NA	NA	NA	NA	NA	NA	NA	NA	NA	NA	0.000497299796983991
E7EPK1	NA	NA	NA	NA	NA	NA	NA	NA	NA	NA	NA	NA	NA	0.001246883	NA	NA	NA	NA	NA	NA	NA	NA	NA	NA	NA	NA	NA	NA	NA	NA	NA	NA	NA
E7EPL9	NA	NA	NA	NA	NA	NA	NA	NA	NA	NA	NA	NA	NA	NA	NA	NA	NA	NA	NA	NA	NA	NA	NA	0.00236874219069191	NA	NA	NA	NA	NA	NA	NA	NA	NA
E7EPN9	NA	NA	NA	NA	NA	NA	NA	NA	NA	NA	NA	NA	NA	NA	NA	0.000542106608159049	NA	NA	NA	NA	NA	NA	NA	NA	NA	NA	NA	NA	NA	NA	NA	NA	NA
E7EPW6	NA	NA	NA	NA	NA	NA	NA	NA	NA	NA	NA	NA	NA	0.0125	NA	NA	NA	NA	NA	NA	NA	NA	NA	NA	NA	NA	NA	NA	NA	NA	NA	NA	NA
E7EQ29	NA	0.00235385684498344	NA	NA	NA	NA	NA	NA	NA	NA	NA	NA	0.00327117598094417	0.010021097	NA	NA	NA	NA	0.00498446645567689	0.00350071834227062	NA	NA	NA	NA	NA	NA	NA	NA	NA	NA	NA	NA	NA
E7EQ72	NA	NA	NA	NA	NA	NA	NA	NA	NA	NA	NA	NA	NA	NA	NA	NA	NA	NA	NA	0.0112593076603381	NA	NA	NA	NA	NA	NA	0.0102457138999765	NA	NA	NA	NA	NA	NA
E7EQB2	NA	NA	NA	NA	NA	NA	NA	NA	NA	0.000509424097116203	NA	0.00505051314654723	NA	NA	NA	NA	0.00270949748662307	NA	0.00226306213302423	NA	NA	NA	NA	NA	0.00212020130118288	NA	NA	0.00255980880164254	NA	0.00200517819092621	NA	NA	NA
E7EQD9	NA	NA	NA	NA	NA	NA	NA	NA	NA	NA	NA	NA	NA	NA	NA	NA	NA	NA	NA	NA	NA	NA	NA	0.00156352618284124	NA	NA	NA	NA	NA	NA	NA	NA	NA
E7EQG2	NA	0.00374531050762446	0.00618812390814615	0.0092183610135052	NA	NA	0.00212199675468345	0.0220210199280554	0.00265911234207075	NA	0.00741884276548482	0.00682432607335235	0.0107220777345295	NA	0.00162949175221482	0.00898843737328373	NA	0.00626247486602015	NA	0.00877294857492974	NA	0.00170463955924931	0.00320927780300124	0.00397573384523547	0.000743031405459294	NA	0.00259066268234921	0.00149120253226972	NA	NA	NA	NA	NA
E7EQJ3	NA	NA	NA	NA	NA	NA	NA	NA	NA	NA	NA	NA	0.0113592483363489	0.008241758	NA	NA	NA	NA	NA	NA	NA	NA	NA	NA	NA	NA	NA	NA	NA	NA	NA	NA	NA
E7EQR4	NA	0.000492493254548059	0.00238392605440308	0.00113641576986492	0.00635596061972047	NA	NA	0.00838356961483887	NA	NA	NA	0.00420642855515538	0.00494984048451616	0.000931099	NA	NA	NA	NA	0.00146656563929191	0.00350202258388344	NA	NA	0.00116052004369627	0.00249225219850209	NA	NA	NA	NA	NA	NA	NA	NA	NA
E7EQR6	0.0103635377591384	NA	0.00916232935118135	NA	0.00934753254390904	0.00434781501532015	NA	0.0138612668700903	NA	NA	NA	0.00689349899086085	0.0145524250504149	0.009536785	NA	0.00286120209793738	NA	NA	NA	0.00964557581829114	NA	NA	0.00555738489595593	0.00516347044948596	NA	NA	0.00556705512333386	NA	NA	0.00507031504801832	NA	0.00555900063808997	0.00632125922597839
E7EQT4	NA	NA	NA	NA	0.00116279120173771	NA	0.00216250235407581	0.00155842835322956	NA	NA	NA	NA	0.00127301911208559	0.000821018	0.000442825726981897	NA	NA	NA	NA	NA	NA	NA	NA	NA	NA	NA	NA	NA	NA	NA	NA	NA	NA
E7EQU1	NA	NA	NA	NA	NA	NA	NA	NA	NA	NA	NA	NA	NA	NA	NA	0.00544073057452431	NA	NA	NA	NA	NA	NA	NA	NA	NA	NA	NA	NA	NA	NA	NA	NA	NA
E7EQV3	NA	NA	NA	NA	NA	NA	NA	NA	NA	NA	NA	NA	NA	0.000978474	NA	NA	NA	NA	NA	NA	NA	NA	NA	NA	NA	NA	NA	NA	NA	NA	NA	NA	NA
E7EQY4	NA	NA	NA	NA	NA	NA	NA	NA	NA	NA	NA	NA	NA	NA	NA	NA	NA	NA	NA	0.00116937263151971	NA	NA	NA	NA	NA	NA	NA	NA	NA	NA	NA	NA	NA
E7ER44	NA	NA	NA	NA	NA	NA	NA	NA	NA	NA	NA	NA	NA	NA	NA	NA	NA	NA	NA	NA	NA	0.000962973171396096	NA	NA	NA	NA	NA	NA	NA	NA	NA	NA	NA
E7ER77	NA	NA	NA	NA	NA	NA	NA	NA	NA	NA	NA	NA	NA	0.00308642	NA	NA	NA	NA	NA	NA	NA	NA	NA	NA	NA	NA	NA	NA	NA	NA	NA	NA	NA
E7ER83	NA	NA	NA	NA	0.0108944603692691	NA	NA	NA	NA	NA	NA	NA	NA	NA	NA	NA	NA	NA	NA	NA	NA	NA	NA	NA	NA	NA	NA	NA	NA	NA	NA	NA	NA
E7ERA2	NA	NA	NA	NA	0.0214587849749871	NA	NA	NA	NA	NA	NA	NA	NA	NA	NA	NA	NA	NA	NA	0.0251415226399435	NA	NA	NA	NA	NA	NA	NA	NA	NA	NA	NA	NA	NA
E7ERC4	NA	NA	NA	NA	0.0102628968335377	NA	NA	0.00990347491559061	NA	NA	NA	NA	0.00561788952173833	NA	NA	NA	NA	NA	NA	NA	NA	0.00613299719029697	0.00554228399103677	NA	NA	NA	NA	NA	NA	NA	NA	NA	0.00504326595065561
E7ERC8	NA	0.0326742049637347	NA	NA	0.0503200187633395	NA	NA	0.0158916224330268	0.0153517355636566	NA	NA	0.0378226395047279	0.0240393395265451	0.01910299	0.0250865943039148	NA	0.00589062024170843	NA	0.0183150175	0.0257262089557034	NA	0.00984132010179184	NA	NA	NA	NA	0.0104045619069769	NA	NA	NA	NA	0.00968274008394427	0.0485560915689867
E7ERF2	NA	0.00248560994289639	0.00256675352461611	NA	0.00611315455647731	0.0109975751416748	0.00396079356355544	0.0125592941151221	NA	NA	0.0143604504909699	NA	0.00323838211501113	0.013784461	0.00270356816405977	NA	0.0101572611667487	NA	0.00263173226075975	NA	NA	NA	0.00255584039493017	0.00237467920611866	NA	NA	0.00336388046653323	0.00494825074460468	NA	NA	NA	NA	0.0046514326181755
E7ERK6	NA	0.00593867210930611	0.0109874712258178	0.012180748728526	0.016961434762683	0.0095547796740333	NA	0.00818371003963193	0.0210818252174549	0.0191079875620511	NA	NA	NA	0.005988024	NA	0.0062877906570985	NA	NA	0.00314389532854925	0.00331205686147487	NA	0.00225243794569356	NA	0.019857719122746	0.0117817197665099	NA	NA	0.00591123410841962	NA	NA	NA	NA	0.0111133038985765
E7ERL0	NA	0.0181973989404426	0.00782977467340121	0.00933112402598095	0.021655654475291	0.00365974359074211	NA	NA	0.00605618946900511	NA	NA	0.00994723858386264	0.00189668143210793	0.009174312	0.00989654643615302	0.00481679376025435	0.00697146863385573	NA	0.0144503812807631	NA	NA	0.0207058974457335	NA	0.00869263196198842	0.0090254458761796	NA	0.00410455196958149	NA	NA	NA	NA	0.00763959313959175	0.00425670126390429
E7ERP7	NA	NA	0.0202644575570836	0.00464425799326146	0.0075448699091838	0.017122252125929	0.0192433098893413	NA	0.0221046302667654	0.00485697696411557	NA	NA	0.00944010581951728	0.005479452	NA	0.00739198233459877	NA	0.00540868671832597	NA	0.0101025294230185	NA	0.0136120790790036	NA	0.00746316001533169	0.0157224088574648	0.00456252467186071	NA	0.00563456715076217	NA	NA	NA	NA	0.00847452839112183
E7ES19	NA	NA	0.00311349900311084	NA	NA	NA	NA	NA	NA	NA	NA	NA	NA	NA	NA	NA	NA	NA	NA	NA	NA	NA	NA	NA	NA	NA	NA	NA	NA	NA	NA	NA	NA
E7ESH4	NA	NA	NA	NA	NA	NA	NA	NA	NA	NA	NA	0.00926708593531823	0.00662622776549869	NA	NA	NA	NA	NA	NA	NA	NA	0.00337576916022322	0.00653705202346578	NA	NA	NA	NA	NA	NA	NA	NA	NA	NA
E7ESI2	NA	NA	NA	NA	NA	NA	NA	NA	NA	NA	NA	NA	NA	0.004201681	NA	NA	NA	NA	NA	NA	NA	NA	NA	NA	NA	NA	NA	NA	NA	NA	NA	NA	NA
E7ESM3	NA	NA	NA	NA	0.0153526268406791	NA	NA	0.0111112160256245	NA	NA	NA	0.0264450975927813	0.0084039964172965	NA	NA	NA	NA	NA	NA	0.00899371497522271	NA	NA	NA	NA	NA	NA	NA	NA	NA	NA	NA	NA	0.00754439702254388
E7ESS4	NA	NA	NA	NA	NA	NA	NA	NA	NA	NA	NA	NA	0.00447485506066449	NA	NA	NA	NA	NA	NA	NA	NA	NA	NA	NA	NA	NA	NA	NA	NA	NA	NA	NA	NA
E7ETC2	NA	NA	NA	NA	0.00268999024960422	NA	NA	NA	NA	NA	NA	NA	NA	NA	NA	NA	NA	NA	NA	0.000450234382033296	NA	NA	NA	NA	NA	NA	NA	NA	NA	NA	NA	NA	NA
E7ETK5	NA	NA	NA	NA	NA	NA	NA	NA	NA	NA	NA	NA	NA	NA	NA	NA	NA	NA	NA	0.00496065919047622	NA	NA	NA	NA	NA	NA	NA	NA	NA	NA	NA	NA	NA
E7ETU9	NA	NA	0.00268186112388898	NA	0.00229915556675528	0.00118723804873115	NA	0.00295818065328452	NA	NA	NA	NA	0.0064326049249739	0.004085498	NA	NA	NA	NA	NA	NA	NA	NA	NA	NA	0.00159703542348841	NA	NA	0.00320511692591975	NA	NA	NA	0.00135181142653215	0.000753214701112399
E7ETV3	NA	NA	NA	NA	NA	NA	NA	NA	NA	NA	NA	NA	0.00608053887006455	NA	NA	NA	NA	NA	NA	0.00650721761144154	NA	NA	NA	NA	NA	NA	NA	NA	NA	NA	NA	NA	NA
E7ETZ0	NA	0.0175532430414276	0.0468262097137791	NA	0.020889082652169	0.0335368534261302	0.0233090981470924	0.0423307830160084	NA	NA	NA	NA	NA	0.072271386	NA	0.034847158426178	NA	NA	NA	0.0228424455702833	NA	0.00998647312125803	NA	0.0466760999249684	0.0130589412165427	NA	NA	NA	0.0169811630806136	NA	0.012744959662319	NA	0.0492722583604007
E7EUC9	NA	NA	NA	NA	NA	0.00759832510752755	NA	NA	NA	NA	0.00194891793011207	0.0103261814398046	NA	0	NA	NA	NA	NA	NA	NA	NA	NA	NA	NA	NA	NA	NA	NA	NA	NA	NA	NA	NA
E7EUI8	NA	NA	NA	NA	NA	NA	NA	NA	NA	NA	NA	NA	NA	0.00295858	NA	NA	NA	NA	NA	NA	NA	NA	NA	NA	NA	NA	NA	NA	NA	NA	NA	NA	0.00137272323258267
E7EUT5	0.0142567007921716	0.0259980366374323	0.0428208564784694	0.026712456957991	0.0444174971141785	NA	0.0260415435528275	0.0489911601225379	0.0237063047800538	NA	0.0103786236604076	0.0286501336936641	0.0375522770705984	0.026302101	0.0226147693994505	0.0140394755982252	0.0214571974085212	0.0163822569333752	0.0455093321798699	0.0258877756190074	0.0301607857339092	0.0382408737593918	0.0236484607077848	0.031250580742573	0.024873805299162	0.00975188302584403	0.0382634260388443	0.0216821184226758	0.0212764668710215	NA	0.0186269591501773	0.0296168059890577	0.0200536584379187
E7EUU4	NA	NA	0.000493321501306518	NA	NA	NA	NA	0.000841191272679176	NA	NA	NA	0.00121864816563508	0.00130290313617145	0.001119942	NA	NA	NA	NA	NA	NA	NA	NA	0.000982447048283051	NA	NA	NA	NA	NA	NA	NA	NA	0.00120334655408637	NA
E7EVA0	NA	NA	0.000291024209751104	0.000645691009489731	NA	NA	NA	0.000710817331070502	0.000650489467495275	NA	NA	0.000496269439903788	0.000837226105155938	0.00131651	0.000146094766941381	NA	0.000514569189568086	NA	NA	NA	NA	NA	0.000388438350035663	NA	NA	NA	0.000302959679246328	NA	NA	NA	NA	0.000470491001463048	0.000386192258362881
E7EVQ6	NA	NA	0.00259274605871056	NA	NA	NA	NA	NA	NA	NA	NA	NA	NA	NA	NA	NA	NA	NA	NA	NA	NA	NA	NA	NA	NA	NA	NA	NA	NA	NA	NA	NA	NA
E7EVW7	NA	NA	NA	NA	NA	NA	NA	NA	NA	NA	NA	NA	0.00173438151437283	0.006711409	NA	NA	NA	NA	NA	NA	NA	NA	NA	NA	NA	NA	NA	NA	NA	NA	NA	NA	NA
E7EW20	NA	NA	NA	NA	NA	NA	NA	NA	NA	NA	NA	NA	NA	0.000422297	NA	NA	NA	NA	NA	NA	NA	NA	NA	NA	NA	NA	NA	NA	NA	NA	NA	NA	NA
E7EWR4	NA	NA	NA	NA	NA	NA	NA	NA	NA	NA	NA	0.00463607197844454	0.00338545265443918	NA	NA	NA	0.00105342750549383	NA	0.00229270955618294	NA	NA	NA	0.0011132970828581	NA	NA	NA	NA	NA	NA	NA	NA	NA	NA
E7EX17	NA	NA	NA	NA	0.000835563532691525	NA	NA	NA	NA	NA	0.000482918202528294	0.00143926898303994	0.0018295431628455	0.006342183	0.00095462288048981	NA	NA	NA	NA	NA	NA	NA	NA	NA	NA	NA	NA	NA	NA	NA	NA	NA	0.00328481722402672
E7EX44	NA	NA	NA	NA	NA	NA	NA	NA	NA	NA	NA	NA	NA	0.002548846	NA	NA	NA	NA	NA	NA	NA	NA	NA	NA	NA	NA	NA	NA	NA	NA	NA	NA	NA
E7EX90	NA	NA	NA	NA	NA	0.000515199697194354	NA	0.000630387327510224	NA	NA	NA	NA	0.00127145306931526	0.001230012	NA	NA	NA	NA	NA	NA	NA	NA	NA	NA	NA	NA	NA	NA	NA	NA	NA	NA	NA
E8ZWG7	NA	NA	NA	NA	NA	NA	NA	NA	NA	NA	NA	NA	NA	NA	NA	NA	NA	NA	NA	NA	NA	0.0126794538890151	NA	NA	NA	NA	NA	NA	NA	NA	NA	NA	NA
E9LUX2	NA	NA	0.0288488596060676	NA	0.0265968035137081	NA	NA	NA	NA	NA	NA	NA	NA	NA	NA	NA	NA	NA	NA	NA	NA	NA	NA	NA	NA	NA	NA	NA	NA	NA	NA	NA	NA
E9NGZ5	NA	NA	NA	NA	NA	NA	NA	NA	NA	NA	NA	NA	NA	NA	0.0561237632087111	NA	NA	NA	0.0362763156412286	NA	NA	NA	NA	NA	NA	0.04870133204518	NA	NA	NA	NA	0.0423535464673337	0.0359236010984523	NA
E9PAU3	NA	NA	NA	NA	NA	0.0419907419577375	0.0970394549499631	NA	NA	NA	NA	NA	NA	NA	NA	NA	NA	NA	NA	NA	NA	NA	NA	NA	NA	NA	NA	NA	NA	NA	NA	NA	NA
E9PAV3	NA	NA	NA	NA	0.00063064767479971	0.000270632305211858	NA	NA	NA	NA	NA	NA	0.000717714817410815	0.001017639	0.000365917052553562	0.000237462901748151	NA	NA	0.000474925803496301	NA	NA	NA	NA	NA	NA	NA	NA	NA	NA	NA	NA	NA	NA
E9PB61	NA	0.0112699795748158	0.0187499377303555	NA	0.0169882043391127	NA	0.00798160065134196	0.0163932521452947	0.00611226485733872	NA	0.00310055192217019	0.00205350146106675	0.00717841341262358	0.011805556	NA	0.00397750412931204	0.00959457168488386	NA	0.0238650237258112	0.00628538038342914	NA	0.0128235382460638	0.0135198132519281	0.00179450128635874	0.00372641533229056	NA	0.0169468243385182	NA	NA	NA	NA	0.00473133874378906	NA
E9PBF6	NA	NA	0.0064373327054829	NA	NA	NA	NA	NA	NA	NA	NA	NA	0.00639141128111898	NA	NA	0.00354816147518599	NA	NA	NA	NA	NA	NA	NA	NA	NA	NA	NA	NA	NA	NA	NA	NA	NA
E9PBS1	NA	0.00289142352776487	0.00821099133784482	NA	0.00321151923159929	0.0023260178574952	NA	0.0105146221281751	0.0104781690812946	NA	NA	0.00316107590670554	0.00301367823553048	0.00728863	NA	NA	NA	NA	0.00612280506785515	NA	NA	0.00658000841043541	0.0029731201680428	NA	NA	NA	NA	NA	NA	NA	NA	NA	0.0040581380532684
E9PBT8	NA	NA	NA	NA	NA	NA	NA	NA	0.00313784705828627	NA	NA	NA	NA	NA	NA	NA	NA	NA	NA	NA	NA	NA	NA	NA	NA	NA	NA	NA	NA	NA	NA	NA	NA
E9PBW4	NA	NA	NA	NA	NA	NA	NA	NA	NA	NA	NA	NA	NA	NA	0.0351757684049111	NA	NA	NA	0.0199739868721244	NA	NA	NA	NA	0.0231724781995939	NA	0.0217215846335993	NA	NA	NA	NA	0.0156541357383458	NA	NA
E9PC52	NA	NA	NA	NA	0.00824617011765499	NA	NA	NA	NA	NA	NA	NA	NA	NA	NA	NA	NA	NA	NA	NA	NA	0.00492782245888292	NA	NA	NA	NA	NA	NA	NA	NA	NA	NA	NA
E9PC84	0.00102006384249136	0.00557483865873816	0.00401284887585491	0.00407608062110432	0.00463431296580678	0.00391987254172487	0.00786707113754218	NA	0.00829588061462826	0.00159506594920964	0.00247207911154797	0.00391438283507532	NA	0.000971594	0.000512701123845253	0.0010191451344504	0.00318453111536848	0.00327994282595859	0.00321789627961052	0.00420368687194823	0.00147588004236907	0.000619431494085466	NA	0.00109429256731832	NA	0.000949802807433437	NA	0.00150114438265407	0.0032446597276801	NA	0.00149556693317983	0.00244492308346011	NA
E9PCB3	NA	NA	0.018620627433572	0.0369851818372458	0.0128752711738296	0.0217588387751167	0.0191558402989352	0.0331316255034739	0.0160030215815591	0.00966979959219372	NA	0.0394272358590744	NA	0.013636364	NA	0.0286380278409368	NA	NA	0.0286380278409368	0.010056608834732	NA	0.0205176616450907	0.0278121864744216	NA	0.0089433962072332	NA	0.0203361893851803	0.0269229839546429	NA	NA	NA	0.0378507107830282	0.0253080234225775
E9PCX2	NA	NA	NA	NA	0.00621175312299178	NA	NA	NA	NA	NA	NA	NA	0.00680060223478506	NA	NA	NA	NA	NA	NA	NA	NA	NA	NA	NA	NA	NA	NA	NA	NA	NA	NA	NA	NA
E9PCY5	NA	NA	0.000999155878167251	NA	NA	NA	NA	NA	NA	NA	NA	NA	NA	NA	NA	NA	NA	NA	NA	NA	NA	NA	NA	NA	NA	NA	NA	NA	NA	NA	NA	NA	NA
E9PCY7	NA	0.0061034358800484	NA	0.00191542828274909	NA	NA	NA	0.0154427073738468	0.00568307469628408	NA	0.00187184203352313	NA	NA	0.00462963	0.00380905161214772	NA	0.00858632825643696	0.00111535115286202	0.0111235275183581	0.00937480463969092	NA	0.00535090331447554	NA	0.00446090814820487	0.00416853203878234	NA	NA	0.00172629654332444	0.0016678593673642	NA	NA	NA	0.0071151158292313
E9PD53	NA	NA	NA	NA	NA	NA	NA	0.00117311582767741	NA	NA	NA	NA	NA	NA	NA	NA	NA	NA	NA	NA	NA	NA	NA	NA	NA	NA	NA	NA	NA	NA	NA	NA	NA
E9PDQ8	NA	NA	NA	NA	0.00140503925074308	NA	NA	NA	NA	NA	NA	NA	0.0046146949273675	NA	NA	NA	NA	NA	NA	NA	NA	NA	NA	NA	NA	NA	NA	NA	NA	NA	NA	NA	NA
E9PDU6	NA	NA	0.00526096468667077	NA	NA	NA	NA	NA	NA	NA	NA	NA	0.00354004019916478	NA	NA	NA	NA	NA	NA	NA	NA	0.007729256099178	NA	NA	NA	NA	NA	NA	NA	NA	NA	NA	NA
E9PEB5	NA	0.00170054602570744	0.00240831172143708	NA	0.00589307128620662	0.00155041236435664	0.00325176330636682	0.0124462350924909	NA	NA	0.00140354223796561	NA	0.00106346915142537	0.00264142	0.00821250471259105	NA	0.00138983084170127	NA	NA	0.00772639147550365	NA	0.00212846069208148	0.00316899036717355	NA	0.00202422533325916	NA	0.00398912912877027	0.00252210657248168	NA	NA	NA	0.00376949471579491	0.00716019152839962
E9PEF9	NA	NA	NA	NA	NA	NA	NA	0.0132046338282006	NA	NA	NA	NA	NA	NA	NA	NA	NA	NA	NA	NA	NA	NA	NA	NA	NA	NA	NA	NA	NA	NA	NA	NA	NA
E9PEJ4	NA	NA	0.00233288011756818	NA	NA	NA	NA	NA	NA	NA	NA	NA	NA	NA	NA	NA	NA	NA	NA	NA	NA	NA	NA	NA	NA	NA	NA	NA	NA	NA	NA	NA	NA
E9PEW8	0.100893564805913	0.0711591055542188	0.0178738981834004	0.0234962151574107	0.0397565901906362	NA	NA	0.0321749580075718	0.0295151886720314	0.0414576028638787	0.0204608020054592	0.0312764135408567	0.0149090135060637	NA	NA	0.0461677403976765	0.0213410689808845	NA	NA	NA	NA	NA	0.0568032918665637	0.0880685498441608	0.0764085262168072	NA	NA	NA	0.032211663657029	NA	NA	NA	NA
E9PEX6	NA	NA	0.00268801719648322	NA	NA	NA	NA	0.00358708558902583	0.00231014756942974	NA	NA	NA	0.00286382913308816	0.00656168	NA	0.001378032893618	NA	NA	NA	0.00290348298761694	NA	NA	NA	0.00746060556375325	NA	NA	NA	NA	NA	NA	NA	NA	NA
E9PF17	NA	NA	0.000955094538752537	NA	0.00332087963615499	NA	NA	NA	0.00602731121612132	NA	NA	NA	NA	NA	NA	NA	NA	NA	0.000908053927640315	0.00177697001432205	NA	NA	NA	NA	NA	NA	NA	NA	NA	NA	NA	NA	NA
E9PFD2	NA	NA	NA	NA	NA	NA	NA	NA	NA	NA	NA	NA	NA	0	NA	NA	NA	NA	NA	NA	NA	NA	NA	NA	NA	NA	NA	NA	NA	NA	NA	NA	NA
E9PFF2	NA	NA	NA	NA	NA	NA	NA	NA	NA	NA	NA	NA	0.00344563831401633	0.006666667	NA	NA	NA	NA	NA	NA	NA	NA	NA	NA	NA	NA	NA	NA	NA	NA	NA	NA	NA
E9PFL9	NA	NA	NA	NA	NA	NA	NA	NA	NA	NA	NA	NA	NA	NA	NA	NA	NA	NA	NA	0.00825542572420864	NA	NA	NA	NA	NA	NA	NA	NA	NA	NA	NA	NA	NA
E9PFN5	NA	NA	NA	NA	NA	NA	NA	NA	NA	NA	NA	NA	0.00544048220130469	NA	NA	NA	NA	NA	NA	NA	NA	NA	NA	NA	NA	NA	NA	NA	NA	NA	NA	NA	NA
E9PFP8	NA	NA	NA	NA	NA	NA	0.00125425126000685	NA	NA	NA	NA	NA	NA	NA	NA	NA	NA	NA	NA	NA	NA	NA	NA	NA	NA	NA	NA	NA	NA	NA	NA	NA	NA
E9PFT6	NA	NA	0.00242112159600183	NA	NA	NA	NA	NA	NA	NA	NA	NA	NA	NA	NA	NA	NA	0.0376640659171268	NA	NA	NA	NA	NA	NA	NA	NA	NA	NA	NA	NA	NA	NA	0.0111984368845384
E9PFZ2	NA	0.00356747536335382	0.00306994768268664	0.00355697796258822	0.00370768736346384	0.00143493530464382	NA	NA	0.00204078150687096	NA	NA	0.00173341164068014	NA	0.001798561	NA	NA	0.0012148524739086	NA	0.00188859881857884	0.00375816501686202	NA	0.00340525950336554	NA	NA	0.00117958487228473	NA	NA	0.00245117204748736	NA	NA	0.00211057584146248	0.000776579785740059	NA
E9PG15	NA	0.00732170475277952	0.0189018117588637	0.0147899358128203	0.0282213330855825	NA	0.00353547423422336	0.0189005916323313	0.00728804895264047	NA	NA	0.0157664842692595	0.0242813463696776	NA	0.0217192659632779	NA	NA	NA	0.00704738905625074	0.0239228797648332	NA	0.0151472673725639	0.0117704547955017	0.00914111918590838	0.00770292558730039	NA	0.0120106353836202	0.00946477582184871	NA	NA	NA	0.0183096317033835	0.0138398338814454
E9PGC8	NA	NA	NA	NA	NA	NA	NA	NA	NA	NA	0.00139567683270316	NA	NA	NA	NA	NA	NA	NA	NA	NA	NA	NA	NA	NA	NA	NA	NA	NA	NA	NA	NA	NA	NA
E9PGM4	NA	NA	NA	NA	NA	NA	NA	NA	NA	NA	NA	NA	NA	NA	NA	NA	NA	NA	NA	0.00321577639601967	NA	NA	NA	NA	NA	NA	NA	NA	NA	NA	NA	NA	NA
E9PGN7	NA	NA	0.00368393680957015	0.00975628293474669	0.00188686330088081	0.00382649441165822	NA	0.00436987864386328	0.00729953952232648	NA	NA	NA	NA	NA	NA	NA	NA	NA	0.00503626386623058	0.00530564492490408	NA	NA	NA	0.00568043706264195	0.00196597413129215	NA	NA	0.00473465742875115	NA	NA	NA	0.00299537976836569	NA
E9PGT1	NA	NA	0.00229626526024175	NA	0.00423402036651118	NA	NA	NA	NA	NA	NA	0.0072931542553919	NA	0.004484305	NA	NA	NA	NA	NA	NA	NA	NA	0.00914601072846005	NA	NA	NA	NA	NA	NA	NA	NA	NA	NA
E9PGT6	NA	NA	NA	NA	0.00352308379033962	NA	NA	NA	NA	NA	NA	NA	NA	NA	NA	NA	NA	NA	NA	NA	NA	NA	NA	NA	NA	NA	NA	NA	NA	NA	NA	NA	NA
E9PGV7	NA	NA	NA	NA	NA	NA	NA	NA	NA	NA	NA	NA	NA	NA	NA	NA	NA	NA	NA	NA	0.113915402612409	NA	NA	NA	NA	NA	NA	NA	NA	NA	NA	NA	NA
E9PGX9	NA	NA	0.00853445398435352	NA	NA	NA	NA	NA	NA	NA	NA	NA	NA	NA	NA	NA	NA	NA	NA	NA	NA	NA	NA	NA	NA	NA	NA	NA	NA	NA	NA	NA	NA
E9PHH3	NA	NA	NA	NA	NA	NA	NA	NA	NA	NA	NA	0.00752950644149375	NA	0.020833333	NA	NA	NA	NA	NA	NA	NA	NA	NA	NA	NA	NA	NA	NA	NA	NA	NA	NA	NA
E9PHH9	NA	NA	NA	NA	NA	NA	NA	0.00221683625631517	NA	NA	NA	NA	NA	NA	NA	NA	NA	NA	NA	NA	NA	NA	NA	NA	NA	NA	NA	NA	NA	NA	NA	NA	NA
E9PHI6	NA	NA	NA	NA	NA	NA	NA	NA	NA	NA	NA	NA	NA	0.002824859	NA	NA	NA	NA	NA	NA	NA	NA	NA	NA	NA	NA	NA	NA	NA	NA	NA	NA	NA
E9PHK0	NA	NA	0.020802732418971	NA	0.0118023315946149	NA	NA	0.0170834945710637	0.00550103872367133	NA	0.00383693278881738	NA	NA	NA	NA	NA	NA	NA	NA	0.0138278372860349	NA	NA	NA	0.0177655664301893	0.00768573119244834	NA	NA	NA	NA	NA	NA	NA	NA
E9PHT9	0.0475010650834148	0.0380275393796286	0.0777600238806306	0.0368150049696338	0.0349139377465886	0.024228400346212	NA	0.0446421151419739	0.0285739028554423	0.0163140788969181	0.0338808875952707	0.045675928718692	0.0501874708999456	0.048464266	0.0352956577405817	0.0246946863972182	0.0300433706473828	0.0268874784517228	0.0359683484916536	0.0358562325441544	NA	0.0317310461139036	0.0490078412976363	0.0295971674260731	0.0261534901182708	0.0132817058510406	0.0263497127699812	0.0358907580774743	0.0334149855238484	NA	0.0132531945504859	0.0382299919416868	0.0443106056401343
E9PHY5	NA	NA	NA	NA	NA	NA	NA	NA	0.00107599789335294	NA	0.00300200148014881	NA	0.0012636817758847	0.003056235	NA	NA	NA	NA	NA	NA	NA	NA	NA	NA	NA	NA	NA	NA	NA	NA	NA	NA	NA
E9PHZ5	NA	NA	NA	NA	NA	NA	NA	NA	NA	NA	NA	NA	0.0267735437332975	NA	NA	NA	NA	NA	NA	NA	NA	NA	NA	NA	NA	NA	NA	NA	NA	NA	NA	NA	NA
E9PI03	NA	NA	NA	NA	NA	NA	0.0119723999234417	NA	NA	NA	NA	NA	NA	NA	NA	NA	NA	NA	NA	NA	NA	NA	NA	NA	NA	NA	NA	NA	NA	NA	NA	NA	NA
E9PI04	NA	NA	NA	NA	0.00821031746683013	0.0138752013990036	NA	0.00792277993247249	0.00765361894073121	NA	NA	NA	0.00898862240782805	0.008695652	NA	NA	NA	NA	NA	NA	NA	NA	NA	NA	NA	NA	NA	NA	NA	NA	NA	0.00724100546869098	0.0161384495573606
E9PI39	NA	NA	NA	NA	NA	NA	NA	NA	NA	NA	NA	0.00618811586815702	NA	NA	NA	NA	NA	NA	0.0120105014707944	0.0147445288688055	NA	0.00829758363736315	NA	NA	NA	NA	NA	NA	NA	NA	NA	NA	0.0103702438732438
E9PI41	NA	NA	NA	NA	NA	NA	NA	NA	NA	NA	NA	0.00619570886388278	NA	NA	NA	NA	NA	NA	NA	NA	NA	NA	NA	NA	NA	NA	NA	NA	NA	NA	NA	NA	NA
E9PI47	NA	NA	NA	NA	NA	0.00524884244553315	NA	NA	NA	NA	NA	NA	NA	NA	NA	NA	NA	NA	NA	NA	NA	NA	NA	NA	NA	NA	NA	NA	NA	NA	NA	NA	NA
E9PI65	NA	0.00442749240085974	NA	0.00403608142393621	0.0103966059202663	0.00593619104147984	NA	0.0155222326355346	0.00826403180083369	NA	0.00487229564382583	NA	0.0186345765383946	0.011787557	NA	0.00468777276133423	NA	NA	0.00234388638066711	0.0222821017792818	NA	0.0100756370321257	NA	0.00992835549303482	0.00424545132844316	NA	0.00779972929341313	0.0117520963822152	0.00527162376601566	NA	NA	0.00413053357280637	NA
E9PIC4	NA	0.022799040120216	0.0235433225368571	NA	0.0217054376541436	NA	NA	NA	0.0101168529364281	NA	NA	NA	0.0237630254929808	0.022988506	NA	NA	0.0116458250324896	NA	NA	NA	NA	NA	0.0234432228079121	NA	NA	NA	0.0205699386678883	NA	NA	NA	NA	NA	NA
E9PIE4	NA	NA	NA	NA	NA	NA	NA	NA	NA	NA	NA	NA	NA	NA	NA	0.00300017452525146	NA	NA	NA	NA	NA	NA	NA	NA	NA	NA	NA	NA	NA	NA	NA	NA	NA
E9PIG2	0.0197580187799978	0.0192340986991508	0.0466032935219509	NA	0.0313548039704399	0.045733855773081	0.0287337604484029	0.0214435249219767	0.0193814374248104	0.00859537741528331	0.0272848551142972	0.0186184169334518	0.0427050363841764	0.03979798	0.0228820145298957	0.00965207594508742	0.0288604710445351	0.0227328741767216	0.026958637931936	0.0265781807288404	NA	0.0387555831073935	0.02492795952497	0.0406480262584205	0.0207188680276563	NA	NA	0.041481338636098	0.0143132594025951	NA	0.0145057137467546	0.0141870072637786	0.0161221480687905
E9PIJ1	NA	NA	NA	NA	NA	NA	NA	0.0046545069746917	NA	NA	NA	NA	0.003960504593394	0.009578544	NA	NA	NA	NA	NA	NA	NA	NA	NA	NA	NA	NA	NA	NA	NA	NA	NA	NA	NA
E9PIK5	NA	0.00670106939204967	0.0138396561615763	0.00687224694128726	0.0159490968515539	0.0107814070962278	NA	0.00615621448146649	0.00594706910454997	NA	NA	0.014652014	0.0069844029377497	0.013513514	NA	0.00709500722389972	NA	NA	0.00709500722389972	0.0037372529019776	NA	0.00571860556449795	0.0137808137518741	0.00640200615126115	NA	NA	0.0120917885732831	0.00333505397853022	NA	NA	NA	NA	0.00627000609131108
E9PIL8	NA	0.0170992795942829	0.0353149838052856	NA	NA	NA	NA	0.00628358446138979	NA	NA	NA	NA	NA	NA	NA	NA	NA	NA	NA	0.0190728786719087	NA	NA	0.00879120880791207	NA	NA	NA	NA	NA	NA	NA	NA	NA	NA
E9PIM6	NA	NA	0.00336886387304183	NA	NA	NA	NA	NA	NA	NA	0.0053851685248409	NA	NA	NA	NA	NA	NA	NA	NA	NA	NA	NA	NA	NA	NA	NA	NA	0.0194837384791525	NA	NA	NA	NA	NA
E9PIM9	NA	NA	NA	NA	NA	NA	NA	NA	NA	NA	NA	NA	NA	NA	NA	NA	NA	NA	NA	NA	NA	NA	NA	NA	NA	NA	NA	NA	NA	NA	NA	0.00752453931699253	NA
E9PIT3	NA	NA	NA	0.00142052022087741	0.000439565093723311	0.00495235345918109	0.00196195717816317	0.00339336969402649	0.0024585647140282	NA	NA	NA	NA	NA	NA	NA	NA	0.00606588774017756	NA	NA	NA	0.00315215465266374	0.00189903159358096	NA	NA	NA	NA	NA	NA	NA	NA	NA	NA
E9PIZ1	NA	NA	NA	NA	NA	NA	NA	NA	NA	NA	NA	NA	NA	NA	NA	0.0134131887473671	NA	NA	NA	NA	NA	NA	NA	NA	NA	NA	NA	NA	NA	NA	NA	NA	NA
E9PJ04	NA	NA	NA	NA	NA	NA	NA	NA	NA	NA	NA	0.007326007	0.00291016746002421	NA	NA	NA	NA	NA	NA	0.00654019313157429	NA	NA	NA	NA	NA	NA	NA	NA	NA	NA	NA	NA	0.00627000609131108
E9PJ32	NA	NA	NA	0.011176840788047	NA	NA	NA	NA	NA	NA	NA	NA	NA	NA	NA	NA	NA	NA	NA	0.0121563404833958	NA	NA	NA	NA	NA	NA	NA	NA	NA	NA	NA	NA	NA
E9PJ81	NA	NA	NA	NA	NA	NA	NA	NA	NA	NA	NA	NA	NA	NA	NA	NA	NA	NA	NA	NA	NA	NA	NA	NA	NA	NA	0.00894792322210426	NA	NA	NA	NA	NA	0.0037118434724298
E9PJ95	NA	NA	NA	NA	0.00510371057705517	NA	NA	NA	NA	NA	NA	NA	NA	NA	NA	NA	NA	NA	NA	NA	NA	NA	NA	NA	NA	NA	NA	NA	NA	NA	NA	NA	NA
E9PJD9	NA	0.0163476627235464	0.0236338734386312	NA	0.028533109142105	0.0131509462581816	NA	0.0300369135615775	0.0290164680220081	NA	0.0179900145589653	0.0371345349740398	NA	0.032967033	0.0118541049888969	NA	NA	NA	0.0115391322240112	NA	NA	0.0124007846471777	0.0173698821689767	0.010412053595871	0.0108106988309578	NA	NA	0.010848088892262	NA	NA	NA	0.0183014427777251	0.0128074143143369
E9PJF0	NA	NA	NA	NA	NA	NA	NA	0.00288329025756382	0.00557067219208486	NA	0.00518066880656279	NA	NA	0.006329114	NA	NA	NA	NA	NA	NA	NA	NA	NA	NA	NA	NA	NA	NA	NA	NA	NA	NA	NA
E9PJF4	NA	NA	NA	NA	0.00800158048606124	NA	NA	NA	NA	NA	NA	NA	NA	NA	NA	NA	NA	NA	NA	0.00937480463969092	NA	NA	0.00864220464655616	NA	NA	NA	NA	NA	NA	NA	NA	NA	NA
E9PJH4	0.00944948660476724	0.0273503515531141	0.0967308838129057	0.0206366595635912	0.136154434472221	0.0159950240122567	0.0183229774940126	0.0462822399551613	0.0229608577023598	NA	0.0344026441523512	0.0357491293126712	0.0636694101003708	0.054710145	0.0390841866371352	0.0229795965132741	0.0323045056337066	0.0154500310365439	0.042306806693636	0.0451628604148903	NA	0.0286206516739335	0.0183687109660861	0.0460016602784721	0.0156833471431957	NA	0.0464254567435204	0.0751112245749611	NA	NA	0.0292210534422536	0.0202144737388816	0.0266732710024067
E9PJH8	NA	NA	NA	NA	NA	NA	NA	NA	NA	NA	NA	NA	NA	NA	NA	NA	NA	NA	NA	NA	NA	NA	NA	NA	NA	0.00999192913129425	0.0553350935917419	NA	NA	NA	NA	NA	NA
E9PJL7	NA	0.0234890112826236	0.0581241258122335	0.0267655919049347	NA	0.0167962971022246	NA	NA	0.00926490750937618	NA	NA	NA	NA	NA	NA	NA	NA	NA	NA	0.0232889895791017	NA	NA	NA	NA	NA	NA	NA	NA	NA	NA	NA	NA	NA
E9PJM9	NA	NA	NA	NA	NA	NA	NA	NA	NA	NA	NA	NA	NA	NA	NA	0.0201934811295044	NA	NA	NA	NA	NA	NA	NA	NA	NA	NA	NA	NA	NA	NA	NA	NA	NA
E9PJT3	NA	NA	NA	NA	0.00464001018731413	NA	NA	NA	NA	NA	NA	NA	NA	0.009375	NA	NA	NA	NA	NA	NA	NA	NA	NA	NA	NA	NA	NA	NA	NA	NA	NA	NA	NA
E9PK01	NA	NA	NA	NA	NA	NA	NA	NA	NA	NA	NA	0.00415421112346145	NA	NA	NA	0.00201161136827767	NA	NA	NA	0.00635762585522725	NA	0.00216182282060326	NA	NA	NA	NA	NA	NA	NA	NA	NA	NA	0.00177770298668125
E9PK17	NA	NA	NA	NA	0.0257505414034726	NA	NA	NA	0.0160030215815591	NA	NA	NA	NA	NA	NA	NA	NA	NA	NA	NA	NA	NA	NA	NA	NA	NA	NA	NA	NA	NA	NA	NA	NA
E9PK25	NA	0.0170154601553511	0.0197384159820268	0.0216049062064603	0.0521455816981044	0.0138185215817231	0.0154936941425212	0.0234479336177988	0.020853610445214	NA	0.0190592742083668	0.0249507194859725	0.0259229034122799	0.04877451	0.0105757215723012	0.0238555532253696	NA	0.017419152569564	0.0271952082818075	0.0387269822753479	NA	0.00968051405551177	0.0239115119856746	0.0289623520989427	0.0120560489679101	NA	0.0206518649581176	0.0181466193266109	NA	0.00456079853021978	0.0117661803690725	0.024763765853671	0.0197115870069909
E9PK45	NA	NA	NA	0.0143252465865339	0.0332460048642283	NA	NA	NA	NA	NA	NA	NA	0.029118073083746	0.030516432	NA	0.0764128918973766	NA	NA	NA	NA	NA	0.0119204722359732	0.0287262021934437	NA	NA	NA	0.0409588035822848	0.0625674988543222	NA	NA	0.0101421157335287	0.0312757046259259	0.0261397426851709
E9PK47	NA	NA	0.000962984471087589	NA	0.000443905519190547	NA	NA	0.00154209288794078	NA	NA	NA	NA	0.00194394284564061	NA	NA	NA	NA	NA	NA	NA	NA	NA	NA	NA	NA	NA	NA	NA	NA	NA	NA	NA	NA
E9PK54	NA	0.0104195260619634	0.0168409089972606	0.00413753436769303	0.0408673680449432	0.00818749905494004	NA	0.0293234394054313	0.0121628679114992	NA	NA	0.0274994072221951	0.0225002089169633	0.03034188	0.0172701753054816	0.0081607656175921	NA	NA	0.0062118617939837	0.0314841469510559	NA	NA	NA	0.0180144700695997	NA	NA	0.0171974037700147	0.0139531742779875	NA	0.00254208390809468	0.00961869174197781	NA	NA
E9PK67	NA	NA	NA	NA	NA	NA	NA	NA	NA	NA	NA	NA	0.00252008119446449	NA	NA	NA	NA	NA	NA	NA	NA	NA	NA	NA	NA	NA	NA	NA	NA	NA	NA	NA	NA
E9PK68	NA	NA	0.0069669013998235	NA	NA	NA	NA	NA	NA	NA	NA	NA	0.00937588772901799	NA	NA	NA	NA	NA	NA	NA	NA	NA	NA	NA	NA	NA	NA	NA	NA	NA	NA	NA	NA
E9PK85	NA	NA	NA	NA	NA	NA	NA	NA	NA	NA	NA	0.00326581002281657	NA	NA	NA	NA	NA	NA	NA	NA	NA	NA	NA	NA	NA	NA	NA	NA	NA	NA	NA	NA	NA
E9PK86	NA	NA	0.0215698398978033	NA	0.0109581702994034	0.0152889369217579	NA	NA	NA	NA	NA	NA	NA	NA	0.00436730183801463	NA	NA	NA	NA	0.00958111597199856	NA	0.00609161388705146	NA	0.0115080592375416	NA	NA	NA	0.00399666432872811	NA	NA	NA	0.0028094318665666	NA
E9PKA1	NA	NA	NA	NA	0.00562015794715886	NA	NA	NA	NA	NA	NA	NA	NA	NA	NA	NA	NA	NA	NA	NA	NA	NA	NA	NA	NA	NA	NA	NA	NA	NA	NA	NA	NA
E9PKD5	NA	NA	NA	NA	NA	NA	NA	NA	NA	NA	NA	0.00390017592046806	0.00371831478684879	NA	NA	NA	NA	NA	0.00188859881857884	NA	NA	NA	NA	NA	NA	NA	NA	NA	NA	NA	NA	NA	NA
E9PKE3	NA	0.0026083112634047	0.00384965508850731	0.00277968840441717	0.00390238240219472	0.00242837709341503	NA	0.00408149467758836	0.00284362422219225	NA	0.00207814746353076	NA	0.0116350868717783	0.006574772	0.00468915195470823	0.0019584709296649	NA	0.00141517595465669	0.00256633130954511	0.00993276119286338	0.00782572819699289	0.00382759556783299	0.0035014448248367	0.00309760605776156	NA	0.00144958911065164	0.00658144180816164	0.003544934525116	NA	NA	0.00172064601839495	0.0071480710717846	0.00671364191129242
E9PKH2	0.0263563122556289	0.0123353014761666	0.0721802594319165	NA	0.0176154198958847	0.0329307991164861	NA	NA	NA	NA	NA	0.00539427320678663	0.0154282326607587	0.009950249	NA	0.0130604606462093	NA	0.0142415294301951	0.020461388450734	0.0310408353374815	NA	0.00561428515423321	0.0165373020160826	0.0340340565284644	0.0191697177837893	0.00248555432137006	0.00445170275724482	0.00548431203990419	0.0176245364396002	NA	NA	0.0169166941165487	0.00923344169992528
E9PKL7	NA	NA	NA	NA	0.005216500267079	NA	NA	NA	NA	NA	NA	NA	NA	NA	NA	0.00290072114485167	NA	NA	NA	NA	NA	NA	0.0112682895399089	NA	NA	NA	NA	0.00545401165705271	NA	NA	NA	NA	NA
E9PKU4	NA	NA	0.0108950482061427	NA	0.0190846213421087	0.0118824865251406	NA	0.0259766042394967	0.0112361638082757	NA	NA	0.0184553025143481	0.0307908135007723	0.016312057	0.0183612524005204	NA	NA	NA	0.0150806636138454	0.0188293959005223	NA	0.00960401159377194	0.0260369408981024	0.00604785266384017	0.0125588113812933	0.0170075393508129	0.0104709742879236	0.0168029976451762	NA	NA	0.0122568546566772	0.0177173543733269	0.0315901570344739
E9PKU7	NA	NA	NA	NA	NA	NA	NA	NA	NA	NA	NA	NA	NA	NA	NA	NA	NA	NA	NA	NA	NA	NA	NA	NA	NA	NA	NA	NA	NA	NA	NA	NA	0.00335062264102769
E9PKY7	NA	NA	NA	NA	NA	NA	NA	NA	NA	NA	NA	NA	NA	NA	NA	NA	NA	NA	NA	NA	NA	NA	NA	NA	NA	NA	NA	0.0346377571865849	NA	NA	NA	0.0109567850290538	NA
E9PKZ0	NA	0.0219315640690297	0.0158199636330652	0.0148842802970199	0.0207260461877075	0.00518909978154658	NA	0.0182276850812932	NA	NA	NA	NA	0.0212621120418101	0.028455285	0.0096471207400783	0.0102444983276849	NA	NA	NA	0.0268912086719598	NA	NA	0.0149236120555862	NA	NA	NA	NA	0.0128413148883098	NA	NA	NA	0.0101550688888371	0.0196154326297984
E9PL09	NA	0.00876554011008262	0.0168102883992744	0.00385262336231956	0.0149315347563677	0.00645186065706698	0.00456091405586899	0.0163357322468539	0.00777924682218834	NA	0.0106304631484795	0.00859211274423233	0.0121194003286065	0.014766715	0.00466979857544546	0.00321988404514283	0.0100880068116857	NA	0.0126901314220443	0.0133689046412352	NA	0.00793838103393883	0.00607012017312402	0.00563986240390915	0.00647686429917888	NA	0.00629453470317577	0.00783473092147679	NA	NA	0.00519545585538303	0.0133679098498922	0.00613730768717172
E9PLA9	NA	NA	0.00711204481627218	NA	NA	NA	NA	NA	NA	NA	NA	NA	NA	NA	NA	NA	NA	NA	NA	0.00960266527362512	NA	NA	NA	NA	NA	NA	NA	NA	NA	NA	NA	NA	NA
E9PLB2	NA	NA	NA	NA	0.00726297357951274	NA	NA	NA	NA	NA	NA	NA	NA	NA	NA	NA	NA	NA	NA	NA	NA	NA	NA	NA	NA	NA	NA	NA	NA	NA	NA	NA	0.00356908040471494
E9PLD0	NA	NA	0.0103019452786415	NA	NA	NA	NA	NA	NA	NA	NA	NA	NA	NA	NA	NA	NA	NA	NA	NA	NA	NA	NA	NA	NA	NA	NA	NA	NA	NA	NA	NA	NA
E9PLF4	NA	NA	NA	NA	NA	NA	NA	NA	NA	NA	NA	NA	NA	NA	NA	NA	NA	NA	NA	NA	NA	NA	0.0245401646562285	NA	NA	NA	NA	NA	NA	NA	NA	NA	NA
E9PLG2	NA	NA	NA	NA	NA	NA	NA	NA	NA	NA	NA	NA	NA	NA	NA	NA	NA	NA	NA	NA	NA	NA	NA	NA	NA	NA	NA	NA	NA	NA	NA	NA	0.00307271784820774
E9PLH8	NA	NA	NA	NA	NA	NA	NA	NA	NA	NA	NA	NA	NA	0.033333333	NA	NA	NA	NA	NA	NA	NA	NA	NA	NA	NA	NA	NA	NA	NA	NA	NA	NA	NA
E9PLJ0	NA	0.0232443336168763	NA	NA	0.044258743479806	0.018699002259356	NA	0.0431832776398155	0.0137525968091783	NA	NA	0.0240003036796971	NA	0.032552083	NA	NA	NA	NA	0.0246108054219131	NA	NA	NA	NA	NA	NA	NA	NA	NA	NA	NA	NA	NA	0.0253739299873131
E9PLK3	NA	NA	NA	0.00216710070487304	0.00324117046531107	0.00169990944136401	NA	0.00388261273383074	NA	NA	NA	0.00192515782304677	0.0041602169111201	0.002687027	NA	NA	NA	NA	NA	0.00140298675199188	NA	NA	0.0039835163317445	NA	NA	NA	0.0025420235612985	NA	NA	NA	NA	NA	NA
E9PLL6	NA	0.0224982190208238	0.03081886326016	NA	0.0285587286993441	NA	NA	NA	NA	NA	NA	NA	0.0239280460870007	NA	NA	0.0291683622148736	NA	NA	NA	0.0230463951079825	NA	NA	NA	NA	NA	NA	0.0345213088045818	NA	NA	NA	NA	NA	NA
E9PM12	NA	NA	NA	NA	NA	NA	NA	NA	NA	NA	NA	NA	NA	0.00921659	NA	NA	NA	NA	NA	NA	NA	NA	NA	NA	NA	NA	NA	NA	NA	NA	NA	NA	NA
E9PM36	NA	0.00949050942882117	0.0183756196360325	0.00973294269581126	0.0271058333544512	0.0152693607119045	NA	0.0108985606852039	NA	NA	NA	0.0155633827471476	0.0148376784489151	0.019138756	0.00903237452557479	0.0100484309319141	NA	NA	0.00502421546595704	NA	NA	0.0107987694056763	0.0121983270253536	NA	0.00470705068716345	0.00478082734032831	0.00963293148437245	0.00708499536188452	NA	NA	0.00459387711006722	0.0079685707788181	0.0133200124741925
E9PM69	NA	NA	NA	NA	NA	NA	NA	0.00229501214971177	NA	NA	NA	0.00273110612446829	NA	NA	NA	NA	NA	NA	NA	NA	NA	NA	NA	NA	NA	NA	NA	NA	NA	NA	NA	NA	NA
E9PMA0	NA	NA	NA	NA	NA	0.00308437120237324	NA	NA	NA	NA	NA	NA	0.00666038403695733	NA	NA	NA	NA	NA	0.00541268554449941	0.00855330167634345	NA	NA	NA	NA	NA	NA	NA	NA	NA	NA	NA	0.00643852323008033	NA
E9PMC9	NA	NA	NA	NA	NA	NA	NA	NA	NA	NA	NA	NA	NA	NA	NA	NA	NA	NA	NA	NA	NA	NA	NA	NA	NA	NA	NA	0.00107418480144729	NA	NA	NA	NA	0.00302925216114558
E9PMD7	NA	NA	NA	NA	NA	NA	NA	NA	NA	NA	NA	NA	NA	NA	0.00142124309160182	NA	NA	NA	NA	NA	NA	NA	NA	NA	NA	NA	NA	NA	NA	NA	NA	NA	NA
E9PMM9	NA	NA	NA	NA	NA	NA	NA	NA	NA	NA	NA	NA	NA	NA	NA	0.00481679376025435	NA	NA	NA	0.0107831753984085	NA	NA	0.00935578155123701	0.00869263196198842	NA	NA	NA	NA	NA	NA	NA	NA	0.00425670126390429
E9PMV1	NA	NA	NA	NA	NA	NA	NA	NA	NA	NA	NA	NA	NA	0.00398213	NA	NA	NA	NA	NA	NA	NA	NA	NA	NA	NA	NA	NA	NA	NA	NA	NA	NA	NA
E9PN89	NA	NA	NA	NA	NA	NA	NA	NA	NA	NA	NA	0.00987877476519815	NA	NA	NA	NA	NA	NA	NA	NA	NA	NA	NA	NA	NA	NA	NA	NA	NA	NA	NA	NA	NA
E9PNA6	NA	NA	NA	NA	NA	NA	NA	NA	NA	NA	NA	NA	NA	NA	NA	NA	NA	NA	NA	NA	NA	NA	NA	NA	NA	NA	NA	NA	NA	NA	NA	NA	0.00347550854261846
E9PNJ4	NA	NA	NA	NA	0.00214101282106619	NA	NA	NA	NA	NA	NA	NA	NA	NA	NA	NA	NA	NA	NA	NA	NA	NA	NA	NA	NA	NA	NA	NA	NA	NA	NA	NA	NA
E9PNR8	NA	NA	NA	NA	NA	NA	0.0150510172272247	NA	NA	NA	NA	0.0154892710754579	NA	NA	NA	NA	NA	NA	NA	NA	NA	NA	NA	NA	NA	NA	NA	NA	NA	NA	NA	NA	NA
E9PNS3	NA	NA	NA	NA	NA	0.0149592018074848	NA	NA	0.00550103872367133	NA	NA	0.0542124498483518	0.0258422899393515	0.0125	NA	NA	NA	NA	0.013125762891687	NA	NA	NA	NA	NA	NA	NA	0.0111849040276303	0.0123397011026083	NA	NA	NA	NA	0.0115995108513431
E9PP16	NA	NA	NA	0.00049638488019721	NA	NA	NA	NA	NA	NA	NA	NA	NA	NA	NA	NA	NA	NA	NA	NA	NA	NA	NA	NA	NA	NA	NA	NA	NA	NA	NA	NA	NA
E9PP21	NA	NA	0.00960126111644815	NA	0.00590116579730747	NA	NA	NA	NA	NA	NA	0.00677655623104398	NA	NA	NA	NA	NA	NA	NA	NA	NA	NA	NA	NA	NA	NA	0.00559245201381516	NA	NA	NA	NA	0.0052044727847111	NA
E9PP27	NA	NA	0.00882874620735503	NA	NA	NA	NA	NA	NA	NA	NA	NA	NA	0.022988506	NA	NA	NA	NA	NA	NA	NA	NA	NA	NA	NA	NA	NA	NA	NA	NA	NA	NA	NA
E9PP36	NA	NA	NA	0.0206167398067693	NA	NA	NA	NA	NA	NA	NA	NA	NA	NA	NA	NA	NA	NA	NA	NA	NA	NA	NA	NA	NA	NA	NA	NA	NA	NA	NA	NA	NA
E9PP50	NA	NA	NA	NA	NA	NA	NA	NA	NA	NA	NA	NA	NA	NA	NA	NA	NA	NA	NA	0.0263497813623655	NA	NA	NA	NA	NA	NA	NA	NA	NA	NA	NA	NA	NA
E9PP73	NA	NA	0.00273177948861836	NA	NA	NA	NA	NA	NA	NA	NA	NA	NA	NA	NA	NA	NA	NA	NA	0.00223850229253153	NA	NA	0.00112558543403827	0.00435750970909054	NA	NA	NA	NA	NA	NA	NA	NA	NA
E9PP76	NA	NA	NA	NA	NA	NA	NA	NA	NA	NA	NA	0.0159448378080156	0.0152013466583156	0.014705882	NA	NA	NA	NA	0.0154420736196102	NA	NA	NA	NA	NA	NA	NA	NA	NA	NA	NA	NA	NA	NA
E9PPJ0	NA	NA	NA	NA	NA	NA	NA	0.00196741267997908	NA	NA	NA	NA	NA	NA	NA	NA	NA	NA	NA	NA	NA	NA	NA	NA	NA	NA	NA	NA	NA	NA	NA	NA	NA
E9PPM8	NA	NA	NA	NA	NA	NA	NA	NA	NA	NA	NA	NA	NA	0.003636364	NA	NA	NA	NA	0.00381840413214932	0.0040226439763836	NA	0.0041035327804067	NA	NA	NA	NA	0.00650758028113246	NA	NA	NA	NA	NA	NA
E9PPQ4	NA	NA	NA	NA	NA	NA	NA	NA	NA	NA	NA	NA	NA	0.00862069	NA	NA	NA	NA	NA	0.00953643988906786	NA	NA	NA	NA	NA	NA	NA	NA	NA	NA	NA	NA	0.00799966297608521
E9PPR5	NA	NA	NA	NA	NA	NA	NA	NA	NA	NA	NA	NA	NA	0.003164557	NA	NA	NA	NA	NA	NA	NA	NA	NA	NA	NA	NA	NA	NA	NA	NA	NA	NA	NA
E9PPU1	NA	0.0272001200157793	0.0162046603066047	0.0214576474843918	0.0273893772896128	0.0164109384897747	NA	0.0261418312433894	NA	NA	0.0103613376131256	0.0343116775309501	0.0264497935923205	0.021097046	0.0136547286817161	0.0221531858808811	NA	NA	0.0221531858808811	0.0233381215443195	NA	0.0119037065363572	0.0274307958252163	0.0119936314891991	0.00830188728521289	NA	0.011326485227189	0.0218678250012135	NA	NA	NA	NA	0.017619510365373
E9PQ34	NA	NA	NA	0.0143252465865339	NA	NA	NA	NA	NA	NA	NA	NA	NA	NA	NA	NA	NA	NA	NA	NA	NA	NA	NA	NA	NA	NA	NA	NA	NA	NA	NA	NA	NA
E9PQ58	NA	NA	NA	NA	NA	NA	NA	NA	NA	NA	NA	NA	NA	NA	NA	NA	NA	NA	NA	NA	NA	NA	NA	NA	NA	NA	NA	NA	NA	NA	NA	NA	0
E9PQ80	NA	NA	NA	NA	NA	NA	NA	NA	NA	NA	NA	NA	NA	0.003246753	NA	NA	NA	NA	NA	NA	NA	NA	NA	NA	NA	NA	NA	NA	NA	NA	NA	NA	NA
E9PQD6	NA	NA	NA	NA	NA	NA	NA	NA	NA	NA	NA	0.00444364380345882	NA	NA	NA	NA	NA	NA	NA	NA	NA	NA	NA	NA	NA	NA	NA	NA	NA	NA	NA	NA	NA
E9PQD7	NA	0.00844049531581716	0.0174320773346553	0.00216402705130572	0.0110489916014903	0.00678999207213059	NA	NA	NA	NA	NA	0.0115345639359364	0.00879737499059449	0.006382979	0.00573789130774241	NA	NA	NA	0.00372362037315587	0.011768372299548	NA	0.00960401159377194	0.0030376426798702	0.00604785266384017	NA	NA	NA	0.00840149832900003	NA	NA	NA	NA	0.00888473163694699
E9PR30	NA	0.0101199823471771	0.031351056811273	0.0207569897443466	0.0385382260582588	0.0325642492071088	NA	0.0278914198008305	NA	NA	0.0250575203370263	NA	0.0369175573515568	0.040816327	0.0330221496889786	0.021429816687432	NA	NA	0.0321447255561785	0.0225760605816702	NA	0.011515014718262	0.0312177607446692	NA	0.0200770118335578	NA	0.0182610675628189	0.0201464505178649	NA	NA	NA	0.0254912953570254	0.0378759542358775
E9PRC8	NA	NA	NA	NA	NA	NA	NA	NA	NA	NA	NA	NA	NA	NA	0.00558924104470418	NA	NA	NA	NA	NA	NA	NA	NA	NA	NA	NA	NA	NA	NA	NA	NA	NA	NA
E9PRH9	NA	NA	NA	NA	NA	NA	NA	NA	NA	NA	0.006996117136729	NA	NA	NA	NA	NA	NA	NA	NA	0	NA	NA	NA	NA	NA	NA	NA	NA	NA	NA	NA	NA	NA
E9PRQ6	NA	NA	0.00726336581213999	NA	NA	NA	NA	NA	NA	NA	NA	NA	NA	NA	NA	0.00372362037315587	NA	NA	NA	0.00392279039777369	NA	NA	NA	0.00335991772546815	NA	NA	NA	NA	NA	NA	NA	NA	NA
E9PRU1	NA	NA	NA	0.00245279588857225	NA	NA	NA	NA	NA	NA	NA	NA	NA	NA	NA	NA	NA	NA	NA	NA	NA	NA	NA	NA	NA	NA	NA	NA	NA	NA	NA	NA	NA
E9PS23	NA	NA	NA	NA	NA	NA	NA	NA	NA	NA	NA	NA	NA	NA	0.0359574514041218	NA	NA	NA	NA	NA	NA	NA	NA	NA	0.0327924527598551	NA	NA	NA	NA	NA	NA	NA	NA
E9PS48	NA	NA	0.00636108384226778	NA	NA	NA	NA	NA	NA	NA	NA	NA	NA	NA	NA	0.00326105903830354	NA	NA	NA	NA	NA	NA	NA	NA	NA	NA	NA	NA	NA	NA	NA	NA	NA
E9PS50	NA	0.0198351646864011	NA	NA	NA	NA	NA	NA	NA	NA	NA	NA	NA	NA	0.0359574514041218	NA	NA	NA	0.0140008134011125	NA	NA	NA	NA	NA	NA	NA	NA	0.0197435217641733	NA	NA	NA	NA	NA
E9PS68	NA	NA	NA	NA	NA	NA	NA	0.00229308695376358	NA	NA	NA	NA	NA	NA	NA	NA	NA	NA	NA	NA	NA	NA	NA	NA	NA	NA	NA	NA	NA	NA	NA	NA	NA
E9PS89	NA	NA	NA	NA	NA	NA	NA	0	NA	NA	NA	NA	NA	NA	NA	NA	NA	NA	NA	NA	NA	NA	NA	NA	NA	NA	NA	NA	NA	NA	NA	NA	NA
E9PSE5	NA	NA	NA	NA	NA	NA	NA	NA	NA	NA	NA	NA	NA	NA	NA	NA	NA	NA	NA	NA	NA	NA	0.0196111570901775	NA	NA	NA	NA	NA	NA	NA	NA	NA	NA
F1BXA6	NA	NA	NA	NA	NA	NA	NA	NA	NA	NA	NA	NA	NA	NA	NA	NA	NA	NA	NA	NA	NA	NA	NA	NA	NA	NA	NA	NA	NA	NA	0.0462369076608996	NA	NA
F1T0B3	0.000652014626260073	NA	NA	NA	NA	NA	NA	NA	NA	NA	NA	NA	NA	NA	NA	NA	NA	NA	NA	NA	NA	NA	NA	NA	NA	NA	NA	NA	NA	NA	NA	NA	NA
F2Z2B9	NA	NA	NA	NA	0.000717466570196225	NA	NA	NA	NA	NA	NA	NA	NA	NA	NA	NA	NA	NA	NA	NA	NA	NA	NA	NA	NA	NA	NA	NA	NA	NA	NA	NA	NA
F2Z2C0	NA	NA	0.00146200528099283	NA	NA	NA	NA	NA	NA	NA	NA	NA	NA	NA	NA	NA	NA	NA	NA	NA	NA	NA	NA	NA	NA	NA	NA	NA	NA	NA	NA	NA	NA
F2Z2K0	NA	NA	NA	NA	NA	NA	NA	0.00387710501518102	NA	NA	0.00348317290623521	NA	0.0139291772407232	NA	NA	NA	NA	NA	NA	NA	NA	NA	NA	NA	NA	NA	NA	NA	NA	NA	NA	NA	NA
F2Z2Q9	NA	NA	NA	NA	0.0134883786955066	NA	NA	NA	NA	NA	NA	NA	NA	NA	NA	NA	NA	NA	NA	NA	NA	NA	NA	NA	NA	NA	NA	NA	NA	NA	NA	NA	NA
F2Z2T0	NA	NA	NA	NA	0.00281846759878362	NA	NA	NA	NA	NA	NA	0.00161828174518619	NA	NA	NA	NA	NA	NA	NA	NA	NA	NA	NA	NA	NA	NA	NA	NA	NA	NA	NA	NA	NA
F2Z2V2	NA	NA	NA	NA	0.0157364424408821	NA	NA	NA	NA	NA	NA	NA	NA	NA	NA	NA	NA	NA	NA	NA	NA	NA	NA	NA	NA	NA	NA	NA	NA	NA	NA	NA	NA
F2Z2V3	NA	NA	NA	NA	NA	NA	NA	NA	NA	NA	NA	NA	NA	NA	NA	NA	NA	NA	NA	NA	NA	NA	NA	NA	NA	NA	NA	0.0182810391458379	NA	NA	NA	NA	NA
F2Z2W8	NA	0.00806307477743902	NA	NA	NA	NA	NA	NA	NA	NA	NA	0.0176300654232705	NA	NA	NA	NA	NA	NA	NA	NA	NA	NA	NA	NA	NA	NA	NA	NA	NA	NA	NA	NA	NA
F2Z2Y4	NA	NA	0.00650932936217478	0.00448928564159185	NA	NA	NA	NA	NA	NA	NA	NA	0.00525142414287478	0.003177966	NA	NA	NA	NA	NA	NA	NA	NA	NA	NA	NA	NA	NA	NA	NA	NA	NA	NA	NA
F2Z388	NA	NA	0.019558124268883	NA	0.00737645724663434	NA	NA	NA	NA	NA	NA	NA	NA	NA	NA	0.0164072036146088	NA	NA	0.00546906752151591	0.0230463951079825	NA	NA	NA	NA	NA	NA	NA	NA	NA	NA	NA	NA	NA
F2Z393	0.00949075098042667	0.00216541087936381	0.00670830436135027	0.0133243563595341	0.0180041386567253	NA	NA	0.00895205000250241	0.00288264022931912	NA	NA	NA	0.0173034257119363	0.001819505	NA	NA	NA	NA	0.00477647876707831	0.0052332423688744	NA	NA	0.00408208930381305	0.00586151603315783	NA	NA	0.00282200407891814	0.003233109291077	NA	NA	NA	0.0041514572188322	0.00405223065438203
F2Z3J2	NA	NA	NA	NA	0.0196705523429627	0.0110808903164136	NA	NA	NA	NA	0.0113686898355936	NA	0.0143568278589388	0.013888889	NA	NA	NA	NA	NA	NA	NA	NA	0.00708180635875459	NA	NA	NA	NA	NA	NA	NA	NA	NA	NA
F2Z3K5	NA	0.00908480791263317	NA	0.018116151758212	NA	NA	NA	NA	NA	NA	NA	0.0082767101322596	0.031563102066077	NA	NA	0.00801573328806618	0.00773425034389899	0.0180840066614424	0.00801573328806618	NA	NA	NA	0.0116768726276386	0.00723280078478378	0.00750972229144312	0.00762742703134982	0.00455365092047587	NA	NA	NA	NA	0.0127132163186231	NA
F2Z3L6	NA	NA	NA	NA	0.00850618492454963	NA	NA	NA	NA	NA	NA	NA	NA	NA	NA	NA	NA	NA	NA	NA	NA	NA	NA	NA	NA	NA	NA	NA	NA	NA	NA	NA	NA
F4NBX2	NA	NA	NA	NA	NA	NA	NA	NA	NA	NA	NA	NA	NA	NA	NA	NA	NA	NA	0.00300405030051812	NA	NA	NA	NA	NA	NA	NA	NA	NA	NA	NA	NA	NA	NA
F4ZW66	NA	NA	NA	NA	NA	NA	NA	NA	NA	NA	NA	0.00479964395062498	NA	NA	NA	NA	NA	NA	NA	NA	NA	NA	NA	NA	NA	NA	NA	NA	NA	NA	NA	NA	NA
F5GWA7	NA	NA	NA	NA	NA	NA	NA	NA	NA	NA	NA	NA	NA	0.006007752	0	0.00681725663056234	NA	NA	0.0128263264379305	NA	NA	0.00933102984779945	0.00751000899738513	NA	0.00419438364124956	NA	0.00173409320376665	NA	NA	NA	NA	NA	NA
F5GWF6	NA	0.0018712415024492	0.00392906955152094	NA	0.00653210805830378	0.0040142096563554	0.00265049336784464	0.00663761186944398	NA	NA	NA	0.00306862958447714	0.00600277941963705	NA	NA	0.00297187118021286	NA	NA	0.00363228606465036	0.00426140868968807	NA	0.00212919081307843	0.00144308481534814	0.00491625714450284	NA	NA	0.00309519312281221	0.00186259594582341	0.00334201027109433	NA	NA	NA	0.00262630464134815
F5GWH5	NA	0.425039243705063	NA	NA	0.269767579575252	0.341924613084434	0.30102035086592	0.520639834156223	0.377214084286105	NA	NA	0.154892714007326	0.147670228372536	0.571428571	0.462310094566977	NA	0.434222900440597	NA	0.450026156736438	0.474097278852437	NA	0.322420400826621	NA	NA	NA	NA	0.255654949458634	0.141025155599406	NA	NA	NA	0.237918756110426	0.39769751530089
F5GWP8	NA	NA	NA	NA	NA	NA	NA	NA	NA	NA	NA	0.00116502446299208	NA	0.00095511	NA	NA	NA	NA	NA	NA	NA	0.00161672148080923	NA	NA	NA	0.00143150871488857	NA	0.00094286175360898	NA	0.00133295561231461	NA	NA	NA
F5GX11	NA	NA	NA	NA	0.00420147708946545	0.00580939844260779	NA	0.0129001576655996	0.012817954487035	NA	NA	NA	0.0175627210470381	0.013349515	NA	NA	NA	0.00575001174631769	NA	0.0107400679453395	NA	NA	NA	0.00229974925814894	NA	NA	0.00760139141685661	NA	NA	NA	NA	0.00336859042996821	0.0067569962430504
F5GX14	NA	NA	0.00581894594497442	NA	NA	NA	NA	NA	NA	NA	NA	NA	0.00293662376277252	NA	NA	NA	NA	NA	NA	NA	NA	NA	NA	NA	NA	NA	NA	NA	NA	NA	NA	NA	NA
F5GX19	NA	NA	NA	NA	0.0091668596192991	NA	NA	NA	NA	NA	NA	0.0157900341574736	0.015053761340472	0.019417476	NA	NA	NA	NA	NA	0.0107400679453395	NA	NA	NA	NA	NA	NA	NA	NA	NA	NA	NA	NA	NA
F5GX29	NA	NA	NA	NA	0.00737645724663434	NA	NA	NA	NA	NA	NA	0.0127060429332075	NA	0.010416667	NA	NA	NA	NA	NA	NA	NA	NA	NA	NA	NA	NA	NA	NA	NA	NA	NA	NA	NA
F5GX30	NA	NA	NA	NA	NA	NA	NA	NA	NA	NA	NA	NA	NA	0.010471204	NA	NA	NA	NA	NA	NA	NA	NA	NA	NA	NA	NA	NA	NA	NA	NA	NA	NA	NA
F5GXD8	NA	NA	NA	NA	NA	NA	NA	NA	NA	NA	NA	0.002618958997965	NA	NA	NA	NA	NA	NA	NA	NA	NA	NA	NA	NA	NA	NA	NA	NA	NA	NA	NA	NA	NA
F5GXG4	NA	NA	NA	NA	0.0134883786955066	NA	NA	NA	NA	NA	NA	0.00258154481782666	NA	NA	NA	NA	NA	NA	0.00375021841907959	NA	NA	NA	NA	NA	NA	NA	NA	NA	NA	NA	NA	NA	NA
F5GXH2	NA	NA	0.0082350001233758	0.00892186430734241	0.0244328970019079	NA	NA	NA	0.00257358571265989	0.00933050865834779	NA	0.00951095630396505	0.00755622562415371	NA	NA	0.0207248886658152	NA	NA	0.0130490044803575	0.0105123909450845	NA	NA	0.00372726698766145	0.0111214132397425	0.0043147965452143	0.00876485029046739	NA	0.00432971977172013	NA	NA	NA	0.00852194363391441	NA
F5GXR3	NA	NA	NA	NA	0.00907871697439093	NA	NA	NA	0.0592419552148709	NA	0.0157412625344582	NA	0.0596360540242546	0.048076923	NA	NA	NA	NA	NA	NA	NA	NA	NA	NA	NA	NA	NA	NA	NA	NA	NA	0.0240206437498536	NA
F5GXS2	NA	0.00475683646707098	0.00259777967987188	0.00595182907373365	NA	0.00358548292167337	0.00237290790310174	0.00570196390526205	NA	0.000718701673205076	0.00203386741742007	0.0012210009859585	NA	NA	0.00707063591906342	0.00751169769265921	NA	0.00155621584030316	0.00367045893332248	NA	NA	0.00547049645669175	0.00245707366462725	0.0074690070185552	0.000923210522723691	NA	0.00265907402934381	0.00590095957969354	NA	NA	NA	NA	0.00314631164077473
F5GXX5	NA	NA	NA	NA	NA	NA	NA	NA	NA	NA	NA	NA	0.0304026943503228	NA	NA	NA	NA	NA	NA	0.0130144352228831	NA	NA	0.0207955175549435	NA	NA	NA	NA	NA	NA	NA	NA	NA	NA
F5GXY2	NA	NA	NA	NA	0.0208810485690059	NA	NA	NA	NA	NA	NA	0.0139006283608528	0.00552185647124891	NA	NA	NA	NA	NA	NA	NA	NA	NA	NA	0.00803810680483769	NA	NA	NA	NA	NA	NA	NA	NA	NA
F5GY03	NA	NA	NA	NA	NA	0.0214180968796097	0.0141418958833222	NA	0.0059071553279034	NA	NA	NA	NA	0.013422819	NA	NA	NA	0.0317987227253208	NA	NA	NA	NA	NA	0.0312652773666209	NA	0.00670599230991304	NA	NA	NA	NA	NA	NA	NA
F5GY37	NA	0.00185722498332356	0.00538597566674323	NA	NA	NA	NA	NA	NA	NA	NA	0.00316408469767212	0.00796298016672431	0.001872659	0.00404016273974111	0.00262187533785861	NA	NA	0.0091765631574746	0.0188843156453145	NA	NA	0.00954850368894924	NA	NA	NA	0.00335128179063651	0.00462161095900993	NA	NA	NA	0.006237570625064	0.00347550854261846
F5GY55	NA	NA	NA	NA	NA	NA	NA	NA	NA	NA	NA	NA	NA	NA	NA	NA	NA	NA	NA	0.00297372840103	NA	NA	NA	NA	NA	NA	NA	NA	NA	NA	NA	NA	NA
F5GY80	NA	0.00215599611844541	0.00667913803438117	NA	0.00410515873341507	0.0034688003497509	NA	NA	NA	NA	NA	NA	NA	NA	NA	NA	NA	0.00257500517275731	NA	NA	NA	NA	NA	0.00205977577679745	0.00213863820208243	NA	NA	0.00214603493144597	NA	NA	NA	NA	NA
F5GYF7	NA	NA	NA	NA	0.00445370991099987	NA	NA	NA	NA	NA	NA	NA	0.00487590362561648	NA	NA	NA	NA	NA	NA	0.00173935055331515	NA	NA	0.0048102837376073	NA	NA	NA	NA	NA	NA	NA	NA	NA	NA
F5GYJ8	NA	NA	NA	NA	0.00495202701140118	NA	NA	NA	NA	NA	NA	NA	NA	NA	NA	NA	NA	NA	NA	NA	NA	NA	NA	NA	NA	NA	NA	NA	NA	NA	NA	NA	NA
F5GYK6	NA	NA	NA	NA	NA	NA	NA	NA	NA	NA	NA	0.0206523617953603	NA	NA	NA	NA	NA	NA	NA	NA	NA	NA	NA	NA	NA	NA	NA	NA	NA	NA	NA	NA	0.0044188614976452
F5GYL4	NA	NA	NA	NA	NA	NA	NA	NA	NA	NA	NA	NA	NA	NA	NA	NA	NA	NA	NA	0.0289320901513612	NA	NA	NA	NA	NA	NA	NA	NA	NA	NA	NA	NA	NA
F5GZ03	NA	NA	NA	NA	NA	NA	NA	NA	0.0141203135226206	NA	NA	NA	NA	NA	NA	NA	NA	NA	NA	NA	NA	NA	NA	NA	NA	NA	NA	NA	NA	NA	NA	NA	NA
F5GZI0	NA	NA	0.016222516091945	NA	NA	0.0164839689140868	NA	0.018824787383541	NA	NA	NA	NA	0.00854290596156169	0.012396694	NA	NA	NA	NA	NA	NA	NA	NA	NA	NA	NA	NA	NA	NA	NA	NA	NA	NA	NA
F5GZQ3	0.00645133263894524	NA	NA	NA	NA	NA	NA	NA	NA	NA	NA	NA	0.00204556403290652	0.006156552	NA	0.00877359698639466	NA	NA	NA	0.00437820745322179	NA	NA	NA	NA	NA	NA	NA	NA	NA	NA	NA	NA	NA
F5GZS6	NA	NA	0.0112295448779601	NA	NA	NA	NA	NA	NA	NA	NA	NA	NA	NA	NA	NA	NA	NA	NA	NA	NA	NA	NA	NA	NA	NA	NA	NA	NA	NA	NA	NA	NA
F5H013	NA	NA	0.0276793112990181	NA	NA	NA	NA	NA	NA	NA	NA	NA	NA	NA	NA	0.0425700422933373	NA	NA	NA	NA	NA	NA	NA	0.0469480438459193	NA	NA	NA	NA	NA	NA	NA	NA	NA
F5H037	NA	NA	NA	NA	NA	NA	NA	NA	NA	NA	NA	NA	NA	NA	NA	NA	NA	NA	NA	0.00154500970318929	NA	NA	NA	NA	NA	NA	NA	NA	NA	NA	NA	NA	NA
F5H039	NA	NA	NA	NA	NA	NA	NA	NA	NA	NA	NA	NA	NA	0.001342282	NA	NA	NA	NA	NA	NA	NA	NA	NA	NA	NA	NA	NA	NA	NA	NA	NA	NA	NA
F5H047	NA	NA	NA	NA	0.0152288147171324	NA	NA	0.00489849298859578	NA	NA	NA	NA	0.0055574816184677	NA	NA	NA	NA	NA	NA	NA	NA	NA	NA	NA	NA	NA	0.00360803349957157	NA	NA	NA	NA	NA	NA
F5H0C5	NA	NA	NA	NA	NA	NA	NA	0.00271166537106422	NA	NA	NA	NA	0.00307646259578394	NA	NA	NA	NA	NA	NA	NA	NA	NA	NA	NA	NA	NA	NA	NA	NA	NA	NA	NA	NA
F5H0C7	NA	NA	0.0251013363324763	NA	NA	NA	NA	NA	NA	NA	NA	NA	NA	NA	NA	NA	NA	NA	NA	0.0162680434754904	NA	NA	NA	NA	NA	NA	NA	NA	NA	NA	NA	NA	NA
F5H0C8	NA	NA	NA	NA	NA	NA	NA	NA	0.00636451784855281	NA	NA	0.0169891755994043	NA	0.011904762	NA	NA	NA	NA	0.0116673446759372	NA	NA	NA	NA	NA	NA	NA	NA	NA	NA	NA	NA	NA	NA
F5H0Y3	NA	NA	NA	NA	NA	NA	NA	0.00542333165324814	NA	NA	NA	NA	NA	NA	NA	NA	NA	NA	NA	NA	NA	NA	NA	NA	NA	NA	NA	NA	NA	NA	NA	NA	NA
F5H124	NA	NA	NA	NA	NA	NA	NA	0.0337451744276152	NA	NA	NA	0.013385790072627	NA	0.037037037	NA	NA	NA	NA	NA	NA	NA	NA	0.0251797575285633	NA	NA	NA	NA	NA	NA	NA	NA	NA	NA
F5H136	NA	NA	NA	NA	NA	NA	NA	NA	NA	NA	NA	NA	NA	NA	NA	NA	NA	NA	NA	NA	NA	NA	NA	NA	NA	NA	NA	NA	NA	NA	NA	0.00612290901153383	NA
F5H1C6	NA	NA	NA	NA	NA	NA	NA	NA	NA	NA	NA	NA	0.0040857373641317	0.003952569	NA	NA	0.00600703641438691	0.00468182747914944	0.00830087736112519	0.00437243847950605	NA	NA	NA	0.00374504678076837	NA	0.00197468996632398	0.00176836464449963	0.00292641144964015	NA	0.00337102447471735	NA	0.00246852474300204	0.00550174450472232
F5H1D6	NA	NA	NA	NA	NA	NA	NA	NA	NA	NA	NA	NA	NA	NA	NA	NA	NA	NA	NA	NA	NA	NA	NA	NA	NA	NA	NA	NA	NA	NA	0.00104021739220615	NA	NA
F5H1Y0	NA	NA	NA	NA	NA	NA	NA	NA	NA	NA	NA	NA	NA	NA	NA	NA	NA	NA	NA	NA	0	NA	NA	NA	NA	NA	NA	NA	NA	NA	NA	NA	NA
F5H248	NA	NA	NA	NA	NA	NA	NA	NA	NA	NA	NA	NA	NA	0.002544529	NA	NA	NA	NA	NA	NA	NA	NA	NA	NA	NA	NA	NA	NA	NA	NA	NA	NA	NA
F5H296	NA	NA	NA	NA	NA	NA	NA	NA	NA	NA	NA	NA	NA	0.011363636	NA	NA	NA	NA	NA	NA	NA	NA	NA	NA	NA	NA	NA	NA	NA	NA	NA	NA	NA
F5H2F4	NA	NA	NA	NA	NA	NA	NA	NA	NA	NA	NA	NA	NA	0.001452916	NA	NA	NA	NA	NA	NA	NA	NA	NA	NA	NA	NA	NA	NA	NA	NA	NA	NA	NA
F5H2N6	NA	NA	NA	NA	NA	NA	NA	NA	NA	NA	NA	0.00164779500288363	NA	NA	NA	NA	NA	NA	NA	NA	NA	NA	NA	NA	NA	NA	NA	NA	NA	NA	NA	NA	NA
F5H2R5	NA	NA	NA	NA	NA	NA	NA	NA	NA	NA	NA	NA	0.0117464950510901	0.022727273	NA	NA	NA	NA	NA	NA	NA	NA	NA	NA	NA	NA	0.010168094245194	0.00841343230073039	NA	NA	NA	NA	NA
F5H2V6	NA	NA	NA	NA	0.00953723755684172	NA	NA	NA	NA	NA	NA	NA	NA	NA	NA	NA	NA	NA	NA	NA	NA	NA	NA	NA	NA	NA	NA	NA	NA	NA	NA	NA	NA
F5H365	NA	0.00411362769716977	0.00314088538428577	NA	0.00265834300557316	0.00232648538241569	NA	0.0045807928345172	NA	NA	NA	NA	0.00311822477001753	0.007063851	0.00162703441996128	NA	NA	NA	NA	0.00208564716671773	NA	NA	NA	NA	NA	NA	0.00202441662583872	0.00074447687257039	NA	NA	NA	NA	0.00307920615059754
F5H3C1	NA	0.00367317893948412	NA	NA	0.01398794873143	0.0118196163906961	NA	0.0101235522371726	0.00651974923983905	NA	NA	0.0080314736098766	0.0153139497851141	0.014814815	NA	NA	NA	NA	0.00777822943393781	NA	NA	NA	0.00755392685065691	0.00350924797065375	NA	NA	NA	NA	NA	NA	NA	0.00616826370188456	NA
F5H3K7	NA	NA	NA	NA	0.0265968035137081	NA	NA	0.00641633642544275	NA	NA	NA	NA	NA	0.01056338	NA	NA	NA	NA	NA	NA	NA	NA	NA	NA	NA	NA	NA	NA	NA	NA	NA	NA	NA
F5H3X6	NA	NA	NA	NA	NA	NA	NA	0.00475284139168217	NA	NA	NA	NA	0.0101566608349556	NA	NA	NA	NA	NA	NA	NA	NA	NA	NA	0.00259486611020286	NA	NA	NA	NA	NA	NA	NA	NA	NA
F5H442	NA	NA	NA	NA	0.00406976967817524	NA	NA	NA	NA	NA	NA	NA	NA	NA	NA	NA	NA	NA	NA	NA	NA	NA	NA	NA	NA	NA	NA	NA	NA	NA	NA	NA	NA
F5H4B6	NA	NA	NA	NA	0.00548945609452051	NA	NA	NA	NA	NA	NA	0.00630377270866349	NA	NA	0.00313582455767024	NA	NA	NA	NA	NA	NA	0.00984132010179184	NA	NA	NA	NA	0.00390171060326728	NA	NA	NA	NA	0.0084723978857196	NA
F5H4C6	NA	NA	0.00414629360369205	NA	NA	NA	NA	NA	NA	NA	NA	NA	NA	NA	NA	NA	NA	NA	NA	NA	NA	NA	NA	NA	NA	NA	NA	NA	NA	NA	NA	NA	NA
F5H4Z3	NA	NA	NA	NA	NA	NA	NA	NA	NA	NA	NA	NA	NA	0.007874016	NA	NA	NA	NA	NA	NA	NA	NA	NA	NA	NA	NA	NA	NA	NA	NA	NA	NA	NA
F5H4Z8	NA	NA	0.00223831870501725	NA	NA	NA	NA	NA	NA	NA	NA	NA	NA	NA	NA	NA	NA	NA	NA	NA	NA	NA	NA	NA	NA	NA	NA	NA	NA	NA	NA	NA	NA
F5H520	NA	NA	NA	0.0101035681554311	NA	NA	NA	NA	NA	NA	NA	NA	NA	NA	NA	NA	NA	NA	NA	NA	NA	NA	NA	NA	NA	NA	NA	NA	NA	NA	NA	NA	NA
F5H563	NA	NA	NA	NA	NA	NA	NA	NA	NA	NA	NA	NA	NA	NA	0.000724948612668894	NA	NA	NA	NA	NA	NA	0.00113757252361993	NA	NA	NA	0.00201450180875471	NA	0.00248784267763604	NA	0.0119328800102116	NA	0.00209857749401445	NA
F5H571	NA	NA	NA	NA	0.00689187239509	NA	NA	0.0066505087689455	NA	NA	NA	0.0197855654402289	0.0150903881348488	NA	NA	NA	NA	NA	0.00383233949209617	0.00807464942934688	NA	0.00411850872437952	0.00372182544061603	NA	NA	NA	NA	NA	NA	NA	NA	0.0121564326602426	0.00338671846287533
F5H5D3	0.00812985790231382	NA	NA	0.00311009802616408	NA	NA	0.00591155970814566	0.0233207768398878	NA	NA	0.00510315253240791	0.00406797537948767	0.0164602517453279	NA	0.00968430110477648	NA	0.00336886727613822	NA	NA	NA	NA	0.00140707180684658	0.0096637521065363	NA	0.00867417082323159	NA	NA	NA	0.00441712260053351	NA	NA	NA	NA
F5H608	NA	NA	NA	NA	0.0116566237854939	NA	NA	0.0112483914758717	NA	NA	NA	NA	NA	NA	NA	NA	NA	NA	NA	0.0102428421473003	NA	NA	NA	0.0087731189791375	NA	NA	NA	NA	NA	NA	NA	0.0154206605037849	NA
F5H658	NA	NA	NA	NA	0.000889064918089706	NA	NA	NA	NA	NA	NA	NA	NA	NA	NA	NA	NA	NA	NA	NA	NA	NA	NA	NA	NA	NA	NA	NA	NA	NA	NA	NA	NA
F5H6E2	NA	0.00154962224112509	0.00168911120713863	0.00264867875229955	0.000491763501713447	NA	NA	NA	NA	NA	NA	0.00141178218671783	NA	0.000694444	NA	0.00164072036146088	NA	NA	NA	0.00115232014257857	NA	NA	NA	NA	NA	NA	NA	NA	NA	NA	NA	NA	NA
F5H6I0	NA	NA	NA	NA	NA	NA	NA	NA	NA	NA	NA	NA	NA	0.01980198	NA	NA	NA	NA	NA	0.0109527422952527	NA	NA	NA	0.00469057854852373	NA	NA	NA	NA	NA	NA	NA	NA	NA
F5H6T1	NA	NA	0.00418014124954791	NA	NA	NA	NA	0.00278914152452319	NA	NA	NA	NA	0.00386755401124855	NA	NA	NA	NA	NA	0.00214298135372489	NA	NA	0.00345450373839575	NA	NA	NA	NA	NA	NA	NA	NA	NA	NA	NA
F5H6X6	NA	0.00554777060124886	0.00625370845861402	0.00506326756070753	0.0159378581993162	0.00615881507951498	0.0103939331897572	0.0184487582567187	0.00516191332893303	0.00261132089656148	0.00626301290836526	0.00889306123282649	0.0194246032515137	0.006963827	0.00785649681459453	0.00400991951334935	0.00870577791029489	0.0027524270497168	0.00953274175918136	0.00545276315758465	NA	0.00980283697004886	0.0109202548806416	NA	0.00241515629972623	NA	0.00360405704249166	0.00441876601640481	0.00289896176806957	NA	0.00273684024019839	0.00888517752936755	0.00773363329849443
F5H783	NA	NA	NA	NA	NA	NA	NA	NA	NA	NA	NA	NA	0.00506711589733573	0.009803922	NA	NA	NA	NA	NA	0.00542268152723911	NA	NA	NA	NA	NA	NA	NA	NA	NA	NA	NA	NA	NA
F5H7V9	NA	NA	NA	NA	NA	NA	0.00379615304148695	NA	NA	NA	NA	NA	NA	0.000471506	NA	0.000514232738082263	NA	NA	NA	NA	NA	NA	NA	0.00101367574309719	NA	0.000814205334771382	NA	NA	0.00192784222905255	NA	NA	NA	NA
F5H7Y1	NA	NA	NA	NA	NA	NA	NA	NA	NA	NA	NA	NA	NA	NA	NA	NA	NA	NA	NA	0.0374992196649907	NA	NA	NA	NA	NA	NA	NA	NA	NA	NA	NA	NA	NA
F5H8B0	NA	NA	NA	NA	NA	NA	NA	NA	NA	0.00731630359775719	NA	NA	NA	NA	NA	0.00611146650883879	NA	NA	NA	NA	NA	NA	NA	0.0140369909351181	0.00156154579113416	NA	NA	NA	NA	NA	NA	NA	NA
F6QUT6	NA	NA	NA	NA	NA	NA	NA	NA	NA	NA	NA	NA	0.0134397066965147	NA	NA	NA	NA	NA	NA	NA	NA	NA	NA	NA	NA	NA	NA	NA	NA	NA	NA	NA	NA
F6RFD5	NA	NA	0.0151723634353998	0.00753401818337108	0.01398794873143	NA	NA	0.01349806995327	NA	NA	NA	NA	0.0153139497851141	NA	NA	NA	NA	NA	NA	0.0163885480994167	NA	NA	NA	0.0140369909351181	NA	NA	0.0132561827169678	0.0073124150660295	NA	NA	NA	0.0185047919383693	NA
F6S8M0	NA	NA	0.00253885405204712	NA	NA	NA	NA	NA	NA	NA	NA	NA	0.00118271374673832	NA	NA	NA	NA	NA	0.000800962403298587	NA	NA	NA	NA	NA	NA	NA	NA	NA	NA	NA	NA	0.000635176341968573	NA
F6TR53	NA	NA	NA	NA	NA	NA	NA	NA	NA	NA	NA	NA	NA	0.005747126	NA	NA	NA	NA	NA	NA	NA	NA	NA	NA	NA	NA	NA	NA	NA	NA	NA	NA	NA
F6UXX1	NA	NA	NA	NA	NA	NA	NA	0.012312428962933	NA	NA	NA	NA	NA	NA	NA	NA	NA	NA	NA	NA	NA	NA	NA	NA	NA	NA	NA	NA	NA	NA	NA	NA	NA
F6VDH7	NA	NA	NA	NA	0.0108944603692691	NA	NA	NA	NA	NA	NA	NA	0.00695753936051195	0.020512821	0.00829787381584487	NA	NA	NA	0.00807739287182617	0.00850943867024516	NA	NA	NA	0.0109326567020381	NA	NA	NA	NA	NA	NA	NA	NA	NA
F6VRR5	NA	NA	NA	NA	NA	NA	NA	NA	NA	NA	NA	0.00495090861244085	0.00236002645487932	NA	NA	NA	NA	NA	NA	NA	NA	NA	NA	NA	NA	NA	NA	NA	NA	NA	NA	NA	NA
F8VNT5	NA	NA	NA	NA	NA	NA	NA	NA	NA	NA	NA	NA	NA	0.00625	NA	NA	NA	NA	0.00328144072292175	NA	NA	NA	NA	NA	NA	NA	NA	NA	NA	NA	NA	NA	NA
F8VNV6	NA	0.00504283871492596	NA	NA	NA	NA	0.00595238032533489	NA	NA	NA	NA	NA	NA	NA	NA	NA	NA	NA	NA	NA	NA	NA	NA	0.00374716254129309	NA	NA	NA	NA	NA	NA	NA	NA	NA
F8VP03	NA	NA	0.00975366257423361	NA	NA	NA	NA	NA	NA	NA	NA	NA	NA	NA	NA	NA	NA	NA	NA	NA	NA	NA	NA	NA	NA	NA	NA	NA	NA	NA	NA	NA	NA
F8VPA1	NA	NA	NA	NA	NA	NA	NA	NA	NA	NA	NA	NA	NA	NA	NA	NA	NA	NA	NA	NA	NA	NA	NA	0.0045118901126267	NA	NA	NA	NA	NA	NA	NA	NA	NA
F8VPD4	NA	0.00111433558504908	0.00151989960535686	NA	0.00148334252784745	0.00155221385116631	NA	0.00261152693704705	NA	NA	0.00183942844386887	0.00187814695503627	0.00265474536733845	NA	0.000606024734578232	NA	NA	NA	0.000835722573618869	0.0011164374579348	NA	0.00190191780123442	0.000859365699126297	0.000532301850098533	NA	NA	0.000879711492411891	NA	NA	NA	NA	NA	0.00149881362738024
F8VPE8	NA	0.010803466418974	0.010319438520362	0.00997149564163975	0.0113137821038413	0.0117327070184031	NA	0.0208426077615012	0.0143818003373947	NA	0.00468122498567217	0.0106298925948431	0.0152013466583156	0.013071895	0.0105757215723012	0.0060052507353972	0.00132442760953844	NA	0.0102947164464475	0.01205040265638	NA	0.0073756304014212	0.0070355205759027	0.0123855796795178	0.00964483956783751	NA	0.0146207893271241	0.0161303279612621	NA	NA	NA	0.0154206605037849	NA
F8VPW9	NA	NA	NA	NA	NA	NA	NA	NA	NA	NA	NA	NA	NA	NA	NA	NA	NA	NA	NA	NA	NA	NA	NA	0.0129794091342711	NA	NA	NA	NA	NA	NA	NA	NA	NA
F8VQ14	NA	NA	NA	NA	NA	NA	NA	NA	NA	NA	NA	NA	NA	0.004273504	0.00605053236146481	NA	NA	NA	NA	NA	NA	NA	NA	NA	NA	NA	NA	NA	NA	NA	NA	0.00365313935864168	NA
F8VQE1	NA	NA	NA	NA	NA	NA	0.0017618250021715	NA	NA	NA	NA	NA	0.00158453241193051	0.003065775	NA	NA	NA	NA	NA	NA	NA	NA	NA	NA	NA	NA	NA	NA	NA	NA	NA	NA	0.000775886641042
F8VQQ3	NA	NA	NA	NA	0.00941049656668652	NA	NA	0.00454046394277326	NA	NA	NA	0.00804481529378428	0.00343419121326479	0.009966777	NA	NA	NA	NA	0.00348857471190186	0.0036751725499252	NA	NA	NA	NA	NA	NA	0.0014863663701934	NA	NA	NA	NA	NA	NA
F8VQQ4	0.011726882412246	0.0206403950155267	0.0165777166672002	0.00914651563273471	NA	0.0309308304259387	NA	NA	0.048968479344401	NA	NA	NA	NA	NA	NA	NA	NA	NA	NA	0.0111418540104305	NA	NA	0.0122275804396237	0.0170413111879259	NA	NA	0.0313284598373082	0.0355099312092216	NA	NA	NA	0.0503223846052081	0.0601208855483321
F8VQQ8	NA	NA	NA	NA	0.0318265120061212	NA	NA	0.0153559505550171	0.0296685233051657	NA	NA	0.0243651458774335	0.0174217689281761	0.02247191	NA	NA	NA	NA	0.0176976582680303	0.0248590331989136	NA	NA	0.0114582042227831	NA	NA	NA	NA	0.0110918661041886	NA	NA	0.0161818034616893	NA	0.0208530531116325
F8VQX6	NA	NA	NA	0.00565051440034769	NA	NA	NA	NA	NA	NA	NA	NA	NA	NA	NA	0.00583367286299913	NA	NA	NA	NA	NA	NA	NA	NA	NA	NA	NA	NA	NA	NA	NA	NA	NA
F8VQY6	NA	NA	NA	NA	0.0199476031073743	NA	NA	NA	NA	NA	NA	NA	0.0072795187877823	NA	NA	NA	NA	NA	NA	NA	NA	NA	NA	0.0100087695529244	NA	NA	0.012602708725719	NA	NA	NA	NA	NA	0.0147036049124233
F8VQZ7	NA	NA	0.0011717788720321	NA	0.00216061035663242	NA	0.00241091864582862	NA	NA	NA	NA	NA	NA	NA	NA	NA	NA	NA	NA	NA	NA	NA	NA	NA	NA	NA	NA	NA	NA	NA	NA	NA	NA
F8VR28	NA	NA	NA	NA	NA	NA	NA	NA	NA	NA	NA	NA	NA	0.010309278	NA	NA	NA	NA	NA	NA	NA	NA	NA	NA	NA	NA	NA	NA	NA	NA	NA	NA	NA
F8VR50	NA	NA	0.00609603885286237	NA	NA	NA	NA	NA	NA	NA	NA	NA	NA	NA	NA	NA	NA	NA	NA	NA	NA	NA	NA	NA	NA	NA	NA	NA	NA	NA	NA	NA	NA
F8VR69	NA	0.0104947965449154	NA	NA	0.0337209476829531	0.0189958119709948	NA	0.0180777721774938	0.0139708921083927	NA	NA	NA	0.0369175573515568	NA	NA	0.0200011624516154	0.0201029121981554	NA	0.0333352711027127	NA	0.166352650990387	0.0597074816763547	0.0387331470429483	0.00689316484450112	0.0108750484454256	NA	0.0426091585413697	NA	NA	NA	NA	0.0198265631479881	0.051553381973952
F8VR77	NA	NA	NA	NA	0.00559794407072474	NA	NA	0.00701129121853302	NA	NA	NA	0.0036427340071262	0.00715004064565337	0.011528327	NA	NA	NA	NA	NA	NA	NA	NA	NA	NA	NA	NA	NA	NA	NA	NA	NA	NA	NA
F8VRG3	NA	NA	NA	NA	NA	NA	NA	NA	NA	NA	NA	0.0183771021396908	NA	NA	NA	NA	NA	NA	NA	NA	NA	NA	NA	NA	NA	NA	NA	NA	NA	NA	NA	0.0282276489312538	0.015728150731566
F8VRH0	NA	NA	NA	NA	0.00809963897788194	0.00659964799703577	NA	0.0267976388108214	0.0258872413114434	NA	0.018056154685515	0.0239172577962724	0.022802021021165	0.036764706	NA	NA	NA	NA	NA	0.0271134065299686	NA	NA	0.0127472522615824	NA	NA	NA	0.0148035497641433	0.00725864753320913	NA	NA	NA	0.0183687278673171	0.0204697254684694
F8VRV7	NA	NA	NA	NA	NA	NA	0.0239448009004547	NA	NA	NA	NA	NA	NA	NA	NA	NA	NA	NA	NA	NA	NA	NA	NA	NA	NA	NA	NA	NA	NA	NA	NA	NA	NA
F8VS10	NA	NA	NA	NA	NA	NA	NA	NA	NA	NA	NA	NA	NA	0.003816794	NA	NA	NA	NA	NA	NA	NA	NA	NA	NA	NA	NA	NA	NA	NA	NA	NA	NA	NA
F8VS35	NA	NA	NA	NA	NA	NA	NA	NA	NA	NA	NA	0.00649250901581454	0.0041265133965812	NA	NA	NA	NA	NA	NA	NA	NA	NA	NA	NA	NA	NA	NA	NA	NA	NA	NA	NA	NA
F8VSD4	NA	NA	0.0195073241243327	NA	0.0254780491716162	0.015196649417231	NA	NA	NA	NA	NA	0.0309785432351649	0.0344563862412381	0.028571429	NA	NA	NA	NA	NA	NA	NA	NA	NA	0.0135356693903832	NA	NA	NA	NA	NA	NA	NA	NA	NA
F8VSI4	NA	NA	0.0154401961189661	NA	NA	NA	NA	NA	0.00923838546139851	NA	NA	NA	NA	NA	NA	NA	NA	NA	NA	NA	NA	NA	NA	NA	NA	NA	NA	NA	NA	NA	NA	NA	NA
F8VSL7	NA	NA	NA	NA	NA	NA	NA	NA	NA	NA	0.00243614741264008	NA	NA	NA	0.00963145983153714	NA	NA	NA	0.00625036333175863	NA	NA	NA	NA	NA	NA	0.0118951538228925	NA	NA	NA	NA	NA	NA	NA
F8VTQ5	NA	0.0136794234770746	0.0264862375979306	0.00233814413530413	0.0305684910953994	0.0220089406728559	0.0508620591607196	0.0206834643039151	0.0586777466792162	0.00733571040224281	0.0084677140795469	0.0351446225481471	0.0295255584462761	0.033333333	0.0312457854101408	0.00724180050577519	0.0151395726435551	0.0163379636505115	0.0205184340663223	0.0230781836465626	0.0240924536730145	0.00778256170278316	0.0492307672847472	0.00980169221562039	0.00848080717227872	0.0103364788251428	0.0138847081086888	0.0153182492701711	NA	0.0021388575433371	0.026486077755707	0.0127619251875941	0.0149327036033851
F8VTT8	NA	NA	NA	NA	NA	NA	NA	NA	NA	NA	NA	NA	NA	NA	NA	NA	NA	NA	NA	NA	NA	NA	NA	NA	NA	NA	0.00791851655335585	NA	NA	NA	NA	NA	NA
F8VTV8	NA	NA	NA	NA	NA	NA	NA	NA	NA	NA	NA	NA	NA	NA	NA	NA	NA	NA	NA	NA	NA	NA	NA	NA	NA	NA	NA	NA	NA	NA	NA	NA	0.0046167203859822
F8VU65	NA	NA	NA	NA	NA	NA	NA	NA	NA	NA	NA	0.00544848782513297	NA	NA	NA	NA	NA	NA	NA	NA	NA	NA	NA	NA	NA	NA	NA	NA	NA	NA	NA	NA	NA
F8VU68	NA	NA	NA	NA	NA	NA	NA	NA	NA	NA	NA	NA	NA	NA	0.00793179063986416	NA	NA	NA	NA	NA	NA	NA	NA	NA	NA	NA	NA	NA	NA	NA	NA	NA	NA
F8VU69	NA	NA	NA	NA	NA	NA	NA	NA	NA	NA	NA	NA	NA	NA	NA	NA	NA	NA	NA	NA	NA	NA	NA	NA	0.00734159440068848	NA	NA	NA	NA	NA	NA	NA	NA
F8VU90	NA	0.0135857291014037	NA	NA	0.0064670309460776	NA	NA	NA	NA	NA	NA	0.00742636291866127	0.0247802782930787	0.020547945	NA	NA	NA	NA	NA	NA	NA	NA	NA	NA	NA	NA	NA	NA	NA	NA	NA	NA	0.00635589629334137
F8VUA6	NA	0.0534023666159657	0.0413592782615711	0.0312951544099501	0.034499123558499	0.030685541800973	NA	0.0350430653662805	0.013541018058204	NA	0.0409272830807187	0.0450115583985474	0.0262398632331524	0.078461538	0.0165957465529662	0.0403869622590088	NA	NA	0.0471181233355509	0.0425471911387719	NA	0.0260416476462261	0.0339926723576264	0.0194358338211244	0.0302699569234366	NA	0.047033955788278	0.0329058692778969	NA	NA	0.0480060157521964	0.027757187907554	NA
F8VUC5	NA	NA	NA	NA	0.00993880575213607	NA	NA	NA	NA	NA	NA	NA	NA	0.021052632	NA	NA	NA	NA	0.0110532742351177	0.0291112358676502	NA	NA	NA	0.0149604772930532	NA	NA	NA	NA	NA	NA	NA	0.021913569225392	NA
F8VUF6	0.0183150175	NA	0.0278088960638528	0.0102375884013803	0.0232952391013475	0.0239048419860932	0.0234291357312668	NA	NA	0.0199190632845162	0.0160949986792162	NA	NA	NA	NA	0.0206472671043179	NA	0.023290777177614	NA	0.0170905851859748	NA	NA	0.0143227555334239	0.0212920645289725	0.0124353399252291	NA	NA	NA	0.0149263972532016	NA	NA	NA	NA
F8VUX9	NA	NA	NA	0.00153871755863781	NA	NA	NA	NA	0.00199735146627222	NA	NA	0.000820158468775775	NA	NA	NA	NA	NA	NA	NA	NA	NA	NA	NA	NA	NA	NA	NA	NA	NA	NA	NA	NA	NA
F8VV57	NA	NA	NA	NA	NA	NA	NA	NA	NA	NA	NA	NA	0.0121610777401291	NA	NA	NA	NA	NA	NA	NA	NA	NA	NA	NA	NA	NA	NA	NA	NA	NA	NA	NA	NA
F8VV71	NA	NA	NA	NA	NA	NA	NA	NA	NA	NA	0.0161555063930684	NA	NA	NA	NA	NA	NA	NA	NA	NA	NA	NA	NA	NA	NA	NA	NA	NA	NA	NA	NA	NA	NA
F8VVM2	NA	NA	0.00632181852480595	NA	0.00582831236484023	NA	NA	NA	NA	NA	NA	NA	0.00319040642058452	NA	NA	NA	NA	NA	0.0064818587366657	NA	NA	NA	NA	NA	NA	NA	NA	NA	NA	NA	NA	NA	NA
F8VW21	NA	NA	NA	NA	0.00240863871555957	NA	NA	NA	NA	NA	NA	NA	0.0105478738243567	NA	NA	NA	NA	NA	0.0107149088687465	0.0056440154219743	NA	NA	NA	NA	NA	NA	NA	NA	NA	NA	NA	NA	NA
F8VW96	NA	NA	NA	NA	0.00582831236484023	NA	NA	NA	NA	NA	0.00505275140183967	NA	NA	NA	NA	NA	NA	NA	NA	NA	NA	NA	NA	NA	NA	NA	NA	NA	NA	NA	NA	NA	NA
F8VWS0	NA	NA	NA	NA	NA	NA	NA	NA	NA	NA	NA	0.00325274699090111	NA	NA	NA	NA	NA	NA	NA	NA	NA	NA	NA	NA	NA	NA	NA	NA	NA	NA	NA	NA	NA
F8VWU0	NA	0.00692568577223318	NA	NA	NA	NA	NA	NA	NA	NA	NA	NA	NA	NA	NA	NA	NA	NA	NA	NA	NA	NA	NA	NA	NA	NA	NA	NA	NA	NA	NA	NA	NA
F8VXC8	NA	NA	NA	NA	NA	NA	NA	NA	NA	NA	NA	NA	NA	NA	0.00171594928753352	NA	NA	NA	NA	0.00068117475188784	NA	NA	NA	NA	NA	NA	NA	NA	NA	NA	NA	NA	NA
F8VXH9	NA	NA	NA	NA	NA	NA	NA	NA	NA	NA	NA	NA	NA	NA	0.00337101110284653	NA	NA	NA	NA	NA	NA	NA	NA	NA	NA	NA	NA	NA	NA	NA	NA	NA	NA
F8VXJ7	NA	NA	NA	NA	0.00562015794715886	0.00356171494401754	NA	0.00271166537106422	NA	NA	NA	0.00645386312881564	0.00922938882104341	0.024305556	NA	0.00625036333175863	NA	NA	0.0125007266635173	0.00658468447459886	NA	0.0134341834618152	NA	NA	NA	NA	0.00266307196143945	NA	NA	NA	NA	0.00495664078699703	NA
F8VY02	NA	NA	NA	NA	0.00295058289865374	NA	NA	NA	NA	NA	NA	NA	NA	NA	NA	NA	NA	NA	NA	NA	NA	NA	NA	0.00888278321509465	NA	NA	NA	NA	NA	NA	NA	NA	NA
F8VY04	NA	NA	0.00628854541841531	NA	0.00347858239092223	NA	0.00184837061061153	NA	NA	NA	NA	NA	0.00816072330195703	NA	NA	0.00552663711755885	NA	NA	NA	NA	NA	NA	NA	NA	NA	NA	NA	NA	NA	NA	NA	NA	NA
F8VYN5	NA	NA	0.00906313782646962	NA	0.020889082652169	NA	NA	NA	NA	NA	NA	NA	NA	NA	0.0175014148011778	NA	NA	NA	NA	NA	NA	NA	NA	NA	NA	NA	NA	NA	NA	NA	NA	NA	NA
F8VZ49	NA	NA	NA	NA	NA	NA	0.00456091405586899	NA	NA	NA	NA	NA	NA	NA	NA	NA	NA	NA	NA	NA	NA	NA	NA	NA	NA	NA	NA	NA	NA	NA	NA	NA	NA
F8VZ52	NA	NA	NA	NA	NA	NA	NA	NA	NA	NA	NA	NA	NA	NA	NA	NA	NA	NA	NA	0.00423841797430282	NA	NA	NA	NA	NA	NA	NA	NA	NA	NA	NA	NA	NA
F8VZE0	NA	NA	NA	NA	NA	NA	NA	NA	NA	NA	NA	NA	NA	NA	NA	NA	NA	NA	NA	NA	0	NA	NA	NA	NA	NA	NA	NA	NA	NA	NA	NA	NA
F8VZJ2	NA	0.00981938836042052	0.00760495973617462	NA	NA	NA	NA	0.0110507094767728	NA	NA	NA	NA	NA	NA	NA	NA	NA	NA	NA	NA	NA	NA	NA	0.00938115709704746	NA	NA	NA	0.00488701028879657	NA	NA	NA	NA	NA
F8VZQ9	NA	NA	0.0057860712269117	NA	0.00355625778398577	NA	NA	0.00772135323136356	NA	NA	NA	0.0122514010650442	0.00584006602526291	0.005649718	NA	NA	NA	NA	NA	NA	NA	NA	NA	0.00401481714388501	NA	NA	NA	0.00278863325736105	NA	NA	NA	NA	NA
F8VZS0	NA	NA	0.0155171895279766	NA	NA	NA	NA	NA	NA	NA	NA	NA	NA	0.005050505	NA	NA	NA	NA	NA	NA	NA	NA	NA	0.00478533771112017	NA	NA	NA	NA	NA	NA	NA	NA	NA
F8VZU9	NA	NA	NA	NA	NA	NA	NA	NA	NA	NA	NA	NA	NA	NA	NA	NA	NA	NA	NA	NA	NA	NA	NA	NA	NA	NA	NA	NA	NA	NA	NA	NA	0.00704293160922295
F8VZX2	NA	NA	NA	NA	NA	NA	NA	NA	NA	NA	NA	NA	NA	NA	NA	NA	NA	NA	NA	NA	NA	NA	0.00615384616553845	NA	NA	NA	NA	NA	NA	NA	NA	NA	NA
F8VZY9	NA	NA	NA	NA	NA	NA	NA	NA	NA	NA	NA	0.00659117892728553	NA	NA	NA	NA	NA	NA	NA	NA	NA	NA	NA	NA	NA	NA	NA	NA	NA	NA	NA	NA	NA
F8W079	0.00286978206613078	NA	0.00589856113835379	NA	NA	NA	NA	NA	NA	NA	NA	NA	NA	NA	NA	NA	NA	NA	NA	NA	NA	NA	NA	NA	NA	NA	NA	NA	0.00727632653491235	NA	NA	NA	NA
F8W0P7	0.00704336843973565	NA	NA	NA	NA	NA	NA	NA	NA	0.00393954833656417	NA	NA	NA	NA	NA	NA	NA	NA	NA	NA	NA	NA	NA	NA	NA	NA	NA	NA	0.0054668704027317	NA	NA	NA	NA
F8W0W4	NA	NA	NA	NA	NA	NA	NA	NA	NA	NA	NA	NA	NA	NA	NA	NA	NA	NA	NA	0.0112880308439486	NA	NA	0.0052029602940749	NA	NA	NA	NA	NA	NA	NA	NA	NA	NA
F8W1I5	NA	NA	NA	NA	NA	NA	NA	NA	NA	NA	NA	NA	NA	NA	NA	NA	NA	NA	NA	NA	NA	NA	NA	NA	NA	NA	NA	NA	NA	0.00531658803284144	NA	NA	NA
F8W1I6	NA	NA	NA	NA	0.00345855902723207	NA	NA	NA	NA	NA	NA	NA	0.00378641645668017	0.007326007	NA	NA	NA	NA	NA	0.0020260569316038	NA	0.00413359525854971	NA	NA	NA	NA	NA	NA	NA	NA	NA	0.00305024074052606	0.00679824781548125
F8W1S1	NA	NA	NA	NA	NA	NA	NA	NA	NA	NA	0.000355889738393682	NA	NA	NA	NA	NA	NA	NA	NA	NA	NA	NA	NA	NA	NA	NA	NA	NA	NA	NA	NA	NA	NA
F8W696	0.0292081215385868	NA	NA	NA	NA	0.0142235984167156	0.0106432197313435	NA	NA	NA	NA	0.00331912905149142	NA	0.009081633	NA	0.00321447203058733	0.00310159164664793	0.0112809758322241	0.0062146465558388	NA	NA	0.0102447068744809	NA	NA	NA	0.0186244123397877	NA	NA	0.00662718593425699	0.00569634405507215	0.00718457359663151	NA	0.00284069608051136
F8W6G1	NA	NA	NA	NA	NA	NA	NA	NA	NA	NA	NA	NA	NA	0.003012048	NA	NA	NA	NA	NA	NA	NA	NA	NA	NA	NA	NA	NA	NA	NA	NA	NA	NA	NA
F8W6I7	NA	0.0037005901453225	NA	NA	NA	NA	0.0039312356227826	NA	NA	NA	0.0106899615955309	0.00202285299466948	NA	0.004664179	NA	0.00293860314661811	NA	NA	NA	NA	NA	NA	0.00380514963963918	NA	NA	NA	0.00333877706793362	0.0128922245463548	NA	NA	NA	0.00776786965392673	NA
F8W6P5	NA	NA	NA	NA	NA	NA	NA	NA	NA	NA	NA	0.070275398152354	NA	NA	NA	NA	NA	NA	NA	NA	NA	NA	NA	NA	NA	NA	NA	NA	NA	NA	NA	NA	NA
F8W726	NA	NA	NA	NA	0.00180878662854306	NA	NA	0.00130908039982944	NA	NA	NA	NA	NA	0.002873563	NA	NA	NA	NA	NA	NA	NA	NA	NA	NA	NA	NA	NA	NA	NA	NA	NA	NA	NA
F8W785	NA	NA	NA	NA	0.00151069844411071	0.00063825927711935	0.0021071424539543	0.00218668730509615	0.00281653182651972	NA	NA	0.000867399197573629	0.00206738319514812	0.00376	NA	NA	NA	NA	0.00168009765013594	0.00176996317261247	NA	0.00270833136423528	NA	NA	NA	NA	NA	NA	NA	NA	NA	0.00133234503288604	0.00049491215367035
F8W7C6	NA	NA	NA	NA	0.0115851110978958	0.00978925299554815	NA	NA	NA	NA	NA	0.0188468638601168	0.00317083347018446	0.012269939	NA	NA	NA	NA	NA	NA	NA	NA	0.0156408000018877	NA	NA	NA	NA	NA	NA	NA	NA	0.0102173701752905	0.00711626464478601
F8W7S5	NA	NA	NA	NA	NA	NA	0.00368381495583929	NA	0.00229073022298447	NA	NA	NA	NA	NA	NA	NA	NA	0.00193275494023839	NA	NA	NA	NA	NA	NA	0.00212118999364348	0.000465823736100938	NA	NA	NA	NA	NA	NA	NA
F8W881	NA	NA	NA	NA	NA	NA	NA	NA	NA	NA	NA	NA	NA	0.003120125	NA	NA	NA	NA	NA	NA	NA	NA	NA	NA	NA	NA	NA	NA	NA	NA	NA	NA	NA
F8W8I6	NA	NA	NA	NA	NA	0.0020536016176038	NA	NA	NA	NA	NA	NA	NA	NA	NA	NA	NA	NA	NA	NA	NA	NA	NA	NA	NA	NA	NA	NA	NA	NA	NA	NA	NA
F8W8T1	NA	NA	NA	NA	NA	NA	NA	NA	NA	NA	NA	NA	0.00180399960977784	0.005235602	NA	NA	NA	NA	NA	NA	NA	NA	NA	0.00165357249597508	NA	NA	NA	NA	NA	NA	NA	NA	NA
F8W8Y7	NA	NA	0	NA	NA	NA	NA	NA	NA	NA	NA	NA	NA	NA	NA	NA	NA	NA	NA	NA	NA	NA	NA	NA	NA	NA	NA	NA	NA	NA	NA	NA	NA
F8W914	NA	0.0165293042359203	0.0323410896991442	0.0321187104893402	0.0339575853756117	0.0209953705799567	0.0055451118318346	0.0335675680402165	0.0393758560346825	NA	0.0301569452124912	0.0689544315773731	0.0616587972477615	0.027631579	0.0198712237405198	0.0276331845377332	0.0266628091695836	0.015585558248006	0.019343229911456	0.0116444947895509	NA	0.0296966153013741	0.026836320067646	0.0149604772930532	0.0207110234170286	0.00525891017428044	0.0141283001069411	0.0155869911781925	NA	NA	0.0126331622927149	0.030678997248635	0.0282458259681319
F8W930	NA	NA	NA	NA	NA	NA	NA	NA	NA	NA	NA	0.00490426855758732	0.00678572121054638	NA	0.000786815565875439	NA	NA	NA	NA	0.0006051570460781	NA	NA	NA	NA	NA	NA	NA	NA	NA	NA	NA	NA	NA
F8W9J4	NA	NA	NA	NA	NA	NA	NA	0	NA	NA	NA	NA	NA	NA	NA	NA	NA	NA	NA	NA	NA	NA	NA	NA	NA	NA	NA	NA	NA	NA	NA	NA	NA
F8W9N7	NA	NA	NA	NA	NA	NA	NA	NA	NA	NA	NA	0.00623131560094317	NA	0.005747126	NA	NA	NA	NA	NA	NA	NA	NA	NA	NA	NA	NA	NA	NA	NA	NA	NA	NA	NA
F8W9U4	NA	NA	NA	NA	NA	NA	NA	0.00109973971291548	NA	NA	NA	NA	NA	NA	NA	NA	NA	NA	NA	NA	NA	NA	NA	NA	0.00156452564134625	NA	NA	NA	0.000751172599760785	NA	NA	NA	NA
F8WA66	NA	NA	NA	NA	NA	NA	NA	NA	NA	NA	NA	NA	NA	NA	NA	NA	NA	NA	NA	0.00271134021050607	NA	NA	NA	0.00348344478822211	NA	NA	NA	NA	NA	NA	NA	NA	NA
F8WAM2	NA	NA	NA	NA	0.0144518341817305	NA	NA	NA	NA	NA	NA	NA	NA	NA	NA	NA	NA	NA	NA	NA	NA	NA	NA	NA	NA	NA	NA	NA	NA	NA	0.0195942918890278	NA	NA
F8WAS2	0.0114791315245963	0.0186245680553707	0.0228386800947474	0.00955016405199176	0.00886560085650718	0.00374565328944238	0.0049463441249765	0.00427755761696183	0.0149449192272989	NA	0.00576440645968647	NA	0.0048530125251882	0.004694836	NA	NA	NA	0.0139026101265842	NA	0.0103871074205921	NA	NA	0.00478770070550068	NA	0.0153955176167838	NA	NA	NA	0.0207895051445778	NA	NA	NA	0.00871324725240334
F8WAZ0	NA	NA	NA	NA	NA	NA	0.0242200284727916	NA	NA	NA	NA	NA	NA	0.011494253	NA	NA	NA	NA	NA	NA	NA	NA	NA	NA	NA	NA	NA	NA	NA	NA	NA	NA	NA
F8WB63	NA	NA	0.0512083072180876	NA	NA	NA	NA	NA	NA	NA	NA	0.0338432711217704	NA	NA	NA	NA	NA	NA	NA	NA	NA	NA	NA	NA	NA	NA	NA	NA	NA	NA	NA	NA	NA
F8WBE5	NA	NA	NA	NA	NA	NA	NA	NA	NA	NA	NA	NA	NA	0.012345679	NA	NA	NA	NA	NA	NA	NA	NA	NA	NA	NA	NA	NA	NA	NA	NA	NA	NA	NA
F8WBG8	NA	NA	0.00800105093037346	NA	NA	NA	NA	NA	NA	NA	NA	NA	NA	NA	NA	NA	NA	NA	NA	0.00864239830377181	NA	NA	NA	NA	NA	NA	NA	NA	NA	NA	NA	NA	NA
F8WBP8	NA	NA	NA	NA	0.022751483024307	0.019224677386936	NA	0.0219546922353736	NA	NA	0.0147929937563912	NA	NA	0.024096386	NA	NA	0.0244141394200503	NA	NA	NA	NA	NA	NA	NA	NA	NA	NA	NA	NA	NA	NA	NA	NA
F8WBR5	NA	NA	NA	NA	NA	NA	NA	NA	NA	NA	NA	NA	0.0420292191545984	NA	NA	NA	NA	NA	NA	NA	NA	NA	NA	NA	NA	NA	NA	NA	NA	NA	NA	NA	NA
F8WCR1	NA	0.00550976840922618	NA	NA	0.0157364424408821	NA	NA	0.0253088810484913	NA	NA	NA	NA	0.0172281936374648	0.011111111	0.0239716342694146	NA	NA	NA	0.0175010175389364	0.0122914107980058	NA	NA	0.00849816783446155	NA	0.00546540928519597	NA	NA	0.0109686230926323	NA	NA	NA	NA	0.0154660147777778
F8WD15	NA	NA	NA	NA	0.0116566237854939	NA	NA	NA	NA	NA	NA	NA	NA	NA	NA	NA	NA	NA	NA	NA	NA	NA	NA	NA	NA	NA	NA	NA	NA	NA	NA	NA	NA
F8WDM3	NA	NA	NA	NA	NA	NA	NA	0.00820828567158208	NA	NA	NA	NA	NA	NA	NA	NA	NA	NA	NA	NA	NA	NA	NA	NA	NA	NA	NA	NA	NA	NA	NA	NA	NA
F8WDN6	NA	NA	NA	NA	NA	NA	NA	NA	NA	NA	NA	NA	NA	0.021052632	NA	NA	NA	NA	NA	NA	NA	NA	NA	NA	NA	NA	NA	NA	NA	NA	NA	NA	NA
F8WE04	NA	0.0195447848176998	0.0292861404664896	0.0279471360694992	0.0320583749475099	0.0173335135531832	0.00533904383555014	0.0164165713431642	0.00594706910454997	NA	0.0285753553778482	0.0323739727785105	0.0352130298842135	0.066276544	0.0157921244741364	0.0413875402143031	0.0119802486017549	NA	0.0231048446429086	0.0364382196660761	NA	0.0222390195081572	0.025724184514414	0.0353329752586678	0.016839367686616	0.00675130371013763	0.0246874007010946	0.0205661681752885	0.0239360261155321	NA	0.0113527736840615	0.0121906572732749	0.0131222268947641
F8WE91	NA	NA	NA	NA	NA	NA	NA	NA	NA	NA	NA	NA	NA	NA	NA	NA	NA	NA	NA	NA	NA	NA	NA	NA	NA	NA	NA	NA	NA	NA	NA	NA	0.00124225007860502
F8WEF0	NA	NA	NA	NA	0.00562015794715886	NA	NA	0.0253088810484913	0.0209563381625891	NA	NA	0.0258154525152626	NA	0.027777778	NA	NA	NA	NA	0.0250014533270345	0.0263387378983954	NA	NA	NA	NA	NA	NA	NA	NA	NA	NA	NA	NA	0.0220943065602651
F8WEQ1	NA	NA	NA	NA	0.0449612635772708	NA	NA	NA	0.0209563381625891	NA	NA	NA	NA	NA	NA	NA	NA	NA	NA	0.0526774757967909	NA	NA	NA	NA	NA	NA	NA	NA	NA	NA	NA	NA	NA
F8WEU3	NA	0.0119488946164272	NA	NA	NA	NA	NA	NA	NA	NA	NA	NA	NA	NA	NA	NA	NA	NA	NA	NA	NA	NA	NA	NA	NA	NA	NA	NA	NA	NA	NA	NA	NA
F8WF32	0.0239711253901368	0.0350032321495637	0.062251314186472	0.00598289718156535	0.0305472110194411	0.0657031607391406	0.0371848672063363	0.073246878808832	NA	NA	0.00962994905646859	0.0297636975307622	0.0278691358848091	0.047058824	0.0317271636381802	0.0432378076049941	0.0119198444330989	0.0418059675883565	0.0123536593157126	0.0390433056686492	NA	0.0265522685423392	0.0359922420396845	0.0390145776486007	0.0405083248076345	0.0117552108602512	0.0210539372037259	0.0203242132904208	NA	NA	NA	NA	NA
F8WF69	NA	NA	0.0150292273226085	NA	0.00831359164502912	NA	NA	0.014325781209833	0.0110712725929907	NA	0.00643510722244572	0.00681917589061676	0.0162530120853883	0.028301887	NA	0.00660415724486322	NA	NA	NA	NA	NA	NA	NA	NA	NA	NA	NA	0.012417308937959	NA	NA	NA	NA	0.00437717378360634
F8WJN3	NA	0.00285974081921128	0.00354371845602377	NA	0.00245031133214036	0.00414095518360577	NA	NA	NA	NA	0.00944112612470172	NA	0.00357678793545854	0.015282584	0.00373260786757069	NA	NA	NA	NA	NA	NA	0.00780949041584347	0.00352865154028364	NA	NA	NA	0.00309616755165109	0.00341583459782834	NA	NA	NA	NA	0.00160546880975617
G1UI32	NA	NA	NA	NA	NA	NA	NA	NA	NA	NA	NA	NA	NA	NA	NA	NA	NA	NA	NA	NA	NA	NA	NA	0.00350924797065375	NA	NA	NA	NA	NA	NA	NA	NA	NA
G3V0E4	NA	NA	0.00125506661179691	NA	0.00115709114767077	NA	NA	0.00223313618793524	NA	NA	NA	0.00265747260658627	0.000844518799376823	0.004901961	NA	NA	NA	NA	NA	NA	NA	NA	NA	NA	NA	NA	NA	NA	NA	NA	NA	NA	NA
G3V0E5	NA	NA	0.00442875092819099	NA	NA	NA	NA	NA	NA	NA	NA	NA	NA	NA	NA	NA	NA	NA	NA	NA	NA	NA	NA	NA	NA	NA	NA	NA	NA	NA	NA	NA	NA
G3V113	NA	NA	NA	NA	NA	NA	NA	NA	NA	NA	NA	NA	NA	NA	NA	NA	NA	NA	NA	NA	NA	NA	0.00485609634245525	NA	NA	NA	NA	NA	NA	NA	NA	NA	NA
G3V153	NA	NA	NA	NA	NA	NA	NA	NA	NA	NA	NA	NA	NA	NA	NA	NA	NA	NA	NA	NA	NA	NA	NA	NA	NA	NA	NA	NA	NA	NA	NA	0.00830760928847403	NA
G3V180	NA	NA	NA	NA	0.000765143268905832	NA	NA	0.0014766936262439	NA	NA	NA	NA	0.00167535152200176	0.005726634	NA	NA	NA	NA	NA	NA	NA	NA	NA	NA	NA	NA	NA	NA	NA	NA	NA	NA	0.00150398886514168
G3V192	NA	NA	0.0189654545502833	NA	0.0257131402867426	NA	NA	0.0119100611875208	NA	NA	NA	0.0141731890422084	0.0168903852907608	0.011437908	NA	0.0210633159857872	NA	NA	NA	NA	NA	0.0073756304014212	0.0066652302339668	0.0304478841289164	0.0187538540593905	NA	0.0131587103049325	0.033873688817368	NA	NA	NA	0.0158418122705332	0.0136464830270057
G3V1A4	NA	NA	NA	NA	NA	NA	NA	NA	NA	NA	NA	NA	0.061915180673633	NA	NA	NA	NA	NA	NA	NA	NA	NA	NA	NA	NA	NA	NA	NA	NA	NA	NA	NA	NA
G3V1B3	NA	NA	NA	NA	NA	0.00305679760377758	NA	NA	NA	NA	NA	NA	NA	NA	NA	0.00905225063221898	NA	NA	NA	NA	NA	NA	0.0170940163333333	0.00726051222592425	NA	NA	NA	0.0141835643949819	NA	NA	NA	NA	0.00770337899031152
G3V1C3	NA	NA	0.00213806822521278	NA	0.00197116216243524	NA	NA	0.0028531932401683	NA	NA	NA	NA	0.000719339780602202	NA	NA	NA	NA	NA	NA	NA	NA	NA	NA	NA	NA	NA	NA	NA	NA	NA	NA	NA	0.000968643600526148
G3V1M7	NA	NA	NA	NA	NA	NA	NA	NA	NA	NA	NA	NA	NA	NA	NA	NA	NA	NA	NA	0.001486864200515	NA	NA	NA	NA	NA	NA	NA	NA	NA	NA	NA	NA	NA
G3V1N2	0.464313446220058	0.24944222305226	NA	NA	NA	NA	NA	NA	NA	NA	NA	NA	NA	NA	NA	NA	NA	NA	NA	NA	NA	NA	NA	0.216775800682486	0.0720440254945987	0.173290706375217	NA	NA	NA	NA	NA	NA	NA
G3V1V8	NA	NA	NA	NA	NA	0.0104976856888904	NA	NA	NA	NA	NA	NA	NA	NA	NA	NA	NA	NA	NA	NA	0.0114914670336112	NA	NA	NA	NA	NA	NA	NA	NA	NA	NA	NA	NA
G3V203	NA	NA	NA	NA	NA	NA	NA	NA	NA	NA	NA	NA	NA	NA	NA	NA	NA	NA	NA	NA	NA	NA	NA	NA	NA	NA	NA	NA	NA	NA	NA	NA	0.0405511355041098
G3V220	NA	NA	NA	NA	NA	NA	NA	0.00193580684834305	NA	NA	NA	NA	NA	NA	NA	NA	NA	NA	NA	NA	NA	NA	NA	NA	NA	NA	NA	NA	NA	NA	NA	NA	NA
G3V227	NA	NA	NA	NA	NA	NA	NA	NA	NA	NA	NA	NA	0.0359544906650038	NA	NA	NA	NA	NA	NA	NA	NA	NA	NA	NA	NA	NA	NA	NA	NA	NA	NA	NA	NA
G3V241	NA	NA	NA	NA	0.0136180749894931	NA	NA	NA	NA	NA	NA	NA	NA	NA	NA	NA	NA	NA	NA	NA	NA	NA	NA	NA	NA	NA	NA	NA	NA	NA	NA	NA	NA
G3V279	NA	NA	0.0288488596060676	NA	NA	NA	0.0296780626427165	NA	NA	NA	NA	NA	NA	NA	NA	0.0147895919462645	NA	NA	NA	NA	NA	NA	NA	0.0133450263863982	NA	NA	NA	NA	NA	NA	NA	NA	NA
G3V295	NA	NA	NA	NA	NA	NA	NA	0.00545580669308795	NA	NA	NA	NA	NA	NA	NA	NA	NA	NA	NA	NA	NA	NA	NA	NA	NA	NA	0.00535803790041176	NA	NA	NA	NA	NA	NA
G3V2A3	0.0241742703271676	NA	NA	NA	NA	NA	NA	NA	NA	NA	NA	NA	NA	NA	NA	NA	NA	NA	NA	NA	NA	NA	0.0388899219292829	NA	NA	NA	NA	NA	0.0183464441846769	NA	NA	NA	NA
G3V2D2	NA	NA	NA	NA	0.0121049556511257	NA	NA	0.0175215326831403	NA	NA	NA	NA	NA	NA	NA	NA	NA	NA	NA	NA	NA	NA	NA	NA	NA	NA	NA	NA	NA	NA	NA	NA	NA
G3V2H3	NA	NA	NA	NA	NA	NA	NA	NA	NA	NA	NA	NA	NA	NA	NA	NA	NA	NA	NA	NA	NA	NA	NA	NA	0.00528910525211296	0.0214880192933836	NA	NA	NA	NA	NA	NA	NA
G3V2J8	0.01976723500674	NA	NA	NA	0.0203563461760916	0.0231540990852707	0.00589685396095951	0.0117317076819595	0.010261828631201	NA	0.00488683956314139	0.0194806832962738	0.0174798737665674	0.028243596	0.0064401403406874	NA	0.00831720457428425	0.0176791401865357	NA	0.0183328814064331	NA	0.00364928580164015	0.0106681458440931	NA	0.00209759811911854	NA	0.00801306567887454	0.00589358833584289	NA	NA	NA	NA	0.00265461487151238
G3V2K7	NA	0.00648208024808769	0.0200810688611541	NA	NA	0.00521453680721208	NA	NA	NA	NA	NA	NA	0.0135123080258703	0.006535948	NA	NA	NA	NA	NA	0.0108453630544782	NA	NA	NA	0.0123855796795178	NA	NA	NA	NA	NA	NA	NA	0.00544258615812591	NA
G3V2N5	NA	NA	NA	NA	NA	NA	NA	NA	NA	NA	NA	NA	0.00478277731589943	NA	NA	NA	NA	NA	NA	NA	NA	NA	NA	NA	NA	NA	NA	NA	NA	NA	NA	NA	NA
G3V2N6	0.059635484347695	NA	NA	NA	NA	NA	NA	NA	NA	NA	NA	NA	NA	NA	NA	NA	NA	NA	NA	NA	NA	NA	0.0777271477374966	NA	NA	NA	NA	NA	0.0256509533308275	NA	NA	NA	NA
G3V2Q1	NA	NA	0.00747543437114203	NA	NA	NA	NA	NA	NA	NA	NA	NA	0.0113177911011366	NA	NA	NA	NA	NA	NA	NA	NA	NA	NA	NA	NA	NA	NA	NA	NA	NA	NA	NA	NA
G3V2S6	NA	NA	NA	NA	NA	NA	NA	NA	NA	NA	NA	NA	NA	NA	NA	NA	NA	NA	NA	NA	NA	NA	NA	NA	NA	NA	NA	NA	NA	NA	NA	NA	0.00483312921207267
G3V2T4	NA	NA	NA	NA	NA	NA	NA	NA	NA	NA	NA	NA	NA	NA	NA	NA	NA	NA	NA	NA	NA	NA	0.00504841668677619	NA	NA	NA	NA	NA	NA	NA	NA	NA	NA
G3V2W0	NA	NA	NA	NA	NA	NA	NA	NA	NA	NA	NA	NA	NA	NA	NA	NA	NA	NA	0.0172141156637109	NA	NA	NA	NA	NA	NA	NA	NA	NA	NA	NA	NA	NA	NA
G3V2W1	NA	NA	NA	NA	NA	0.00770844557625714	NA	NA	NA	0.00128463472593121	NA	NA	NA	NA	NA	NA	NA	NA	NA	NA	NA	NA	NA	0.00591231986816692	NA	0.00482701902950937	NA	NA	0.00213920915644039	NA	NA	NA	NA
G3V2W4	NA	0.00833410246771401	0.00286872368410723	NA	NA	0.002514151959843	NA	0.00510431219782882	NA	NA	NA	NA	NA	NA	0.00453245225651818	NA	NA	NA	0.00294134695609299	NA	NA	NA	NA	0.00398107962261142	0.00275566788579724	NA	NA	NA	NA	NA	NA	NA	NA
G3V2X6	NA	NA	NA	NA	NA	NA	NA	NA	NA	NA	0.00818545661614374	NA	0.00689127766172425	NA	NA	NA	NA	NA	NA	NA	NA	NA	NA	NA	NA	NA	NA	NA	NA	NA	NA	NA	NA
G3V2Y1	NA	NA	NA	NA	NA	NA	NA	NA	NA	NA	NA	NA	NA	NA	0.0401063883120443	NA	NA	NA	NA	NA	NA	NA	NA	NA	NA	NA	NA	NA	NA	NA	NA	NA	NA
G3V2Y4	NA	NA	0.0021883214819299	NA	0.0030262386767348	NA	NA	0.00389367372711568	NA	NA	NA	NA	0.00220874258849956	NA	0.00770391676165305	NA	NA	NA	0.00921106501278118	0.00236373271812877	NA	NA	NA	0.00404913169075625	0.0084083217501999	NA	NA	0.00421870096166409	NA	NA	NA	NA	NA
G3V359	NA	NA	NA	NA	NA	NA	NA	NA	NA	NA	NA	NA	0.00801311317551505	NA	NA	0.0101750094888753	NA	NA	NA	0.00803944043693568	NA	NA	NA	NA	NA	NA	NA	NA	NA	NA	NA	NA	NA
G3V361	NA	NA	NA	NA	NA	NA	NA	NA	NA	NA	NA	NA	NA	NA	NA	NA	NA	NA	NA	NA	NA	NA	NA	NA	NA	NA	NA	NA	0.0871114364019923	NA	NA	NA	NA
G3V393	NA	NA	NA	NA	NA	NA	NA	NA	NA	NA	NA	0.0177745741295863	NA	NA	NA	NA	NA	NA	NA	NA	NA	NA	NA	NA	NA	NA	NA	NA	NA	NA	NA	NA	NA
G3V3A0	0.0145775620798639	0.0137072274191738	0.0166525942142943	0.0363483588573568	0.0224586992797865	0.0197834430667384	NA	0.0260743200062037	0.0241611245005636	0.00778300932408978	0.0139751700520503	0.0255635944842551	0.0201695920217266	0.036585366	0.00789309898346835	0.0102444983276849	0.0240587732803176	0.0105931104121596	0.0247575367501878	0.0208654199372418	NA	0.0235786301661348	0.0174108814113707	0.015406453650251	0.0299930974563562	0.0121852794771487	NA	0.0374003299823934	0.0158405883071959	NA	0.0169777374421388	0.0114075273462669	0.0124482554119837
G3V3A4	NA	NA	NA	NA	NA	NA	NA	0.000797828352299409	NA	NA	NA	NA	0.000452579124782655	NA	NA	NA	NA	NA	NA	NA	NA	NA	NA	NA	NA	NA	NA	NA	NA	NA	NA	NA	NA
G3V3E6	NA	NA	0.0015105226297001	NA	0.0041778167192711	NA	NA	NA	NA	NA	NA	0.0023987805541509	0.00228692791986527	0.002212389	NA	NA	NA	NA	NA	NA	NA	NA	NA	NA	NA	NA	NA	NA	NA	NA	NA	NA	NA
G3V3F0	NA	NA	NA	NA	0.00907871697439093	NA	NA	0.00876076679712999	NA	NA	NA	NA	0.00993934268193964	0.019230769	NA	NA	NA	NA	NA	NA	NA	0.0108506869894573	NA	NA	NA	NA	NA	NA	NA	NA	NA	0.00400344034740372	NA
G3V3K9	NA	NA	NA	NA	0.0786822103160374	NA	NA	0.0949083034762827	0.0733471826888957	NA	NA	NA	0.193817174545136	0.208333333	0.0224734069927357	NA	0.0422161156161264	NA	0.0109381360930929	0.046092791322192	NA	0.0235098204939408	NA	0.0394790368273641	NA	NA	NA	NA	NA	NA	NA	0.0346964855089792	NA
G3V3M6	NA	NA	NA	NA	0.00643219612832947	0.0146621663116267	NA	0.00692866723870997	NA	NA	NA	NA	0.0119315299818222	NA	NA	0.0156377913450577	0.00706277195933524	NA	NA	0.00715051625766246	NA	NA	0.0067856091656441	0.00540397452908817	NA	NA	0.00510337821592603	NA	NA	NA	NA	NA	NA
G3V3R6	NA	NA	0.0130048830909333	0.0322886513914897	NA	0.015196649417231	NA	NA	0.0209563381625891	NA	0.0376790859848348	NA	NA	0.041269841	NA	0.00833381777567817	NA	NA	NA	0.010535495601849	NA	NA	NA	NA	NA	NA	NA	NA	NA	NA	NA	0.027757187907554	NA
G3V3W4	NA	NA	NA	NA	NA	0.0221617806328272	0.0877976018969054	NA	0.0122245305948436	NA	NA	0.0225885204087302	NA	NA	NA	NA	NA	NA	0.0145841811074368	NA	NA	NA	NA	NA	NA	NA	NA	NA	NA	NA	NA	NA	NA
G3V3X5	NA	NA	NA	0.00413018180593321	NA	0.00295803416106023	NA	NA	0.00170936196717678	NA	NA	NA	NA	NA	NA	NA	NA	NA	NA	NA	NA	NA	NA	NA	NA	NA	NA	NA	NA	NA	NA	NA	NA
G3V438	NA	NA	NA	NA	0.00232558240347542	NA	NA	NA	NA	NA	NA	NA	0.00763811570620512	0.009852217	NA	NA	NA	NA	NA	0.00544939359019479	NA	NA	0.00251177365375197	NA	NA	NA	NA	NA	NA	NA	NA	0.00615307163764708	NA
G3V445	NA	NA	NA	NA	NA	NA	NA	NA	NA	NA	NA	0.00363841978036727	NA	0.003355705	NA	NA	NA	NA	NA	NA	NA	NA	NA	NA	NA	NA	NA	NA	NA	NA	NA	NA	NA
G3V448	NA	NA	0.016256103607633	NA	0.0299741757181806	NA	NA	NA	NA	NA	NA	0.060236055868946	0.0328156065347172	0.047619048	NA	NA	NA	NA	NA	0.0175591585989303	NA	NA	0.0161869871283307	NA	NA	NA	NA	0.0156694618429536	NA	NA	NA	NA	NA
G3V461	NA	NA	NA	NA	NA	NA	NA	NA	NA	NA	NA	NA	NA	NA	NA	NA	NA	NA	NA	NA	NA	NA	NA	NA	NA	NA	NA	NA	NA	NA	0.00827689959869604	NA	0.0328281514845377
G3V479	NA	NA	NA	NA	NA	NA	NA	NA	NA	NA	0.0346307777395171	NA	NA	NA	NA	NA	NA	NA	NA	NA	NA	NA	NA	NA	NA	NA	NA	NA	NA	NA	NA	NA	NA
G3V4D9	NA	NA	NA	NA	NA	NA	NA	NA	NA	NA	NA	NA	NA	0.002808989	NA	NA	NA	NA	NA	NA	NA	NA	NA	NA	NA	NA	NA	NA	NA	NA	NA	NA	NA
G3V4I9	NA	NA	NA	NA	NA	0.00972956219012786	NA	NA	NA	NA	NA	NA	NA	NA	NA	NA	NA	NA	NA	NA	NA	NA	NA	NA	NA	NA	NA	NA	NA	NA	NA	NA	NA
G3V4K1	NA	NA	NA	NA	NA	NA	NA	NA	NA	NA	NA	NA	NA	0.010309278	NA	NA	NA	NA	NA	NA	NA	NA	NA	NA	NA	NA	NA	NA	NA	NA	NA	NA	NA
G3V4N7	NA	0.0137744200313072	0.0284481813133577	0.00706314198334211	0.0202169568632131	NA	NA	0.0949083034762827	NA	NA	NA	NA	NA	0.029803241	0.011486408042481	NA	0.0128993680694574	0.0671766409637341	0.00692748573726569	0.0140839078142596	NA	NA	0.0116849808998572	0.011514719193085	0.015940776098048	NA	0.0300335387584133	0.00685538906270415	NA	NA	NA	0.031419594558615	0.0363584310614745
G3V4T5	NA	NA	NA	NA	0.00134499465270885	0.00487072089546162	NA	NA	NA	NA	NA	NA	NA	NA	NA	NA	NA	NA	NA	NA	NA	NA	NA	NA	NA	NA	NA	NA	NA	NA	NA	NA	NA
G3V4U0	NA	NA	0.00562711223580053	0.0037256139350465	NA	0.0141250910755332	NA	0.00500615180470306	NA	NA	NA	NA	NA	NA	NA	NA	NA	NA	NA	0.0040521138632076	NA	NA	NA	NA	NA	NA	NA	NA	NA	NA	NA	NA	NA
G3V4W5	NA	NA	NA	NA	NA	NA	NA	NA	NA	NA	NA	NA	NA	NA	NA	NA	NA	NA	0.0197875821379639	NA	NA	NA	NA	NA	NA	NA	NA	NA	NA	NA	NA	NA	NA
G3V4X5	NA	NA	NA	NA	0.00371726991253214	NA	NA	NA	NA	NA	NA	NA	NA	NA	NA	NA	NA	NA	NA	NA	NA	NA	NA	NA	NA	NA	NA	NA	NA	NA	NA	NA	NA
G3V595	NA	NA	0.00511427994777087	0.00190466744398593	0.0035362787970624	0.00298810494907761	NA	0.00170621652586419	0.0118163922488598	NA	NA	0.00521143412993008	0.00387150374684288	NA	NA	0	0.00189735331730708	NA	0.0019664062408787	0.00552422984558681	NA	0.00845296963550054	NA	NA	0.0036845449444145	NA	NA	NA	NA	NA	NA	0	0.00289625773748929
G3V5L0	NA	NA	NA	NA	NA	NA	NA	NA	NA	NA	NA	0.0030628505373233	NA	NA	0.00609448387390461	NA	NA	NA	NA	NA	NA	NA	NA	NA	NA	NA	NA	NA	NA	NA	NA	NA	NA
G3V5M2	NA	NA	NA	NA	NA	NA	NA	NA	NA	NA	NA	NA	NA	NA	0.0209073873343742	NA	NA	NA	NA	NA	NA	NA	NA	NA	NA	NA	0.0124839053595145	0.00967819736906289	NA	0.0129807341351789	NA	0.00690789755986269	NA
G3V5Z7	NA	0.00583387202492728	NA	NA	NA	0.00469308296692605	0.0123949557354454	0.0107190555243286	NA	NA	NA	NA	0.0121610777401291	NA	NA	0.0123536593157126	NA	0.0139353225294522	NA	NA	NA	0.0066380671355848	NA	0.00557351109265724	NA	NA	NA	NA	NA	NA	NA	NA	NA
G3XAI2	NA	0.000761134774511269	0.0021904568024022	NA	0.00144924984070998	0.00211485695607714	NA	NA	0.00131720919964087	NA	NA	0.000832117735212321	NA	0.002391916	NA	NA	NA	NA	NA	0.00127347744042484	NA	NA	NA	NA	NA	NA	NA	NA	NA	NA	NA	0.00159768904062611	0.000712172847837743
G3XAL0	0.00440550471609245	NA	0.0288128448915693	NA	0.0186076787363185	NA	NA	0.008071481047057	0.00634353996744241	NA	NA	0.0019536020112332	0.0136826066491875	NA	NA	0.0232265750680882	NA	NA	0.0103587103158802	0.00597960486440956	NA	0.00304992304296367	0.00436392391285537	0.021211979250499	0.00904008147591721	NA	0.00564283419030954	NA	NA	NA	NA	0.0287699508318425	NA
G3XAL9	NA	NA	NA	NA	NA	NA	NA	NA	NA	NA	NA	NA	NA	0.00317662	NA	NA	NA	NA	NA	NA	NA	NA	NA	NA	NA	NA	NA	NA	NA	NA	NA	NA	NA
G3XAM7	NA	NA	NA	NA	0.00111700665282935	NA	NA	NA	NA	NA	NA	NA	NA	NA	NA	NA	NA	NA	NA	NA	NA	NA	NA	NA	NA	NA	NA	NA	NA	NA	NA	NA	0.000289987771283578
G3XAN0	NA	0.0309924448225017	0.0160021018607469	0.0158920704796123	0.0590116579730747	0.0249320030124746	NA	0.0284724909517728	NA	NA	NA	0.0847069528880497	0.0646057248483786	0.03125	0.0337101110284653	0.0328144072292175	NA	NA	0.0328144072292175	0.0345695932150873	NA	0.0352647313051469	0.047802195980934	NA	0.0153714623848967	0.0312247785352945	0.0838867802072274	0.0462738791347813	NA	NA	NA	0.0130111819617778	0.0724969428208945
G3XAP6	NA	NA	0.0137354709569495	0.0229484335413706	NA	0.00854644330720642	NA	0.0024061259317611	0.00983312168138783	NA	NA	0.00286333354239541	0.00181987918009978	NA	NA	0.00739479649816275	NA	NA	NA	0.0220726045132635	NA	NA	0.000897694137226423	NA	NA	NA	NA	NA	0.00311842515174362	NA	NA	0.00204025075933728	NA
G5E971	NA	NA	0.00343669332637553	NA	NA	NA	NA	NA	NA	NA	NA	NA	NA	NA	NA	NA	NA	NA	0.00643502286448507	NA	NA	NA	NA	NA	NA	NA	NA	NA	NA	NA	NA	NA	NA
G5E972	NA	NA	0.00270220145957259	NA	NA	NA	NA	NA	NA	NA	NA	NA	NA	0.00237467	NA	NA	0.00133665778699905	NA	NA	NA	NA	NA	NA	NA	NA	NA	0.00177069736808363	NA	NA	NA	NA	NA	NA
G5E9A6	NA	NA	NA	NA	NA	0.00103211391837187	NA	0.00235736007149833	NA	NA	0.00211784119829942	NA	0.00200587027555968	0.001293661	NA	NA	NA	NA	NA	NA	NA	NA	NA	NA	NA	NA	NA	NA	NA	NA	NA	NA	NA
G5E9G0	NA	0.00487738963924375	0.00404995326948146	NA	NA	NA	NA	NA	NA	NA	NA	NA	NA	NA	NA	0.00448744001765408	NA	NA	0.00433785882374042	0.00526255295901286	NA	NA	0.00736023694155298	NA	NA	NA	0.00254926601035447	NA	NA	NA	NA	NA	NA
G5E9R0	NA	NA	NA	0.0147139386604212	NA	NA	NA	NA	NA	NA	NA	NA	NA	NA	NA	NA	NA	NA	NA	NA	NA	NA	NA	NA	NA	NA	NA	NA	NA	NA	NA	NA	NA
G5E9U5	NA	NA	NA	NA	0.00240863871555957	NA	NA	NA	NA	NA	NA	NA	NA	NA	NA	NA	NA	NA	NA	NA	NA	NA	NA	NA	NA	NA	NA	NA	NA	NA	NA	NA	NA
G5E9V5	NA	NA	NA	NA	NA	NA	NA	0.00253793762027288	NA	NA	NA	NA	NA	NA	NA	NA	NA	NA	NA	NA	NA	NA	NA	NA	NA	NA	NA	NA	NA	NA	NA	NA	NA
G5E9W2	NA	NA	NA	NA	0.00123584669012185	NA	NA	NA	NA	NA	NA	NA	NA	NA	NA	NA	NA	NA	NA	NA	NA	NA	NA	NA	NA	NA	NA	NA	NA	NA	NA	NA	NA
G5EA20	NA	NA	NA	NA	NA	NA	NA	NA	NA	NA	NA	NA	NA	NA	0.00262463148935196	NA	NA	NA	NA	NA	NA	NA	NA	NA	NA	NA	NA	NA	NA	NA	NA	NA	NA
G5EA31	NA	NA	NA	NA	NA	NA	NA	NA	NA	NA	NA	0.000551780820050506	NA	0.002035623	NA	NA	NA	NA	0.00160314707763765	NA	NA	NA	NA	NA	NA	NA	NA	NA	NA	NA	NA	NA	NA
G8JLB6	NA	NA	NA	NA	0.0140569848177663	NA	NA	NA	NA	NA	NA	0.00911000102488664	NA	NA	NA	NA	NA	NA	NA	NA	NA	NA	NA	NA	NA	NA	NA	NA	NA	NA	NA	0.0100062700974174	NA
G8JLD5	NA	NA	NA	NA	0.000663052156425885	NA	NA	0.00127966216661822	NA	NA	NA	0.000507607431665072	NA	NA	NA	NA	NA	NA	NA	0.000776844580048492	NA	NA	NA	NA	NA	NA	0.000628365223895305	NA	NA	NA	NA	0.00116954412788641	NA
H0Y2P0	NA	0.00544922057726271	0.0112542254957356	0.011176840788047	0.00518783759666158	0.00438364848678582	NA	NA	NA	0.0019481283216785	NA	NA	0.0113592483363489	NA	NA	NA	NA	NA	0.0115391322240112	NA	NA	0.00620039175935316	NA	0.00260301363584196	0.0162160477545499	NA	0.00491644088834679	NA	NA	NA	NA	NA	0.00254934327879079
H0Y2S9	NA	NA	NA	NA	0.000396404439175068	NA	NA	NA	NA	NA	NA	NA	NA	NA	NA	NA	NA	NA	NA	NA	NA	NA	NA	NA	NA	NA	NA	NA	NA	NA	NA	NA	NA
H0Y2V1	NA	NA	NA	NA	NA	0.00206779490827874	NA	0.00192686420838492	NA	NA	NA	NA	NA	NA	NA	NA	NA	NA	NA	NA	NA	NA	0.00446016158830959	NA	NA	NA	NA	NA	NA	NA	NA	NA	NA
H0Y2V6	NA	NA	NA	NA	NA	NA	NA	NA	NA	NA	NA	NA	NA	NA	NA	NA	NA	NA	NA	NA	NA	NA	NA	NA	0.000678464377027579	NA	NA	NA	NA	NA	NA	NA	NA
H0Y2W2	NA	NA	0.000447611305316072	NA	NA	NA	NA	NA	NA	NA	NA	NA	NA	NA	NA	NA	NA	NA	NA	NA	NA	NA	NA	NA	NA	NA	NA	NA	NA	NA	NA	NA	NA
H0Y2Y8	NA	NA	0.00327199508541939	NA	NA	NA	NA	NA	NA	NA	NA	0.00519608116413303	NA	0.004792332	NA	NA	NA	NA	NA	NA	NA	0.00180266986992061	NA	NA	NA	NA	NA	0.00630783407620962	NA	NA	NA	NA	NA
H0Y390	NA	NA	NA	NA	0.000116739222268655	NA	NA	3.75381320708173e-05	NA	NA	NA	NA	0.00038341688737217	8.24e-05	NA	NA	NA	NA	NA	NA	NA	NA	NA	NA	NA	NA	NA	8.13433096683942e-05	NA	NA	NA	NA	7.64639755320538e-05
H0Y3V4	NA	NA	NA	NA	0.00518783759666158	NA	NA	NA	NA	NA	NA	NA	NA	NA	NA	NA	NA	NA	NA	NA	NA	NA	NA	NA	NA	NA	NA	NA	NA	NA	NA	NA	NA
H0Y3Y9	NA	NA	NA	NA	0.0168604738414766	NA	NA	NA	NA	NA	NA	NA	NA	NA	NA	NA	NA	NA	NA	NA	NA	NA	NA	NA	NA	NA	NA	NA	NA	NA	NA	NA	NA
H0Y3Z3	0.00679181956688795	0.0113638961043312	0.0158039809897603	0.0063568281918449	0.0213894911257288	0.0132970685392612	0.0043898804635952	0.0257834222606476	0.00901559163275743	NA	NA	0.0102903264097239	0.0175720935287533	0.009548611	0.00449468183003656	0.00725562980955787	0.00633241729175962	0.0106934247361806	0.0124775770180204	0.0168750833198933	0.0145558580096805	0.0176846093645896	0.0148363851578106	0.015360649756258	0.0145858099723101	0.00416330413777024	0.00875115212690393	0.00522723460454115	0.0110704116798988	NA	NA	0.0125035851511488	0.0138549717070869
H0Y3Z4	NA	NA	NA	NA	0.00195079889159516	NA	NA	NA	NA	NA	NA	0.00298691190607373	NA	NA	NA	NA	NA	NA	0.00578546036080642	NA	NA	NA	NA	NA	NA	NA	NA	0.00815848025548527	NA	NA	NA	NA	NA
H0Y400	NA	NA	NA	NA	NA	NA	NA	NA	NA	NA	NA	NA	NA	NA	NA	NA	NA	NA	NA	NA	NA	NA	NA	NA	NA	NA	NA	0.00527901692624814	NA	NA	NA	NA	NA
H0Y449	NA	0.00198882039167725	0.00342290949988313	NA	0.00378684418518913	NA	0.00281703558597782	0.00487229829692015	0.0023533857337978	NA	0.00218862493438753	0.00579812343068694	NA	0.007130125	0.00336500261265682	NA	NA	NA	0.0112305990915403	NA	NA	NA	NA	NA	NA	NA	NA	NA	NA	NA	NA	NA	0.00196426673533165
H0Y4K8	NA	NA	0.00906313782646962	NA	NA	0.0211811710468225	NA	NA	NA	NA	NA	NA	NA	NA	NA	NA	NA	NA	NA	NA	NA	NA	NA	NA	0.0217649026834203	NA	NA	NA	NA	NA	NA	NA	NA
H0Y4R1	NA	NA	0.00700589532163776	NA	0.0052846261576027	NA	NA	NA	NA	NA	NA	0.00404570490508997	0.00707127334591823	NA	NA	NA	NA	NA	0.00522418383845932	0.00550361641198777	NA	NA	NA	NA	NA	NA	NA	NA	NA	NA	NA	NA	NA
H0Y4W0	NA	NA	NA	NA	0.0151069844411071	NA	NA	NA	NA	NA	NA	NA	NA	NA	NA	NA	NA	NA	NA	NA	NA	NA	NA	NA	NA	NA	NA	NA	NA	NA	NA	NA	NA
H0Y4Y4	NA	NA	NA	NA	NA	NA	NA	NA	NA	NA	NA	NA	0.00577481320947445	0.011173184	NA	NA	NA	NA	NA	NA	NA	NA	NA	NA	NA	NA	NA	NA	NA	NA	NA	NA	NA
H0Y4Z8	NA	NA	NA	NA	NA	NA	NA	NA	NA	NA	NA	NA	0.00270246160517407	NA	NA	NA	NA	NA	NA	NA	NA	NA	NA	NA	NA	NA	NA	NA	NA	NA	NA	NA	NA
H0Y512	NA	NA	NA	NA	0.00823136999383534	NA	NA	0.0136934951088462	NA	NA	NA	NA	0.00689127766172425	0.019948718	0.00331914931059324	0.00592342157934733	NA	NA	0.00807739287182617	0.0127965748808741	NA	0.00983795612854318	0.0031377850936372	NA	NA	NA	NA	0.00632805144249614	NA	NA	NA	0.00533792046320497	0.00808991552215647
H0Y555	NA	NA	NA	NA	NA	NA	NA	NA	NA	NA	NA	NA	NA	NA	NA	NA	NA	NA	NA	NA	NA	NA	0.00317688550533428	NA	NA	NA	NA	NA	NA	NA	NA	NA	NA
H0Y579	NA	NA	NA	NA	NA	NA	NA	NA	NA	NA	NA	0.0097974311526987	NA	NA	NA	NA	NA	NA	NA	NA	NA	NA	NA	NA	NA	NA	NA	NA	NA	NA	NA	NA	NA
H0Y586	NA	NA	NA	NA	NA	NA	NA	NA	NA	NA	NA	NA	NA	NA	NA	NA	NA	NA	NA	NA	NA	NA	0.00181778978568726	NA	NA	NA	NA	NA	NA	NA	NA	NA	NA
H0Y5C6	NA	0.00726465881914143	NA	0.0176151248677959	NA	0.00607280086585808	NA	NA	NA	0.00693977329832937	NA	NA	0.00776013162869117	NA	0.00831756052068549	0.00947392889087732	0.00791239188077724	0.0233247214629813	NA	0.0270698488425176	NA	NA	0.0127018883600141	0.0137122913355931	0.00991942553414538	NA	NA	0.0133106776312095	0.00562806976691798	0.00607024412170689	0.00512519713108906	NA	NA
H0Y5E4	NA	NA	NA	NA	NA	NA	NA	NA	NA	NA	NA	0.00665183398467386	NA	NA	NA	0.0128841848007571	0.00207195680599608	NA	NA	NA	NA	NA	NA	NA	NA	NA	NA	0.0181688850832804	NA	NA	NA	NA	NA
[truncated: 2,306 more rows]
