# Supplementary material for: Comparative Shotgun Proteomics Reveals the Characteristic Protein Signature of Osteosarcoma Subtypes
Source: Cells. 2023 Aug 30;12(17):2179. doi: 10.3390/cells12172179 (PMC10487120; doi:10.3390/cells12172179)
Supplement: Supplementary file 1 [file cells-12-02179-s001.zip › Table S3-Differentially expressed proteins identified upon comparing proteomes of significantly affecting clinical features.xlsx]

## Sheet: DEPs-Histological Response
	FC	log2(FC)	p.ajusted	#NAME?
Q07666	4.071	2.0254	0.0020356	2.6913
P09525	2.1559	1.1083	0.031479	1.502
B4DT28	2.1405	1.098	0.031479	1.502

## Sheet: DEPs-Years to Event
	FC	log2(FC)	p.ajusted	#NAME?
Q9NQT5	0.43403	-1.2041	1.4987e-05	4.8243
H3BQN4	2.4801	1.3104	0.029273	1.5335
E9PEB5	2.3659	1.2424	0.029273	1.5335
A0A3B3ITI4	0.37123	-1.4296	0.02964	1.5281
