# Supplementary material for: Comparative Shotgun Proteomics Reveals the Characteristic Protein Signature of Osteosarcoma Subtypes
Source: Cells. 2023 Aug 30;12(17):2179. doi: 10.3390/cells12172179 (PMC10487120; doi:10.3390/cells12172179)
Supplement: Supplementary file 1 [file cells-12-02179-s001.zip › Table S4-Differentially expressed proteins between pathological subtypes.xlsx]

## Sheet: Sheet1
Gene Name	C.F	C.O	C.T	F.O	F.T	O.T
RPL19	ü	-	-	ü	ü	-			Fibroblastic
POSTN	ü	-	-	ü	ü	-			Chondroblastic
TPM4	ü	-	-	ü	ü	-			Osteoblastic/Telangectatic
RTN4	ü	-	-	ü	ü	-
FLNB	ü	-	-	ü	ü	-
SERBP1	ü	-	-	ü	ü	-
KCTD12	-	-	-	ü	ü	-
LRP1	-	-	-	ü	ü	-
CCT8	ü	-	-	ü	ü	-
HNRNPK	ü	-	-	ü	ü	-
RPL29	ü	-	-	ü	ü	-
HSPB1	ü	-	-	ü	ü	-
LGALS1	-	-	-	ü	ü	-
RPS21	-	-	-	ü	ü	-
RACK1	-	-	-	ü	ü	-
ATP5F1A	ü	-	-	ü	-	-
YWHAE	ü	-	-	-	-	-
AEBP1	ü	ü	ü	-	-	-
TNC	ü	ü	ü	-	-	-
COL12A1	ü	ü	-	-	-	-
COL6A3	-	ü	-	-	-	-
LUM	ü	-	ü	-	-	-
C4B_2	ü	ü	ü	-	-	-
BGN	-	ü	ü	-	-	-
SERPINH1	ü	ü	-	-	-	-
CAT	-	ü	ü	ü	ü	ü
FGG	-	ü	-	ü	ü	-
FGA	-	ü	ü	ü	ü	-
SLC4A1	-	ü	ü	-	ü	-
ACTA2	-	-	-	ü	-	-
RPS5	-	ü	-	ü	ü	-
GSN	-	ü	ü	ü	ü	-
LAMC1	-	ü	-	ü	ü	-
RPL10	-	ü	-	ü	ü	-
MSN	ü	-	-	ü	ü	ü
RPS2	-	ü	ü	ü	ü	-
MYL6	-	ü	-	ü	-	-
PRKCSH	-	ü	-	ü	-	-
TPI1	-	ü	-	ü	-	-
