# Supplementary material for: Comparative Shotgun Proteomics Reveals the Characteristic Protein Signature of Osteosarcoma Subtypes
Source: Cells. 2023 Aug 30;12(17):2179. doi: 10.3390/cells12172179 (PMC10487120; doi:10.3390/cells12172179)
Supplement: Supplementary file 1 [file cells-12-02179-s001.zip › Table S5-Pathway analysis of DEPs between pathological subtypes.csv]

source	term_name	term_id	adjusted_p_value	negative_log10_of_adjusted_p_value	term_size	query_size	intersection_size	effective_domain_size	intersections
KEGG	Coronavirus disease - COVID-19	KEGG:05171	4.31E-06	5.3657382	207	35	5	61498	J3KTE4,C9JC84,P02671,P63220,A0A0G2JL54
KEGG	Focal adhesion	KEGG:04510	0.00010428	3.981799017	192	35	4	61498	P11047,E9PC84,E7EN95,C9JNG9
KEGG	Complement and coagulation cascades	KEGG:04610	0.000210522	3.676702324	83	35	3	61498	C9JC84,P02671,A0A0G2JL54
KEGG	ECM-receptor interaction	KEGG:04512	0.000210522	3.676702324	82	35	3	61498	P11047,E9PC84,C9JNG9
KEGG	PI3K-Akt signaling pathway	KEGG:04151	0.000500988	3.300172693	342	35	4	61498	P11047,E9PC84,C9JNG9,B4DJF2
KEGG	Proteoglycans in cancer	KEGG:05205	0.001797011	2.745449375	200	35	3	61498	P26038,E7EN95,P51884
KEGG	Viral carcinogenesis	KEGG:05203	0.001797011	2.745449375	194	35	3	61498	A0A0A0MS51,P61978,B4DJF2
KEGG	Human papillomavirus infection	KEGG:05165	0.00600075	2.221794496	315	35	3	61498	P11047,E9PC84,C9JNG9
KEGG	Staphylococcus aureus infection	KEGG:05150	0.007456447	2.127468079	84	35	2	61498	C9JC84,A0A0G2JL54
KEGG	Protein digestion and absorption	KEGG:04974	0.009382509	2.027681	99	35	2	61498	D6RGG3,C9JNG9
KEGG	Carbon metabolism	KEGG:01200	0.010969753	1.959803137	112	35	2	61498	P04040,P60174
KEGG	Platelet activation	KEGG:04611	0.011235649	1.949401852	120	35	2	61498	C9JC84,P02671
KEGG	Ribosome	KEGG:03010	0.011235649	1.949401852	127	35	2	61498	J3KTE4,P63220
KEGG	Vascular smooth muscle contraction	KEGG:04270	0.011235649	1.949401852	126	35	2	61498	B7Z6Z4,P62736
KEGG	Measles	KEGG:05162	0.011873966	1.925404182	135	35	2	61498	P26038,D6R909
KEGG	Tight junction	KEGG:04530	0.015387597	1.81282921	159	35	2	61498	P26038,B7Z6Z4
KEGG	Neutrophil extracellular trap formation	KEGG:04613	0.019306284	1.714301302	184	35	2	61498	C9JC84,P02671
KEGG	Chemical carcinogenesis - reactive oxygen species	KEGG:05208	0.021825218	1.661041416	206	35	2	61498	P04040,K7EJP1
KEGG	Regulation of actin cytoskeleton	KEGG:04810	0.021825218	1.661041416	207	35	2	61498	A0A0A0MS51,P26038
KEGG	Prion disease	KEGG:05020	0.02830091	1.548199601	243	35	2	61498	P11047,K7EJP1
KEGG	MicroRNAs in cancer	KEGG:05206	0.041927155	1.377504605	306	35	2	61498	E9PC84,P61978
KEGG	Amyotrophic lateral sclerosis	KEGG:05014	0.04357344	1.360778149	327	35	2	61498	P04040,K7EJP1
KEGG	Collecting duct acid secretion	KEGG:04966	0.04357344	1.360778149	26	35	1	61498	P02730
KEGG	Glyoxylate and dicarboxylate metabolism	KEGG:00630	0.044732864	1.349373291	30	35	1	61498	P04040
KEGG	Fructose and mannose metabolism	KEGG:00051	0.044732864	1.349373291	30	35	1	61498	P60174
KEGG	Alzheimer disease	KEGG:05010	0.044732864	1.349373291	353	35	2	61498	Q07954,K7EJP1
KEGG	Tryptophan metabolism	KEGG:00380	0.059085572	1.228518559	42	35	1	61498	P04040
KEGG	Pathways of neurodegeneration - multiple diseases	KEGG:05022	0.063312508	1.19851048	442	35	2	61498	P04040,K7EJP1
KEGG	Cholesterol metabolism	KEGG:04979	0.063393014	1.197958597	50	35	1	61498	Q07954
KEGG	Malaria	KEGG:05144	0.063393014	1.197958597	49	35	1	61498	Q07954
KEGG	Longevity regulating pathway - multiple species	KEGG:04213	0.071081183	1.148245356	58	35	1	61498	P04040
KEGG	Glycolysis / Gluconeogenesis	KEGG:00010	0.075932155	1.119574273	64	35	1	61498	P60174
KEGG	Cardiac muscle contraction	KEGG:04260	0.081188879	1.090503457	77	35	1	61498	A0A2R8Y5V9
KEGG	Pertussis	KEGG:05133	0.081188879	1.090503457	76	35	1	61498	A0A0G2JL54
KEGG	Biosynthesis of amino acids	KEGG:01230	0.081188879	1.090503457	74	35	1	61498	P60174
KEGG	Inositol phosphate metabolism	KEGG:00562	0.081188879	1.090503457	71	35	1	61498	P60174
KEGG	Peroxisome	KEGG:04146	0.082064623	1.085844021	80	35	1	61498	P04040
KEGG	Dilated cardiomyopathy	KEGG:05414	0.082957467	1.081144516	92	35	1	61498	A0A2R8Y5V9
KEGG	Longevity regulating pathway	KEGG:04211	0.082957467	1.081144516	86	35	1	61498	P04040
KEGG	Fc gamma R-mediated phagocytosis	KEGG:04666	0.082957467	1.081144516	94	35	1	61498	A0A0A0MS51
KEGG	Small cell lung cancer	KEGG:05222	0.082957467	1.081144516	90	35	1	61498	P11047
KEGG	Metabolic pathways	KEGG:01100	0.082957467	1.081144516	1457	35	3	61498	P04040,P60174,K7EJP1
KEGG	Hypertrophic cardiomyopathy	KEGG:05410	0.082957467	1.081144516	88	35	1	61498	A0A2R8Y5V9
KEGG	Amoebiasis	KEGG:05146	0.083633847	1.077617926	97	35	1	61498	P11047
KEGG	Oocyte meiosis	KEGG:04114	0.089404189	1.048642131	123	35	1	61498	B4DJF2
KEGG	Spliceosome	KEGG:03040	0.089404189	1.048642131	123	35	1	61498	P61978
KEGG	Toxoplasmosis	KEGG:05145	0.089404189	1.048642131	107	35	1	61498	P11047
KEGG	Oxidative phosphorylation	KEGG:00190	0.089404189	1.048642131	118	35	1	61498	K7EJP1
KEGG	Cell cycle	KEGG:04110	0.089404189	1.048642131	120	35	1	61498	B4DJF2
KEGG	Neurotrophin signaling pathway	KEGG:04722	0.089404189	1.048642131	115	35	1	61498	B4DJF2
KEGG	Relaxin signaling pathway	KEGG:04926	0.089404189	1.048642131	123	35	1	61498	P62736
KEGG	Leukocyte transendothelial migration	KEGG:04670	0.089404189	1.048642131	110	35	1	61498	P26038
KEGG	FoxO signaling pathway	KEGG:04068	0.089532688	1.048018375	128	35	1	61498	P04040
KEGG	Systemic lupus erythematosus	KEGG:05322	0.089532688	1.048018375	127	35	1	61498	A0A0G2JL54
KEGG	Apelin signaling pathway	KEGG:04371	0.092565362	1.033551496	135	35	1	61498	P62736
KEGG	Adrenergic signaling in cardiomyocytes	KEGG:04261	0.094377863	1.025129861	144	35	1	61498	A0A2R8Y5V9
KEGG	Oxytocin signaling pathway	KEGG:04921	0.094377863	1.025129861	148	35	1	61498	B7Z6Z4
KEGG	Alcoholic liver disease	KEGG:04936	0.094377863	1.025129861	141	35	1	61498	A0A0G2JL54
KEGG	Hippo signaling pathway	KEGG:04390	0.094377863	1.025129861	148	35	1	61498	B4DJF2
KEGG	Hepatitis C	KEGG:05160	0.094880523	1.022822929	152	35	1	61498	B4DJF2
KEGG	Protein processing in endoplasmic reticulum	KEGG:04141	0.094880523	1.022822929	154	35	1	61498	K7ELL7
KEGG	NOD-like receptor signaling pathway	KEGG:04621	0.105501251	0.976742391	175	35	1	61498	B4DJF2
KEGG	Diabetic cardiomyopathy	KEGG:05415	0.110611942	0.956197982	187	35	1	61498	K7EJP1
KEGG	Thermogenesis	KEGG:04714	0.11990418	0.921165678	207	35	1	61498	K7EJP1
KEGG	Salmonella infection	KEGG:05132	0.132624743	0.877375446	236	35	1	61498	E7EN95
KEGG	Parkinson disease	KEGG:05012	0.132624743	0.877375446	238	35	1	61498	K7EJP1
KEGG	Huntington disease	KEGG:05016	0.147973746	0.829815331	272	35	1	61498	K7EJP1
KEGG	MAPK signaling pathway	KEGG:04010	0.152756192	0.816001178	286	35	1	61498	E7EN95
KEGG	Pathways in cancer	KEGG:05200	0.255887493	0.59195094	517	35	1	61498	P11047
REAC	Extracellular matrix organization	REAC:R-HSA-1474244	1.19E-11	10.92364931	298	35	9	61498	P11047,E9PC84,C9JC84,P02671,D6RGG3,C9JNG9,P51884,P21810,E9PKH2
REAC	Disease	REAC:R-HSA-1643685	1.79E-11	10.74811619	1694	35	14	61498	M0QZN2,J3KTE4,P26038,E9PM36,A0A2R8Y5V9,P02730,K7ELL7,C9JC84,P02671,P61978,P63220,P51884,P21810,B4DJF2
REAC	Metabolism of proteins	REAC:R-HSA-392499	1.69E-09	8.773378623	1944	35	13	61498	M0QZN2,J3KTE4,A0A0A0MS51,P11047,E9PM36,E9PC84,K7ELL7,C9JC84,P02671,P50990,P61978,P09382,P63220
REAC	Post-translational protein phosphorylation	REAC:R-HSA-8957275	2.17E-09	8.664161086	107	35	6	61498	P11047,E9PC84,K7ELL7,C9JC84,P02671,P09382
REAC	Regulation of Insulin-like Growth Factor (IGF) transport and uptake by Insulin-like Growth Factor Binding Proteins (IGFBPs)	REAC:R-HSA-381426	4.43E-09	8.353478742	124	35	6	61498	P11047,E9PC84,K7ELL7,C9JC84,P02671,P09382
REAC	ECM proteoglycans	REAC:R-HSA-3000178	2.68E-08	7.571191336	75	35	5	61498	P11047,E9PC84,C9JNG9,P51884,P21810
REAC	Axon guidance	REAC:R-HSA-422475	2.68E-08	7.571191336	549	35	8	61498	M0QZN2,J3KTE4,P11047,P26038,E9PM36,B7Z6Z4,P63220,C9JNG9
REAC	Nervous system development	REAC:R-HSA-9675108	3.32E-08	7.47851193	574	35	8	61498	M0QZN2,J3KTE4,P11047,P26038,E9PM36,B7Z6Z4,P63220,C9JNG9
REAC	Integrin cell surface interactions	REAC:R-HSA-216083	3.83E-08	7.417151454	84	35	5	61498	E9PC84,C9JC84,P02671,C9JNG9,P51884
REAC	Developmental Biology	REAC:R-HSA-1266738	4.59E-06	5.337918507	1116	35	8	61498	M0QZN2,J3KTE4,P11047,P26038,E9PM36,B7Z6Z4,P63220,C9JNG9
REAC	Selenocysteine synthesis	REAC:R-HSA-2408557	4.67E-06	5.330948171	94	35	4	61498	M0QZN2,J3KTE4,E9PM36,P63220
REAC	Viral mRNA Translation	REAC:R-HSA-192823	4.67E-06	5.330948171	90	35	4	61498	M0QZN2,J3KTE4,E9PM36,P63220
REAC	Peptide chain elongation	REAC:R-HSA-156902	4.67E-06	5.330948171	90	35	4	61498	M0QZN2,J3KTE4,E9PM36,P63220
REAC	Eukaryotic Translation Termination	REAC:R-HSA-72764	4.67E-06	5.330948171	94	35	4	61498	M0QZN2,J3KTE4,E9PM36,P63220
REAC	Eukaryotic Translation Elongation	REAC:R-HSA-156842	4.67E-06	5.330948171	94	35	4	61498	M0QZN2,J3KTE4,E9PM36,P63220
REAC	Nonsense Mediated Decay (NMD) independent of the Exon Junction Complex (EJC)	REAC:R-HSA-975956	4.78E-06	5.32046175	96	35	4	61498	M0QZN2,J3KTE4,E9PM36,P63220
REAC	Formation of a pool of free 40S subunits	REAC:R-HSA-72689	5.46E-06	5.262866091	102	35	4	61498	M0QZN2,J3KTE4,E9PM36,P63220
REAC	Response of EIF2AK4 (GCN2) to amino acid deficiency	REAC:R-HSA-9633012	5.46E-06	5.262866091	102	35	4	61498	M0QZN2,J3KTE4,E9PM36,P63220
REAC	SRP-dependent cotranslational protein targeting to membrane	REAC:R-HSA-1799339	7.11E-06	5.148006119	113	35	4	61498	M0QZN2,J3KTE4,E9PM36,P63220
REAC	GTP hydrolysis and joining of the 60S ribosomal subunit	REAC:R-HSA-72706	7.11E-06	5.148006119	113	35	4	61498	M0QZN2,J3KTE4,E9PM36,P63220
REAC	L13a-mediated translational silencing of Ceruloplasmin expression	REAC:R-HSA-156827	7.11E-06	5.148006119	112	35	4	61498	M0QZN2,J3KTE4,E9PM36,P63220
REAC	Nonsense-Mediated Decay (NMD)	REAC:R-HSA-927802	7.19E-06	5.142989502	116	35	4	61498	M0QZN2,J3KTE4,E9PM36,P63220
REAC	Nonsense Mediated Decay (NMD) enhanced by the Exon Junction Complex (EJC)	REAC:R-HSA-975957	7.19E-06	5.142989502	116	35	4	61498	M0QZN2,J3KTE4,E9PM36,P63220
REAC	Selenoamino acid metabolism	REAC:R-HSA-2408522	7.19E-06	5.142989502	117	35	4	61498	M0QZN2,J3KTE4,E9PM36,P63220
REAC	Eukaryotic Translation Initiation	REAC:R-HSA-72613	7.37E-06	5.132389068	120	35	4	61498	M0QZN2,J3KTE4,E9PM36,P63220
REAC	Cap-dependent Translation Initiation	REAC:R-HSA-72737	7.37E-06	5.132389068	120	35	4	61498	M0QZN2,J3KTE4,E9PM36,P63220
REAC	Post-translational protein modification	REAC:R-HSA-597592	1.04E-05	4.984855587	1414	35	8	61498	P11047,E9PM36,E9PC84,K7ELL7,C9JC84,P02671,P61978,P09382
REAC	Influenza Viral RNA Transcription and Replication	REAC:R-HSA-168273	1.04E-05	4.984855587	133	35	4	61498	M0QZN2,J3KTE4,E9PM36,P63220
REAC	Smooth Muscle Contraction	REAC:R-HSA-445355	1.35E-05	4.86851988	38	35	3	61498	A0A2R8Y5V9,B7Z6Z4,P62736
REAC	Immune System	REAC:R-HSA-168256	1.45E-05	4.839796002	2041	35	9	61498	P04040,A0A0A0MS51,P26038,E7EN95,K7ELL7,C9JC84,P02671,P50990,A0A0G2JL54
REAC	Influenza Infection	REAC:R-HSA-168255	1.56E-05	4.807991335	152	35	4	61498	M0QZN2,J3KTE4,E9PM36,P63220
REAC	Metabolism	REAC:R-HSA-1430728	1.56E-05	4.807991335	2075	35	9	61498	M0QZN2,J3KTE4,E9PM36,Q07954,P60174,P63220,P51884,K7EJP1,P21810
REAC	Cellular response to starvation	REAC:R-HSA-9711097	1.71E-05	4.766902418	157	35	4	61498	M0QZN2,J3KTE4,E9PM36,P63220
REAC	Innate Immune System	REAC:R-HSA-168249	1.99E-05	4.701558778	1094	35	7	61498	P04040,A0A0A0MS51,K7ELL7,C9JC84,P02671,P50990,A0A0G2JL54
REAC	Regulation of expression of SLITs and ROBOs	REAC:R-HSA-9010553	2.27E-05	4.644412863	171	35	4	61498	M0QZN2,J3KTE4,E9PM36,P63220
REAC	Formation of the ternary complex, and subsequently, the 43S complex	REAC:R-HSA-72695	2.78E-05	4.555298616	52	35	3	61498	M0QZN2,E9PM36,P63220
REAC	Major pathway of rRNA processing in the nucleolus and cytosol	REAC:R-HSA-6791226	2.78E-05	4.555298616	182	35	4	61498	M0QZN2,J3KTE4,E9PM36,P63220
REAC	Cellular responses to stress	REAC:R-HSA-2262752	2.89E-05	4.538809204	751	35	6	61498	M0QZN2,J3KTE4,P04040,E9PM36,P63220,B4DJF2
REAC	Cellular responses to stimuli	REAC:R-HSA-8953897	3.13E-05	4.503984469	765	35	6	61498	M0QZN2,J3KTE4,P04040,E9PM36,P63220,B4DJF2
REAC	rRNA processing in the nucleus and cytosol	REAC:R-HSA-8868773	3.15E-05	4.501661817	192	35	4	61498	M0QZN2,J3KTE4,E9PM36,P63220
REAC	rRNA processing	REAC:R-HSA-72312	3.59E-05	4.445200791	202	35	4	61498	M0QZN2,J3KTE4,E9PM36,P63220
REAC	Ribosomal scanning and start codon recognition	REAC:R-HSA-72702	3.59E-05	4.445200791	59	35	3	61498	M0QZN2,E9PM36,P63220
REAC	Translation initiation complex formation	REAC:R-HSA-72649	3.59E-05	4.445200791	59	35	3	61498	M0QZN2,E9PM36,P63220
REAC	Activation of the mRNA upon binding of the cap-binding complex and eIFs, and subsequent binding to 43S	REAC:R-HSA-72662	3.63E-05	4.440195089	60	35	3	61498	M0QZN2,E9PM36,P63220
REAC	Signaling by ROBO receptors	REAC:R-HSA-376176	4.55E-05	4.341796584	217	35	4	61498	M0QZN2,J3KTE4,E9PM36,P63220
REAC	Collagen biosynthesis and modifying enzymes	REAC:R-HSA-1650814	4.85E-05	4.314165352	67	35	3	61498	D6RGG3,C9JNG9,E9PKH2
REAC	Signal Transduction	REAC:R-HSA-162582	5.23E-05	4.281170639	2523	35	9	61498	P11047,A0A2R8Y5V9,B7Z6Z4,C9JC84,P02671,P62736,C9JNG9,D6R909,B4DJF2
REAC	Infectious disease	REAC:R-HSA-5663205	7.11E-05	4.147940745	916	35	6	61498	M0QZN2,J3KTE4,E9PM36,K7ELL7,P61978,P63220
REAC	Collagen formation	REAC:R-HSA-1474290	0.000107176	3.969903614	89	35	3	61498	D6RGG3,C9JNG9,E9PKH2
REAC	Translation	REAC:R-HSA-72766	0.000131544	3.880930008	292	35	4	61498	M0QZN2,J3KTE4,E9PM36,P63220
REAC	GRB2:SOS provides linkage to MAPK signaling for Integrins	REAC:R-HSA-354194	0.000158454	3.800096479	14	35	2	61498	C9JC84,P02671
REAC	p130Cas linkage to MAPK signaling for integrins	REAC:R-HSA-372708	0.000179318	3.746376433	15	35	2	61498	C9JC84,P02671
REAC	Metabolism of RNA	REAC:R-HSA-8953854	0.000188	3.725841507	661	35	5	61498	M0QZN2,J3KTE4,E9PM36,P61978,P63220
REAC	MyD88 deficiency (TLR2/4)	REAC:R-HSA-5602498	0.000223654	3.650424297	17	35	2	61498	C9JC84,P02671
REAC	IRAK4 deficiency (TLR2/4)	REAC:R-HSA-5603041	0.000247029	3.607252431	18	35	2	61498	C9JC84,P02671
REAC	Metabolism of amino acids and derivatives	REAC:R-HSA-71291	0.000295316	3.529712421	370	35	4	61498	M0QZN2,J3KTE4,E9PM36,P63220
REAC	Regulation of TLR by endogenous ligand	REAC:R-HSA-5686938	0.000327016	3.485430462	21	35	2	61498	C9JC84,P02671
REAC	Common Pathway of Fibrin Clot Formation	REAC:R-HSA-140875	0.000347603	3.458916332	22	35	2	61498	C9JC84,P02671
REAC	Degradation of the extracellular matrix	REAC:R-HSA-1474228	0.000347603	3.458916332	140	35	3	61498	P11047,D6RGG3,C9JNG9
REAC	Diseases of signal transduction by growth factor receptors and second messengers	REAC:R-HSA-5663202	0.00043767	3.358853262	417	35	4	61498	P26038,A0A2R8Y5V9,C9JC84,P02671
REAC	Integrin signaling	REAC:R-HSA-354192	0.0004726	3.325506536	26	35	2	61498	C9JC84,P02671
REAC	Diseases associated with the TLR signaling cascade	REAC:R-HSA-5602358	0.000653881	3.184501546	31	35	2	61498	C9JC84,P02671
REAC	Diseases of Immune System	REAC:R-HSA-5260271	0.000653881	3.184501546	31	35	2	61498	C9JC84,P02671
REAC	Signaling by high-kinase activity BRAF mutants	REAC:R-HSA-6802948	0.000822637	3.084791878	35	35	2	61498	C9JC84,P02671
REAC	Muscle contraction	REAC:R-HSA-397014	0.000834809	3.078412694	195	35	3	61498	A0A2R8Y5V9,B7Z6Z4,P62736
REAC	Platelet Aggregation (Plug Formation)	REAC:R-HSA-76009	0.000941932	3.025980634	38	35	2	61498	C9JC84,P02671
REAC	Formation of Fibrin Clot (Clotting Cascade)	REAC:R-HSA-140877	0.000963724	3.016047251	39	35	2	61498	C9JC84,P02671
REAC	MAP2K and MAPK activation	REAC:R-HSA-5674135	0.000963724	3.016047251	39	35	2	61498	C9JC84,P02671
REAC	Signaling by RAF1 mutants	REAC:R-HSA-9656223	0.000999597	3.000175013	40	35	2	61498	C9JC84,P02671
REAC	Diseases associated with glycosaminoglycan metabolism	REAC:R-HSA-3560782	0.001035687	2.984771275	41	35	2	61498	P51884,P21810
REAC	Signaling by moderate kinase activity BRAF mutants	REAC:R-HSA-6802946	0.001166471	2.933125935	45	35	2	61498	C9JC84,P02671
REAC	Signaling downstream of RAS mutants	REAC:R-HSA-9649948	0.001166471	2.933125935	45	35	2	61498	C9JC84,P02671
REAC	Collagen chain trimerization	REAC:R-HSA-8948216	0.001166471	2.933125935	44	35	2	61498	D6RGG3,C9JNG9
REAC	Paradoxical activation of RAF signaling by kinase inactive BRAF	REAC:R-HSA-6802955	0.001166471	2.933125935	45	35	2	61498	C9JC84,P02671
REAC	Signaling by RAS mutants	REAC:R-HSA-6802949	0.001166471	2.933125935	45	35	2	61498	C9JC84,P02671
REAC	Sensory processing of sound by outer hair cells of the cochlea	REAC:R-HSA-9662361	0.001557519	2.807566685	53	35	2	61498	A0A0A0MS51,P26038
REAC	Signaling by ALK fusions and activated point mutants	REAC:R-HSA-9725370	0.001557519	2.807566685	53	35	2	61498	P26038,A0A2R8Y5V9
REAC	Signaling by ALK in cancer	REAC:R-HSA-9700206	0.001557519	2.807566685	53	35	2	61498	P26038,A0A2R8Y5V9
REAC	Non-integrin membrane-ECM interactions	REAC:R-HSA-3000171	0.001841698	2.734781575	58	35	2	61498	P11047,E9PC84
REAC	Assembly of collagen fibrils and other multimeric structures	REAC:R-HSA-2022090	0.001946317	2.71078641	60	35	2	61498	D6RGG3,C9JNG9
REAC	Defective SLC4A1 causes HSP4, dRTA and dRTA-HA	REAC:R-HSA-5619050	0.002005816	2.697708957	1	35	1	61498	P02730	Defective SLC4A1 causes hereditary spherocytosis type 4 (HSP4), distal renal tubular acidosis (dRTA) and dRTA with hemolytic anemia (dRTA-HA)
REAC	Metabolism of carbohydrates	REAC:R-HSA-71387	0.002010945	2.696599799	285	35	3	61498	P60174,P51884,P21810
REAC	Collagen degradation	REAC:R-HSA-1442490	0.00210292	2.677177311	64	35	2	61498	D6RGG3,C9JNG9
REAC	Organelle biogenesis and maintenance	REAC:R-HSA-1852241	0.00210292	2.677177311	293	35	3	61498	P50990,K7EJP1,B4DJF2
REAC	Signaling by BRAF and RAF1 fusions	REAC:R-HSA-6802952	0.00210292	2.677177311	64	35	2	61498	C9JC84,P02671
REAC	Sensory processing of sound	REAC:R-HSA-9659379	0.002751438	2.560440269	74	35	2	61498	A0A0A0MS51,P26038
REAC	Oncogenic MAPK signaling	REAC:R-HSA-6802957	0.003335036	2.476899485	82	35	2	61498	C9JC84,P02671
REAC	ER-Phagosome pathway	REAC:R-HSA-1236974	0.003965401	2.401712935	90	35	2	61498	C9JC84,P02671
REAC	RHO GTPases activate PKNs	REAC:R-HSA-5625740	0.004273592	2.369206909	94	35	2	61498	B7Z6Z4,B4DJF2
REAC	Toll Like Receptor TLR6:TLR2 Cascade	REAC:R-HSA-168188	0.004724357	2.325657315	100	35	2	61498	C9JC84,P02671
REAC	MyD88:MAL(TIRAP) cascade initiated on plasma membrane	REAC:R-HSA-166058	0.004724357	2.325657315	100	35	2	61498	C9JC84,P02671
REAC	Toll Like Receptor 2 (TLR2) Cascade	REAC:R-HSA-181438	0.004901626	2.309659811	103	35	2	61498	C9JC84,P02671
REAC	Toll Like Receptor TLR1:TLR2 Cascade	REAC:R-HSA-168179	0.004901626	2.309659811	103	35	2	61498	C9JC84,P02671
REAC	Antigen processing-Cross presentation	REAC:R-HSA-1236975	0.005132602	2.28966242	106	35	2	61498	C9JC84,P02671
REAC	Amyloid fiber formation	REAC:R-HSA-977225	0.005463797	2.262505457	110	35	2	61498	A0A0A0MS51,P02671
REAC	L1CAM interactions	REAC:R-HSA-373760	0.006312631	2.199789584	119	35	2	61498	P11047,P26038
REAC	Glycosaminoglycan metabolism	REAC:R-HSA-1630316	0.006667651	2.176027112	123	35	2	61498	P51884,P21810
REAC	Platelet degranulation	REAC:R-HSA-114608	0.006812727	2.166679024	125	35	2	61498	C9JC84,P02671
REAC	Response to elevated platelet cytosolic Ca2+	REAC:R-HSA-76005	0.007212111	2.141937621	130	35	2	61498	C9JC84,P02671
REAC	Neutrophil degranulation	REAC:R-HSA-6798695	0.007212111	2.141937621	476	35	3	61498	P04040,A0A0A0MS51,P50990
REAC	Toll Like Receptor 4 (TLR4) Cascade	REAC:R-HSA-166016	0.007358449	2.133213732	132	35	2	61498	C9JC84,P02671
REAC	Maturation of spike protein	REAC:R-HSA-9683686	0.007975491	2.098242552	5	35	1	61498	K7ELL7
REAC	Death Receptor Signalling	REAC:R-HSA-73887	0.008021527	2.09574295	140	35	2	61498	D6R909,B4DJF2
REAC	Diseases of glycosylation	REAC:R-HSA-3781865	0.008021527	2.09574295	140	35	2	61498	P51884,P21810
REAC	TNFR1-mediated ceramide production	REAC:R-HSA-5626978	0.009210265	2.035727891	6	35	1	61498	D6R909
REAC	NADE modulates death signalling	REAC:R-HSA-205025	0.009210265	2.035727891	6	35	1	61498	B4DJF2
REAC	Sensory Perception	REAC:R-HSA-9709957	0.00922636	2.034969588	533	35	3	61498	A0A0A0MS51,P26038,Q07954
REAC	Toll-like Receptor Cascades	REAC:R-HSA-168898	0.009309449	2.031076012	154	35	2	61498	C9JC84,P02671
REAC	Protein localization	REAC:R-HSA-9609507	0.00969804	2.013316047	158	35	2	61498	P04040,K7EJP1
REAC	Activation of C3 and C5	REAC:R-HSA-174577	0.010355228	1.984840325	7	35	1	61498	A0A0G2JL54
REAC	Defective CHST3 causes SEDCJD	REAC:R-HSA-3595172	0.011153385	1.952593325	8	35	1	61498	P21810
REAC	Defective ST3GAL3 causes MCT12 and EIEE15	REAC:R-HSA-3656243	0.011153385	1.952593325	8	35	1	61498	P51884
REAC	Defective CHSY1 causes TPBS	REAC:R-HSA-3595177	0.011153385	1.952593325	8	35	1	61498	P21810
REAC	Defective CHST6 causes MCDC1	REAC:R-HSA-3656225	0.011153385	1.952593325	8	35	1	61498	P51884
REAC	Defective CHST14 causes EDS, musculocontractural type	REAC:R-HSA-3595174	0.011153385	1.952593325	8	35	1	61498	P21810
REAC	Defective B4GALT1 causes B4GALT1-CDG (CDG-2d)	REAC:R-HSA-3656244	0.011153385	1.952593325	8	35	1	61498	P51884
REAC	Apoptosis	REAC:R-HSA-109581	0.011153385	1.952593325	176	35	2	61498	A0A0A0MS51,B4DJF2
REAC	Erythrocytes take up oxygen and release carbon dioxide	REAC:R-HSA-1247673	0.012411954	1.906159854	9	35	1	61498	P02730
REAC	Folding of actin by CCT/TriC	REAC:R-HSA-390450	0.013559361	1.867760766	10	35	1	61498	P50990
REAC	Bicarbonate transporters	REAC:R-HSA-425381	0.013559361	1.867760766	10	35	1	61498	P02730
REAC	Cilium Assembly	REAC:R-HSA-5617833	0.013955429	1.855256808	201	35	2	61498	P50990,B4DJF2
REAC	Programmed Cell Death	REAC:R-HSA-5357801	0.014379323	1.84226157	205	35	2	61498	A0A0A0MS51,B4DJF2
REAC	Dermatan sulfate biosynthesis	REAC:R-HSA-2022923	0.014550423	1.837124379	11	35	1	61498	P21810
REAC	HSF1 activation	REAC:R-HSA-3371511	0.015616919	1.806404652	12	35	1	61498	B4DJF2
REAC	Caspase-mediated cleavage of cytoskeletal proteins	REAC:R-HSA-264870	0.015616919	1.806404652	12	35	1	61498	A0A0A0MS51
REAC	Signaling by Rho GTPases	REAC:R-HSA-194315	0.016177034	1.791101115	702	35	3	61498	A0A2R8Y5V9,B7Z6Z4,B4DJF2
REAC	Erythrocytes take up carbon dioxide and release oxygen	REAC:R-HSA-1237044	0.016177034	1.791101115	13	35	1	61498	P02730
REAC	Advanced glycosylation endproduct receptor signaling	REAC:R-HSA-879415	0.016177034	1.791101115	13	35	1	61498	K7ELL7
REAC	Keratan sulfate degradation	REAC:R-HSA-2022857	0.016177034	1.791101115	13	35	1	61498	P51884
REAC	O2/CO2 exchange in erythrocytes	REAC:R-HSA-1480926	0.016177034	1.791101115	13	35	1	61498	P02730
REAC	Chk1/Chk2(Cds1) mediated inactivation of Cyclin B:Cdk1 complex	REAC:R-HSA-75035	0.016177034	1.791101115	13	35	1	61498	B4DJF2
REAC	Signaling by Rho GTPases, Miro GTPases and RHOBTB3	REAC:R-HSA-9716542	0.017009401	1.76931098	717	35	3	61498	A0A2R8Y5V9,B7Z6Z4,B4DJF2
REAC	CS/DS degradation	REAC:R-HSA-2024101	0.017122531	1.766432033	14	35	1	61498	P21810
REAC	Diseases of metabolism	REAC:R-HSA-5668914	0.017889603	1.747399308	241	35	2	61498	P51884,P21810
REAC	Activation of BAD and translocation to mitochondria	REAC:R-HSA-111447	0.01807079	1.743022864	15	35	1	61498	B4DJF2
REAC	Platelet activation, signaling and aggregation	REAC:R-HSA-76002	0.020087153	1.697081603	258	35	2	61498	C9JC84,P02671
REAC	Protein methylation	REAC:R-HSA-8876725	0.020172269	1.695245239	17	35	1	61498	E9PM36
REAC	RAF/MAP kinase cascade	REAC:R-HSA-5673001	0.020687435	1.684293347	264	35	2	61498	C9JC84,P02671
REAC	Formation of ATP by chemiosmotic coupling	REAC:R-HSA-163210	0.021047934	1.67679052	18	35	1	61498	K7EJP1
REAC	MAPK1/MAPK3 signaling	REAC:R-HSA-5684996	0.02113779	1.674940413	269	35	2	61498	C9JC84,P02671
REAC	RHO GTPases activate CIT	REAC:R-HSA-5625900	0.02144523	1.668669296	19	35	1	61498	B7Z6Z4
REAC	Signaling by Hippo	REAC:R-HSA-2028269	0.02144523	1.668669296	19	35	1	61498	B4DJF2
REAC	RHO GTPases Activate ROCKs	REAC:R-HSA-5627117	0.02144523	1.668669296	19	35	1	61498	B7Z6Z4
REAC	Chondroitin sulfate biosynthesis	REAC:R-HSA-2022870	0.02144523	1.668669296	19	35	1	61498	P21810
REAC	Defective B3GALT6 causes EDSP2 and SEMDJL1	REAC:R-HSA-4420332	0.021815438	1.661236053	20	35	1	61498	P21810
REAC	Defective B4GALT7 causes EDS, progeroid type	REAC:R-HSA-3560783	0.021815438	1.661236053	20	35	1	61498	P21810
REAC	Defective B3GAT3 causes JDSSDHD	REAC:R-HSA-3560801	0.021815438	1.661236053	20	35	1	61498	P21810
REAC	NOTCH4 Intracellular Domain Regulates Transcription	REAC:R-HSA-9013695	0.021815438	1.661236053	20	35	1	61498	P62736
REAC	Sema4D induced cell migration and growth-cone collapse	REAC:R-HSA-416572	0.021815438	1.661236053	20	35	1	61498	B7Z6Z4
REAC	RHO GTPases activate PAKs	REAC:R-HSA-5627123	0.022450871	1.648766811	21	35	1	61498	B7Z6Z4
REAC	Neurodegenerative Diseases	REAC:R-HSA-8863678	0.022450871	1.648766811	21	35	1	61498	B4DJF2
REAC	Deregulated CDK5 triggers multiple neurodegenerative pathways in Alzheimer's disease models	REAC:R-HSA-8862803	0.022450871	1.648766811	21	35	1	61498	B4DJF2
REAC	BBSome-mediated cargo-targeting to cilium	REAC:R-HSA-5620922	0.024415898	1.612327302	23	35	1	61498	P50990
REAC	MAPK family signaling cascades	REAC:R-HSA-5683057	0.024874043	1.604253625	308	35	2	61498	C9JC84,P02671
REAC	Defective Intrinsic Pathway for Apoptosis	REAC:R-HSA-9734009	0.024983732	1.602342684	24	35	1	61498	B4DJF2
REAC	Sema4D in semaphorin signaling	REAC:R-HSA-400685	0.024983732	1.602342684	24	35	1	61498	B7Z6Z4
REAC	RHO GTPase Effectors	REAC:R-HSA-195258	0.026077029	1.583741896	319	35	2	61498	B7Z6Z4,B4DJF2
REAC	Formation of tubulin folding intermediates by CCT/TriC	REAC:R-HSA-389960	0.026215876	1.581435624	26	35	1	61498	P50990
REAC	A tetrasaccharide linker sequence is required for GAG synthesis	REAC:R-HSA-1971475	0.026215876	1.581435624	26	35	1	61498	P21810
REAC	Syndecan interactions	REAC:R-HSA-3000170	0.026215876	1.581435624	26	35	1	61498	E9PC84
REAC	Calnexin/calreticulin cycle	REAC:R-HSA-901042	0.026215876	1.581435624	26	35	1	61498	K7ELL7
REAC	EPHA-mediated growth cone collapse	REAC:R-HSA-3928663	0.027536982	1.560083658	28	35	1	61498	B7Z6Z4
REAC	Keratan sulfate biosynthesis	REAC:R-HSA-2022854	0.027536982	1.560083658	28	35	1	61498	P51884
REAC	EGR2 and SOX10-mediated initiation of Schwann cell myelination	REAC:R-HSA-9619665	0.027536982	1.560083658	28	35	1	61498	P11047
REAC	Prefoldin mediated transfer of substrate to CCT/TriC	REAC:R-HSA-389957	0.027536982	1.560083658	28	35	1	61498	P50990
REAC	Translation of Structural Proteins	REAC:R-HSA-9683701	0.028173144	1.550164693	29	35	1	61498	K7ELL7
REAC	Maturation of spike protein	REAC:R-HSA-9694548	0.028173144	1.550164693	29	35	1	61498	K7ELL7
REAC	FOXO-mediated transcription of oxidative stress, metabolic and neuronal genes	REAC:R-HSA-9615017	0.028294495	1.548298055	30	35	1	61498	P04040
REAC	TNFR1-induced NFkappaB signaling pathway	REAC:R-HSA-5357956	0.028294495	1.548298055	30	35	1	61498	D6R909
REAC	Activation of BH3-only proteins	REAC:R-HSA-114452	0.028294495	1.548298055	30	35	1	61498	B4DJF2
REAC	MET activates PTK2 signaling	REAC:R-HSA-8874081	0.028294495	1.548298055	30	35	1	61498	P11047
REAC	Laminin interactions	REAC:R-HSA-3000157	0.028294495	1.548298055	30	35	1	61498	P11047
REAC	Cristae formation	REAC:R-HSA-8949613	0.029061595	1.536680549	31	35	1	61498	K7EJP1
REAC	Gluconeogenesis	REAC:R-HSA-70263	0.029819418	1.525500843	32	35	1	61498	P60174
REAC	Regulation of TNFR1 signaling	REAC:R-HSA-5357905	0.030395419	1.517191867	33	35	1	61498	D6R909
REAC	Cooperation of Prefoldin and TriC/CCT in actin and tubulin folding	REAC:R-HSA-389958	0.030395419	1.517191867	33	35	1	61498	P50990
REAC	Keratan sulfate/keratin metabolism	REAC:R-HSA-1638074	0.031131971	1.506793385	34	35	1	61498	P51884
REAC	Detoxification of Reactive Oxygen Species	REAC:R-HSA-3299685	0.031507752	1.501582579	35	35	1	61498	P04040
REAC	N-glycan trimming in the ER and Calnexin/Calreticulin cycle	REAC:R-HSA-532668	0.031507752	1.501582579	35	35	1	61498	K7ELL7
REAC	Class I MHC mediated antigen processing & presentation	REAC:R-HSA-983169	0.031507752	1.501582579	377	35	2	61498	C9JC84,P02671
REAC	Striated Muscle Contraction	REAC:R-HSA-390522	0.032221023	1.491860674	36	35	1	61498	A0A2R8Y5V9
REAC	RHOV GTPase cycle	REAC:R-HSA-9013424	0.032747065	1.484827615	37	35	1	61498	A0A2R8Y5V9
REAC	Apoptotic cleavage of cellular proteins	REAC:R-HSA-111465	0.032747065	1.484827615	37	35	1	61498	A0A0A0MS51
REAC	Cooperation of PDCL (PhLP1) and TRiC/CCT in G-protein beta folding	REAC:R-HSA-6814122	0.033083447	1.480389246	38	35	1	61498	P50990
REAC	Gene and protein expression by JAK-STAT signaling after Interleukin-12 stimulation	REAC:R-HSA-8950505	0.033083447	1.480389246	38	35	1	61498	P26038
REAC	Association of TriC/CCT with target proteins during biosynthesis	REAC:R-HSA-390471	0.033083447	1.480389246	38	35	1	61498	P50990
REAC	MET promotes cell motility	REAC:R-HSA-8875878	0.034620353	1.460668503	40	35	1	61498	P11047
REAC	TNF signaling	REAC:R-HSA-75893	0.035948906	1.444314326	42	35	1	61498	D6R909
REAC	NCAM1 interactions	REAC:R-HSA-419037	0.035948906	1.444314326	42	35	1	61498	C9JNG9
REAC	SUMOylation of RNA binding proteins	REAC:R-HSA-4570464	0.036602049	1.436494597	43	35	1	61498	P61978
REAC	Retinoid metabolism and transport	REAC:R-HSA-975634	0.037247926	1.428897899	44	35	1	61498	Q07954
REAC	Interleukin-12 signaling	REAC:R-HSA-9020591	0.039548706	1.402867721	47	35	1	61498	P26038
REAC	Metabolism of fat-soluble vitamins	REAC:R-HSA-6806667	0.0399649	1.398321265	48	35	1	61498	Q07954
REAC	Recycling pathway of L1	REAC:R-HSA-437239	0.0399649	1.398321265	48	35	1	61498	P26038
REAC	Translation of Structural Proteins	REAC:R-HSA-9694635	0.040372194	1.393917649	49	35	1	61498	K7ELL7
REAC	Chondroitin sulfate/dermatan sulfate metabolism	REAC:R-HSA-1793185	0.040372194	1.393917649	49	35	1	61498	P21810
REAC	SARS-CoV-1 Infection	REAC:R-HSA-9678108	0.040976769	1.387462291	50	35	1	61498	K7ELL7
REAC	Cargo trafficking to the periciliary membrane	REAC:R-HSA-5620920	0.041366948	1.383346517	51	35	1	61498	P50990
REAC	Apoptotic execution phase	REAC:R-HSA-75153	0.041366948	1.383346517	51	35	1	61498	A0A0A0MS51
REAC	Intrinsic Pathway for Apoptosis	REAC:R-HSA-109606	0.043330827	1.363203025	54	35	1	61498	B4DJF2
REAC	Signaling by PDGF	REAC:R-HSA-186797	0.043330827	1.363203025	54	35	1	61498	C9JNG9
REAC	Heparan sulfate/heparin (HS-GAG) metabolism	REAC:R-HSA-1638091	0.043903757	1.357498316	55	35	1	61498	P21810
REAC	Interleukin-12 family signaling	REAC:R-HSA-447115	0.045252299	1.344359356	57	35	1	61498	P26038
REAC	Signaling by Receptor Tyrosine Kinases	REAC:R-HSA-9006934	0.046261739	1.334778049	502	35	2	61498	P11047,C9JNG9
REAC	rRNA modification in the nucleus and cytosol	REAC:R-HSA-6790901	0.046261739	1.334778049	59	35	1	61498	E9PM36
REAC	NCAM signaling for neurite out-growth	REAC:R-HSA-375165	0.046261739	1.334778049	59	35	1	61498	C9JNG9
REAC	Peroxisomal protein import	REAC:R-HSA-9033241	0.046679407	1.33087467	60	35	1	61498	P04040
REAC	Semaphorin interactions	REAC:R-HSA-373755	0.049498631	1.305406816	64	35	1	61498	B7Z6Z4
REAC	Mitochondrial protein import	REAC:R-HSA-1268020	0.050018896	1.300865897	65	35	1	61498	K7EJP1
REAC	Sensory processing of sound by inner hair cells of the cochlea	REAC:R-HSA-9662360	0.050295447	1.29847133	66	35	1	61498	P26038
REAC	FOXO-mediated transcription	REAC:R-HSA-9614085	0.050295447	1.29847133	66	35	1	61498	P04040
REAC	Glycolysis	REAC:R-HSA-70171	0.050566418	1.29613781	67	35	1	61498	P60174
REAC	Regulation of HSF1-mediated heat shock response	REAC:R-HSA-3371453	0.050566418	1.29613781	67	35	1	61498	B4DJF2
REAC	Loss of Nlp from mitotic centrosomes	REAC:R-HSA-380259	0.050831965	1.293863104	68	35	1	61498	B4DJF2
REAC	Loss of proteins required for interphase microtubule organization from the centrosome	REAC:R-HSA-380284	0.050831965	1.293863104	68	35	1	61498	B4DJF2
REAC	Scavenging of heme from plasma	REAC:R-HSA-2168880	0.051327685	1.289648324	69	35	1	61498	Q07954
REAC	ISG15 antiviral mechanism	REAC:R-HSA-1169408	0.051818455	1.285515541	70	35	1	61498	E7EN95
REAC	AURKA Activation by TPX2	REAC:R-HSA-8854518	0.052066596	1.283440815	71	35	1	61498	B4DJF2
REAC	SARS-CoV-2 Infection	REAC:R-HSA-9694516	0.052066596	1.283440815	71	35	1	61498	K7ELL7
REAC	Translocation of SLC2A4 (GLUT4) to the plasma membrane	REAC:R-HSA-1445148	0.052546568	1.279455647	72	35	1	61498	B4DJF2
REAC	Initial triggering of complement	REAC:R-HSA-166663	0.054662848	1.262307744	76	35	1	61498	A0A0G2JL54
REAC	Signaling by MET	REAC:R-HSA-6806834	0.054662848	1.262307744	76	35	1	61498	P11047
REAC	Cell death signalling via NRAGE, NRIF and NADE	REAC:R-HSA-204998	0.054662848	1.262307744	76	35	1	61498	B4DJF2
REAC	Antiviral mechanism by IFN-stimulated genes	REAC:R-HSA-1169410	0.05582132	1.253199898	78	35	1	61498	E7EN95
REAC	RMTs methylate histone arginines	REAC:R-HSA-3214858	0.056271352	1.249712648	79	35	1	61498	E9PM36
REAC	Centrosome maturation	REAC:R-HSA-380287	0.056468276	1.248195468	80	35	1	61498	B4DJF2
REAC	Recruitment of mitotic centrosome proteins and complexes	REAC:R-HSA-380270	0.056468276	1.248195468	80	35	1	61498	B4DJF2
REAC	Signaling by NOTCH4	REAC:R-HSA-9013694	0.056908826	1.24482037	81	35	1	61498	P62736
REAC	TP53 Regulates Metabolic Genes	REAC:R-HSA-5628897	0.058711572	1.231276292	84	35	1	61498	B4DJF2
REAC	Regulation of PLK1 Activity at G2/M Transition	REAC:R-HSA-2565942	0.058882188	1.23001606	85	35	1	61498	B4DJF2
REAC	Glucose metabolism	REAC:R-HSA-70326	0.058882188	1.23001606	85	35	1	61498	P60174
REAC	Cellular response to heat stress	REAC:R-HSA-3371556	0.059976048	1.222022158	87	35	1	61498	B4DJF2
REAC	RAB GEFs exchange GTP for GDP on RABs	REAC:R-HSA-8876198	0.060389592	1.219037905	88	35	1	61498	B4DJF2
REAC	EPH-Ephrin signaling	REAC:R-HSA-2682334	0.061465511	1.211368502	90	35	1	61498	B7Z6Z4
REAC	Chaperonin-mediated protein folding	REAC:R-HSA-390466	0.061868137	1.20853296	91	35	1	61498	P50990
REAC	Mitochondrial biogenesis	REAC:R-HSA-1592230	0.062267	1.205742058	92	35	1	61498	K7EJP1
REAC	Recruitment of NuMA to mitotic centrosomes	REAC:R-HSA-380320	0.063318557	1.198468994	94	35	1	61498	B4DJF2
REAC	Visual phototransduction	REAC:R-HSA-2187338	0.063680221	1.195995436	97	35	1	61498	Q07954
REAC	p75 NTR receptor-mediated signalling	REAC:R-HSA-193704	0.063680221	1.195995436	97	35	1	61498	B4DJF2
REAC	SLC transporter disorders	REAC:R-HSA-5619102	0.063680221	1.195995436	96	35	1	61498	P02730
REAC	Anchoring of the basal body to the plasma membrane	REAC:R-HSA-5620912	0.063680221	1.195995436	96	35	1	61498	B4DJF2
REAC	G2/M DNA damage checkpoint	REAC:R-HSA-69473	0.063680221	1.195995436	95	35	1	61498	B4DJF2
REAC	Binding and Uptake of Ligands by Scavenger Receptors	REAC:R-HSA-2173782	0.063680221	1.195995436	97	35	1	61498	Q07954
REAC	Protein folding	REAC:R-HSA-391251	0.064056546	1.193436484	98	35	1	61498	P50990
REAC	Regulation of Complement cascade	REAC:R-HSA-977606	0.065487125	1.183844078	101	35	1	61498	A0A0G2JL54
REAC	Hemostasis	REAC:R-HSA-109582	0.065487125	1.183844078	672	35	2	61498	C9JC84,P02671
REAC	Diseases of programmed cell death	REAC:R-HSA-9645723	0.065792379	1.181824412	102	35	1	61498	B4DJF2
REAC	Transport of inorganic cations/anions and amino acids/oligopeptides	REAC:R-HSA-425393	0.06739999	1.171340168	105	35	1	61498	P02730
REAC	Cytokine Signaling in Immune system	REAC:R-HSA-1280215	0.070400526	1.152424097	705	35	2	61498	P26038,E7EN95
REAC	Complement cascade	REAC:R-HSA-166658	0.070567538	1.151395033	111	35	1	61498	A0A0G2JL54
REAC	HCMV Late Events	REAC:R-HSA-9610379	0.071514752	1.145604366	113	35	1	61498	P61978
REAC	Vesicle-mediated transport	REAC:R-HSA-5653656	0.0718301	1.143693531	718	35	2	61498	Q07954,B4DJF2
REAC	Rab regulation of trafficking	REAC:R-HSA-9007101	0.075202564	1.123767353	120	35	1	61498	B4DJF2
REAC	Respiratory electron transport, ATP synthesis by chemiosmotic coupling, and heat production by uncoupling proteins.	REAC:R-HSA-163200	0.079125511	1.101683475	127	35	1	61498	K7EJP1
REAC	Adaptive Immune System	REAC:R-HSA-1280218	0.086767919	1.061640816	806	35	2	61498	C9JC84,P02671
REAC	SARS-CoV Infections	REAC:R-HSA-9679506	0.090967879	1.041111932	148	35	1	61498	K7ELL7
REAC	Cellular response to chemical stress	REAC:R-HSA-9711123	0.095889732	1.018227896	157	35	1	61498	P04040
REAC	HCMV Infection	REAC:R-HSA-9609646	0.096683518	1.014647556	159	35	1	61498	P61978
REAC	G2/M Checkpoints	REAC:R-HSA-69481	0.101513704	0.993475326	168	35	1	61498	B4DJF2
REAC	SUMO E3 ligases SUMOylate target proteins	REAC:R-HSA-3108232	0.102272836	0.990239703	170	35	1	61498	P61978
REAC	Disorders of transmembrane transporters	REAC:R-HSA-5619115	0.104166062	0.982273756	174	35	1	61498	P02730
REAC	SUMOylation	REAC:R-HSA-2990846	0.104905551	0.979201533	176	35	1	61498	P61978
REAC	The citric acid (TCA) cycle and respiratory electron transport	REAC:R-HSA-1428517	0.105073339	0.978507467	177	35	1	61498	K7EJP1
REAC	mRNA Splicing - Major Pathway	REAC:R-HSA-72163	0.105239549	0.977821023	178	35	1	61498	P61978
REAC	Metabolism of vitamins and cofactors	REAC:R-HSA-196854	0.108908086	0.962939872	186	35	1	61498	Q07954
REAC	mRNA Splicing	REAC:R-HSA-72172	0.108908086	0.962939872	186	35	1	61498	P61978
REAC	Interferon Signaling	REAC:R-HSA-913531	0.112370774	0.949346626	193	35	1	61498	E7EN95
REAC	G2/M Transition	REAC:R-HSA-69275	0.113051629	0.946723174	195	35	1	61498	B4DJF2
REAC	Mitotic G2-G2/M phases	REAC:R-HSA-453274	0.113726227	0.944139369	197	35	1	61498	B4DJF2
REAC	Mitotic Prometaphase	REAC:R-HSA-68877	0.114394638	0.941594331	199	35	1	61498	B4DJF2
REAC	Signaling by NOTCH	REAC:R-HSA-157118	0.132220283	0.878701917	233	35	1	61498	P62736
REAC	Processing of Capped Intron-Containing Pre-mRNA	REAC:R-HSA-72203	0.133852243	0.873374345	237	35	1	61498	P61978
REAC	SLC-mediated transmembrane transport	REAC:R-HSA-425407	0.139138185	0.856553666	248	35	1	61498	P02730
REAC	Chromatin modifying enzymes	REAC:R-HSA-3247509	0.151029101	0.820939361	273	35	1	61498	E9PM36
REAC	Chromatin organization	REAC:R-HSA-4839726	0.151029101	0.820939361	273	35	1	61498	E9PM36
REAC	Cell Cycle Checkpoints	REAC:R-HSA-69620	0.158969604	0.798685908	290	35	1	61498	B4DJF2
REAC	Generic Transcription Pathway	REAC:R-HSA-212436	0.158969604	0.798685908	1221	35	2	61498	P04040,B4DJF2
REAC	Asparagine N-linked glycosylation	REAC:R-HSA-446203	0.165482057	0.78124909	305	35	1	61498	K7ELL7
REAC	RNA Polymerase II Transcription	REAC:R-HSA-73857	0.182965909	0.737629823	1342	35	2	61498	P04040,B4DJF2
REAC	Transcriptional Regulation by TP53	REAC:R-HSA-3700989	0.192043566	0.716600239	362	35	1	61498	B4DJF2
REAC	Gene expression (Transcription)	REAC:R-HSA-74160	0.21042664	0.67689928	1478	35	2	61498	P04040,B4DJF2
REAC	M Phase	REAC:R-HSA-68886	0.211822522	0.674027866	407	35	1	61498	B4DJF2
REAC	RHO GTPase cycle	REAC:R-HSA-9012999	0.230263906	0.637774133	449	35	1	61498	A0A2R8Y5V9
REAC	Signaling by Interleukins	REAC:R-HSA-449147	0.234390084	0.630060766	460	35	1	61498	P26038
REAC	Cell Cycle, Mitotic	REAC:R-HSA-69278	0.271838766	0.56568861	548	35	1	61498	B4DJF2
REAC	Membrane Trafficking	REAC:R-HSA-199991	0.302352591	0.519486305	624	35	1	61498	B4DJF2
REAC	Cell Cycle	REAC:R-HSA-1640170	0.322783861	0.491088188	678	35	1	61498	B4DJF2
REAC	Transport of small molecules	REAC:R-HSA-382551	0.337875516	0.471243278	720	35	1	61498	P02730
WP	VEGFA-VEGFR2 signaling pathway	WP:WP3888	0.000157655	3.802293023	415	35	5	61498	E7EN95,C9JC84,P02671,D6R909,B4DJF2
WP	COVID-19, thrombosis and anticoagulation	WP:WP4927	0.000184685	3.733567561	7	35	2	61498	C9JC84,P02671
WP	Folate metabolism	WP:WP176	0.000197356	3.704750185	71	35	3	61498	P04040,C9JC84,P02671
WP	Complement system	WP:WP2806	0.000268442	3.571149496	90	35	3	61498	P11047,C9JC84,P02671
WP	Selenium micronutrient network	WP:WP15	0.000268442	3.571149496	85	35	3	61498	P04040,C9JC84,P02671
WP	Amplification and expansion of oncogenic pathways as metastatic traits	WP:WP3678	0.00044692	3.349770151	17	35	2	61498	B1ALD9,E9PC84
WP	Burn wound healing	WP:WP5055	0.00044692	3.349770151	113	35	3	61498	E9PC84,P09382,E9PKH2
WP	Blood clotting cascade	WP:WP272	0.000673556	3.171626148	22	35	2	61498	C9JC84,P02671
WP	Angiotensin II receptor type 1 pathway	WP:WP5036	0.000989839	3.004435506	28	35	2	61498	P62736,D6R909
WP	Focal adhesion	WP:WP306	0.001295155	2.887678324	190	35	3	61498	P11047,E9PC84,E7EN95
WP	Striated muscle contraction pathway	WP:WP383	0.001295155	2.887678324	35	35	2	61498	A0A2R8Y5V9,P62736
WP	Network map of SARS-CoV-2 signaling pathway	WP:WP5115	0.001640688	2.784973888	215	35	3	61498	A0A0A0MS51,C9JC84,P02671
WP	miRNA targets in ECM and membrane receptors	WP:WP2911	0.00164206	2.784611035	43	35	2	61498	P11047,C9JNG9
WP	Fibrin complement receptor 3 signaling pathway	WP:WP4136	0.00164206	2.784611035	44	35	2	61498	C9JC84,P02671
WP	Cytoplasmic ribosomal proteins	WP:WP477	0.00366458	2.435975776	69	35	2	61498	J3KTE4,P63220
WP	16p11.2 proximal deletion syndrome	WP:WP4949	0.00366458	2.435975776	70	35	2	61498	P26038,P50990
WP	PI3K-Akt signaling pathway	WP:WP4172	0.004226144	2.374055666	333	35	3	61498	P11047,E9PC84,C9JNG9
WP	Ebola virus infection in host	WP:WP4217	0.010480406	1.979621894	126	35	2	61498	A0A0A0MS51,E7EN95
WP	Measles virus infection	WP:WP4630	0.011234135	1.949460356	134	35	2	61498	P26038,D6R909
WP	Regulation of actin cytoskeleton	WP:WP51	0.011985709	1.921336255	142	35	2	61498	A0A0A0MS51,P26038
WP	Myometrial relaxation and contraction pathways	WP:WP289	0.01273483	1.895006857	150	35	2	61498	P62736,B4DJF2
WP	Sudden infant death syndrome (SIDS) susceptibility pathways	WP:WP706	0.012986429	1.886510256	155	35	2	61498	A0A0G2JL54,B4DJF2
WP	HIF1A and PPARG regulation of glycolysis	WP:WP2456	0.015268488	1.816203978	8	35	1	61498	P60174
WP	Glial cell differentiation	WP:WP2276	0.015268488	1.816203978	8	35	1	61498	P26038
WP	PtdIns(4,5)P2 in cytokinesis pathway	WP:WP5199	0.020169977	1.695294598	11	35	1	61498	P26038
WP	Aerobic glycolysis	WP:WP4629	0.02118281	1.674016427	12	35	1	61498	P60174
WP	Disorders of fructose metabolism	WP:WP5178	0.02212236	1.655168552	13	35	1	61498	P60174
WP	Familial hyperlipidemia type 3	WP:WP5110	0.022996207	1.638343789	14	35	1	61498	Q07954
WP	Familial hyperlipidemia type 5	WP:WP5112	0.023810923	1.623223767	15	35	1	61498	Q07954
WP	15q13.3 copy number variation syndrome	WP:WP4942	0.024470955	1.611349085	16	35	1	61498	E9PKH2
WP	Familial hyperlipidemia type 1	WP:WP5108	0.024470955	1.611349085	18	35	1	61498	Q07954
WP	TGF-beta signaling in thyroid cells for epithelial-mesenchymal transition	WP:WP3859	0.024470955	1.611349085	18	35	1	61498	E9PC84
WP	Regulation of Wnt / B-catenin signaling by small molecule compounds	WP:WP3664	0.024470955	1.611349085	18	35	1	61498	Q07954
WP	Cori cycle	WP:WP1946	0.024470955	1.611349085	17	35	1	61498	P60174
WP	Focal adhesion: PI3K-Akt-mTOR-signaling pathway	WP:WP3932	0.02751731	1.560394024	295	35	2	61498	P11047,E9PC84
WP	Familial hyperlipidemia type 4	WP:WP5111	0.02751731	1.560394024	22	35	1	61498	Q07954
WP	Complement activation	WP:WP545	0.02751731	1.560394024	21	35	1	61498	A0A0G2JL54
WP	Hypothesized pathways in pathogenesis of cardiovascular disease	WP:WP3668	0.030442669	1.516517275	25	35	1	61498	B1ALD9
WP	Alpha 6 beta 4 signaling pathway	WP:WP244	0.033994215	1.468594989	33	35	1	61498	P11047
WP	Fatty acid beta-oxidation	WP:WP143	0.033994215	1.468594989	33	35	1	61498	P60174
WP	Oxidative stress response	WP:WP408	0.033994215	1.468594989	33	35	1	61498	P04040
WP	Type I collagen synthesis in the context of osteogenesis imperfecta	WP:WP4786	0.033994215	1.468594989	31	35	1	61498	E9PKH2
WP	Regucalcin in proximal tubule epithelial kidney cells	WP:WP4838	0.033994215	1.468594989	33	35	1	61498	P62736
WP	Inflammatory response pathway	WP:WP453	0.033994215	1.468594989	31	35	1	61498	P11047
WP	Statin inhibition of cholesterol production	WP:WP430	0.033994215	1.468594989	33	35	1	61498	Q07954
WP	Amyotrophic lateral sclerosis (ALS)	WP:WP2447	0.037262655	1.428726207	37	35	1	61498	P04040
WP	Oxidative damage response	WP:WP3941	0.039412098	1.404370448	40	35	1	61498	A0A0G2JL54
WP	Tryptophan metabolism	WP:WP465	0.04051582	1.392375362	42	35	1	61498	P04040
WP	Glycolysis and gluconeogenesis	WP:WP534	0.041573326	1.381185231	44	35	1	61498	P60174
WP	Malignant pleural mesothelioma	WP:WP5087	0.041589855	1.381012596	433	35	2	61498	P11047,P62736
WP	Mechanoregulation and pathology of YAP/TAZ via Hippo and non-Hippo mechanisms	WP:WP4534	0.042664601	1.369932312	47	35	1	61498	P62736
WP	Apoptosis-related network due to altered Notch3 in ovarian cancer	WP:WP2864	0.045392567	1.343015252	52	35	1	61498	Q8NC51
WP	CCL18 signaling pathway	WP:WP5097	0.045392567	1.343015252	52	35	1	61498	P62736
WP	Interferon type I signaling pathways	WP:WP585	0.046255896	1.334832901	54	35	1	61498	D6R909
WP	Oxidative phosphorylation	WP:WP623	0.046258457	1.334808862	55	35	1	61498	K7EJP1
WP	Complement and coagulation cascades	WP:WP558	0.046260477	1.334789896	56	35	1	61498	A0A0G2JL54
WP	AGE/RAGE pathway	WP:WP2324	0.050884275	1.293416409	65	35	1	61498	P26038
WP	Endochondral ossification	WP:WP474	0.050884275	1.293416409	64	35	1	61498	E9PKH2
WP	Endochondral ossification with skeletal dysplasias	WP:WP4808	0.050884275	1.293416409	64	35	1	61498	E9PKH2
WP	Androgen receptor signaling pathway	WP:WP138	0.064472522	1.190625343	87	35	1	61498	D6R909
WP	Allograft rejection	WP:WP2328	0.064472522	1.190625343	86	35	1	61498	A0A0G2JL54
WP	Clear cell renal cell carcinoma pathways	WP:WP4018	0.064472522	1.190625343	85	35	1	61498	P60174
WP	Electron transport chain: OXPHOS system in mitochondria	WP:WP111	0.067020514	1.173792243	92	35	1	61498	K7EJP1
WP	Small cell lung cancer	WP:WP4658	0.068085188	1.166947359	95	35	1	61498	P11047
WP	lncRNA in canonical Wnt signaling and colorectal cancer	WP:WP4258	0.069114172	1.160432892	98	35	1	61498	P61978
WP	Complement system in neuronal development and plasticity	WP:WP5090	0.069742868	1.1565002	101	35	1	61498	A0A0G2JL54
WP	7q11.23 copy number variation syndrome	WP:WP4932	0.069742868	1.1565002	102	35	1	61498	K7EJP1
WP	DNA damage response (only ATM dependent)	WP:WP710	0.073960485	1.131000249	110	35	1	61498	P04040
WP	mRNA processing	WP:WP411	0.0754722	1.122212988	114	35	1	61498	P61978
WP	Cell cycle	WP:WP179	0.075673169	1.121058078	116	35	1	61498	B4DJF2
WP	22q11.2 copy number variation syndrome	WP:WP4657	0.077110818	1.11288469	120	35	1	61498	P62736
WP	TGF-beta signaling pathway	WP:WP366	0.081557445	1.088536386	129	35	1	61498	E9PC84
WP	Endoderm differentiation	WP:WP2853	0.082859341	1.081658524	133	35	1	61498	P11047
WP	Male infertility	WP:WP4673	0.084899274	1.071096026	145	35	1	61498	P04040
WP	2q37 copy number variation syndrome	WP:WP5224	0.084899274	1.071096026	141	35	1	61498	C9JNG9
WP	Brain-derived neurotrophic factor (BDNF) signaling pathway	WP:WP2380	0.084899274	1.071096026	140	35	1	61498	D6R909
WP	Orexin receptor pathway	WP:WP5094	0.084899274	1.071096026	146	35	1	61498	E9PC84
WP	Calcium regulation in cardiac cells	WP:WP536	0.084899274	1.071096026	145	35	1	61498	B4DJF2
WP	Ciliary landscape	WP:WP4352	0.111025786	0.954576146	196	35	1	61498	B7Z6Z4
WP	MAPK signaling pathway	WP:WP382	0.133193328	0.87551753	241	35	1	61498	E7EN95
WP	Alzheimer's disease	WP:WP5124	0.136149966	0.865982463	250	35	1	61498	Q07954
WP	IL-18 signaling pathway	WP:WP4754	0.145477804	0.837203264	272	35	1	61498	P62736
WP	Alzheimer's disease and miRNA effects	WP:WP2059	0.16646	0.77869011	319	35	1	61498	Q07954
