# Supplementary material for: Comparative Shotgun Proteomics Reveals the Characteristic Protein Signature of Osteosarcoma Subtypes
Source: Cells. 2023 Aug 30;12(17):2179. doi: 10.3390/cells12172179 (PMC10487120; doi:10.3390/cells12172179)
Supplement: Supplementary file 1 [file cells-12-02179-s001.zip › Table S6-GO analysis for DEPs between pathological subtypes.xlsx]

## Sheet: GO enrichment_Fibroblastic
GO	#term ID	term description	observed gene count	background gene count	strength	false discovery rate	matching proteins in your network (IDs)	matching proteins in your network (labels)
MF	GO:0003723	RNA binding	14	1649	0.99	1.66e-09	9606.ENSP00000215909,9606.ENSP00000225430,9606.ENSP00000243077,9606.ENSP00000248553,9606.ENSP00000264335,9606.ENSP00000337838,9606.ENSP00000345957,9606.ENSP00000360034,9606.ENSP00000365439,9606.ENSP00000366694,9606.ENSP00000381736,9606.ENSP00000418868,9606.ENSP00000420213,9606.ENSP00000426909	LGALS1,RPL19,LRP1,HSPB1,YWHAE,RTN4,RPS21,SERBP1,HNRNPK,KCTD12,ATP5A1,RPL29,FLNB,GNB2L1
MF	GO:0045296	Cadherin binding	8	334	1.44	2.74e-07	9606.ENSP00000264335,9606.ENSP00000286788,9606.ENSP00000337838,9606.ENSP00000360034,9606.ENSP00000365439,9606.ENSP00000418868,9606.ENSP00000420213,9606.ENSP00000426909	YWHAE,CCT8,RTN4,SERBP1,HNRNPK,RPL29,FLNB,GNB2L1
MF	GO:0050839	Cell adhesion molecule binding	9	538	1.28	2.74e-07	9606.ENSP00000264335,9606.ENSP00000286788,9606.ENSP00000337838,9606.ENSP00000360034,9606.ENSP00000365439,9606.ENSP00000369071,9606.ENSP00000418868,9606.ENSP00000420213,9606.ENSP00000426909	YWHAE,CCT8,RTN4,SERBP1,HNRNPK,POSTN,RPL29,FLNB,GNB2L1
MF	GO:0005515	Protein binding	16	7026	0.42	0.00056	9606.ENSP00000215909,9606.ENSP00000243077,9606.ENSP00000248553,9606.ENSP00000264335,9606.ENSP00000286788,9606.ENSP00000337838,9606.ENSP00000345230,9606.ENSP00000345957,9606.ENSP00000360034,9606.ENSP00000365439,9606.ENSP00000366694,9606.ENSP00000369071,9606.ENSP00000381736,9606.ENSP00000418868,9606.ENSP00000420213,9606.ENSP00000426909	LGALS1,LRP1,HSPB1,YWHAE,CCT8,RTN4,TPM4,RPS21,SERBP1,HNRNPK,KCTD12,POSTN,ATP5A1,RPL29,FLNB,GNB2L1
MF	GO:0097159	Organic cyclic compound binding	15	5916	0.47	0.00056	9606.ENSP00000215909,9606.ENSP00000225430,9606.ENSP00000243077,9606.ENSP00000248553,9606.ENSP00000264335,9606.ENSP00000286788,9606.ENSP00000337838,9606.ENSP00000345957,9606.ENSP00000360034,9606.ENSP00000365439,9606.ENSP00000366694,9606.ENSP00000381736,9606.ENSP00000418868,9606.ENSP00000420213,9606.ENSP00000426909	LGALS1,RPL19,LRP1,HSPB1,YWHAE,CCT8,RTN4,RPS21,SERBP1,HNRNPK,KCTD12,ATP5A1,RPL29,FLNB,GNB2L1
MF	GO:1901363	Heterocyclic compound binding	15	5831	0.47	0.00056	9606.ENSP00000215909,9606.ENSP00000225430,9606.ENSP00000243077,9606.ENSP00000248553,9606.ENSP00000264335,9606.ENSP00000286788,9606.ENSP00000337838,9606.ENSP00000345957,9606.ENSP00000360034,9606.ENSP00000365439,9606.ENSP00000366694,9606.ENSP00000381736,9606.ENSP00000418868,9606.ENSP00000420213,9606.ENSP00000426909	LGALS1,RPL19,LRP1,HSPB1,YWHAE,CCT8,RTN4,RPS21,SERBP1,HNRNPK,KCTD12,ATP5A1,RPL29,FLNB,GNB2L1
MF	GO:0042802	Identical protein binding	9	1896	0.74	0.0036	9606.ENSP00000215909,9606.ENSP00000248553,9606.ENSP00000264335,9606.ENSP00000337838,9606.ENSP00000345230,9606.ENSP00000365439,9606.ENSP00000366694,9606.ENSP00000420213,9606.ENSP00000426909	LGALS1,HSPB1,YWHAE,RTN4,TPM4,HNRNPK,KCTD12,FLNB,GNB2L1
CC	GO:0005925	Focal adhesion	7	405	1.3	4.78e-05	9606.ENSP00000225430,9606.ENSP00000243077,9606.ENSP00000248553,9606.ENSP00000264335,9606.ENSP00000345230,9606.ENSP00000365439,9606.ENSP00000420213	RPL19,LRP1,HSPB1,YWHAE,TPM4,HNRNPK,FLNB
CC	GO:0030054	Cell junction	11	2075	0.79	7.44e-05	9606.ENSP00000225430,9606.ENSP00000243077,9606.ENSP00000248553,9606.ENSP00000264335,9606.ENSP00000337838,9606.ENSP00000345230,9606.ENSP00000345957,9606.ENSP00000365439,9606.ENSP00000366694,9606.ENSP00000369071,9606.ENSP00000420213	RPL19,LRP1,HSPB1,YWHAE,RTN4,TPM4,RPS21,HNRNPK,KCTD12,POSTN,FLNB
CC	GO:0022626	Cytosolic ribosome	4	97	1.68	0.00064	9606.ENSP00000225430,9606.ENSP00000345957,9606.ENSP00000418868,9606.ENSP00000426909	RPL19,RPS21,RPL29,GNB2L1
CC	GO:0070062	Extracellular exosome	10	2099	0.74	0.00066	9606.ENSP00000215909,9606.ENSP00000248553,9606.ENSP00000264335,9606.ENSP00000286788,9606.ENSP00000345230,9606.ENSP00000360034,9606.ENSP00000365439,9606.ENSP00000381736,9606.ENSP00000420213,9606.ENSP00000426909	LGALS1,HSPB1,YWHAE,CCT8,TPM4,SERBP1,HNRNPK,ATP5A1,FLNB,GNB2L1
CC	GO:0005615	Extracellular space	11	3195	0.6	0.002	9606.ENSP00000215909,9606.ENSP00000248553,9606.ENSP00000264335,9606.ENSP00000286788,9606.ENSP00000345230,9606.ENSP00000360034,9606.ENSP00000365439,9606.ENSP00000369071,9606.ENSP00000381736,9606.ENSP00000420213,9606.ENSP00000426909	LGALS1,HSPB1,YWHAE,CCT8,TPM4,SERBP1,HNRNPK,POSTN,ATP5A1,FLNB,GNB2L1
CC	GO:0044391	Ribosomal subunit	4	178	1.41	0.0027	9606.ENSP00000225430,9606.ENSP00000345957,9606.ENSP00000418868,9606.ENSP00000426909	RPL19,RPS21,RPL29,GNB2L1
CC	GO:0042995	Cell projection	9	2287	0.66	0.0059	9606.ENSP00000243077,9606.ENSP00000248553,9606.ENSP00000264335,9606.ENSP00000286788,9606.ENSP00000337838,9606.ENSP00000365439,9606.ENSP00000366694,9606.ENSP00000420213,9606.ENSP00000426909	LRP1,HSPB1,YWHAE,CCT8,RTN4,HNRNPK,KCTD12,FLNB,GNB2L1
CC	GO:0031982	Vesicle	11	3879	0.51	0.0092	9606.ENSP00000215909,9606.ENSP00000243077,9606.ENSP00000248553,9606.ENSP00000264335,9606.ENSP00000286788,9606.ENSP00000345230,9606.ENSP00000360034,9606.ENSP00000365439,9606.ENSP00000381736,9606.ENSP00000420213,9606.ENSP00000426909	LGALS1,LRP1,HSPB1,YWHAE,CCT8,TPM4,SERBP1,HNRNPK,ATP5A1,FLNB,GNB2L1
CC	GO:0045202	Synapse	7	1351	0.78	0.0097	9606.ENSP00000225430,9606.ENSP00000243077,9606.ENSP00000264335,9606.ENSP00000337838,9606.ENSP00000345957,9606.ENSP00000366694,9606.ENSP00000369071	RPL19,LRP1,YWHAE,RTN4,RPS21,KCTD12,POSTN
CC	GO:0044297	Cell body	5	588	0.99	0.013	9606.ENSP00000243077,9606.ENSP00000286788,9606.ENSP00000337838,9606.ENSP00000420213,9606.ENSP00000426909	LRP1,CCT8,RTN4,FLNB,GNB2L1
CC	GO:0032991	Protein-containing complex	12	5073	0.43	0.0148	9606.ENSP00000225430,9606.ENSP00000243077,9606.ENSP00000248553,9606.ENSP00000264335,9606.ENSP00000286788,9606.ENSP00000345230,9606.ENSP00000345957,9606.ENSP00000365439,9606.ENSP00000366694,9606.ENSP00000381736,9606.ENSP00000418868,9606.ENSP00000426909	RPL19,LRP1,HSPB1,YWHAE,CCT8,TPM4,RPS21,HNRNPK,KCTD12,ATP5A1,RPL29,GNB2L1
CC	GO:1990904	Ribonucleoprotein complex	5	677	0.93	0.0208	9606.ENSP00000225430,9606.ENSP00000345957,9606.ENSP00000365439,9606.ENSP00000418868,9606.ENSP00000426909	RPL19,RPS21,HNRNPK,RPL29,GNB2L1
CC	GO:0042788	Polysomal ribosome	2	32	1.86	0.035	9606.ENSP00000225430,9606.ENSP00000345957	RPL19,RPS21
CC	GO:0022627	Cytosolic small ribosomal subunit	2	39	1.77	0.0484	9606.ENSP00000345957,9606.ENSP00000426909	RPS21,GNB2L1
CC	GO:0043232	Intracellular non-membrane-bounded organelle	11	4880	0.41	0.0498	9606.ENSP00000225430,9606.ENSP00000243077,9606.ENSP00000248553,9606.ENSP00000264335,9606.ENSP00000286788,9606.ENSP00000345230,9606.ENSP00000345957,9606.ENSP00000365439,9606.ENSP00000418868,9606.ENSP00000420213,9606.ENSP00000426909	RPL19,LRP1,HSPB1,YWHAE,CCT8,TPM4,RPS21,HNRNPK,RPL29,FLNB,GNB2L1
BP	GO:0016032	Viral process	7	776	1.02	0.028	9606.ENSP00000225430,9606.ENSP00000248553,9606.ENSP00000264335,9606.ENSP00000345957,9606.ENSP00000365439,9606.ENSP00000418868,9606.ENSP00000426909	RPL19,HSPB1,YWHAE,RPS21,HNRNPK,RPL29,GNB2L1
BP	GO:0030335	Positive regulation of cell migration	6	522	1.12	0.028	9606.ENSP00000243077,9606.ENSP00000248553,9606.ENSP00000337838,9606.ENSP00000369071,9606.ENSP00000381736,9606.ENSP00000426909	LRP1,HSPB1,RTN4,POSTN,ATP5A1,GNB2L1
BP	GO:1903829	Positive regulation of cellular protein localization	5	342	1.23	0.028	9606.ENSP00000243077,9606.ENSP00000264335,9606.ENSP00000286788,9606.ENSP00000337838,9606.ENSP00000426909	LRP1,YWHAE,CCT8,RTN4,GNB2L1
BP	GO:0010812	Negative regulation of cell-substrate adhesion	3	62	1.75	0.032	9606.ENSP00000215909,9606.ENSP00000243077,9606.ENSP00000369071	LGALS1,LRP1,POSTN
BP	GO:0042981	Regulation of apoptotic process	8	1550	0.77	0.032	9606.ENSP00000215909,9606.ENSP00000243077,9606.ENSP00000248553,9606.ENSP00000264335,9606.ENSP00000337838,9606.ENSP00000360034,9606.ENSP00000365439,9606.ENSP00000426909	LGALS1,LRP1,HSPB1,YWHAE,RTN4,SERBP1,HNRNPK,GNB2L1
BP	GO:0002181	Cytoplasmic translation	3	72	1.68	0.0412	9606.ENSP00000225430,9606.ENSP00000345957,9606.ENSP00000418868	RPL19,RPS21,RPL29

## Sheet: GO enrichment_Chondroblastic
	#term ID	term description	observed gene count	background gene count	strength	false discovery rate	matching proteins in your network (IDs)	matching proteins in your network (labels)
MF	GO:0005201	Extracellular matrix structural constituent	5	119	2.01	1.68e-06	9606.ENSP00000265131,9606.ENSP00000266718,9606.ENSP00000295550,9606.ENSP00000325146,9606.ENSP00000327336	TNC,LUM,COL6A3,COL12A1,BGN
MF	GO:0005518	Collagen binding	3	68	2.03	0.0031	9606.ENSP00000223357,9606.ENSP00000266718,9606.ENSP00000434412	AEBP1,LUM,SERPINH1
MF	GO:0030021	Extracellular matrix structural constituent conferring compression resistance	2	14	2.54	0.0142	9606.ENSP00000266718,9606.ENSP00000327336	LUM,BGN
MF	GO:0004866	Endopeptidase inhibitor activity	3	181	1.61	0.0286	9606.ENSP00000295550,9606.ENSP00000415941,9606.ENSP00000434412	COL6A3,C4B,SERPINH1
MF	GO:0030020	Extracellular matrix structural constituent conferring tensile strength	2	28	2.24	0.0286	9606.ENSP00000295550,9606.ENSP00000325146	COL6A3,COL12A1
CC	GO:0062023	Collagen-containing extracellular matrix	7	396	1.64	1.99e-08	9606.ENSP00000223357,9606.ENSP00000265131,9606.ENSP00000266718,9606.ENSP00000295550,9606.ENSP00000325146,9606.ENSP00000327336,9606.ENSP00000434412	AEBP1,TNC,LUM,COL6A3,COL12A1,BGN,SERPINH1
CC	GO:0005615	Extracellular space	8	3195	0.79	0.00029	9606.ENSP00000223357,9606.ENSP00000265131,9606.ENSP00000266718,9606.ENSP00000295550,9606.ENSP00000325146,9606.ENSP00000327336,9606.ENSP00000415941,9606.ENSP00000434412	AEBP1,TNC,LUM,COL6A3,COL12A1,BGN,C4B,SERPINH1
CC	GO:0005581	Collagen trimer	3	88	1.92	0.0018	9606.ENSP00000266718,9606.ENSP00000295550,9606.ENSP00000325146	LUM,COL6A3,COL12A1
CC	GO:0005788	Endoplasmic reticulum lumen	4	308	1.5	0.0018	9606.ENSP00000265131,9606.ENSP00000295550,9606.ENSP00000325146,9606.ENSP00000434412	TNC,COL6A3,COL12A1,SERPINH1
CC	GO:0070062	Extracellular exosome	6	2099	0.84	0.0086	9606.ENSP00000223357,9606.ENSP00000266718,9606.ENSP00000295550,9606.ENSP00000325146,9606.ENSP00000327336,9606.ENSP00000415941	AEBP1,LUM,COL6A3,COL12A1,BGN,C4B
BP	GO:0030198	Extracellular matrix organization	6	338	1.64	9.85e-06	9606.ENSP00000265131,9606.ENSP00000266718,9606.ENSP00000295550,9606.ENSP00000325146,9606.ENSP00000327336,9606.ENSP00000434412	TNC,LUM,COL6A3,COL12A1,BGN,SERPINH1
BP	GO:0051216	Cartilage development	5	171	1.85	1.3e-05	9606.ENSP00000266718,9606.ENSP00000295550,9606.ENSP00000325146,9606.ENSP00000327336,9606.ENSP00000434412	LUM,COL6A3,COL12A1,BGN,SERPINH1
BP	GO:0003433	Chondrocyte development involved in endochondral bone morphogenesis	3	24	2.49	0.00034	9606.ENSP00000295550,9606.ENSP00000325146,9606.ENSP00000434412	COL6A3,COL12A1,SERPINH1
BP	GO:0030199	Collagen fibril organization	3	46	2.2	0.0011	9606.ENSP00000266718,9606.ENSP00000325146,9606.ENSP00000434412	LUM,COL12A1,SERPINH1
BP	GO:0060348	Bone development	4	199	1.69	0.0011	9606.ENSP00000295550,9606.ENSP00000325146,9606.ENSP00000327336,9606.ENSP00000434412	COL6A3,COL12A1,BGN,SERPINH1
BP	GO:0009888	Tissue development	6	1760	0.92	0.0109	9606.ENSP00000265131,9606.ENSP00000266718,9606.ENSP00000295550,9606.ENSP00000325146,9606.ENSP00000327336,9606.ENSP00000434412	TNC,LUM,COL6A3,COL12A1,BGN,SERPINH1
BP	GO:0003429	Growth plate cartilage chondrocyte morphogenesis	2	17	2.46	0.02	9606.ENSP00000295550,9606.ENSP00000325146	COL6A3,COL12A1
